# Supplementary material for: Occurrence, mortality and cost of brain disorders in Denmark: a population-based cohort study
Source: PubMed Central journal article supplement — BMJ Open. 2020 Nov 17;10(11):e037564. doi: 10.1136/bmjopen-2020-037564 (PMC7674107; doi:10.1136/bmjopen-2020-037564), 2020-11-17
Supplement: bmjopen-2020-037564.draft_revisions.pdf [file bmjopen-2020-037564.draft_revisions.pdf]

# BMJ Open

BMJ Open is committed to open peer review. As part of this commitment we make the peer review history of every article we publish publicly available.

When an article is published we post the peer reviewers' comments and the authors' responses online. We also post the versions of the paper that were used during peer review. These are the versions that the peer review comments apply to.

The versions of the paper that follow are the versions that were submitted during the peer review process. They are not the versions of record or the final published versions. They should not be cited or distributed as the published version of this manuscript.

BMJ Open is an open access journal and the full, final, typeset and author-corrected version of record of the manuscript is available on our site with no access controls, subscription charges or pay-per-view fees (<http://bmjopen.bmj.com>).

If you have any questions on BMJ Open's open peer review process please email [info.bmjopen@bmj.com](mailto:info.bmjopen@bmj.com)

# BMJ Open

## OCCURRENCE, MORTALITY, AND COST OF BRAIN DISORDERS IN DENMARK: A POPULATION-BASED COHORT STUDY

|                               |                                                                                                                                                                                                                                                                                                                                                                                                                                                                                                                        |
|-------------------------------|------------------------------------------------------------------------------------------------------------------------------------------------------------------------------------------------------------------------------------------------------------------------------------------------------------------------------------------------------------------------------------------------------------------------------------------------------------------------------------------------------------------------|
| Journal:                      | <i>BMJ Open</i>                                                                                                                                                                                                                                                                                                                                                                                                                                                                                                        |
| Manuscript ID                 | bmjopen-2020-037564                                                                                                                                                                                                                                                                                                                                                                                                                                                                                                    |
| Article Type:                 | Original research                                                                                                                                                                                                                                                                                                                                                                                                                                                                                                      |
| Date Submitted by the Author: | 07-Feb-2020                                                                                                                                                                                                                                                                                                                                                                                                                                                                                                            |
| Complete List of Authors:     | Vestergaard, Søren; Aarhus University Hospital, Department of Clinical Epidemiology<br>Rasmussen, Thomas; Aarhus University Hospital, Department of Clinical Epidemiology<br>Stallknecht, Sandra; NA, INCENTIVE<br>Olsen, Jens; NA, INCENTIVE<br>Skipper, Niels; Aarhus University, Department of Economics and Business Economics<br>Sørensen, Henrik T.; Aarhus University Hospital, Department of Clinical Epidemiology<br>Christiansen, Christian; Aarhus University Hospital, Department of Clinical Epidemiology |
| Keywords:                     | EPIDEMIOLOGY, Health economics < HEALTH SERVICES ADMINISTRATION & MANAGEMENT, NEUROLOGY, PSYCHIATRY                                                                                                                                                                                                                                                                                                                                                                                                                    |
|                               |                                                                                                                                                                                                                                                                                                                                                                                                                                                                                                                        |

SCHOLARONE™  
Manuscripts

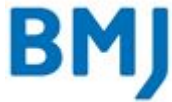

I, the Submitting Author has the right to grant and does grant on behalf of all authors of the Work (as defined in the below author licence), an exclusive licence and/or a non-exclusive licence for contributions from authors who are: i) UK Crown employees; ii) where BMJ has agreed a CC-BY licence shall apply, and/or iii) in accordance with the terms applicable for US Federal Government officers or employees acting as part of their official duties; on a worldwide, perpetual, irrevocable, royalty-free basis to BMJ Publishing Group Ltd ("BMJ") its licensees and where the relevant Journal is co-owned by BMJ to the co-owners of the Journal, to publish the Work in this journal and any other BMJ products and to exploit all rights, as set out in our [licence](#).

The Submitting Author accepts and understands that any supply made under these terms is made by BMJ to the Submitting Author unless you are acting as an employee on behalf of your employer or a postgraduate student of an affiliated institution which is paying any applicable article publishing charge ("APC") for Open Access articles. Where the Submitting Author wishes to make the Work available on an Open Access basis (and intends to pay the relevant APC), the terms of reuse of such Open Access shall be governed by a Creative Commons licence – details of these licences and which [Creative Commons](#) licence will apply to this Work are set out in our licence referred to above.

Other than as permitted in any relevant BMJ Author's Self Archiving Policies, I confirm this Work has not been accepted for publication elsewhere, is not being considered for publication elsewhere and does not duplicate material already published. I confirm all authors consent to publication of this Work and authorise the granting of this licence.

# OCCURRENCE, MORTALITY, AND COST OF BRAIN DISORDERS IN DENMARK: A POPULATION-BASED COHORT STUDY

Søren Viborg Vestergaard<sup>1</sup>, Thomas Bøjer Rasmussen<sup>1</sup>, Sandra Stallknecht<sup>2</sup>, Jens Olsen<sup>2</sup>, Niels Skipper<sup>3</sup>,  
Henrik Toft Sørensen<sup>1</sup>, Christian Fynbo Christiansen<sup>1</sup>

<sup>1</sup> Department of Clinical Epidemiology, Aarhus University Hospital, Aarhus, Denmark

<sup>2</sup> INCENTIVE, Holte, Denmark

<sup>3</sup> Department of Economics and Business Economics, Aarhus University, Aarhus, Denmark

**Email addresses:** [sovi@clin.au.dk](mailto:sovi@clin.au.dk), [tbr@clin.au.dk](mailto:tbr@clin.au.dk), [ses@incentive.dk](mailto:ses@incentive.dk), [jo@incentive.dk](mailto:jo@incentive.dk),  
[nskipper@econ.au.dk](mailto:nskipper@econ.au.dk), [hts@clin.au.dk](mailto:hts@clin.au.dk), [cfc@clin.au.dk](mailto:cfc@clin.au.dk)

**ORCID IDs:** SVV, [0000-0002-8445-7758](https://orcid.org/0000-0002-8445-7758); TBR, [0000-0003-0120-1712](https://orcid.org/0000-0003-0120-1712); SS, [0000-0002-1721-3665](https://orcid.org/0000-0002-1721-3665); NS, [0000-0001-5766-4420](https://orcid.org/0000-0001-5766-4420); HTS, [0000-0003-4299-7040](https://orcid.org/0000-0003-4299-7040); CFC, [0000-0002-0727-953X](https://orcid.org/0000-0002-0727-953X)

**Corresponding author address:** Søren Viborg Vestergaard (@epi\_viborg), Department of Clinical Epidemiology, Aarhus University Hospital, Olof Palmes Alle 43-45, 8200 Aarhus N, Denmark

**Word count, main text:** 3305 words

**Word count, abstract:** 293 words

**Keywords:** Brain disorders, mental disorders, neurologic disorders, epidemiology, cost-of-illness

## ABSTRACT

### Objectives

To examine the occurrence of brain disorders (*i.e.*, neurological and mental disorders) in Denmark and mortality and cost-of-illness among affected persons.

### Design

Matched cohort study.

### Setting

We obtained routinely collected registry data on all Danish residents during 1995-2015.

### Participants

We identified all persons alive on 1 January 2015 with a diagnosis of 25 specific brain disorders (prevalent cohort) and all persons with an incident diagnosis during 2011-2015 (incident cohort). Each person was matched on age and sex with 10 persons from the general population without a diagnosis of the specific brain disorder at the time of matching.

### Primary and secondary outcome measures

Prevalence and incidence of hospital-diagnosed brain disorders, 1-year absolute and relative mortality, and attributable direct and indirect costs-of-illness.

### Results

We identified 1,075,081 persons with prevalent brain disorders on 1 January 2015, corresponding to 18.9% of the Danish population. The incidence rate of *any brain disorder* during 2011-2015 was 1,349 per 100,000 person-years (95% confidence interval [CI]: 1,345-1,353). One-year mortality after diagnosis was increased in persons with *any brain disorder* (hazard ratio = 4.7 [95% CI: 4.7-4.8]) and in persons in every group of specific brain disorders compared to the matched cohort from the general population. The total attributable direct costs of brain disorders in 2015 were €5.2 billion and total attributable indirect costs

1  
2  
3  
4 were €11.2 billion. Traumatic brain injury, stress-related disorders, depression, and stroke were the most  
5  
6 common brain disorders. Attributable costs were highest for depression, dementia, stress-related  
7  
8 disorders, and stroke.  
9

## 10 **Conclusions**

11  
12  
13 One in five Danish residents alive on 1 January 2015 had been diagnosed with at least one brain disorder,  
14  
15 and mortality was five times higher in persons with any diagnosed brain disorder than in the general  
16  
17 population. We found high attributable direct and indirect costs of brain disorders.  
18  
19  
20  
21  
22  
23  
24  
25  
26  
27  
28  
29  
30  
31  
32  
33  
34  
35  
36  
37  
38  
39  
40  
41  
42  
43  
44  
45  
46  
47  
48  
49  
50  
51  
52  
53  
54  
55  
56  
57  
58  
59  
60

1  
2  
3  
4  
5  
6  
7  
8  
9  
10  
11  
12  
13  
14  
15  
16  
17  
18  
19  
20  
21  
22  
23  
24  
25  
26  
27  
28  
29  
30  
31  
32  
33  
34  
35  
36  
37  
38  
39  
40  
41  
42  
43  
44  
45  
46  
47  
48  
49  
50  
51  
52  
53  
54  
55  
56  
57  
58  
59  
60

## STRENGTHS AND LIMITATIONS OF THIS STUDY

- We examined epidemiology and societal costs of hospital-diagnosed brain disorders using individual-level data on a well-defined population with complete follow-up.
- Both epidemiology and cost were estimated among persons with one of 25 specific brain disorders, and among persons with any brain disorders taking into account comorbid disorders.
- We identified persons with incident brain disorders during 2011-2015, whereas persons alive on 1 January 2015 with brain disorders diagnosed from 1995 to 2014 were considered prevalent.
- We estimated 1-year mortality among persons with incident brain disorders, and direct and indirect societal costs among persons with prevalent brain disorders.
- Direct costs included cost of services in primary care, secondary care, and costs of medication, nursing home, sheltered accommodation, personal nursing, home nurse visits, and hospital-based neuro rehabilitation, whereas lost productivity was considered indirect costs.

## BACKGROUND

Brain disorders, including both neurological and mental disorders, are the leading cause of years lived with disability worldwide.<sup>1,2</sup> In 2010, it was estimated that 260 million persons in Europe (~50% of the population) lived with a brain disorder with an estimated total cost-of-illness of €798 billion.<sup>3,4</sup> Based on this appraisal, mental disorders alone were estimated to account for 4.1% of European countries' combined gross domestic product (GDP) in 2015.<sup>5</sup> The global burden of brain disorders is expected to double between 2010 and 2030.<sup>6,7</sup>

Previous estimates of overall occurrence and cost of brain disorders relied using heterogeneous data sources without individual-level data. This excluded consideration of comorbid brain disorders in estimates of the incidence, prevalence, mortality, and cost-of-illness of brain disorders.<sup>2,3,8</sup> Therefore, single persons with multiple disorders were counted more than once, causing potential overestimation of the occurrence. Previous studies also focused on cause-specific mortality rather than all-cause mortality. This could have led to underestimation of excess mortality associated with brain disorders due to incompletely recorded brain disorders on death certificates.<sup>2,9</sup> Thus there is a need for valid updated estimates of occurrence, mortality, and cost of brain disorders to better understand the public health burden and healthcare planning needs.<sup>7</sup>

We conducted this population-based study using routinely collected individual-level registry data to examine the prevalence and incidence of brain disorders in the Danish population during 2011-2015, as well as mortality and cost-of-illness in these patients.



## METHODS

### Setting

We conducted a population-based cohort study encompassing the entire Danish population during 2011-2015. In Denmark, healthcare is primarily tax-funded with equal access for every Danish resident. We examined occurrence, mortality, and costs of brain disorders using nationwide data from healthcare and socioeconomic registries.<sup>10</sup>

### Study design and participants

For each of 25 specific brain disorders, we established two cohorts: a prevalent cohort of persons alive on 1 January 2015 who had a diagnosis of the specific brain disorder recorded during the 1995-2014 period and an incident cohort of persons with a first-time diagnosis recorded during the 1 January 2011 to 31 December 2015 period. The following 25 predefined groups of brain disorders were examined: *alcohol abuse, anxiety disorders, bipolar disorder, brain tumours, cerebral palsy, dementia, depression, developmental and behavioural disorders, drug abuse, eating disorders, epilepsy, headache, infections of the central nervous system, intellectual disability, multiple sclerosis, neuromuscular disorders, other neurodegenerative disorders, Parkinson's disease, personality disorders, polyneuropathy, schizophrenia spectrum disorders, sleep disorders, stress-related disorders, stroke, and traumatic brain injury*. We also identified every Danish resident with *any brain disorder, i.e.*, each person with any of the specific 25 disorders was identified on the date of his or her first diagnosis.

For each of the 25 groups of brain disorders and the *any brain disorder group*, we created a matched comparison cohort for the incident cohort and a matched comparison cohort for the prevalent cohort. Each person in the two brain disorder cohorts was matched to 10 living persons from the general population on birth year and sex. Matched persons could not have the specific brain disorder as of the index date of the person with the brain disorder. The index dates of matching were the date of the brain disorder diagnosis for the incident cohort and 1 January 2015 for the prevalent cohort.

## Variables

The unambiguous personal identifier assigned to every Danish resident enabled us to identify and link every person across national registries to estimate occurrence, mortality, and cost-of-illness of brain disorders on the individual level (see detailed description of the data sources in Appendix 1).<sup>10</sup>

We identified persons with brain disorders by means of inpatient and outpatient hospital diagnoses (both primary and secondary diagnoses) coded in the Danish National Patient Registry according to the *International Classification of Diseases, Tenth Revision (ICD-10)*.<sup>11</sup> ICD codes are provided in Appendix 2.

To estimate mortality, we retrieved the dates of death of persons who died during the study period from the Danish Civil Registration System.<sup>10</sup>

To estimate direct costs, we obtained individual-level information on all primary care services provided by general practitioners and dentists from the Danish Health Service Registry,<sup>12</sup> individual-level medication expenditures from the Danish National Prescription Registry,<sup>13</sup> and individual-level information on nursing home or sheltered accommodation, personal nursing and other personal care, home nurse visits, and hospital-based neuro rehabilitation from Statistics Denmark.<sup>14</sup> We also computed costs of secondary care including hospital inpatient admissions, outpatient specialist clinic visits, and emergency room contacts based on the Diagnosis Related Group (DRG) and Danish Ambulatory Grouping System (DAGS) tariffs.<sup>15</sup>

Medication costs were computed using market prices for prescriptions filled at outpatient pharmacies and in-hospital medication costs were included in the DRG/DAGS tariffs. To estimate indirect costs, we first estimated lost productivity associated with illness by subtracting the personal income of persons in the matched comparison cohorts from the personal income of persons with brain disorders (all before taxes).

We then estimated lost productivity due to premature death (difference in actual age of death and expected age at death based on the average life expectancy of persons of same age and sex in Denmark).

We obtained 2015 cost information for persons in the prevalent cohort and their comparison cohort and from index date for persons in the incident cohort and their comparison cohort.

1  
2  
3  
4 Finally, we obtained information on prior comorbid brain disorders and on prior non-mental disorders  
5  
6 included in the Charlson Comorbidity Index (CCI) up to 10 years before the index date of every person in  
7  
8 the brain disorder and comparison cohorts.<sup>11</sup> Using the comorbid diseases included in the CCI, we  
9  
10 calculated a CCI score for every person (CCI score: 0 = low, 1-2 = medium, 3+ = high comorbidity).<sup>16, 17</sup>  
11  
12

### 13 **Statistical analyses**

#### 14 *Occurrence*

15  
16 We used any diagnosis from 1 January 1995 to 31 December 2014 as the basis for computing the period  
17  
18 prevalence of each of the 25 brain disorders in persons alive on 1 January 2015. To estimate the average  
19  
20 annual incidence of the different brain disorders, we computed incidence rates (IRs) of newly diagnosed  
21  
22 persons per 100 000 person-years at risk between 1 January 2011 and 31 December 2015. We considered a  
23  
24 person to be at risk of an incident specific brain disorder only if he or she did not have a diagnosis of that  
25  
26 specific brain disorder during 1995-2010. We characterised persons with brain disorders by age, sex, CCI  
27  
28 conditions, and CCI score on the index date across the 25 groups of disorders.  
29  
30  
31  
32  
33

#### 34 *Mortality*

35  
36 We computed 1-year mortality for persons with brain disorders and for persons in their matched  
37  
38 comparison cohorts and compared these by means of crude and adjusted hazard ratios (HRs) obtained  
39  
40 from a Cox regression model adjusted for age, sex, and CCI score.  
41  
42  
43  
44

#### 45 *Cost-of-illness*

46  
47 To estimate the economic burden of the 25 brain disorders, we used the human capital approach to  
48  
49 conduct a societal cost-of-illness analysis including both direct and indirect individual-level costs.<sup>18, 19</sup> For  
50  
51 each brain disorder, we computed direct and indirect costs-of-illness for every individual in our study  
52  
53 population. We estimated both overall annual costs and average annual costs per person. Direct costs were  
54  
55 computed both as actual direct costs (*i.e.*, costs of healthcare services) and attributable direct costs (*i.e.*,  
56  
57  
58  
59  
60

1  
2  
3  
4 the cost of healthcare services for persons with brain disorders minus the cost of healthcare services for  
5  
6 persons of the same age and sex in the comparison cohorts). For persons with incident brain disorders, we  
7  
8 further computed the distribution of the attributable direct costs per person during the first year after the  
9  
10 diagnosis, as we expected substantial direct and indirect costs during this year.  
11  
12

13  
14 We computed attributable indirect costs (*i.e.*, loss of productivity) in patients of working age, *i.e.*, ages 18-  
15  
16 65 years. In persons living with brain disorder diagnoses, we computed loss of productivity associated with  
17  
18 illness as yearly income before taxes in persons with brain disorders subtracted from the yearly income in  
19  
20 living members of the comparison cohorts. For persons who died after diagnoses of brain disorders, we  
21  
22 estimated loss of productivity due to premature death as the annual income during the year before death  
23  
24 multiplied by the number of lost years of life, assuming that they otherwise would have survived to age 66  
25  
26 years (accounting for the risk of dying each year and discounting future costs with 4% per annum).<sup>18, 19</sup>  
27  
28

### 29 30 *Sensitivity analyses*

31  
32 *As alcohol abuse, bipolar disorder, dementia, depression, drug abuse, headache, multiple sclerosis,*  
33  
34 *Parkinson's disease, and sleep disorders* are commonly treated in general practice, we performed sensitivity  
35  
36 analyses that included both persons with hospital diagnoses and persons who filled prescriptions for  
37  
38 relevant pharmacological treatments (including information on indication for the prescription when  
39  
40 relevant).<sup>13</sup> We repeated all occurrence and cost analyses on these extended cohorts.  
41  
42  
43

44  
45 In addition, we performed attributable cost analyses, in which we modelled the average annual costs per  
46  
47 person for each group of brain disorders using an ordinary least squares (OLS) regression, adjusting for  
48  
49 comorbid brain disorders in individuals with more than one brain disorder.  
50

51  
52 Analyses were performed using SAS version 9.4 (Cary, NC, USA), and visualization was made using Tidyverse  
53  
54 packages in R version 3.6.1.<sup>20</sup> The study was approved by the Danish Data Protection Agency through  
55  
56 registration at Aarhus University (record number 2016-051-000001/603). According to Danish legislation,  
57  
58  
59  
60

1  
2  
3  
4 no approval from an ethics committee or informed consent from patients is required for registry-based  
5  
6 studies.  
7

### 8 9 **Patient involvement statement**

10  
11 This study was done without patient involvement. Patients were not invited to comment on the study  
12  
13 design, to develop patient relevant outcomes, or interpret the results. Patients were not invited to  
14  
15 contribute to the writing or editing of the manuscript.  
16  
17

## 18 19 **RESULTS**

### 20 21 22 **Patient characteristics**

23  
24 The characteristics of 1 075 081 persons with prevalent brain disorders in 2015 are displayed in Figure 1,  
25  
26 and those of 381 759 persons with incident brain disorders during 2011-2015 are displayed in Suppl. Figure  
27  
28 1. Approximately half of persons with *any brain disorder* were female, occurrence was stable across ages,  
29  
30 and three out of four persons had no or mild comorbidity (both in the prevalent and incident cohorts)  
31  
32 (Figure 1, Suppl. Figure 1, Suppl. Table 1, and Suppl. Table 2). The proportions of persons with specific brain  
33  
34 disorders who were diagnosed with specific comorbid somatic or mental disorders before index date are  
35  
36 displayed in Suppl. Figure 2.  
37  
38  
39

### 40 41 **Occurrence**

42  
43 On 1 January 2015, 18.9% of the Danish population had been diagnosed with *any brain disorder*. Among  
44  
45 persons without prior brain disorder diagnoses, the IR of *any brain disorder* was 1 349 per 100 000 person-  
46  
47 years during 2011-2015 (Suppl. Table 3).  
48  
49

50  
51 The prevalence in 2015 and incidence in 2011-2015 of the 25 groups of brain disorders in the Danish  
52  
53 population are displayed in Figure 2. *Traumatic brain disorders* were the most common brain disorders,  
54  
55 with a prevalence of 4.4% (Figure 2 and Suppl. Table 3), followed by *stress-related disorders* (3.4%) and  
56  
57 *depression* (3.2%) (Figure 2).  
58  
59  
60

1  
2  
3  
4 During 2011-2015, IRs were highest for *stress-related disorders* (286 per 100 000 person-years [95% CI: 284-  
5 288]) and *depression* (279 per 100 000 person-years [95% CI: 277-281]) (Figure 2 and Suppl. Table 3).  
6  
7

### 8 9 **Mortality in persons with incident brain disorders**

10  
11  
12 One-year mortality was 7.8% among persons with *any brain disorder*, compared to 1.9% in the comparison  
13 cohort. After adjustment, persons with *any brain disorder* still had almost five-fold increased mortality  
14 (HR=4.7 [95% CI: 4.7-4.8]), and the HRs were increased in every group of brain disorders. One-year  
15 mortality was highest in persons with *other neurodegenerative disorders* (28.0%), *brain tumours* (24.5%),  
16 *stroke* (20.8%), and *dementia* (20.3%). Of note, mortality was more than ten-fold increased in persons with  
17 *other neurodegenerative disorders* (HR of 15.3 [95% CI: 13.2-17.7]), *brain tumours* (HR of 13.2 [95% CI:  
18 12.4-14.0]), and *anxiety disorders* (HR of 12.8 [95% CI: 12.4-13.3]) (Figure 3).  
19  
20  
21  
22  
23  
24  
25  
26  
27

### 28 **Cost-of-illness**

29  
30  
31 The total direct attributable costs of *any brain disorder* were €5.2 billion in 2015 in Denmark, with  
32 increased costs in every group of brain disorders. Specifically, attributable direct costs were highest in  
33 patients with prevalent *depression* (€1.2 billion), *dementia* (€1.1 billion), and *stroke* (€1.0 billion) (Figure 4  
34 and Suppl. Table 4). Importantly, the distribution of cost components varied considerably between brain  
35 disorders (Figure 4 and Figure 5).  
36  
37  
38  
39  
40

41  
42 Of note, the highest attributable costs per person in persons with prevalent brain disorders in 2015 was  
43 found in persons with *dementia* (€30K) and *Parkinson's disease* (€24K), mainly due to costs of nursing  
44 home/sheltered accommodation (Figure 5 and Suppl. Table 4).  
45  
46  
47  
48

49  
50 The average attributable direct costs of *any brain disorder* during the first year after diagnosis was €13K,  
51 though these differed widely between persons with different disorders. Costs were highest during the first  
52 year in persons with incident *brain tumours* (€44K) and *schizophrenia spectrum disorders* (€39K) (Suppl.  
53 Figure 3 and Suppl. Table 4).  
54  
55  
56  
57  
58  
59  
60

1  
2  
3  
4 Productivity of persons with brain disorders was reduced in every group of brain disorders. The total  
5 indirect costs in 2015 were €11.2 billion in persons with *any brain disorder*, mostly due to loss of  
6 productivity associated with illness (€10.9 billion) and less due to loss of productivity due to premature  
7 death (€0.3 billion). Specifically, lost productivity was €3.2 billion in persons with *stress-related disorders*,  
8 €2.9 billion in persons with *depression*, and €2.2 billion in persons with *alcohol abuse*. Finally, we found that  
9 the indirect costs were largely made up of costs due to lost productivity in patients living with illness, while  
10 costs due to lost productivity due to premature death contributed little (Figure 6 and Suppl. Table 5).  
11  
12  
13  
14  
15  
16  
17  
18  
19

### 20 **Sensitivity analyses**

21  
22  
23 Adding persons with filled prescriptions to the hospital-diagnosed cohorts, we found that occurrence of  
24 *alcohol abuse*, *bipolar disorder*, and *dementia* increased little, while occurrence of *anxiety disorders*,  
25 *depression*, *headache*, *Parkinson's disease*, and *sleep disorders* increased several-fold (Suppl. Figure 4).  
26  
27  
28  
29

30 Prevalence of *any brain disorders* increased to 30.2%, and total attributable costs in these persons in 2015  
31 were €22.5 billion, of which direct costs were €6.5 billion and indirect costs were €16.0 billion (data not  
32 shown).  
33  
34  
35  
36

37 In the OLS regression, we accounted for comorbid brain disorders when estimating per-person costs  
38 associated with each brain disorder. We found that *dementia* (€23K) and *Parkinson's disease* (€17K) were  
39 associated with the highest per-person additional direct cost-of-illness after adjustment for comorbid brain  
40 disorders (Suppl. Figure 5). Of note, removing outliers (the 99% percentile) changed results considerably,  
41 indicating that the 1% of persons with highest costs-of-illness contributed a considerable share of the total  
42 costs.  
43  
44  
45  
46  
47  
48  
49

## 50 **DISCUSSION**

51  
52  
53 We performed a study of occurrence, mortality, and cost of hospital-diagnosed brain disorders using high-  
54 quality, individual-level data. Brain disorders were common: one in five persons in Denmark had prevalent  
55 brain disorders in 2015. We found the most prevalent disorders to be *traumatic brain injury*, *stress-related*  
56  
57  
58  
59  
60

1  
2  
3  
4 *disorders, and depression, whereas the disorders with the highest incidence were stress-related disorders,*  
5  
6 *depression, and stroke. One-year mortality was five-fold increased in persons with any brain disorder and*  
7  
8 was increased in persons with any type of brain disorder. The attributable direct costs of persons with *any*  
9  
10 *brain disorder* were more than €5 billion. The more common brain disorders—*depression, dementia, and*  
11  
12 *stroke*—accounted for the highest total attributable direct costs among persons with prevalent disorders.  
13  
14 Attributable direct costs per person were highest in persons with *dementia and Parkinson's disease*. The  
15  
16 total attributable indirect costs due to loss of productivity in persons with any prevalent brain disorder  
17  
18 were twice as high as direct costs.  
19  
20  
21

22  
23 Even though our findings are based on high-quality population-based registries, some limitations should be  
24  
25 considered when interpreting our findings. We may have underestimated the prevalence, incidence, and  
26  
27 total cost of non-severe brain disorders, as some patients were treated solely in general practice or were  
28  
29 undiagnosed. This is especially relevant for disorder that are mainly treated in primary care, or not treated  
30  
31 at all, and therefore were not captured in our main analyses such as *anxiety,*<sup>21</sup> *headache,*<sup>22</sup> and *sleep*  
32  
33 *disorders.*<sup>23</sup> We addressed this in a sensitivity analysis that also identified patient-based filled prescriptions  
34  
35 for relevant medications.  
36  
37  
38

39 We estimated the period prevalence among living persons who had been diagnosed with brain disorders  
40  
41 during the preceding 20 years, even though some disorders may be reversible. We chose this approach as a  
42  
43 period with severe disease may affect future income and use of healthcare services.  
44  
45

46 Although we used all diseases from the CCI (covering 19 groups of disorders) to describe non-mental  
47  
48 comorbidity and to adjust for confounding in our mortality analyses, we cannot rule out residual or  
49  
50 unmeasured confounding in our estimates of HRs of death.<sup>16, 17, 24</sup>  
51  
52

53 While we had detailed data on direct costs, we lacked information on municipally supported rehabilitation,  
54  
55 assistance supplies, and transportation costs related to treatment and rehabilitation. Similarly, our cost  
56  
57 analyses did not include intangible costs (*e.g.*, due to decreased quality of life) and costs of informal care  
58  
59  
60



1  
2  
3  
4 provided by relatives, which may be considerable in conditions such as *dementia*.<sup>25</sup> Yet, we included costs  
5  
6 of nursing homes, sheltered accommodation, and home nursing, and we found the annual cost per person  
7  
8 with *dementia* (€30K) similar to that previously reported.<sup>26, 27</sup>  
9

10  
11 Our study described the cost-of-illness in patients with brain disorders, but did not isolate the cost of the  
12  
13 disease itself as patients with brain disorders are known to have a high load of comorbidity.<sup>28-30</sup>  
14

15  
16 We estimated the prevalence and incidence of *any brain disorder* using individual-level data, which allowed  
17  
18 us to capture concurrent brain disorders,<sup>28</sup> opposed to the prior studies based on literature reviews that  
19  
20 included a mix of hospital-diagnosed disorders and disorders reported in population surveys.<sup>3, 5</sup> Beside  
21  
22 using different eligibility criteria, double counting of individuals with concurrent brain disorders may  
23  
24 explain the previously reported total 1-year prevalence of brain disorders of ~50% (260 million affected  
25  
26 among 514 million population in Europe),<sup>3</sup> which is markedly higher than what we found despite including  
27  
28 prevalent disorders during a 20-year period.<sup>8, 9</sup>  
29  
30

31  
32 A recent Danish study reported a 2.5-fold increased mortality rate in persons with hospital-diagnosed  
33  
34 mental disorders compared to persons from the general population,<sup>31</sup> which is markedly lower than  
35  
36 mortality of *any brain disorders* in our study – likely explained by our use of different length of follow-up  
37  
38 (*i.e.*, long-term as opposed to 1-year).  
39  
40

41  
42 We found that the total attributable direct and indirect costs of brain disorders in Denmark in 2015 were  
43  
44 €16.4 billion, equivalent to 5.9% of the Danish GDP (€273 billion in 2015).<sup>32</sup> This is only slightly higher than  
45  
46 the recently reported costs of mental illness alone of €15 billion in Denmark in 2015 corresponding to 5.4%  
47  
48 of the GDP.<sup>5</sup> However, when we included persons identified from filled prescriptions in addition to hospital-  
49  
50 based diagnoses in sensitivity analyses, the prevalence increased and total attributable costs of *any brain*  
51  
52 *disorders* increased substantially, indicating that the costs may be higher than previously estimated when  
53  
54 not restricting to hospital-diagnosed persons.<sup>3, 5</sup>  
55  
56  
57  
58  
59  
60

1  
2  
3  
4 Finally, previous Danish studies of selected brain disorders reported lower total costs of disorders such as  
5 dementia,<sup>25</sup> stroke,<sup>33</sup> Parkinson's disease,<sup>34</sup> and epilepsy.<sup>35</sup> These studies did not include costs of home  
6  
7 nursing and nursing homes, and when accounting for that, our findings are comparable.<sup>25, 33-35</sup>  
8  
9

10  
11 As the already large burden of brain disorders is expected to increase in the future,<sup>6</sup> prevention and  
12  
13 effective early intervention are essential.<sup>5</sup> The potential to prevent stroke, infections of the central nervous  
14  
15 system, and mental disorders is established, whereas the potential to prevent other neurological disorders  
16  
17 remains unclear.<sup>36, 37</sup> As comorbidity load is substantial in persons with brain disorders, cost-of-illness may  
18  
19 be reduced by preventing and improving treatment of comorbid disorders.<sup>30</sup>  
20  
21  
22

23 We found that one in five persons alive in Denmark had been diagnosed with a brain disorder. One-year  
24  
25 mortality was five-fold increased in persons with an incident brain disorder. Mortality was increased in  
26  
27 every group of brain disorders, underscoring the illness of these patients. The severity also was reflected in  
28  
29 the very high cost-of-illness in persons with brain disorders, with total attributable costs of €16.4 billion in  
30  
31 Denmark in 2015, including direct costs of €5.2 billion and indirect costs of €11.2 billion.  
32  
33

34 Occurrence of brain disorders is expected to increase in the future. As brain disorders already use a large  
35  
36 proportion of healthcare resources and come with high indirect costs, effective prevention and intervention  
37  
38 strategies must be developed.  
39  
40  
41  
42  
43

## 44 **ACKNOWLEDGEMENTS**

45  
46 We are grateful to the Board of Clinical Specialists in Neurology and Psychiatry for its invaluable input on  
47  
48 the definitions of brain disorders and its feedback on preliminary analyses. Specifically, we would like to  
49  
50 thank Prof. Grethe Andersen, Prof. Ulrik Becker, Prof. Niels Bilenberg, Assoc. Prof. Jakob Christensen, Prof.  
51  
52 Per Fink, Prof. David Gaist, Prof. Poul Jørgen Jennum, Assoc. Prof. Nils Koch-Henriksen, Prof. Jørgen  
53  
54 Feldbæk Nielsen, Prof. Søren Dinesen Østergaard, and Prof. John Rosendahl Østergaard for providing great  
55  
56 clinical expertise concerning our codebook. Also, we are grateful of the contributions of Anne Staub  
57  
58  
59  
60

1  
2  
3  
4 Rasmussen to the first version of the codebook. Thanks to Prof. John McGrath for input on the project and  
5  
6 inspiration to visual presentation of the data. Finally, a huge thanks to Helle Vester for great project  
7  
8 management and for neat proofreading of the manuscript.  
9

## 10 **CONTRIBUTIONS**

11  
12  
13 CFC and HTS contributed to the study conception. CFC, HTS, NS, JO, SS, TBR, and SVV designed the study  
14  
15 and wrote a statistical analyses plan. NS, JO, and SS outlined the economic methods, and SS and JO  
16  
17 performed the data management and analyses of the economic data. TBR performed the remaining data  
18  
19 management and analyses, and performed all final analyses. All authors interpreted the results, and TBR,  
20  
21 SVV, and CFC visualized the data. SVV drafted the first manuscript, and all authors revised the manuscript  
22  
23 and approved the final version.  
24  
25

## 26 **COMPETING INTERESTS**

27  
28 The authors have no specific competing interests to declare.  
29

## 30 **FUNDING**

31  
32 This work was supported by a grant from Lundbeckfonden (grant no. R248-2017-521).  
33  
34

## 35 **ETHICAL APPROVAL**

36  
37 Not required.  
38  
39

## 40 **DATA SHARING**

41  
42 Data are available as presented in the paper and in the Supporting Information files. According to Danish  
43  
44 legislation, our approvals to use the Danish data sources for the current study do not allow us to distribute  
45  
46 or make patient data directly available to other parties. Data access and information about availability is  
47  
48 accessible through Statistics Denmark (website: <https://www.dst.dk/en/TilSalg/Forskningsservice>, e-mail:  
49  
50 [dst@dst.dk](mailto:dst@dst.dk)).  
51  
52  
53  
54  
55  
56  
57  
58  
59  
60

## Figure Legends

**Figure 1. Characteristics of patients with prevalent brain disorders in Denmark in 2015 sorted from highest to lowest prevalence (the white line in the age distribution represents the median age in each cohort).**

Abbreviations: CNS, central nervous system; CCI, Charlson Comorbidity Index

**Figure 2. Occurrence of brain disorders in the Danish population sorted from highest to lowest incidence, including incidence during 2011-2015 and prevalence in 2015.**

Abbreviations: CNS, central nervous system

**Figure 3. One-year mortality in patients with incident brain disorders in Denmark during 2011-2015 compared with the general population (comparison group). Hazard ratios are adjusted for age, sex, and comorbidity score. Specific disorders are sorted by hazard ratios.**

Abbreviations: CI, confidence interval; CNS, central nervous system

**Figure 4. Total attributable direct costs in persons with prevalent brain disorders in Denmark in 2015 (in 2015 prices) sorted from highest to lowest costs.**

Abbreviations: CNS, central nervous system

**Figure 5. Attributable direct costs per person in individuals with prevalent brain disorders in Denmark in 2015 (in 2015 prices) sorted from highest to lowest costs.**

Abbreviations: CNS, central nervous system

**Figure 6. Total attributable indirect costs due to lost productivity in persons with prevalent brain disorders in Denmark in 2015 (in 2015 prices) sorted from highest to lowest costs.**

Abbreviations: CNS, central nervous system

1  
2  
3  
4  
5  
6  
7  
8  
9  
10  
11  
12  
13  
14  
15  
16  
17  
18  
19  
20  
21  
22  
23  
24  
25  
26  
27  
28  
29  
30  
31  
32  
33  
34  
35  
36  
37  
38  
39  
40  
41  
42  
43  
44  
45  
46  
47  
48  
49  
50  
51  
52  
53  
54  
55  
56  
57  
58  
59  
60

## References

1. GBD 2015 Neurological Disorders Collaborator Group. Global, regional, and national burden of neurological disorders during 1990–2015: a systematic analysis for the Global Burden of Disease Study 2015. *The Lancet Neurology* 2017;16(11):877-97. doi: [https://doi.org/10.1016/S1474-4422\(17\)30299-5](https://doi.org/10.1016/S1474-4422(17)30299-5)
2. Whiteford HA, Ferrari AJ, Degenhardt L, et al. The global burden of mental, neurological and substance use disorders: an analysis from the Global Burden of Disease Study 2010. *PLoS One* 2015;10(2):e0116820. doi: 10.1371/journal.pone.0116820
3. Gustavsson A, Svensson M, Jacobi F, et al. Cost of disorders of the brain in Europe 2010. *Eur Neuropsychopharmacol* 2011;21(10):718-79. doi: 10.1016/j.euroneuro.2011.08.008
4. Olesen J, Gustavsson A, Svensson M, et al. The economic cost of brain disorders in Europe. *Eur J Neurol* 2012;19(1):155-62. doi: 10.1111/j.1468-1331.2011.03590.x
5. OECD EU. Health at a Glance: Europe 2018: State of Health in the EU Cycle. Paris/European Union, Brussels.2018:212. doi: [https://doi.org/10.1787/health\\_glance\\_eur-2018-en](https://doi.org/10.1787/health_glance_eur-2018-en)
6. Bloom DE, Cafiero, E.T., Jané-Llopis, E., Abrahams-Gessel, S., Bloom, L.R., Fathima, S., Feigl, A.B., Gaziano, T., Mowafi, M., Pandya, A., Prettner, K., Rosenberg, L., Seligman, B., Stein, A., & Weinstein, C. The Global Economic Burden of Non-communicable Diseases. Geneva: World Economic Forum, 2011. Available from: <http://apps.who.int/medicinedocs/documents/s18806en/s18806en.pdf> accessed 12 Dec 2019.
7. Trautmann S, Rehm J, Wittchen HU. The economic costs of mental disorders: Do our societies react appropriately to the burden of mental disorders? *EMBO Rep* 2016;17(9):1245-9. doi: 10.15252/embr.201642951
8. Sørensen HT. Global burden of neurological disorders: challenges and opportunities with the available data. *The Lancet Neurology* 2019;18(5):420-21. doi: 10.1016/S1474-4422(19)30027-4
9. Vigo D, Thornicroft G, Atun R. Estimating the true global burden of mental illness. *Lancet Psychiatry* 2016;3(2):171-8. doi: 10.1016/s2215-0366(15)00505-2
10. Schmidt M, Schmidt SAJ, Adelborg K, et al. The Danish health care system and epidemiological research: from health care contacts to database records. *Clin Epidemiol* 2019;11:563-91. doi: 10.2147/clep.S179083
11. Schmidt M, Schmidt SA, Sandegaard JL, et al. The Danish National Patient Registry: a review of content, data quality, and research potential. *Clinical epidemiology* 2015;7:449-90. doi: 10.2147/CLEP.S91125 [doi]
12. Andersen JS, Olivarius Nde F, Krasnik A. The Danish National Health Service Register. *Scand J Public Health* 2011;39(7 Suppl):34-7. doi: 10.1177/1403494810394718
13. Pottegard A, Schmidt SAJ, Wallach-Kildemoes H, et al. Data Resource Profile: The Danish National Prescription Registry. *Int J Epidemiol* 2017;46(3):798-98f. doi: 10.1093/ije/dyw213

- 1  
2  
3  
4 14. Statistics Denmark. Documentation of statistics [cited 2019 12/12]. Available from:  
5 <https://www.dst.dk/en/Statistik/dokumentation/documentationofstatistics> accessed 12 Dec 2019.  
6
- 7  
8 15. Ankjaer-Jensen A, Rosling P, Bilde L. Variable prospective financing in the Danish hospital sector and the  
9 development of a Danish case-mix system. *Health care management science* 2006;9(3):259-68.  
10
- 11 16. Charlson ME, Pompei P, Ales KL, et al. A new method of classifying prognostic comorbidity in  
12 longitudinal studies: development and validation. *J Chronic Dis* 1987;40(5):373-83.  
13
- 14 17. Thygesen SK, Christiansen CF, Christensen S, et al. The predictive value of ICD-10 diagnostic coding used  
15 to assess Charlson comorbidity index conditions in the population-based Danish National Registry  
16 of Patients. *BMC Med Res Methodol* 2011;11:83. doi: 10.1186/1471-2288-11-83  
17
- 18 18. Drummond M, Sculpher MJ, Claxton K, Stoddart GL, Torrance GW. Methods for the economic  
19 evaluation of health care programmes. 3. ed. ed. Oxford: Oxford University Press 2005.  
20
- 21 19. Drummond MF, McGuire A. Economic evaluation in health care : merging theory with practice. New  
22 York: Oxford University Press 2001.  
23
- 24 20. Wickham H, Averick M, Bryan J, et al. Welcome to the Tidyverse. *Journal of Open Source Software*  
25 2019;4(43):1686. doi: 10.21105/joss.01686  
26
- 27 21. Alonso J, Angermeyer MC, Bernert S, et al. Prevalence of mental disorders in Europe: results from the  
28 European Study of the Epidemiology of Mental Disorders (ESEMeD) project. *Acta Psychiatr Scand*  
29 *Suppl* 2004(420):21-7. doi: 10.1111/j.1600-0047.2004.00327.x  
30
- 31 22. Stovner L, Andrée C. Prevalence of headache in Europe: A review for the Eurolight project. *The journal*  
32 *of headache and pain* 2010;11:289-99. doi: 10.1007/s10194-010-0217-0  
33
- 34 23. Kerkhof GA. Epidemiology of sleep and sleep disorders in The Netherlands. *Sleep Med* 2017;30:229-39.  
35 doi: 10.1016/j.sleep.2016.09.015  
36
- 37 24. Schneeweiss S, Seeger JD, Maclure M, et al. Performance of Comorbidity Scores to Control for  
38 Confounding in Epidemiologic Studies using Claims Data. *American Journal of Epidemiology*  
39 2001;154(9):854-64. doi: 10.1093/aje/154.9.854  
40
- 41 25. Frahm-Falkenberg S, Ibsen R, Kjellberg J, et al. Health, social and economic consequences of dementias:  
42 a comparative national cohort study. *European journal of neurology* 2016;23(9):1400-07. doi:  
43 10.1111/ene.13043  
44
- 45 26. Schaller S, Mauskopf J, Kriza C, et al. The main cost drivers in dementia: a systematic review. *Int J*  
46 *Geriatr Psychiatry* 2015;30(2):111-29. doi: 10.1002/gps.4198  
47
- 48 27. Cantarero-Prieto D, Leon PL, Blazquez-Fernandez C, et al. The economic cost of dementia: A systematic  
49 review. *Dementia (London)* 2019;1471301219837776. doi: 10.1177/1471301219837776  
50
- 51 28. Plana-Ripoll O, Pedersen CB, Holtz Y, et al. Exploring Comorbidity Within Mental Disorders Among a  
52 Danish National Population. *JAMA Psychiatry* 2019;76(3):259-70. doi:  
53 10.1001/jamapsychiatry.2018.3658  
54  
55  
56  
57  
58  
59  
60

1  
2  
3  
4  
5  
6  
7  
8  
9  
10  
11  
12  
13  
14  
15  
16  
17  
18  
19  
20  
21  
22  
23  
24  
25  
26  
27  
28  
29  
30  
31  
32  
33  
34  
35  
36  
37  
38  
39  
40  
41  
42  
43  
44  
45  
46  
47  
48  
49  
50  
51  
52  
53  
54  
55  
56  
57  
58  
59  
60

29. Barnett K, Mercer SW, Norbury M, et al. Epidemiology of multimorbidity and implications for health care, research, and medical education: a cross-sectional study. *Lancet* 2012;380(9836):37-43. doi: 10.1016/S0140-6736(12)60240-2
30. Lawrence D, Hancock KJ, Kisely S. The gap in life expectancy from preventable physical illness in psychiatric patients in Western Australia: retrospective analysis of population based registers. *BMJ : British Medical Journal* 2013;346:f2539. doi: 10.1136/bmj.f2539
31. Plana-Ripoll O, Pedersen CB, Agerbo E, et al. A comprehensive analysis of mortality-related health metrics associated with mental disorders: a nationwide, register-based cohort study. *The Lancet* 2019 doi: 10.1016/S0140-6736(19)32316-5
32. Statistics Denmark. Annual national accounts [cited 2019 12/12]. Available from: <https://www.dst.dk/en/Statistik/emner/nationalregnskab-og-offentlige-finanser/aarligt-nationalregnskab> accessed 12 Dec 2019.
33. Jennum P, Iversen HK, Ibsen R, et al. Cost of stroke: a controlled national study evaluating societal effects on patients and their partners. *BMC Health Serv Res* 2015;15:466-66. doi: 10.1186/s12913-015-1100-0
34. Jennum P, Zoetmulder M, Korbo L, et al. The health-related, social, and economic consequences of parkinsonism: a controlled national study. *J Neurol* 2011;258(8):1497-506. doi: 10.1007/s00415-011-5969-1
35. Jennum P, Sabers A, Christensen J, et al. Welfare consequences for people with epilepsy and their partners: A matched nationwide study in Denmark. *Seizure* 2017;49:17-24. doi: 10.1016/j.seizure.2017.05.007
36. Arango C, Díaz-Caneja CM, McGorry PD, et al. Preventive strategies for mental health. *The Lancet Psychiatry* 2018;5(7):591-604. doi: 10.1016/S2215-0366(18)30057-9
37. Rudd AG, Wolfe CDA, Howard RS. Prevention of neurological disease in later life. *Journal of Neurology, Neurosurgery & Psychiatry* 1997;63(suppl 1):S39-S52. doi: 10.1136/jnnp.63.2008.39S

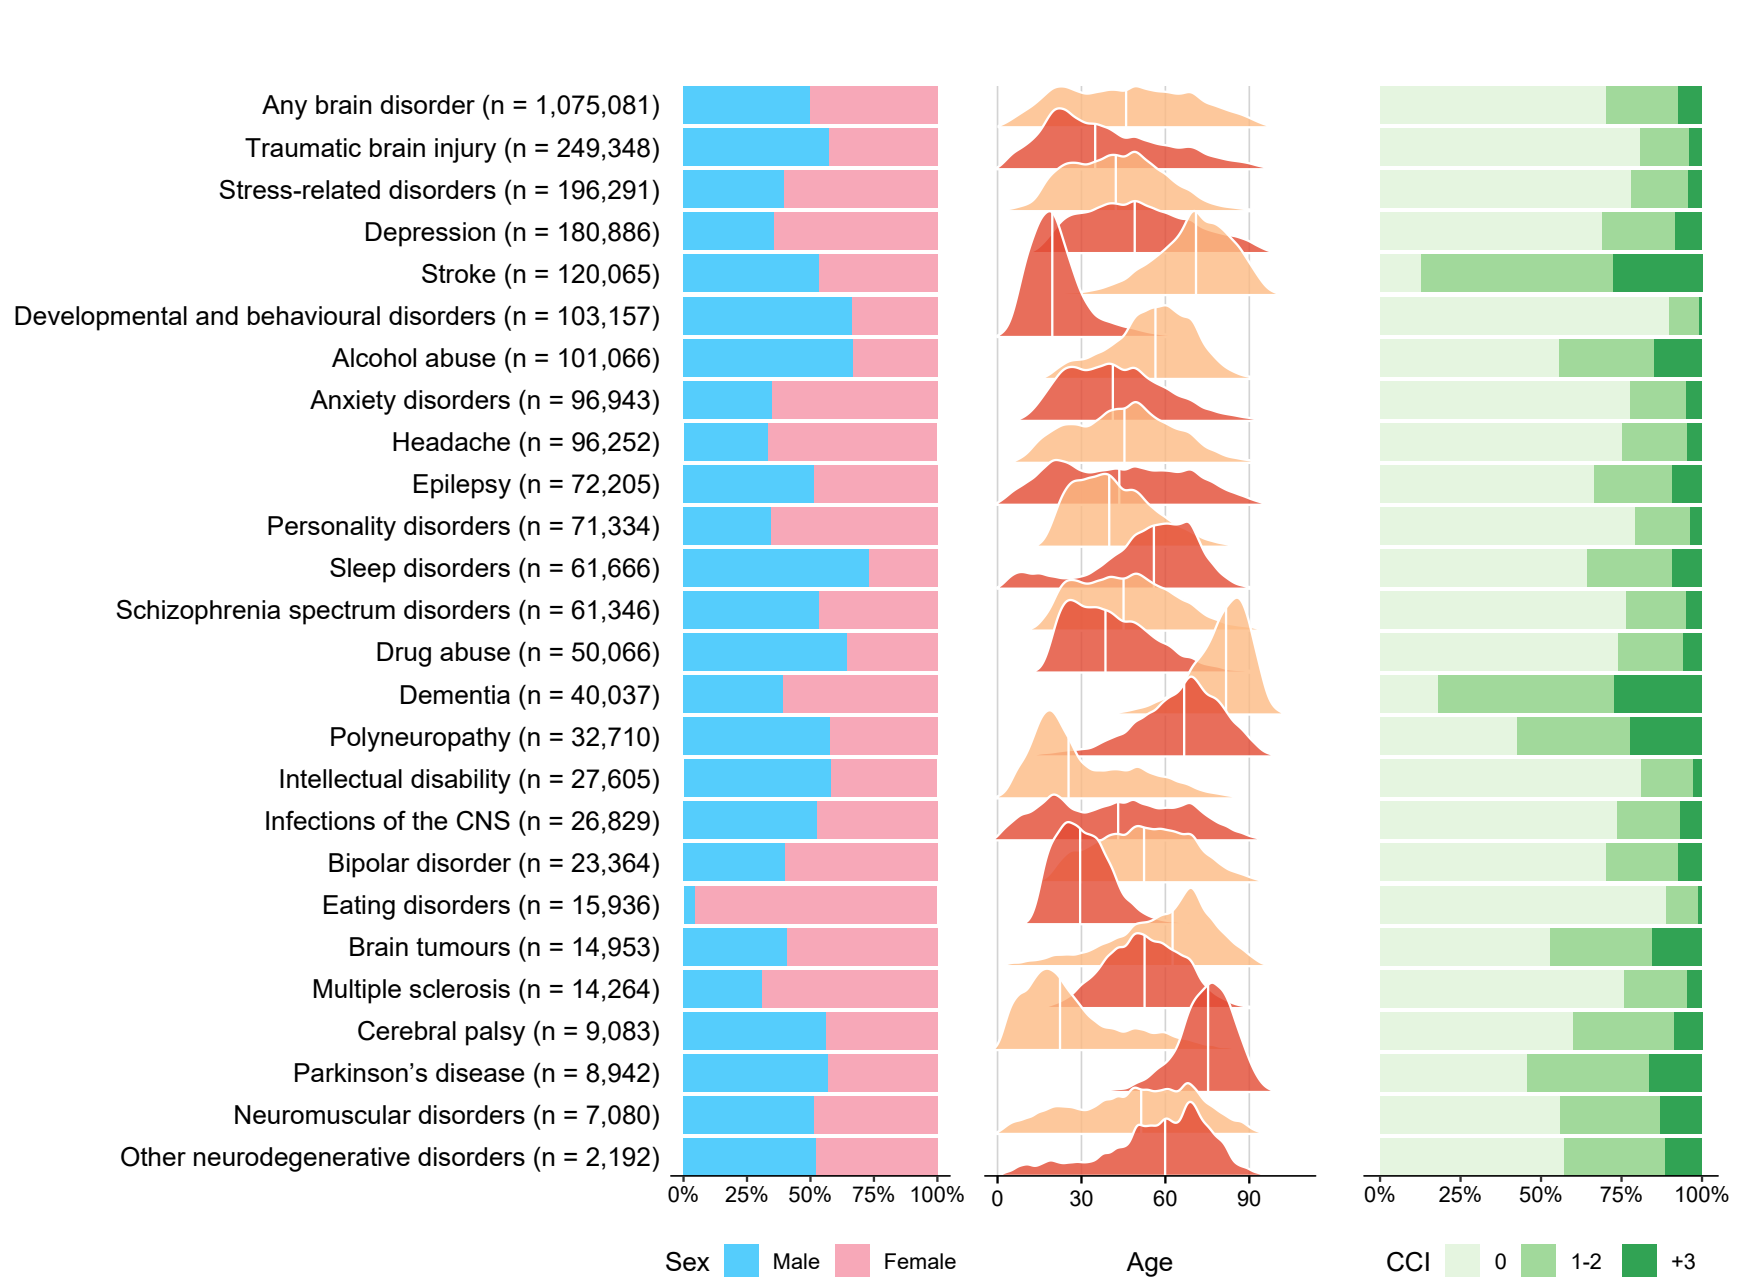

Figure 1: Characteristics of patients with prevalent brain disorders in Denmark in 2015 sorted from highest to lowest prevalence (the white line in the age distribution represents the median age in each cohort).

Abbreviations: CNS, central nervous system; CCI, Charlson Comorbidity Index

For peer review only - <http://bmjopen.bmj.com/site/about/guidelines.xhtml>



1  
2  
3  
4  
5  
6  
7  
8  
9  
10  
11  
12  
13  
14  
15  
16  
17  
18  
19  
20  
21  
22  
23  
24  
25  
26  
27  
28  
29  
30  
31  
32  
33  
34  
35  
36  
37  
38  
39  
40  
41  
42  
43  
44  
45  
46  
47

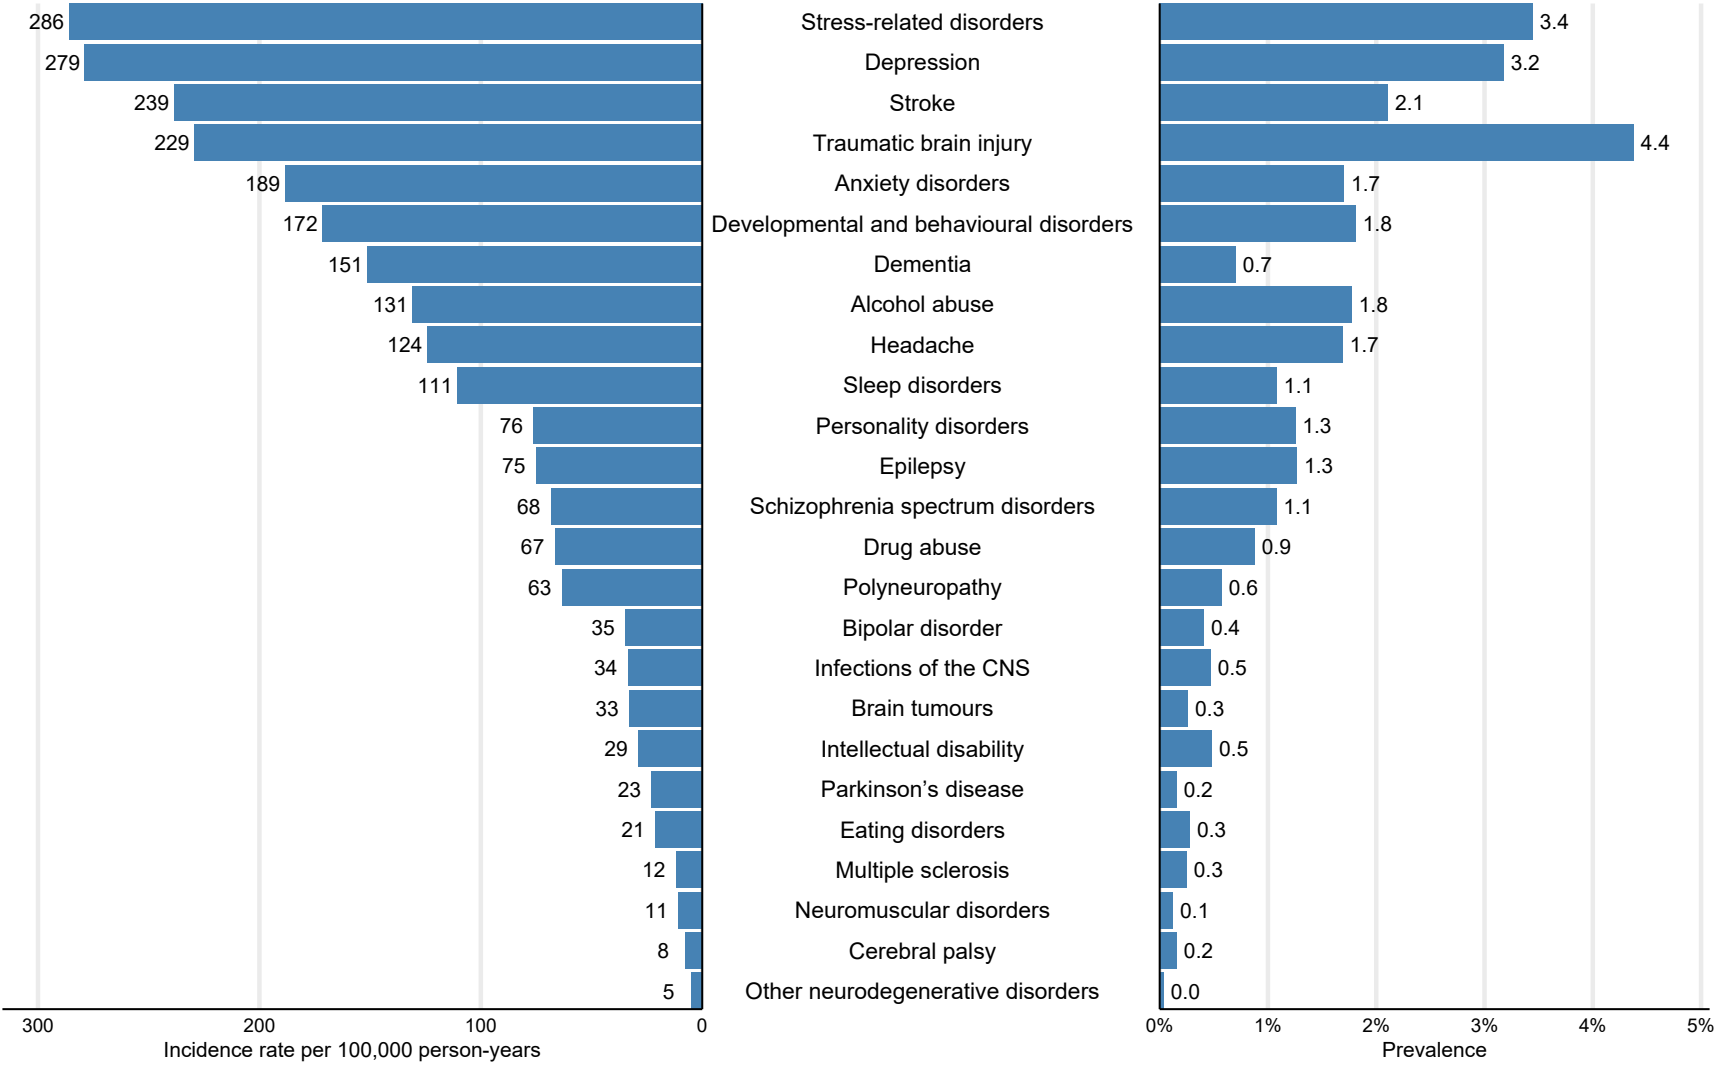

Figure 2: Occurrence of brain disorders in the Danish population sorted from highest to lowest incidence, including incidence during 2011-2015 and prevalence in 2015. Abbreviations: CNS, central nervous system

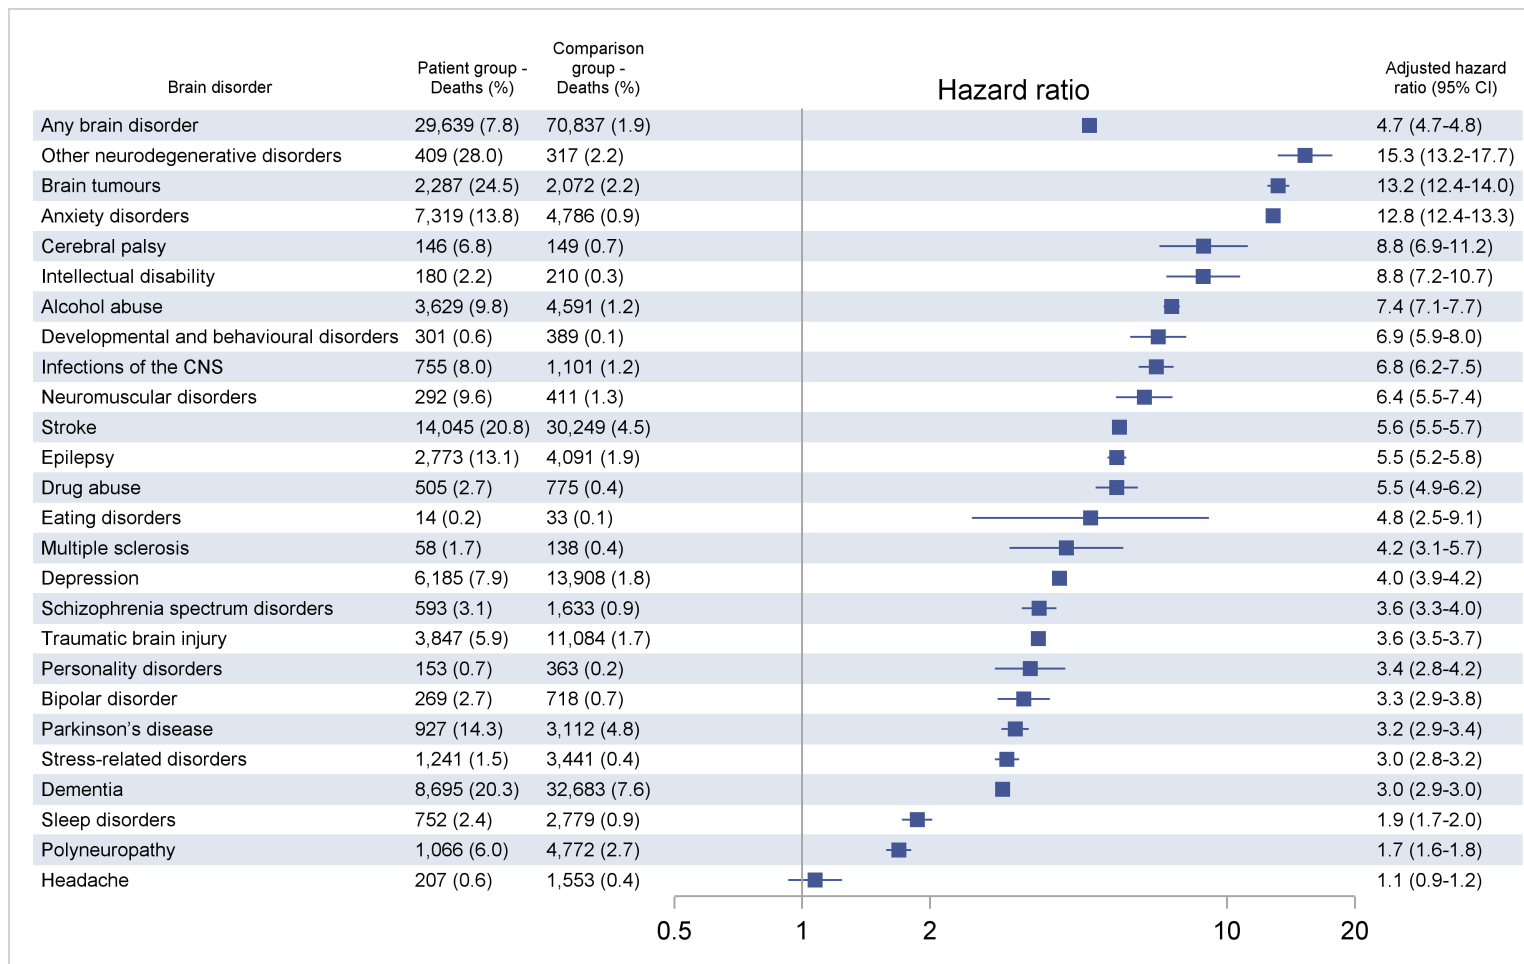

Figure 3: One-year mortality in patients with incident brain disorders in Denmark during 2011-2015 compared with the general population (comparison group). Hazard ratios are adjusted for age, sex, and comorbidity score. Specific disorders are sorted by hazard ratios. Abbreviations: CI, confidence interval; CNS, central nervous system

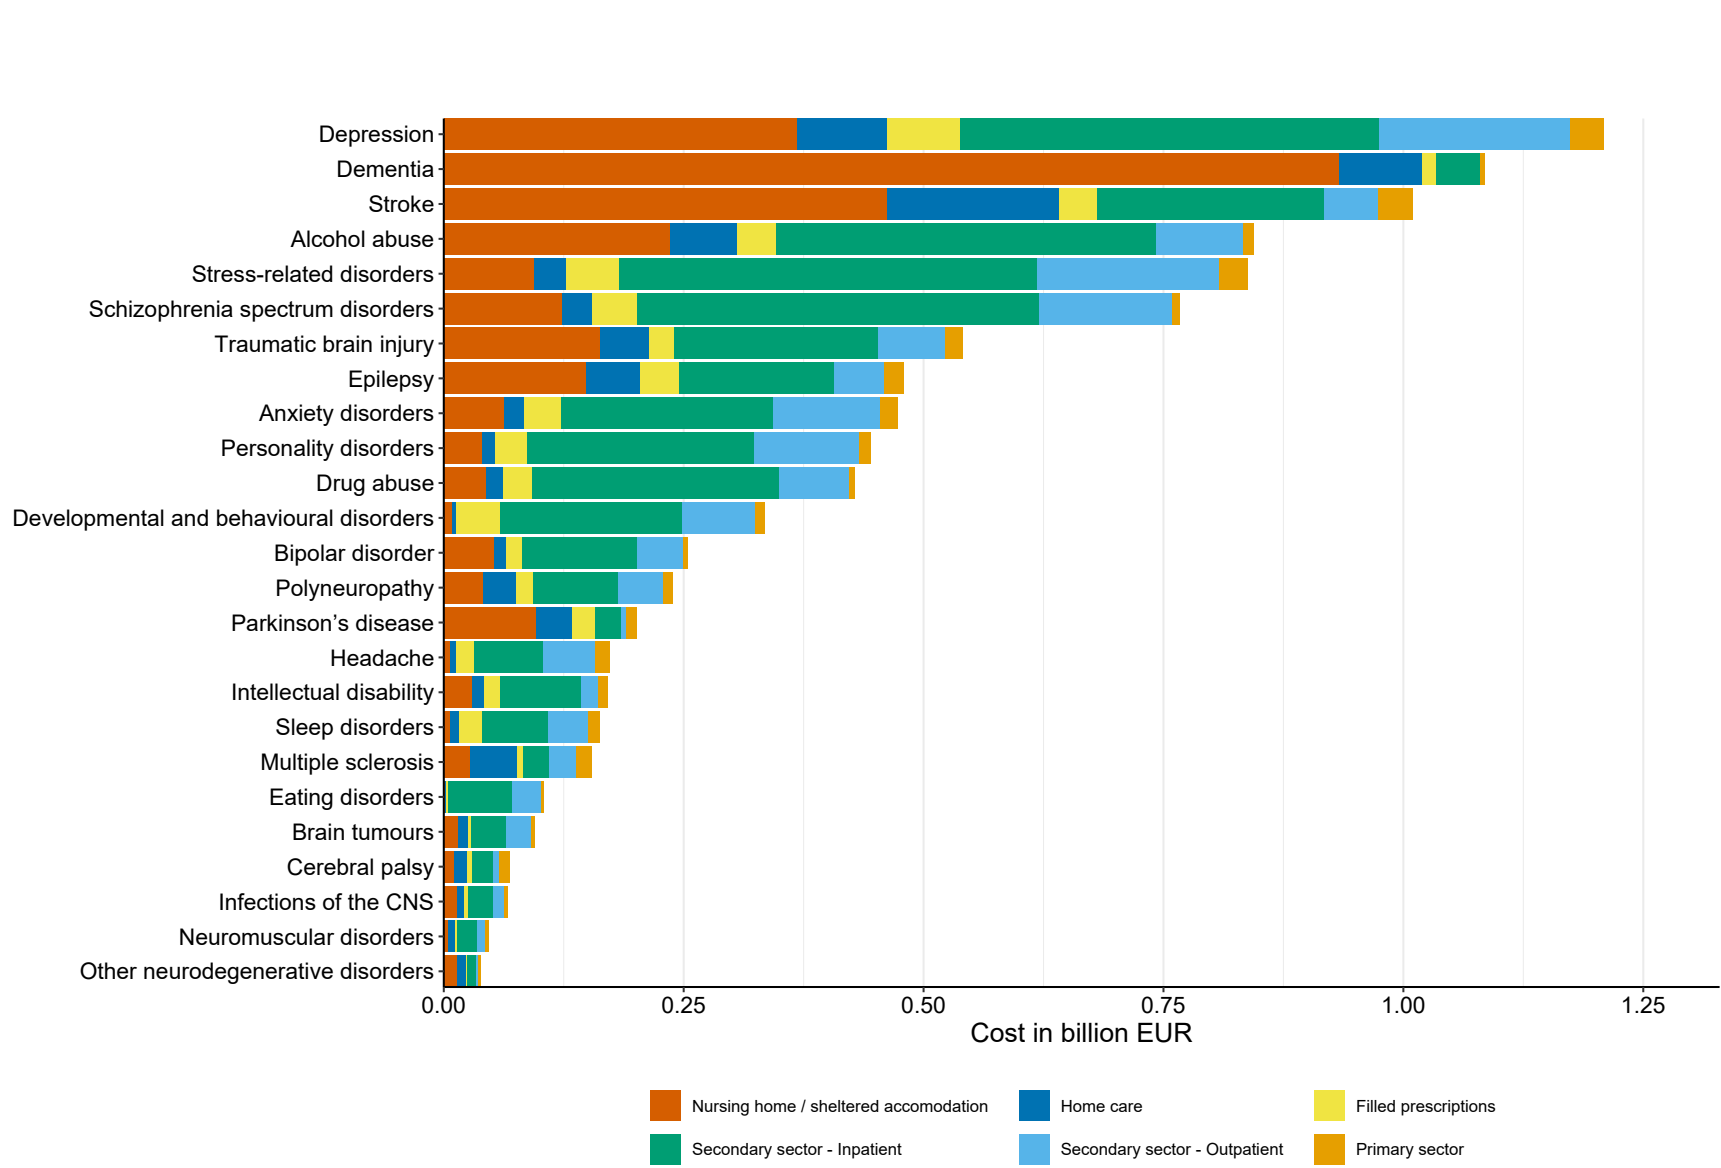

Figure 4: Total attributable direct costs in persons with prevalent brain disorders in Denmark in 2015 (in 2015 prices) sorted from highest to lowest costs.  
 Abbreviations: CNS, central nervous system

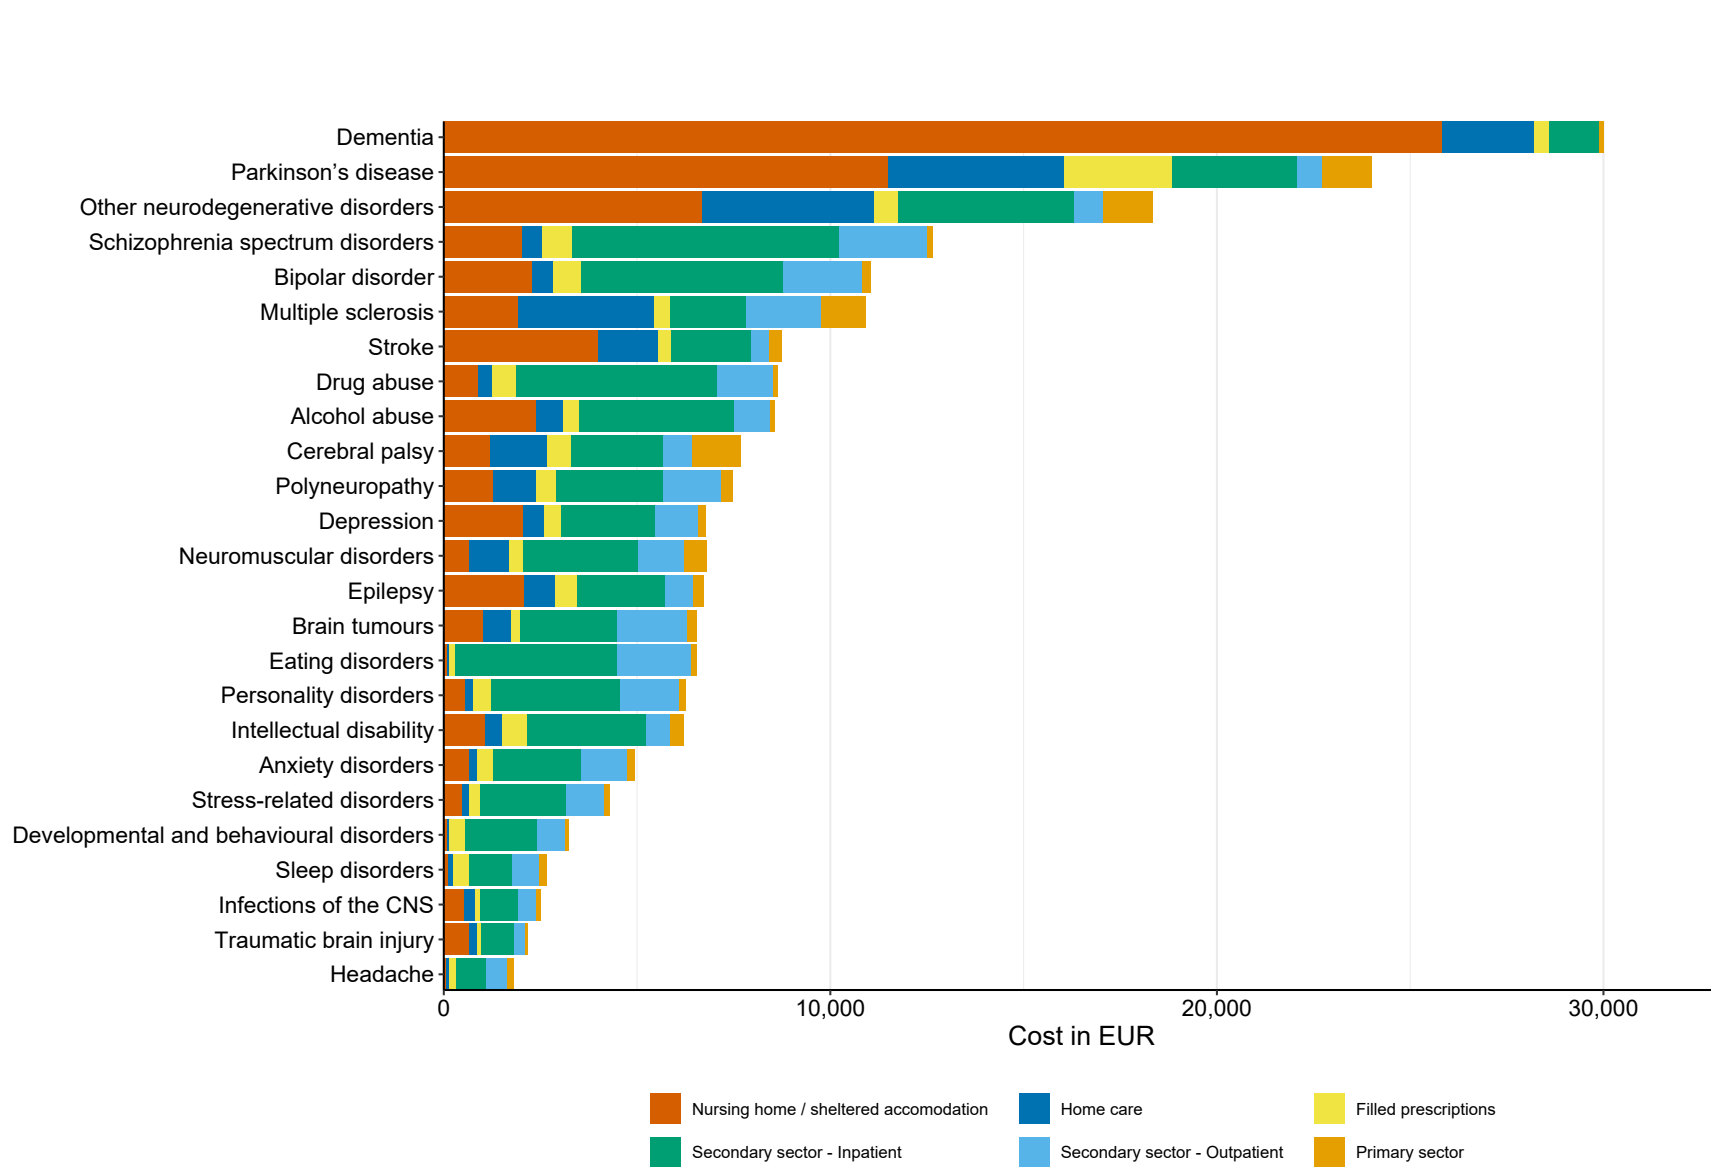

Figure 5: Attributable direct costs per person in individuals with prevalent brain disorders in Denmark in 2015 (in 2015 prices) sorted from highest to lowest costs.  
 Abbreviations: CNS, central nervous system

1  
2  
3  
4  
5  
6  
7  
8  
9  
10  
11  
12  
13  
14  
15  
16  
17  
18  
19  
20  
21  
22  
23  
24  
25  
26  
27  
28  
29  
30  
31  
32  
33  
34  
35  
36  
37  
38  
39  
40  
41  
42  
43  
44  
45  
46  
47

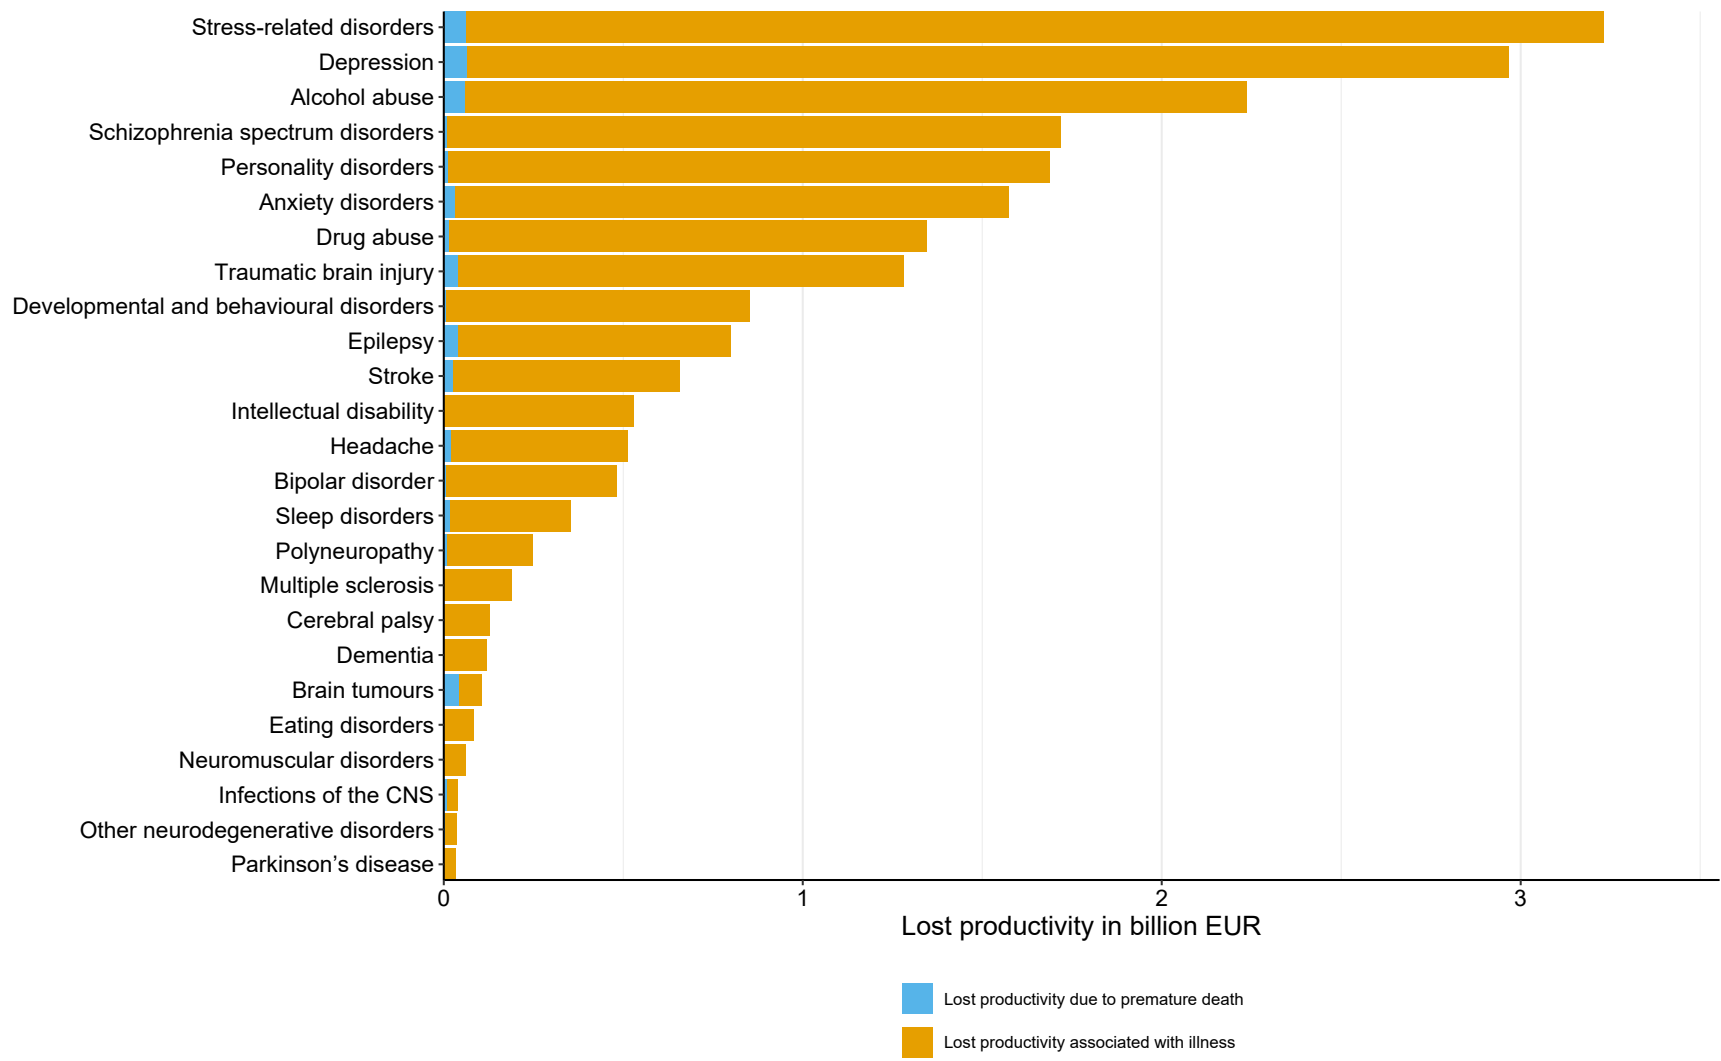

Figure 6: Total attributable indirect costs due to lost productivity in persons with prevalent brain disorders in Denmark in 2015 (in 2015 prices) sorted from highest to lowest costs. Abbreviations: CNS, central nervous system

## APPENDIX 1 – DATA SOURCES

From the Danish Civil Registration System (DCRS), we obtained personal identification numbers (*i.e.*, CPR-numbers, a unique 10-digit number for every Danish citizen given at birth or immigration) to identify individuals across the nationwide registries in both the healthcare and socioeconomic systems. Also, the DCRS holds information on date of birth, sex, vital status, and place of living, of every person in Denmark.<sup>1</sup>

The Danish National Patient Registry (DNPR) holds information on all in- and outpatient hospital contacts since 1995, with details about date of admission and discharge, procedures and operations, and one or more discharge diagnoses.<sup>2</sup> Similarly, all contacts to psychiatric hospitals are recorded in the Danish Psychiatric Central Research Registry, which since 1995 has been included in the DNPR. The discharge diagnoses are recorded using the International Classification of Diseases, Tenth Revision (ICD-10).<sup>3</sup> For every hospital contact, the accumulated costs of the services provided are reimbursed to the hospital department using national reimbursement rates/tariffs based on average costs of the services. Diagnosis-related group (DRG) tariffs are used for inpatient contacts and Danish Ambulatory Grouping System (DAGS) tariffs for outpatient contacts.<sup>4</sup>

The Danish Health Service Registry (DHSR) contains information on services provided by health contractors in primary health care covered by the national health services during consultations, telephone consultations, and home visits. Services are recorded from a wide range of health contractors such as general practitioners, dentists, physiotherapists, chiropodists, chiropractors, psychologists, and other specialists. Every service recorded in the DHSR is accompanied with a corresponding tariff used when the counties reimburse services to the health contractor.<sup>5</sup>

The Danish National Prescription Registry includes nationwide data on all prescriptions filled at outpatient pharmacies since 1995, *e.g.*, drug type, number of packages, package size, and price. Since 2004, indication of prescriptions are recorded, but with missing indication in one third of prescriptions filled. Drug types are classified according to the Anatomical Therapeutic Chemical (ATC) classification system.<sup>6</sup>

1  
2  
3  
4  
5  
6  
7  
8  
9  
10  
11  
12  
13  
14  
15  
16  
17  
18  
19  
20  
21  
22  
23  
24  
25  
26  
27  
28  
29  
30  
31  
32  
33  
34  
35  
36  
37  
38  
39  
40  
41  
42  
43  
44  
45  
46  
47  
48  
49  
50  
51  
52  
53  
54  
55  
56  
57  
58  
59  
60

Finally, Statistics Denmark hosts registries with information on every Danish resident on whether the person lives in an elderly home or nursery home, on exact time spent by public home help in private households (in hours), and on personal income before taxes.<sup>7</sup> Data on rehabilitation provided by municipalities were not available in any nationwide registry and therefore not included in our analyses.

For peer review only

## APPENDIX 2 – CODE BOOKS

### ICD-10 and ATC codes

In the main analyses, brain disorders were defined by the “Included diagnosis codes” excluding the codes in “Excluded diagnosis codes”. In the sensitivity analyses, brain disorders were defined by either “Included diagnosis codes” excluding the codes in “Excluded diagnosis codes” or by filled prescriptions including “Included ATC codes”. For The Anatomical Therapeutic Chemical (ATC) codes, if any indication codes are given, only prescriptions with those ATC and indication codes were used. Diagnosis codes are given as International Classification of Diseases, Tenth Revision (ICD-10) codes. For both ICD-10 and ATC codes, all subcodes were included.

| Brain disorder                           | Included diagnosis codes                                                                                   | Excluded diagnosis codes | Included ATC codes               | Included indication codes |
|------------------------------------------|------------------------------------------------------------------------------------------------------------|--------------------------|----------------------------------|---------------------------|
| Any brain disorder                       |                                                                                                            |                          |                                  |                           |
| Alcohol abuse                            | F10 E244 G312 G621 G721 I426 K292 K70 K852 K860 Q860                                                       | F100                     | V03AA<br>N07BB                   |                           |
| Anxiety disorders                        | F40 F41 F42                                                                                                |                          | N06A                             | 371 830 163               |
| Bipolar disorder                         | F30 F31                                                                                                    |                          | N05AN01                          |                           |
| Brain tumours                            | C70 C71 C72 D32 D33 D42 D43                                                                                |                          |                                  |                           |
| Cerebral palsy                           | G80                                                                                                        |                          |                                  |                           |
| Dementia                                 | F00 F01 F02 F03 G30 G310B G311 G318 G319                                                                   |                          | N06D                             | 330 331 329 838           |
| Depression                               | F32 F33                                                                                                    |                          | N06A                             | 168 270                   |
| Developmental and behavioural disorders  | F84 F9                                                                                                     | F99                      |                                  |                           |
| Drug abuse                               | F1                                                                                                         | F10 F17                  | N07BC01<br>N07BC51               |                           |
| Eating disorders                         | F500 F501 F502 F503                                                                                        |                          |                                  |                           |
| Epilepsy                                 | G40                                                                                                        |                          |                                  |                           |
| Headache                                 | G43 G44                                                                                                    |                          | N02C                             | 56 269 153                |
| Infections of the central nervous system | G0 A17 A321 A327 A390 A521 A522 A523 A692 A83 A84 A85 A87 A89 B003 B004 B010 B011 B020 B021 B582 B451 B375 | G08 G09                  |                                  |                           |
| Intellectual disability                  | F7 Q90 Q992                                                                                                |                          |                                  |                           |
| Multiple sclerosis                       | G35                                                                                                        |                          |                                  |                           |
| Neuromuscular disorders                  | G70 G71 G72 G73                                                                                            |                          |                                  |                           |
| Other neurodegenerative disorders        | G10 G11 G122G G13 G14                                                                                      | G130 G139                |                                  |                           |
| Parkinson’s disease                      | G20 G23                                                                                                    |                          | N04BA<br>N04BB<br>N04BD<br>N04BX |                           |
| Personality disorders                    | F60                                                                                                        |                          |                                  |                           |
| Polyneuropathy                           | G60 G61 G62 G63 G64 G130                                                                                   |                          |                                  |                           |
| Schizophrenia spectrum disorders         | F2                                                                                                         |                          |                                  |                           |
| Sleep disorders                          | F51 G470 G471 G473 G474                                                                                    |                          | N05CF01<br>N05CH01               | 372 165 166 373<br>170    |
| Stress-related disorders                 | F43                                                                                                        |                          |                                  |                           |
| Stroke                                   | I60 I61 I63 I64                                                                                            | I608                     |                                  |                           |
| Traumatic brain injury                   | S020 S021 S027 S029 S06                                                                                    |                          |                                  |                           |



## Charlson Comorbidity Index (CCI)

The codes included were used to identify comorbidity in persons with brain disorders and their comparisons. Persons were considered having the specific type of comorbidity when having at least one of the listed discharge diagnosis codes (including all subcodes) recorded in the Danish National Patient Registry up to 10 years before index date.

| CCI disease                       | Included ICD-8 and ICD-10 diagnosis codes                                                                                                                       |
|-----------------------------------|-----------------------------------------------------------------------------------------------------------------------------------------------------------------|
| Myocardial infarction             | 410 DI21 DI22 DI23                                                                                                                                              |
| Congestive heart failure          | 42709 42710 42711 42719 42899 78249 DI50 DI110 DI130 DI132                                                                                                      |
| Peripheral vascular disease       | 440 441 442 443 444 445 DI70 DI71 DI72 DI73 DI74 DI77                                                                                                           |
| Cerebrovascular disease           | 430 431 432 433 434 435 436 437 438 DI6 DG45 DG46                                                                                                               |
| Dementia                          | 29009 2901 29309 DF00 DF01 DF02 DF03 DF051 DG30                                                                                                                 |
| Chronic pulmonary disease         | 490 491 492 493 515 516 517 518 DJ40 DJ41 DJ42 DJ43 DJ44 DJ45 DJ46 DJ47 DJ60 DJ61 DJ62 DJ63 DJ64 DJ65 DJ66 DJ67 DJ684 DJ701 DJ703 DJ841 DJ920 DJ961 DJ982 DJ983 |
| Connective tissue disease         | 712 716 734 446 13599 DM05 DM06 DM08 DM09 DM30 DM31 DM32 DM33 DM34 DM35 DM36 DD86                                                                               |
| Ulcer disease                     | 53091 53098 531 532 533 534 DK221 DK25 DK26 DK27 DK28                                                                                                           |
| Mild liver disease                | 571 57301 57304 DB18 DK700 DK701 DK702 DK703 DK709 DK71 DK73 DK74 DK760                                                                                         |
| Diabetes without end-organ damage | 24900 24906 24907 24909 25000 25006 25007 25009 DE100 DE101 DE109 DE110 DE111 DE119                                                                             |
| Hemiplegia                        | 344 DG81 DG82                                                                                                                                                   |
| Moderate to severe renal disease  | 403 404 580 581 582 583 584 59009 59319 7531 792 DI12 DI13 DN00 DN01 DN02 DN03 DN04 DN05 DN07 DN11 DN14 DN17 DN18 DN19 DQ61                                     |
| Diabetes with end-organ damage    | 24901 24902 24903 24904 24905 24908 25001 25002 25003 25004 25005 25008 DE102 DE103 DE104 DE105 DE106 DE107 DE108 DE112 DE113 DE114 DE115 DE116 DE117 DE118     |
| Solid cancer tumour               | 14 15 16 17 18 190 191 192 193 194 DC0 DC1 DC2 DC3 DC4 DC5 DC6 DC70 DC71 DC72 DC73 DC74 DC75                                                                    |
| Leukaemia                         | 204 205 206 207 DC91 DC92 DC93 DC94 DC95                                                                                                                        |
| Lymphoma                          | 200 201 202 203 27559 DC81 DC82 DC83 DC84 DC85 DC88 DC90 DC96                                                                                                   |
| Moderate to severe liver disease  | 07000 07002 07004 07006 07008 57300 4560 DB150 DB160 DB162 DB190 DK704 DK72 DK766 DI85                                                                          |
| Metastatic solid tumour           | 195 196 197 198 199 DC76 DC77 DC78 DC79 DC80                                                                                                                    |
| AIDS                              | 07983 DB21 DB22 DB23 DB24                                                                                                                                       |

## Supplementary tables

Suppl. Table 1. Characteristics of patients with prevalent disorders in Denmark in 2015 sorted in alphabetical order.

| Disease group                            | Prevalent cohorts: 2015 |                |                     |                |                 |                |
|------------------------------------------|-------------------------|----------------|---------------------|----------------|-----------------|----------------|
|                                          | Persons, N              | Men, N (%)     | Age, median (Q1-Q3) | CCI: 0, N (%)  | CCI: 1-2, N (%) | CCI: +3, N (%) |
| Any brain disorder                       | 1,075,081               | 536,462 (49.9) | 46.0 (27.5-63.6)    | 788,948 (73.4) | 222,453 (20.7)  | 63,680 (5.9)   |
| Alcohol abuse                            | 101,066                 | 67,376 (66.7)  | 56.5 (46.2-65.8)    | 59,961 (59.3)  | 28,397 (28.1)   | 12,708 (12.6)  |
| Anxiety disorders                        | 96,943                  | 33,768 (34.8)  | 41.2 (28.8-54.3)    | 78,009 (80.5)  | 15,181 (15.7)   | 3,753 (3.9)    |
| Bipolar disorder                         | 23,364                  | 9,366 (40.1)   | 52.4 (39.3-64.9)    | 17,127 (73.3)  | 4,851 (20.8)    | 1,386 (5.9)    |
| Brain tumours                            | 14,953                  | 6,101 (40.8)   | 62.6 (48.6-71.9)    | 8,718 (58.3)   | 4,339 (29.0)    | 1,896 (12.7)   |
| Cerebral palsy                           | 9,083                   | 5,093 (56.1)   | 22.3 (14.1-37.0)    | 6,516 (71.7)   | 2,092 (23.0)    | 475 (5.2)      |
| Dementia                                 | 40,037                  | 15,645 (39.1)  | 81.7 (73.9-87.5)    | 8,340 (20.8)   | 22,655 (56.6)   | 9,042 (22.6)   |
| Depression                               | 180,886                 | 64,191 (35.5)  | 49.0 (35.6-64.1)    | 130,862 (72.3) | 38,342 (21.2)   | 11,682 (6.5)   |
| Developmental and behavioural disorders  | 103,157                 | 68,589 (66.5)  | 19.6 (14.2-26.0)    | 94,745 (91.8)  | 7,841 (7.6)     | 571 (0.6)      |
| Drug abuse                               | 50,066                  | 32,295 (64.5)  | 38.6 (28.4-50.8)    | 38,657 (77.2)  | 9,180 (18.3)    | 2,229 (4.5)    |
| Eating disorders                         | 15,936                  | 750 (4.7)      | 29.5 (23.0-36.9)    | 14,484 (90.9)  | 1,332 (8.4)     | 120 (0.8)      |
| Epilepsy                                 | 72,205                  | 37,047 (51.3)  | 43.5 (24.8-62.1)    | 51,701 (71.6)  | 15,562 (21.6)   | 4,942 (6.8)    |
| Headache                                 | 96,252                  | 32,218 (33.5)  | 45.4 (31.2-57.6)    | 75,439 (78.4)  | 17,566 (18.3)   | 3,247 (3.4)    |
| Infections of the central nervous system | 26,829                  | 14,069 (52.4)  | 43.1 (22.9-61.5)    | 20,740 (77.3)  | 4,709 (17.6)    | 1,380 (5.1)    |
| Intellectual disability                  | 27,605                  | 16,087 (58.3)  | 25.4 (17.1-45.1)    | 23,577 (85.4)  | 3,501 (12.7)    | 527 (1.9)      |
| Multiple sclerosis                       | 14,264                  | 4,431 (31.1)   | 52.6 (42.9-62.7)    | 11,206 (78.6)  | 2,559 (17.9)    | 499 (3.5)      |
| Neuromuscular disorders                  | 7,080                   | 3,649 (51.5)   | 51.4 (33.3-66.5)    | 4,427 (62.5)   | 1,992 (28.1)    | 661 (9.3)      |
| Other neurodegenerative disorders        | 2,192                   | 1,143 (52.1)   | 59.9 (46.2-70.5)    | 1,381 (63.0)   | 622 (28.4)      | 189 (8.6)      |
| Parkinson's disease                      | 8,942                   | 5,083 (56.8)   | 75.3 (68.4-81.4)    | 4,430 (49.5)   | 3,323 (37.2)    | 1,189 (13.3)   |
| Personality disorders                    | 71,334                  | 24,517 (34.4)  | 39.9 (30.6-51.0)    | 58,516 (82.0)  | 10,824 (15.2)   | 1,994 (2.8)    |
| Polyneuropathy                           | 32,710                  | 18,918 (57.8)  | 66.7 (55.0-75.8)    | 15,900 (48.6)  | 11,139 (34.1)   | 5,671 (17.3)   |
| Schizophrenia spectrum disorders         | 61,346                  | 32,637 (53.2)  | 45.1 (32.1-57.7)    | 48,640 (79.3)  | 10,276 (16.8)   | 2,430 (4.0)    |
| Sleep disorders                          | 61,666                  | 45,042 (73.0)  | 55.9 (43.0-66.2)    | 41,909 (68.0)  | 15,223 (24.7)   | 4,534 (7.4)    |
| Stress-related disorders                 | 196,291                 | 77,494 (39.5)  | 42.3 (29.3-54.1)    | 158,789 (80.9) | 31,138 (15.9)   | 6,364 (3.2)    |
| Stroke                                   | 120,065                 | 64,067 (53.4)  | 71.0 (61.1-79.9)    | 23,651 (19.7)  | 70,389 (58.6)   | 26,025 (21.7)  |
| Traumatic brain injury                   | 249,348                 | 142,776 (57.3) | 34.9 (22.1-53.4)    | 207,314 (83.1) | 34,162 (13.7)   | 7,872 (3.2)    |

Abbreviations: Q, quartile; CCI, Charlson Comorbidity Index.

**Suppl. Table 2. Characteristics of patients with incident brain disorders in Denmark during 2011-2015 sorted in alphabetical order.**

| Disease group                            | Incident cohorts: 2011-2015 |                |                     |                |                 |                |
|------------------------------------------|-----------------------------|----------------|---------------------|----------------|-----------------|----------------|
|                                          | Persons, N                  | Men, N (%)     | Age, median (Q1-Q3) | CCI: 0, N (%)  | CCI: 1-2, N (%) | CCI: +3, N (%) |
| Any brain disorder                       | 381,759                     | 187,780 (49.2) | 46.6 (21.5-68.9)    | 295,560 (77.4) | 64,746 (17.0)   | 21,453 (5.6)   |
| Alcohol abuse                            | 37,032                      | 25,251 (68.2)  | 55.8 (42.7-66.8)    | 25,797 (69.7)  | 8,347 (22.5)    | 2,888 (7.8)    |
| Anxiety disorders                        | 53,350                      | 20,013 (37.5)  | 35.8 (22.3-56.5)    | 39,034 (73.2)  | 8,480 (15.9)    | 5,836 (10.9)   |
| Bipolar disorder                         | 9,838                       | 4,074 (41.4)   | 40.8 (28.5-55.0)    | 7,951 (80.8)   | 1,500 (15.2)    | 387 (3.9)      |
| Brain tumours                            | 9,336                       | 4,199 (45.0)   | 64.1 (50.7-72.9)    | 6,044 (64.7)   | 2,227 (23.9)    | 1,065 (11.4)   |
| Cerebral palsy                           | 2,145                       | 1,199 (55.9)   | 13.7 (3.1-54.3)     | 1,371 (63.9)   | 582 (27.1)      | 192 (9.0)      |
| Dementia                                 | 42,798                      | 17,454 (40.8)  | 81.8 (75.4-87.0)    | 21,015 (49.1)  | 15,686 (36.7)   | 6,097 (14.2)   |
| Depression                               | 78,926                      | 29,379 (37.2)  | 45.4 (27.9-66.8)    | 56,768 (71.9)  | 15,445 (19.6)   | 6,713 (8.5)    |
| Developmental and behavioural disorders  | 48,562                      | 29,864 (61.5)  | 14.1 (8.6-21.9)     | 43,747 (90.1)  | 4,445 (9.2)     | 370 (0.8)      |
| Drug abuse                               | 18,843                      | 12,469 (66.2)  | 26.9 (20.7-42.3)    | 15,944 (84.6)  | 2,322 (12.3)    | 577 (3.1)      |
| Eating disorders                         | 6,011                       | 321 (5.3)      | 19.7 (16.0-24.9)    | 5,683 (94.5)   | 307 (5.1)       | 21 (0.3)       |
| Epilepsy                                 | 21,255                      | 11,301 (53.2)  | 53.2 (21.1-70.6)    | 12,057 (56.7)  | 6,319 (29.7)    | 2,879 (13.5)   |
| Headache                                 | 35,180                      | 11,547 (32.8)  | 37.6 (23.4-50.4)    | 29,066 (82.6)  | 5,292 (15.0)    | 822 (2.3)      |
| Infections of the central nervous system | 9,501                       | 4,922 (51.8)   | 44.6 (21.9-64.2)    | 7,086 (74.6)   | 1,727 (18.2)    | 688 (7.2)      |
| Intellectual disability                  | 8,166                       | 4,692 (57.5)   | 17.3 (9.9-34.8)     | 7,035 (86.1)   | 994 (12.2)      | 137 (1.7)      |
| Multiple sclerosis                       | 3,345                       | 1,070 (32.0)   | 41.7 (31.9-52.0)    | 2,833 (84.7)   | 449 (13.4)      | 63 (1.9)       |
| Neuromuscular disorders                  | 3,062                       | 1,596 (52.1)   | 52.8 (32.9-67.8)    | 1,950 (63.7)   | 803 (26.2)      | 309 (10.1)     |
| Other neurodegenerative disorders        | 1,464                       | 777 (53.1)     | 65.3 (53.1-73.2)    | 904 (61.7)     | 425 (29.0)      | 135 (9.2)      |
| Parkinson's disease                      | 6,478                       | 3,883 (59.9)   | 75.5 (68.9-81.4)    | 3,459 (53.4)   | 2,236 (34.5)    | 783 (12.1)     |
| Personality disorders                    | 21,556                      | 6,762 (31.4)   | 27.2 (21.3-38.6)    | 19,265 (89.4)  | 2,030 (9.4)     | 261 (1.2)      |
| Polyneuropathy                           | 17,925                      | 10,755 (60.0)  | 65.9 (54.5-75.0)    | 8,825 (49.2)   | 6,108 (34.1)    | 2,992 (16.7)   |
| Schizophrenia spectrum disorders         | 19,316                      | 10,219 (52.9)  | 29.7 (21.1-48.9)    | 16,209 (83.9)  | 2,483 (12.9)    | 624 (3.2)      |
| Sleep disorders                          | 31,316                      | 21,769 (69.5)  | 51.9 (38.5-62.7)    | 21,974 (70.2)  | 7,086 (22.6)    | 2,256 (7.2)    |
| Stress-related disorders                 | 80,953                      | 34,110 (42.1)  | 34.5 (20.5-48.5)    | 68,431 (84.5)  | 10,356 (12.8)   | 2,166 (2.7)    |
| Stroke                                   | 67,539                      | 35,308 (52.3)  | 71.8 (61.1-81.3)    | 37,862 (56.1)  | 21,220 (31.4)   | 8,457 (12.5)   |
| Traumatic brain injury                   | 64,931                      | 35,456 (54.6)  | 34.3 (15.7-63.4)    | 50,924 (78.4)  | 10,610 (16.3)   | 3,397 (5.2)    |

Abbreviations: Q, quartile; CCI, Charlson Comorbidity Index.

**Suppl. Table 3. Occurrence of hospital-diagnosed brain disorders in the Danish population including incidence during 2011-2015 and prevalence in 2015 sorted in alphabetical order.**

| Disease group                            | Prevalent cohorts: 2015 |                                         | Incident cohorts: 2011-2015 |                                                  |
|------------------------------------------|-------------------------|-----------------------------------------|-----------------------------|--------------------------------------------------|
|                                          | Prevalence, N (%)       | Prevalence per 100,000 persons (95% CI) | Incidence, N                | Incidence rate per 100,000 person-years (95% CI) |
| Any brain disorder                       | 1,075,081 (18.9)        | 18,879 (18,844-18,915)                  | 381,759                     | 1,349 (1,345-1,353)                              |
| Alcohol abuse                            | 101,066 (1.8)           | 1,775 (1,764-1,786)                     | 37,032                      | 131 (130-132)                                    |
| Anxiety disorders                        | 96,943 (1.7)            | 1,702 (1,692-1,713)                     | 53,350                      | 189 (187-190)                                    |
| Bipolar disorder                         | 23,364 (0.4)            | 410 (405-416)                           | 9,838                       | 35 (34-35)                                       |
| Brain tumours                            | 14,953 (0.3)            | 263 (258-267)                           | 9,336                       | 33 (32-34)                                       |
| Cerebral palsy                           | 9,083 (0.2)             | 160 (156-163)                           | 2,145                       | 8 (7-8)                                          |
| Dementia                                 | 40,037 (0.7)            | 703 (696-710)                           | 42,798                      | 151 (150-153)                                    |
| Depression                               | 180,886 (3.2)           | 3,176 (3,162-3,191)                     | 78,926                      | 279 (277-281)                                    |
| Developmental and behavioural disorders  | 103,157 (1.8)           | 1,812 (1,800-1,823)                     | 48,562                      | 172 (170-173)                                    |
| Drug abuse                               | 50,066 (0.9)            | 879 (872-887)                           | 18,843                      | 67 (66-68)                                       |
| Eating disorders                         | 15,936 (0.3)            | 280 (276-284)                           | 6,011                       | 21 (21-22)                                       |
| Epilepsy                                 | 72,205 (1.3)            | 1,268 (1,259-1,277)                     | 21,255                      | 75 (74-76)                                       |
| Headache                                 | 96,252 (1.7)            | 1,690 (1,680-1,701)                     | 35,180                      | 124 (123-126)                                    |
| Infections of the central nervous system | 26,829 (0.5)            | 471 (466-477)                           | 9,501                       | 34 (33-34)                                       |
| Intellectual disability                  | 27,605 (0.5)            | 485 (479-491)                           | 8,166                       | 29 (28-29)                                       |
| Multiple sclerosis                       | 14,264 (0.3)            | 250 (246-255)                           | 3,345                       | 12 (11-12)                                       |
| Neuromuscular disorders                  | 7,080 (0.1)             | 124 (121-127)                           | 3,062                       | 11 (10-11)                                       |
| Other neurodegenerative disorders        | 2,192 (0.0)             | 38 (37-40)                              | 1,464                       | 5 (5-5)                                          |
| Parkinson's disease                      | 8,942 (0.2)             | 157 (154-160)                           | 6,478                       | 23 (22-23)                                       |
| Personality disorders                    | 71,334 (1.3)            | 1,253 (1,244-1,262)                     | 21,556                      | 76 (75-77)                                       |
| Polyneuropathy                           | 32,710 (0.6)            | 574 (568-581)                           | 17,925                      | 63 (62-64)                                       |
| Schizophrenia spectrum disorders         | 61,346 (1.1)            | 1,077 (1,069-1,086)                     | 19,316                      | 68 (67-69)                                       |
| Sleep disorders                          | 61,666 (1.1)            | 1,083 (1,074-1,091)                     | 31,316                      | 111 (109-112)                                    |
| Stress-related disorders                 | 196,291 (3.4)           | 3,447 (3,432-3,462)                     | 80,953                      | 286 (284-288)                                    |
| Stroke                                   | 120,065 (2.1)           | 2,108 (2,097-2,120)                     | 67,539                      | 239 (237-240)                                    |
| Traumatic brain injury                   | 249,348 (4.4)           | 4,379 (4,362-4,396)                     | 64,931                      | 229 (228-231)                                    |

Abbreviations: CI, confidence interval.

**Suppl. Table 4. Actual and attributable costs in total and per person in persons with prevalent brain disorders in 2015, and incident brain disorders during 2011-2015 sorted in alphabetical order and stratified by cost components.**

| Brain disorder     | Cost component                         | Prevalent cohort - 2015    |                                       |                                  |                                             | Incident cohort - 2011-2015                                           |
|--------------------|----------------------------------------|----------------------------|---------------------------------------|----------------------------------|---------------------------------------------|-----------------------------------------------------------------------|
|                    |                                        | Actual costs in 2015 (EUR) | Actual costs per person in 2015 (EUR) | Attributable costs in 2015 (EUR) | Attributable costs per person in 2015 (EUR) | Attributable costs per person in the first year after diagnosis (EUR) |
| Any brain disorder | Primary sector                         | 488,168,143                | 460                                   | 191,774,339                      | 181                                         | 175                                                                   |
|                    | Secondary sector - Outpatient          | 1,491,081,458              | 1,406                                 | 743,338,257                      | 701                                         | 2,702                                                                 |
|                    | Secondary sector - Inpatient           | 2,522,910,114              | 2,379                                 | 1,638,312,025                    | 1,545                                       | 8,457                                                                 |
|                    | Filled prescriptions                   | 533,852,195                | 503                                   | 319,922,005                      | 302                                         | 211                                                                   |
|                    | Home care                              | 700,068,647                | 660                                   | 529,492,180                      | 499                                         | 489                                                                   |
|                    | Nursing home / sheltered accommodation | 2,138,655,226              | 2,017                                 | 1,786,588,544                    | 1,685                                       | 749                                                                   |
|                    | Total cost (excl. lost productivity)   | 7,874,735,782              | 7,426                                 | 5,209,427,352                    | 4,912                                       | 12,783                                                                |
| Alcohol abuse      | Primary sector                         | 43,832,697                 | 444                                   | 10,708,496                       | 109                                         | 164                                                                   |
|                    | Secondary sector - Outpatient          | 182,619,411                | 1,851                                 | 90,265,391                       | 915                                         | 2,318                                                                 |
|                    | Secondary sector - Inpatient           | 509,785,016                | 5,166                                 | 396,078,314                      | 4,014                                       | 14,252                                                                |
|                    | Filled prescriptions                   | 70,574,116                 | 715                                   | 41,364,956                       | 419                                         | 329                                                                   |
|                    | Home care                              | 86,902,799                 | 881                                   | 69,319,977                       | 703                                         | 686                                                                   |
|                    | Nursing home / sheltered accommodation | 272,375,227                | 2,760                                 | 235,944,141                      | 2,391                                       | 1,019                                                                 |
|                    | Total cost (excl. lost productivity)   | 1,166,089,265              | 11,817                                | 843,681,275                      | 8,550                                       | 18,768                                                                |
| Anxiety disorders  | Primary sector                         | 46,880,525                 | 488                                   | 17,760,012                       | 185                                         | 270                                                                   |
|                    | Secondary sector - Outpatient          | 186,143,973                | 1,939                                 | 112,251,855                      | 1,169                                       | 4,937                                                                 |
|                    | Secondary sector - Inpatient           | 304,572,473                | 3,172                                 | 220,690,805                      | 2,298                                       | 8,872                                                                 |
|                    | Filled prescriptions                   | 58,721,973                 | 612                                   | 38,187,658                       | 398                                         | 502                                                                   |
|                    | Home care                              | 32,889,132                 | 343                                   | 20,728,003                       | 216                                         | 359                                                                   |
|                    | Nursing home / sheltered accommodation | 93,491,816                 | 974                                   | 63,280,196                       | 659                                         | 368                                                                   |
|                    | Total cost (excl. lost productivity)   | 722,699,890                | 7,527                                 | 472,898,530                      | 4,925                                       | 15,308                                                                |
| Bipolar disorder   | Primary sector                         | 12,927,768                 | 561                                   | 4,802,917                        | 209                                         | 227                                                                   |
|                    | Secondary sector - Outpatient          | 68,871,491                 | 2,990                                 | 47,030,959                       | 2,042                                       | 6,368                                                                 |
|                    | Secondary sector - Inpatient           | 147,299,161                | 6,395                                 | 120,588,736                      | 5,235                                       | 17,468                                                                |
|                    | Filled prescriptions                   | 23,251,036                 | 1,009                                 | 16,487,361                       | 716                                         | 755                                                                   |
|                    | Home care                              | 17,966,005                 | 780                                   | 12,684,093                       | 551                                         | 299                                                                   |
|                    | Nursing home / sheltered accommodation | 65,937,773                 | 2,863                                 | 52,520,523                       | 2,280                                       | 680                                                                   |
|                    | Total cost (excl. lost productivity)   | 336,253,233                | 14,598                                | 254,114,589                      | 11,032                                      | 25,797                                                                |
| Brain tumours      | Primary sector                         | 9,283,859                  | 640                                   | 3,508,912                        | 242                                         | 223                                                                   |
|                    | Secondary sector - Outpatient          | 42,180,950                 | 2,910                                 | 26,480,502                       | 1,827                                       | 12,604                                                                |

|                                         |                                        | Prevalent cohort - 2015    |                                       |                                  |                                             | Incident cohort - 2011-2015                                           |
|-----------------------------------------|----------------------------------------|----------------------------|---------------------------------------|----------------------------------|---------------------------------------------|-----------------------------------------------------------------------|
| Brain disorder                          | Cost component                         | Actual costs in 2015 (EUR) | Actual costs per person in 2015 (EUR) | Attributable costs in 2015 (EUR) | Attributable costs per person in 2015 (EUR) | Attributable costs per person in the first year after diagnosis (EUR) |
|                                         | Secondary sector - Inpatient           | 57,321,123                 | 3,954                                 | 36,118,409                       | 2,492                                       | 29,223                                                                |
|                                         | Filled prescriptions                   | 8,861,608                  | 611                                   | 3,527,159                        | 243                                         | 295                                                                   |
|                                         | Home care                              | 16,473,487                 | 1,136                                 | 10,430,046                       | 720                                         | 901                                                                   |
|                                         | Nursing home / sheltered accommodation | 31,261,211                 | 2,157                                 | 14,864,894                       | 1,025                                       | 302                                                                   |
|                                         | Total cost (excl. lost productivity)   | 165,382,238                | 11,409                                | 94,929,922                       | 6,549                                       | 43,548                                                                |
| Cerebral palsy                          | Primary sector                         | 13,167,622                 | 1,462                                 | 11,318,548                       | 1,256                                       | 960                                                                   |
|                                         | Secondary sector - Outpatient          | 11,430,545                 | 1,269                                 | 6,723,166                        | 746                                         | 2,731                                                                 |
|                                         | Secondary sector - Inpatient           | 27,487,812                 | 3,051                                 | 21,438,091                       | 2,380                                       | 11,838                                                                |
|                                         | Filled prescriptions                   | 6,630,687                  | 736                                   | 5,437,246                        | 604                                         | 567                                                                   |
|                                         | Home care                              | 13,763,599                 | 1,528                                 | 13,328,070                       | 1,479                                       | 2,111                                                                 |
|                                         | Nursing home / sheltered accommodation | 11,864,848                 | 1,317                                 | 10,870,651                       | 1,207                                       | 3,193                                                                 |
|                                         | Total cost (excl. lost productivity)   | 84,345,114                 | 9,363                                 | 69,115,771                       | 7,672                                       | 21,400                                                                |
| Dementia                                | Primary sector                         | 24,098,562                 | 667                                   | 4,596,178                        | 127                                         | 137                                                                   |
|                                         | Secondary sector - Outpatient          | 43,138,878                 | 1,193                                 | -5,214,136                       | -144                                        | 1,567                                                                 |
|                                         | Secondary sector - Inpatient           | 140,689,111                | 3,891                                 | 46,270,459                       | 1,280                                       | 6,237                                                                 |
|                                         | Filled prescriptions                   | 35,544,655                 | 983                                   | 14,366,512                       | 397                                         | 458                                                                   |
|                                         | Home care                              | 148,296,718                | 4,102                                 | 85,823,645                       | 2,374                                       | 3,175                                                                 |
|                                         | Nursing home / sheltered accommodation | 1,079,664,024              | 29,862                                | 933,749,795                      | 25,826                                      | 10,891                                                                |
|                                         | Total cost (excl. lost productivity)   | 1,471,431,949              | 40,698                                | 1,079,592,452                    | 29,860                                      | 22,465                                                                |
| Depression                              | Primary sector                         | 95,893,225                 | 539                                   | 34,953,943                       | 196                                         | 294                                                                   |
|                                         | Secondary sector - Outpatient          | 353,092,962                | 1,983                                 | 198,404,020                      | 1,115                                       | 4,415                                                                 |
|                                         | Secondary sector - Inpatient           | 632,094,332                | 3,551                                 | 437,349,885                      | 2,457                                       | 11,336                                                                |
|                                         | Filled prescriptions                   | 123,586,689                | 694                                   | 75,514,229                       | 424                                         | 447                                                                   |
|                                         | Home care                              | 147,797,688                | 830                                   | 94,735,383                       | 532                                         | 817                                                                   |
|                                         | Nursing home / sheltered accommodation | 510,771,406                | 2,869                                 | 367,705,421                      | 2,066                                       | 1,275                                                                 |
|                                         | Total cost (excl. lost productivity)   | 1,863,236,302              | 10,466                                | 1,208,662,881                    | 6,789                                       | 18,584                                                                |
| Developmental and behavioural disorders | Primary sector                         | 27,337,787                 | 266                                   | 10,369,345                       | 101                                         | 104                                                                   |
|                                         | Secondary sector - Outpatient          | 116,363,305                | 1,130                                 | 75,097,169                       | 729                                         | 3,890                                                                 |
|                                         | Secondary sector - Inpatient           | 236,746,401                | 2,299                                 | 190,215,735                      | 1,847                                       | 5,695                                                                 |
|                                         | Filled prescriptions                   | 53,648,059                 | 521                                   | 45,268,384                       | 440                                         | 477                                                                   |
|                                         | Home care                              | 5,642,767                  | 55                                    | 4,450,425                        | 43                                          | 28                                                                    |
|                                         | Nursing home / sheltered accommodation | 11,467,658                 | 111                                   | 8,904,950                        | 86                                          | 39                                                                    |

| Brain disorder                           | Cost component                         | Prevalent cohort - 2015    |                                       |                                  |                                             | Incident cohort - 2011-2015                                           |
|------------------------------------------|----------------------------------------|----------------------------|---------------------------------------|----------------------------------|---------------------------------------------|-----------------------------------------------------------------------|
|                                          |                                        | Actual costs in 2015 (EUR) | Actual costs per person in 2015 (EUR) | Attributable costs in 2015 (EUR) | Attributable costs per person in 2015 (EUR) | Attributable costs per person in the first year after diagnosis (EUR) |
|                                          | Total cost (excl. lost productivity)   | 451,205,976                | 4,382                                 | 334,306,007                      | 3,247                                       | 10,235                                                                |
| Drug abuse                               | Primary sector                         | 18,789,575                 | 379                                   | 6,103,985                        | 123                                         | 173                                                                   |
|                                          | Secondary sector - Outpatient          | 104,455,802                | 2,110                                 | 71,938,513                       | 1,453                                       | 3,539                                                                 |
|                                          | Secondary sector - Inpatient           | 294,331,957                | 5,944                                 | 257,849,075                      | 5,207                                       | 14,939                                                                |
|                                          | Filled prescriptions                   | 39,585,700                 | 799                                   | 30,697,450                       | 620                                         | 525                                                                   |
|                                          | Home care                              | 21,420,415                 | 433                                   | 17,004,322                       | 343                                         | 320                                                                   |
|                                          | Nursing home / sheltered accommodation | 55,090,031                 | 1,113                                 | 44,708,406                       | 903                                         | 324                                                                   |
|                                          | Total cost (excl. lost productivity)   | 533,673,480                | 10,778                                | 428,301,752                      | 8,650                                       | 19,820                                                                |
| Eating disorders                         | Primary sector                         | 6,954,226                  | 438                                   | 2,231,551                        | 141                                         | 112                                                                   |
|                                          | Secondary sector - Outpatient          | 41,617,887                 | 2,621                                 | 30,089,653                       | 1,895                                       | 8,660                                                                 |
|                                          | Secondary sector - Inpatient           | 78,974,413                 | 4,973                                 | 66,777,164                       | 4,205                                       | 21,099                                                                |
|                                          | Filled prescriptions                   | 5,121,915                  | 323                                   | 2,656,004                        | 167                                         | 108                                                                   |
|                                          | Home care                              | 1,027,908                  | 65                                    | 768,275                          | 48                                          | 40                                                                    |
|                                          | Nursing home / sheltered accommodation | 1,702,989                  | 107                                   | 1,282,483                        | 81                                          | 65                                                                    |
|                                          | Total cost (excl. lost productivity)   | 135,399,338                | 8,526                                 | 103,805,130                      | 6,536                                       | 30,084                                                                |
| Epilepsy                                 | Primary sector                         | 41,173,985                 | 580                                   | 19,904,667                       | 280                                         | 350                                                                   |
|                                          | Secondary sector - Outpatient          | 108,270,760                | 1,524                                 | 51,399,429                       | 723                                         | 3,615                                                                 |
|                                          | Secondary sector - Inpatient           | 236,872,420                | 3,334                                 | 162,384,494                      | 2,286                                       | 13,573                                                                |
|                                          | Filled prescriptions                   | 56,830,263                 | 800                                   | 39,757,000                       | 560                                         | 539                                                                   |
|                                          | Home care                              | 71,643,564                 | 1,008                                 | 57,009,489                       | 802                                         | 1,439                                                                 |
|                                          | Nursing home / sheltered accommodation | 186,490,441                | 2,625                                 | 148,199,767                      | 2,086                                       | 3,600                                                                 |
|                                          | Total cost (excl. lost productivity)   | 701,281,434                | 9,871                                 | 478,654,845                      | 6,737                                       | 23,117                                                                |
| Headache                                 | Primary sector                         | 45,555,311                 | 475                                   | 15,231,927                       | 159                                         | 213                                                                   |
|                                          | Secondary sector - Outpatient          | 133,513,223                | 1,393                                 | 53,710,708                       | 560                                         | 1,579                                                                 |
|                                          | Secondary sector - Inpatient           | 165,735,926                | 1,729                                 | 72,915,060                       | 761                                         | 2,660                                                                 |
|                                          | Filled prescriptions                   | 41,304,678                 | 431                                   | 18,445,725                       | 192                                         | 144                                                                   |
|                                          | Home care                              | 18,540,020                 | 193                                   | 5,347,719                        | 56                                          | 24                                                                    |
|                                          | Nursing home / sheltered accommodation | 38,547,780                 | 402                                   | 7,238,248                        | 76                                          | -2                                                                    |
|                                          | Total cost (excl. lost productivity)   | 443,196,937                | 4,625                                 | 172,889,385                      | 1,804                                       | 4,618                                                                 |
| Infections of the central nervous system | Primary sector                         | 11,203,340                 | 421                                   | 3,297,607                        | 124                                         | 168                                                                   |
|                                          | Secondary sector - Outpatient          | 33,558,808                 | 1,262                                 | 12,417,210                       | 467                                         | 2,276                                                                 |
|                                          | Secondary sector - Inpatient           | 53,806,027                 | 2,023                                 | 25,888,210                       | 974                                         | 19,530                                                                |
|                                          | Filled prescriptions                   | 9,714,465                  | 365                                   | 3,292,758                        | 124                                         | 181                                                                   |

|                                   |                                        | Prevalent cohort - 2015    |                                       |                                  |                                             | Incident cohort - 2011-2015                                           |
|-----------------------------------|----------------------------------------|----------------------------|---------------------------------------|----------------------------------|---------------------------------------------|-----------------------------------------------------------------------|
| Brain disorder                    | Cost component                         | Actual costs in 2015 (EUR) | Actual costs per person in 2015 (EUR) | Attributable costs in 2015 (EUR) | Attributable costs per person in 2015 (EUR) | Attributable costs per person in the first year after diagnosis (EUR) |
|                                   | Home care                              | 12,811,201                 | 482                                   | 7,584,973                        | 285                                         | 563                                                                   |
|                                   | Nursing home / sheltered accommodation | 27,418,463                 | 1,031                                 | 14,310,372                       | 538                                         | 461                                                                   |
|                                   | Total cost (excl. lost productivity)   | 148,512,305                | 5,585                                 | 66,791,130                       | 2,512                                       | 23,180                                                                |
| Intellectual disability           | Primary sector                         | 15,988,512                 | 583                                   | 9,893,121                        | 361                                         | 278                                                                   |
|                                   | Secondary sector - Outpatient          | 33,228,973                 | 1,213                                 | 17,182,705                       | 627                                         | 3,055                                                                 |
|                                   | Secondary sector - Inpatient           | 102,644,232                | 3,746                                 | 84,346,003                       | 3,078                                       | 9,397                                                                 |
|                                   | Filled prescriptions                   | 21,583,017                 | 788                                   | 17,432,722                       | 636                                         | 538                                                                   |
|                                   | Home care                              | 13,976,239                 | 510                                   | 12,449,542                       | 454                                         | 393                                                                   |
|                                   | Nursing home / sheltered accommodation | 32,339,423                 | 1,180                                 | 29,128,690                       | 1,063                                       | 598                                                                   |
|                                   | Total cost (excl. lost productivity)   | 219,760,396                | 8,020                                 | 170,432,783                      | 6,220                                       | 14,258                                                                |
| Multiple sclerosis                | Primary sector                         | 21,206,010                 | 1,503                                 | 16,200,681                       | 1,148                                       | 583                                                                   |
|                                   | Secondary sector - Outpatient          | 40,714,728                 | 2,885                                 | 27,233,358                       | 1,930                                       | 10,465                                                                |
|                                   | Secondary sector - Inpatient           | 43,448,943                 | 3,079                                 | 27,817,864                       | 1,971                                       | 4,925                                                                 |
|                                   | Filled prescriptions                   | 9,720,026                  | 689                                   | 5,629,372                        | 399                                         | 189                                                                   |
|                                   | Home care                              | 51,880,624                 | 3,676                                 | 49,746,582                       | 3,525                                       | 644                                                                   |
|                                   | Nursing home / sheltered accommodation | 31,328,567                 | 2,220                                 | 27,272,490                       | 1,933                                       | 335                                                                   |
|                                   | Total cost (excl. lost productivity)   | 198,298,897                | 14,051                                | 153,900,347                      | 10,905                                      | 17,140                                                                |
| Neuromuscular disorders           | Primary sector                         | 6,282,164                  | 901                                   | 3,972,937                        | 570                                         | 353                                                                   |
|                                   | Secondary sector - Outpatient          | 14,433,119                 | 2,071                                 | 8,172,495                        | 1,172                                       | 3,211                                                                 |
|                                   | Secondary sector - Inpatient           | 29,246,940                 | 4,196                                 | 20,898,189                       | 2,998                                       | 16,132                                                                |
|                                   | Filled prescriptions                   | 4,437,530                  | 637                                   | 2,451,542                        | 352                                         | 389                                                                   |
|                                   | Home care                              | 8,986,447                  | 1,289                                 | 7,194,501                        | 1,032                                       | 544                                                                   |
|                                   | Nursing home / sheltered accommodation | 8,955,012                  | 1,285                                 | 4,625,467                        | 664                                         | 147                                                                   |
|                                   | Total cost (excl. lost productivity)   | 72,341,211                 | 10,378                                | 47,315,130                       | 6,788                                       | 20,777                                                                |
| Other neurodegenerative disorders | Primary sector                         | 3,467,634                  | 1,660                                 | 2,695,799                        | 1,290                                       | 1,214                                                                 |
|                                   | Secondary sector - Outpatient          | 3,744,735                  | 1,792                                 | 1,557,828                        | 746                                         | 2,623                                                                 |
|                                   | Secondary sector - Inpatient           | 12,458,820                 | 5,963                                 | 9,519,636                        | 4,556                                       | 18,250                                                                |
|                                   | Filled prescriptions                   | 2,025,361                  | 969                                   | 1,312,465                        | 628                                         | 1,152                                                                 |
|                                   | Home care                              | 9,972,538                  | 4,773                                 | 9,295,614                        | 4,449                                       | 5,491                                                                 |
|                                   | Nursing home / sheltered accommodation | 15,620,797                 | 7,476                                 | 13,965,869                       | 6,684                                       | 3,904                                                                 |
|                                   | Total cost (excl. lost productivity)   | 47,289,884                 | 22,634                                | 38,347,211                       | 18,354                                      | 32,634                                                                |
| Parkinson's disease               | Primary sector                         | 14,860,564                 | 1,776                                 | 10,688,805                       | 1,278                                       | 910                                                                   |



|                                  |                                        | Prevalent cohort - 2015    |                                       |                                  |                                             | Incident cohort - 2011-2015                                           |
|----------------------------------|----------------------------------------|----------------------------|---------------------------------------|----------------------------------|---------------------------------------------|-----------------------------------------------------------------------|
| Brain disorder                   | Cost component                         | Actual costs in 2015 (EUR) | Actual costs per person in 2015 (EUR) | Attributable costs in 2015 (EUR) | Attributable costs per person in 2015 (EUR) | Attributable costs per person in the first year after diagnosis (EUR) |
|                                  | Secondary sector - Outpatient          | 17,312,390                 | 2,069                                 | 5,323,437                        | 636                                         | 2,069                                                                 |
|                                  | Secondary sector - Inpatient           | 46,402,317                 | 5,546                                 | 27,109,682                       | 3,240                                       | 8,711                                                                 |
|                                  | Filled prescriptions                   | 27,652,172                 | 3,305                                 | 23,257,252                       | 2,780                                       | 1,178                                                                 |
|                                  | Home care                              | 45,766,641                 | 5,470                                 | 38,139,915                       | 4,559                                       | 3,594                                                                 |
|                                  | Nursing home / sheltered accommodation | 118,302,501                | 14,140                                | 96,210,216                       | 11,499                                      | 5,067                                                                 |
|                                  | Total cost (excl. lost productivity)   | 270,296,586                | 32,307                                | 200,729,307                      | 23,992                                      | 21,530                                                                |
| Personality disorders            | Primary sector                         | 33,726,394                 | 475                                   | 12,370,687                       | 174                                         | 180                                                                   |
|                                  | Secondary sector - Outpatient          | 161,704,804                | 2,280                                 | 108,438,891                      | 1,529                                       | 5,307                                                                 |
|                                  | Secondary sector - Inpatient           | 294,012,210                | 4,145                                 | 237,084,594                      | 3,342                                       | 10,946                                                                |
|                                  | Filled prescriptions                   | 47,982,591                 | 676                                   | 33,993,717                       | 479                                         | 391                                                                   |
|                                  | Home care                              | 18,267,898                 | 258                                   | 13,204,541                       | 186                                         | 60                                                                    |
|                                  | Nursing home / sheltered accommodation | 50,162,995                 | 707                                   | 39,971,083                       | 563                                         | 175                                                                   |
|                                  | Total cost (excl. lost productivity)   | 605,856,892                | 8,541                                 | 445,063,513                      | 6,274                                       | 17,058                                                                |
| Polyneuropathy                   | Primary sector                         | 22,995,926                 | 721                                   | 9,555,562                        | 300                                         | 324                                                                   |
|                                  | Secondary sector - Outpatient          | 84,279,793                 | 2,643                                 | 47,316,582                       | 1,484                                       | 3,465                                                                 |
|                                  | Secondary sector - Inpatient           | 144,827,869                | 4,542                                 | 88,462,288                       | 2,775                                       | 8,416                                                                 |
|                                  | Filled prescriptions                   | 30,234,724                 | 948                                   | 16,995,029                       | 533                                         | 569                                                                   |
|                                  | Home care                              | 53,022,119                 | 1,663                                 | 35,217,614                       | 1,105                                       | 773                                                                   |
|                                  | Nursing home / sheltered accommodation | 92,592,235                 | 2,904                                 | 40,739,401                       | 1,278                                       | -89                                                                   |
|                                  | Total cost (excl. lost productivity)   | 427,952,666                | 13,423                                | 238,286,476                      | 7,474                                       | 13,458                                                                |
| Schizophrenia spectrum disorders | Primary sector                         | 25,870,906                 | 427                                   | 7,901,500                        | 130                                         | 130                                                                   |
|                                  | Secondary sector - Outpatient          | 184,183,351                | 3,039                                 | 138,302,570                      | 2,282                                       | 7,692                                                                 |
|                                  | Secondary sector - Inpatient           | 471,018,165                | 7,773                                 | 418,546,262                      | 6,907                                       | 28,598                                                                |
|                                  | Filled prescriptions                   | 60,736,022                 | 1,002                                 | 47,173,595                       | 778                                         | 584                                                                   |
|                                  | Home care                              | 40,669,756                 | 671                                   | 31,640,056                       | 522                                         | 328                                                                   |
|                                  | Nursing home / sheltered accommodation | 144,768,784                | 2,389                                 | 123,117,720                      | 2,032                                       | 1,259                                                                 |
|                                  | Total cost (excl. lost productivity)   | 927,246,985                | 15,302                                | 766,681,703                      | 12,652                                      | 38,591                                                                |
| Sleep disorders                  | Primary sector                         | 31,353,798                 | 512                                   | 11,799,623                       | 193                                         | 238                                                                   |
|                                  | Secondary sector - Outpatient          | 98,914,079                 | 1,616                                 | 41,921,108                       | 685                                         | 2,096                                                                 |
|                                  | Secondary sector - Inpatient           | 145,942,944                | 2,385                                 | 69,035,777                       | 1,128                                       | 3,396                                                                 |
|                                  | Filled prescriptions                   | 41,479,250                 | 678                                   | 23,820,309                       | 389                                         | 394                                                                   |
|                                  | Home care                              | 20,461,339                 | 334                                   | 9,184,546                        | 150                                         | 217                                                                   |

|                          |                                        | Prevalent cohort - 2015    |                                       |                                  |                                             | Incident cohort - 2011-2015                                           |
|--------------------------|----------------------------------------|----------------------------|---------------------------------------|----------------------------------|---------------------------------------------|-----------------------------------------------------------------------|
| Brain disorder           | Cost component                         | Actual costs in 2015 (EUR) | Actual costs per person in 2015 (EUR) | Attributable costs in 2015 (EUR) | Attributable costs per person in 2015 (EUR) | Attributable costs per person in the first year after diagnosis (EUR) |
|                          | Nursing home / sheltered accommodation | 31,784,606                 | 519                                   | 6,941,740                        | 113                                         | 45                                                                    |
|                          | Total cost (excl. lost productivity)   | 369,936,015                | 6,045                                 | 162,703,103                      | 2,659                                       | 6,386                                                                 |
| Stress-related disorders | Primary sector                         | 86,677,745                 | 444                                   | 29,534,278                       | 151                                         | 251                                                                   |
|                          | Secondary sector - Outpatient          | 334,672,975                | 1,716                                 | 190,005,389                      | 974                                         | 3,344                                                                 |
|                          | Secondary sector - Inpatient           | 594,516,328                | 3,048                                 | 435,161,116                      | 2,231                                       | 8,650                                                                 |
|                          | Filled prescriptions                   | 94,996,342                 | 487                                   | 55,121,881                       | 283                                         | 263                                                                   |
|                          | Home care                              | 52,036,361                 | 267                                   | 33,412,202                       | 171                                         | 132                                                                   |
|                          | Nursing home / sheltered accommodation | 136,104,200                | 698                                   | 94,380,524                       | 484                                         | 302                                                                   |
|                          | Total cost (excl. lost productivity)   | 1,299,003,951              | 6,660                                 | 837,615,391                      | 4,295                                       | 12,942                                                                |
| Stroke                   | Primary sector                         | 87,618,648                 | 759                                   | 36,193,449                       | 313                                         | 275                                                                   |
|                          | Secondary sector - Outpatient          | 200,887,719                | 1,740                                 | 56,107,195                       | 486                                         | 1,741                                                                 |
|                          | Secondary sector - Inpatient           | 462,612,656                | 4,006                                 | 236,363,400                      | 2,047                                       | 24,956                                                                |
|                          | Filled prescriptions                   | 92,706,631                 | 803                                   | 39,925,529                       | 346                                         | 356                                                                   |
|                          | Home care                              | 262,819,364                | 2,276                                 | 179,189,377                      | 1,552                                       | 1,443                                                                 |
|                          | Nursing home / sheltered accommodation | 710,435,792                | 6,152                                 | 461,833,282                      | 4,000                                       | 1,882                                                                 |
|                          | Total cost (excl. lost productivity)   | 1,817,080,811              | 15,736                                | 1,009,612,232                    | 8,743                                       | 30,654                                                                |
| Traumatic brain injury   | Primary sector                         | 83,545,461                 | 338                                   | 18,644,498                       | 75                                          | 140                                                                   |
|                          | Secondary sector - Outpatient          | 239,309,856                | 968                                   | 69,116,574                       | 280                                         | 707                                                                   |
|                          | Secondary sector - Inpatient           | 428,225,272                | 1,732                                 | 212,472,590                      | 859                                         | 7,836                                                                 |
|                          | Filled prescriptions                   | 75,591,648                 | 306                                   | 26,356,451                       | 107                                         | 117                                                                   |
|                          | Home care                              | 92,933,811                 | 376                                   | 50,946,346                       | 206                                         | 438                                                                   |
|                          | Nursing home / sheltered accommodation | 277,317,019                | 1,122                                 | 163,141,079                      | 660                                         | 950                                                                   |
|                          | Total cost (excl. lost productivity)   | 1,196,923,068              | 4,841                                 | 540,677,538                      | 2,187                                       | 10,188                                                                |

Abbreviations: EUR, Euro.

**Suppl. Table 5. Lost productivity in persons with prevalent brain disorders in Denmark in 2015, and incident brain disorders in Denmark during 2011-2015.**

| Brain disorder                           | Lost productivity associated with illness  |                                                       |                                                                           | Lost productivity due to premature death                           |                                                                               |                                                                                                       |
|------------------------------------------|--------------------------------------------|-------------------------------------------------------|---------------------------------------------------------------------------|--------------------------------------------------------------------|-------------------------------------------------------------------------------|-------------------------------------------------------------------------------------------------------|
|                                          | Attributable lost production in 2015 (EUR) | Attributable lost production per person in 2015 (EUR) | Attributable lost production per person in the year after diagnosis (EUR) | Attributable lost production among patients who died in 2015 (EUR) | Attributable lost production per person among patients who died in 2015 (EUR) | Attributable lost production per person among patients who died within one year after diagnosis (EUR) |
| Any brain disorder                       | 10,871,306,597                             | 15,471                                                | 11,501                                                                    | 310,599,261                                                        | 66,595                                                                        | 176,821                                                                                               |
| Alcohol abuse                            | 2,177,095,714                              | 30,509                                                | 26,454                                                                    | 60,885,257                                                         | 30,519                                                                        | 83,486                                                                                                |
| Anxiety disorders                        | 1,540,715,518                              | 19,281                                                | 19,717                                                                    | 32,197,400                                                         | 59,515                                                                        | 145,515                                                                                               |
| Bipolar disorder                         | 474,459,456                                | 27,521                                                | 25,383                                                                    | 6,136,984                                                          | 37,883                                                                        | 136,861                                                                                               |
| Brain tumours                            | 62,414,375                                 | 8,259                                                 | 15,068                                                                    | 44,062,492                                                         | 174,851                                                                       | 205,107                                                                                               |
| Cerebral palsy                           | 126,484,627                                | 24,291                                                | 31,767                                                                    | 487,951                                                            | 7,999                                                                         | 55,995                                                                                                |
| Dementia                                 | 118,974,339                                | 32,436                                                | 28,305                                                                    | 1,408,193                                                          | 8,140                                                                         | 28,505                                                                                                |
| Depression                               | 2,900,683,027                              | 21,708                                                | 20,838                                                                    | 64,470,952                                                         | 63,706                                                                        | 162,215                                                                                               |
| Developmental and behavioural disorders  | 845,403,290                                | 14,455                                                | 22,423                                                                    | 6,886,963                                                          | 47,171                                                                        | 96,899                                                                                                |
| Drug abuse                               | 1,330,382,612                              | 29,742                                                | 24,512                                                                    | 14,271,378                                                         | 22,908                                                                        | 67,596                                                                                                |
| Eating disorders                         | 83,103,235                                 | 5,798                                                 | 6,941                                                                     | 1,407,442                                                          | 54,132                                                                        | 25,604                                                                                                |
| Epilepsy                                 | 757,818,260                                | 16,449                                                | 18,764                                                                    | 39,647,665                                                         | 61,469                                                                        | 167,731                                                                                               |
| Headache                                 | 490,757,570                                | 6,493                                                 | 6,165                                                                     | 21,177,971                                                         | 101,330                                                                       | 174,465                                                                                               |
| Infections of the central nervous system | 30,214,014                                 | 1,814                                                 | 2,093                                                                     | 9,137,033                                                          | 103,830                                                                       | 152,402                                                                                               |
| Intellectual disability                  | 528,043,228                                | 29,465                                                | 30,237                                                                    | 278,285                                                            | 1,457                                                                         | 9,078                                                                                                 |
| Multiple sclerosis                       | 189,128,371                                | 16,804                                                | 9,354                                                                     | 1,721,160                                                          | 15,367                                                                        | 142,356                                                                                               |
| Neuromuscular disorders                  | 61,263,234                                 | 14,022                                                | 9,262                                                                     | 1,733,127                                                          | 36,875                                                                        | 106,274                                                                                               |
| Other neurodegenerative disorders        | 31,346,429                                 | 27,716                                                | 21,953                                                                    | 3,829,300                                                          | 55,497                                                                        | 134,409                                                                                               |
| Parkinson's disease                      | 32,248,038                                 | 22,662                                                | 14,259                                                                    | 3,565                                                              | 105                                                                           | 49,396                                                                                                |
| Personality disorders                    | 1,675,321,683                              | 25,663                                                | 22,217                                                                    | 13,071,803                                                         | 34,858                                                                        | 105,239                                                                                               |
| Polyneuropathy                           | 238,332,654                                | 16,662                                                | 16,701                                                                    | 8,543,728                                                          | 29,873                                                                        | 78,341                                                                                                |
| Schizophrenia spectrum disorders         | 1,707,738,198                              | 33,710                                                | 26,581                                                                    | 9,960,281                                                          | 17,173                                                                        | 90,396                                                                                                |
| Sleep disorders                          | 336,760,666                                | 8,691                                                 | 8,554                                                                     | 18,811,390                                                         | 79,373                                                                        | 133,551                                                                                               |
| Stress-related disorders                 | 3,167,569,516                              | 19,310                                                | 19,520                                                                    | 63,414,446                                                         | 69,917                                                                        | 175,773                                                                                               |
| Stroke                                   | 630,213,779                                | 16,502                                                | 14,382                                                                    | 25,874,307                                                         | 39,085                                                                        | 140,923                                                                                               |
| Traumatic brain injury                   | 1,241,809,744                              | 7,179                                                 | 7,245                                                                     | 41,136,013                                                         | 48,739                                                                        | 121,008                                                                                               |

Abbreviations: EUR, Euro.

Supplementary figures

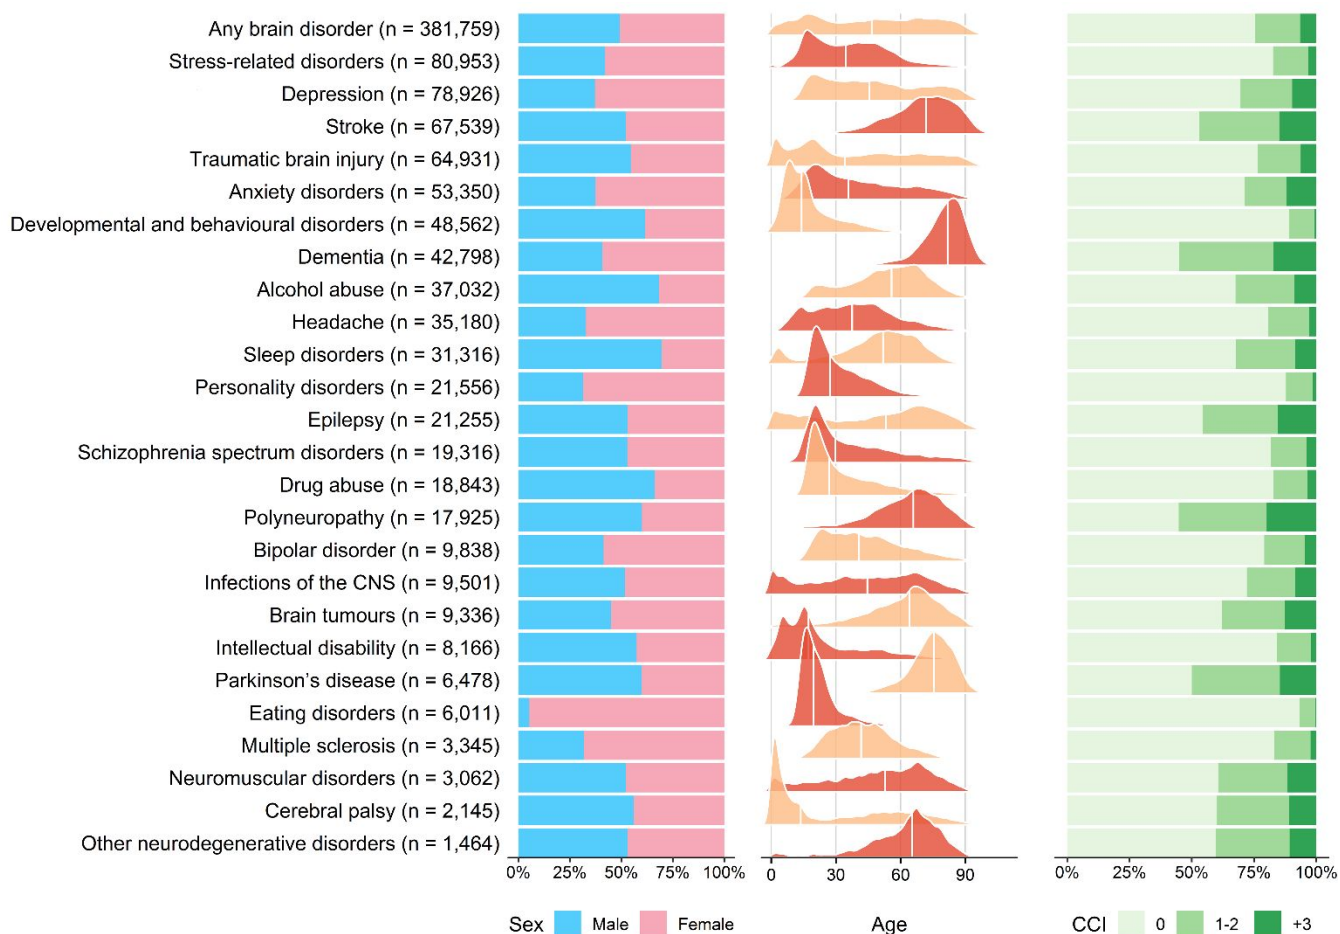

Suppl. Figure 1. Characteristics of patients with incident brain disorders in Denmark during 2011-2015 sorted from highest to lowest incidence (the white line in the age distribution represents the median age in each cohort).

Abbreviations: CNS, central nervous system; CCI, Charlson Comorbidity Index



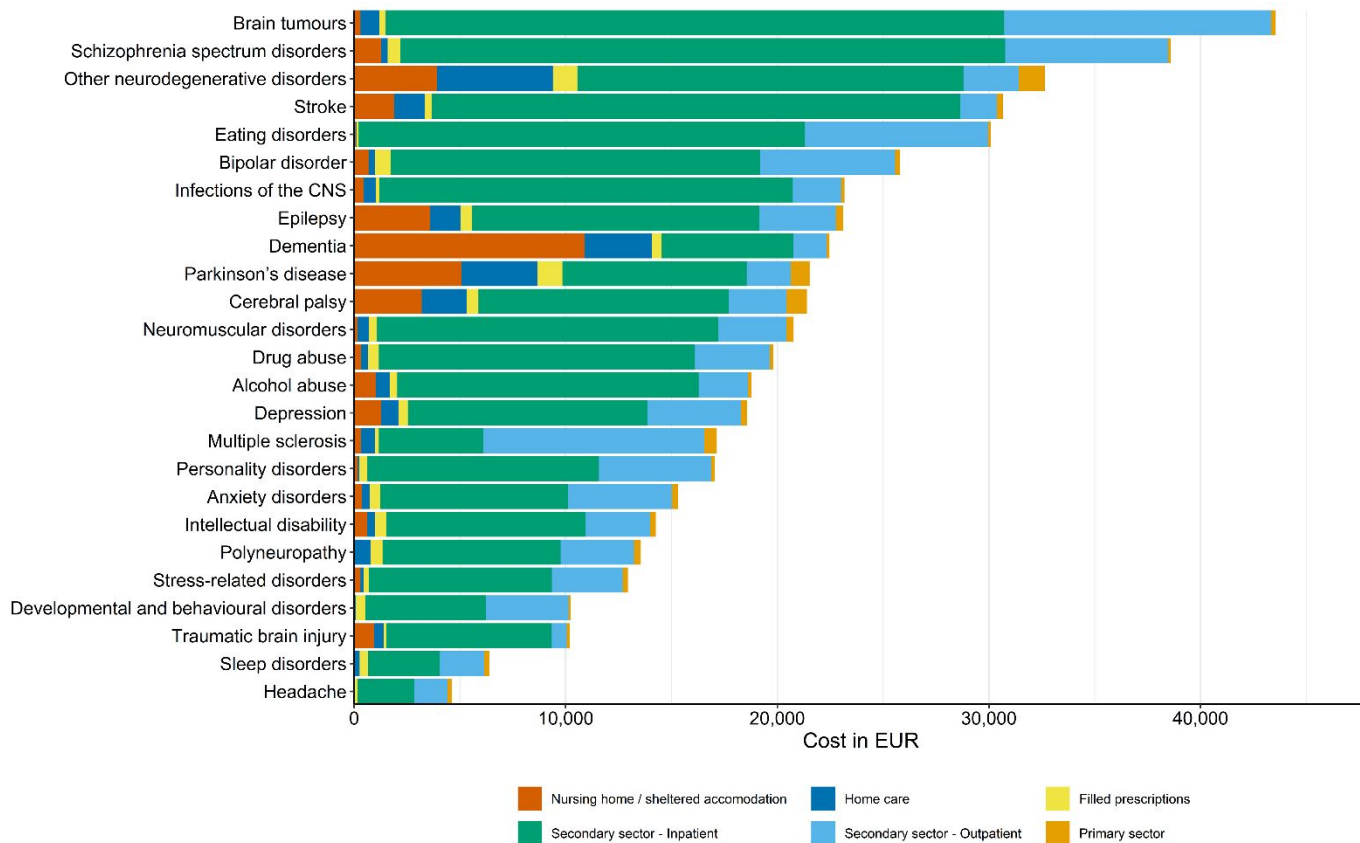

**Suppl. Figure 3. Attributable direct costs per person during the first year after diagnosis in persons with incident brain disorders in Denmark during 2011-2015 (in 2015 prices) sorted from highest to lowest costs.**

**Abbreviations: CNS, central nervous system**

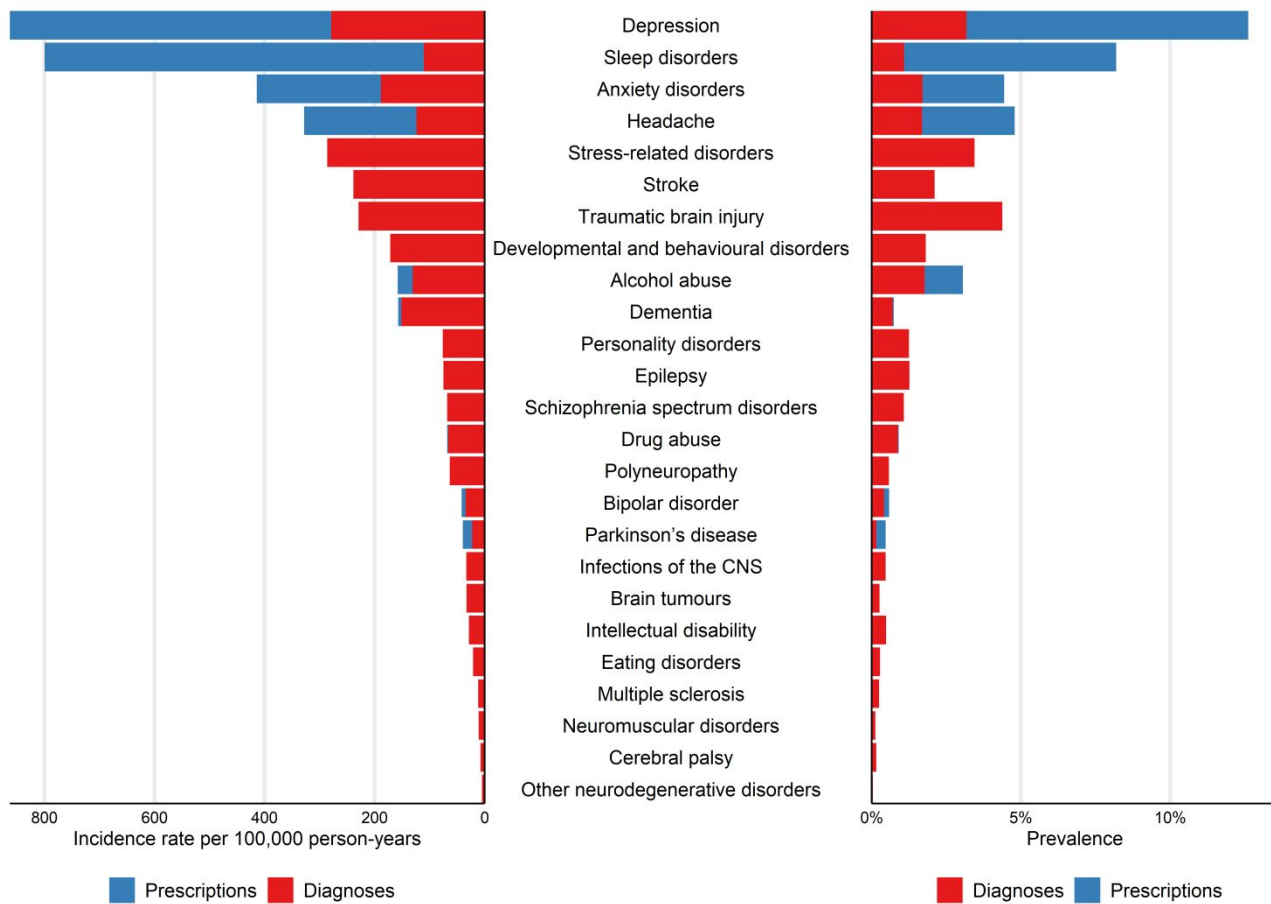

**Suppl. Figure 4. Occurrence of brain disorders in the Danish population including incidence during 2011-2015 and prevalence in 2015. Alcohol abuse, bipolar disorder, dementia, depression, drug abuse, headache, multiple sclerosis, Parkinson's disease, and sleep disorders were identified by either recorded hospital diagnoses or filled prescriptions of relevant medication, and all other brain disorders were identified by recorded hospital diagnoses.**

Abbreviations: CNS, central nervous system

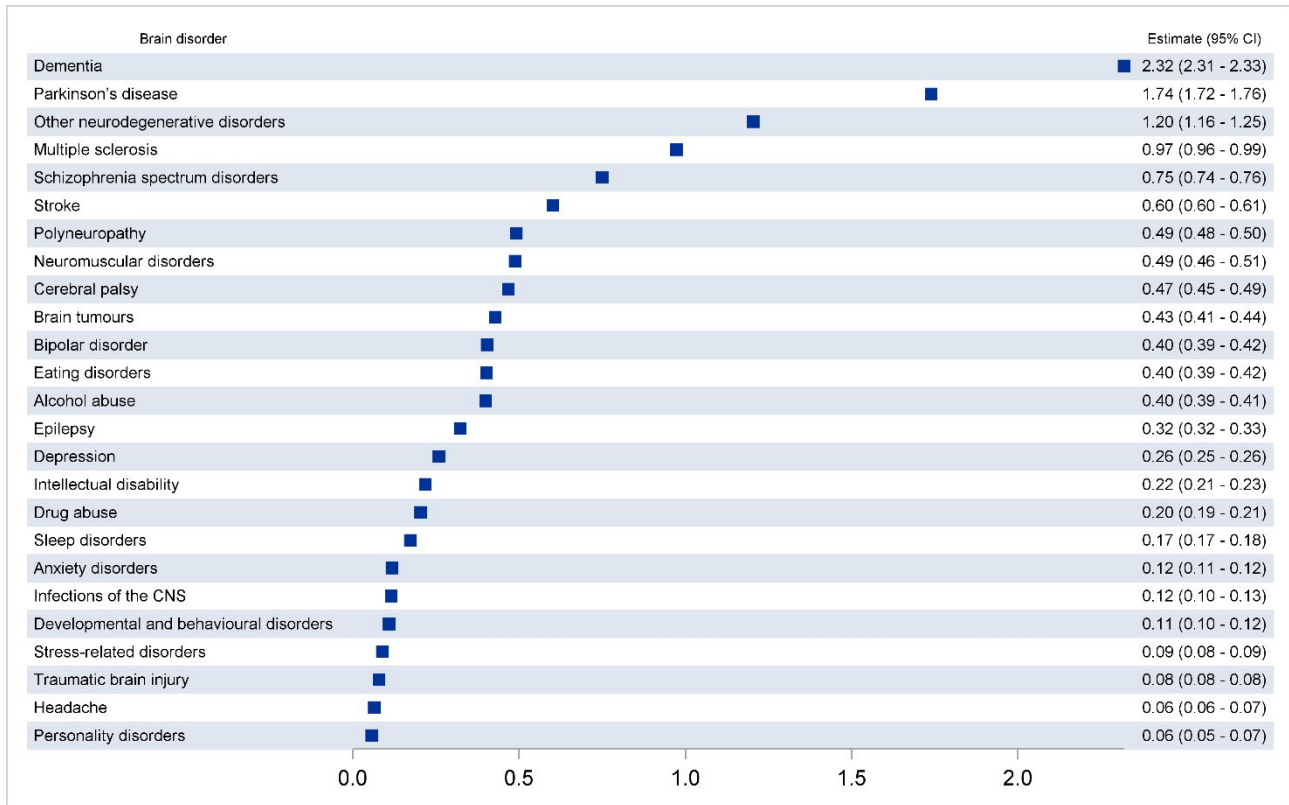

**Suppl. Figure 5. Costs in €10,000 associated with each of 25 groups of brain disorders adjusted for comorbid brain disorders in persons with prevalent brain disorders in Denmark in 2015 (2015 prices).**  
 Abbreviations: CI, confidence interval; CNS, central nervous system



## Supplementary references

1. Schmidt M, Schmidt SAJ, Adelborg K, et al. The Danish health care system and epidemiological research: from health care contacts to database records. *Clin Epidemiol* 2019;11:563-91. doi: 10.2147/clep.S179083
2. Schmidt M, Schmidt SA, Sandegaard JL, et al. The Danish National Patient Registry: a review of content, data quality, and research potential. *Clinical epidemiology* 2015;7:449-90. doi: 10.2147/CLEP.S91125 [doi]
3. Mors O, Perto GP, Mortensen PB. The Danish Psychiatric Central Research Register. *Scand J Public Health* 2011;39(7 Suppl):54-7. doi: 10.1177/1403494810395825
4. Ankjaer-Jensen A, Rosling P, Bilde L. Variable prospective financing in the Danish hospital sector and the development of a Danish case-mix system. *Health care management science* 2006;9(3):259-68.
5. Bilde L, Ankjaer-Jensen A, Danneskiold-Samsoe B. The "Health Benefit Basket" in Denmark: a description of entitlements, actors, and decision-making processes in the curative health sector. *Eur J Health Econ* 2005;Suppl:11-7. doi: 10.1007/s10198-005-0313-2
6. Pottegard A, Schmidt SAJ, Wallach-Kildemoes H, et al. Data Resource Profile: The Danish National Prescription Registry. *Int J Epidemiol* 2017;46(3):798-98f. doi: 10.1093/ije/dyw213
7. Statistics Denmark. Documentation of statistics [cited 2019 12/12]. Available from: <https://www.dst.dk/en/Statistik/dokumentation/documentationofstatistics> accessed 12 Dec 2019.

STROBE Statement—Checklist of items that should be included in reports of *cohort studies*

|                              | Item No | Recommendation                                                                                                                                                                                                                                                                                                                                                                                                |                                               |
|------------------------------|---------|---------------------------------------------------------------------------------------------------------------------------------------------------------------------------------------------------------------------------------------------------------------------------------------------------------------------------------------------------------------------------------------------------------------|-----------------------------------------------|
| <b>Title and abstract</b>    | 1       | (a) Indicate the study's design with a commonly used term in the title or the abstract<br>(b) Provide in the abstract an informative and balanced summary of what was done and what was found                                                                                                                                                                                                                 | title page<br>page 3                          |
| <b>Introduction</b>          |         |                                                                                                                                                                                                                                                                                                                                                                                                               |                                               |
| Background/rationale         | 2       | Explain the scientific background and rationale for the investigation being reported                                                                                                                                                                                                                                                                                                                          | page 6                                        |
| Objectives                   | 3       | State specific objectives, including any prespecified hypotheses                                                                                                                                                                                                                                                                                                                                              | page 6                                        |
| <b>Methods</b>               |         |                                                                                                                                                                                                                                                                                                                                                                                                               |                                               |
| Study design                 | 4       | Present key elements of study design early in the paper                                                                                                                                                                                                                                                                                                                                                       | page 7                                        |
| Setting                      | 5       | Describe the setting, locations, and relevant dates, including periods of recruitment, exposure, follow-up, and data collection                                                                                                                                                                                                                                                                               | page 7                                        |
| Participants                 | 6       | (a) Give the eligibility criteria, and the sources and methods of selection of participants. Describe methods of follow-up<br>(b) For matched studies, give matching criteria and number of exposed and unexposed                                                                                                                                                                                             | page 7<br>page 7                              |
| Variables                    | 7       | Clearly define all outcomes, exposures, predictors, potential confounders, and effect modifiers. Give diagnostic criteria, if applicable                                                                                                                                                                                                                                                                      | page 8-9                                      |
| Data sources/<br>measurement | 8*      | For each variable of interest, give sources of data and details of methods of assessment (measurement). Describe comparability of assessment methods if there is more than one group                                                                                                                                                                                                                          | page 8-9 +<br>Appendix 1                      |
| Bias                         | 9       | Describe any efforts to address potential sources of bias                                                                                                                                                                                                                                                                                                                                                     | page 10-11                                    |
| Study size                   | 10      | Explain how the study size was arrived at                                                                                                                                                                                                                                                                                                                                                                     | page 7                                        |
| Quantitative variables       | 11      | Explain how quantitative variables were handled in the analyses. If applicable, describe which groupings were chosen and why                                                                                                                                                                                                                                                                                  | page 8-9                                      |
| Statistical methods          | 12      | (a) Describe all statistical methods, including those used to control for confounding<br>(b) Describe any methods used to examine subgroups and interactions<br>(c) Explain how missing data were addressed<br>(d) If applicable, explain how loss to follow-up was addressed<br>(e) Describe any sensitivity analyses                                                                                        | page 9-10<br>page 9-10<br>NA<br>NA<br>page 10 |
| <b>Results</b>               |         |                                                                                                                                                                                                                                                                                                                                                                                                               |                                               |
| Participants                 | 13*     | (a) Report numbers of individuals at each stage of study—eg numbers potentially eligible, examined for eligibility, confirmed eligible, included in the study, completing follow-up, and analysed<br>(b) Give reasons for non-participation at each stage<br>(c) Consider use of a flow diagram                                                                                                               | page 11<br>NA<br>NA                           |
| Descriptive data             | 14*     | (a) Give characteristics of study participants (eg demographic, clinical, social) and information on exposures and potential confounders<br>(b) Indicate number of participants with missing data for each variable of interest<br>(c) Summarise follow-up time (eg, average and total amount)                                                                                                                | page 11+22<br>NA<br>-                         |
| Outcome data                 | 15*     | Report numbers of outcome events or summary measures over time                                                                                                                                                                                                                                                                                                                                                | page 11-12                                    |
| Main results                 | 16      | (a) Give unadjusted estimates and, if applicable, confounder-adjusted estimates and their precision (eg, 95% confidence interval). Make clear which confounders were adjusted for and why they were included<br>(b) Report category boundaries when continuous variables were categorized<br>(c) If relevant, consider translating estimates of relative risk into absolute risk for a meaningful time period | page 12<br>NA<br>NA                           |

|    |                          |    |                                                                                                                                                                            |            |
|----|--------------------------|----|----------------------------------------------------------------------------------------------------------------------------------------------------------------------------|------------|
| 1  | Other analyses           | 17 | Report other analyses done—eg analyses of subgroups and interactions, and sensitivity analyses                                                                             | page 13    |
| 2  |                          |    |                                                                                                                                                                            |            |
| 3  |                          |    |                                                                                                                                                                            |            |
| 4  | <b>Discussion</b>        |    |                                                                                                                                                                            |            |
| 5  | Key results              | 18 | Summarise key results with reference to study objectives                                                                                                                   | page 13-14 |
| 6  | Limitations              | 19 | Discuss limitations of the study, taking into account sources of potential bias or imprecision. Discuss both direction and magnitude of any potential bias                 | page 14-15 |
| 7  |                          |    |                                                                                                                                                                            |            |
| 8  | Interpretation           | 20 | Give a cautious overall interpretation of results considering objectives, limitations, multiplicity of analyses, results from similar studies, and other relevant evidence | page 15-16 |
| 9  |                          |    |                                                                                                                                                                            |            |
| 10 | Generalisability         | 21 | Discuss the generalisability (external validity) of the study results                                                                                                      | page 15-16 |
| 11 |                          |    |                                                                                                                                                                            |            |
| 12 | <b>Other information</b> |    |                                                                                                                                                                            |            |
| 13 | Funding                  | 22 | Give the source of funding and the role of the funders for the present study and, if applicable, for the original study on which the present article is based              | page 17    |
| 14 |                          |    |                                                                                                                                                                            |            |
| 15 |                          |    |                                                                                                                                                                            |            |
| 16 |                          |    |                                                                                                                                                                            |            |

\*Give information separately for exposed and unexposed groups.

**Note:** An Explanation and Elaboration article discusses each checklist item and gives methodological background and published examples of transparent reporting. The STROBE checklist is best used in conjunction with this article (freely available on the Web sites of PLoS Medicine at <http://www.plosmedicine.org/>, Annals of Internal Medicine at <http://www.annals.org/>, and Epidemiology at <http://www.epidem.com/>). Information on the STROBE Initiative is available at <http://www.strobe-statement.org>.

# BMJ Open

## OCCURRENCE, MORTALITY, AND COST OF BRAIN DISORDERS IN DENMARK: A POPULATION-BASED COHORT STUDY

|                                 |                                                                                                                                                                                                                                                                                                                                                                                                                                                                                                                        |
|---------------------------------|------------------------------------------------------------------------------------------------------------------------------------------------------------------------------------------------------------------------------------------------------------------------------------------------------------------------------------------------------------------------------------------------------------------------------------------------------------------------------------------------------------------------|
| Journal:                        | <i>BMJ Open</i>                                                                                                                                                                                                                                                                                                                                                                                                                                                                                                        |
| Manuscript ID                   | bmjopen-2020-037564.R1                                                                                                                                                                                                                                                                                                                                                                                                                                                                                                 |
| Article Type:                   | Original research                                                                                                                                                                                                                                                                                                                                                                                                                                                                                                      |
| Date Submitted by the Author:   | 02-Aug-2020                                                                                                                                                                                                                                                                                                                                                                                                                                                                                                            |
| Complete List of Authors:       | Vestergaard, Søren; Aarhus University Hospital, Department of Clinical Epidemiology<br>Rasmussen, Thomas; Aarhus University Hospital, Department of Clinical Epidemiology<br>Stallknecht, Sandra; NA, INCENTIVE<br>Olsen, Jens; NA, INCENTIVE<br>Skipper, Niels; Aarhus University, Department of Economics and Business Economics<br>Sørensen, Henrik T.; Aarhus University Hospital, Department of Clinical Epidemiology<br>Christiansen, Christian; Aarhus University Hospital, Department of Clinical Epidemiology |
| <b>Primary Subject Heading</b>: | Epidemiology                                                                                                                                                                                                                                                                                                                                                                                                                                                                                                           |
| Secondary Subject Heading:      | Epidemiology, Neurology, Public health, Mental health, Health economics                                                                                                                                                                                                                                                                                                                                                                                                                                                |
| Keywords:                       | EPIDEMIOLOGY, Health economics < HEALTH SERVICES ADMINISTRATION & MANAGEMENT, NEUROLOGY, PSYCHIATRY                                                                                                                                                                                                                                                                                                                                                                                                                    |
|                                 |                                                                                                                                                                                                                                                                                                                                                                                                                                                                                                                        |

SCHOLARONE™  
Manuscripts



I, the Submitting Author has the right to grant and does grant on behalf of all authors of the Work (as defined in the below author licence), an exclusive licence and/or a non-exclusive licence for contributions from authors who are: i) UK Crown employees; ii) where BMJ has agreed a CC-BY licence shall apply, and/or iii) in accordance with the terms applicable for US Federal Government officers or employees acting as part of their official duties; on a worldwide, perpetual, irrevocable, royalty-free basis to BMJ Publishing Group Ltd ("BMJ") its licensees and where the relevant Journal is co-owned by BMJ to the co-owners of the Journal, to publish the Work in this journal and any other BMJ products and to exploit all rights, as set out in our [licence](#).

The Submitting Author accepts and understands that any supply made under these terms is made by BMJ to the Submitting Author unless you are acting as an employee on behalf of your employer or a postgraduate student of an affiliated institution which is paying any applicable article publishing charge ("APC") for Open Access articles. Where the Submitting Author wishes to make the Work available on an Open Access basis (and intends to pay the relevant APC), the terms of reuse of such Open Access shall be governed by a Creative Commons licence – details of these licences and which [Creative Commons](#) licence will apply to this Work are set out in our licence referred to above.

Other than as permitted in any relevant BMJ Author's Self Archiving Policies, I confirm this Work has not been accepted for publication elsewhere, is not being considered for publication elsewhere and does not duplicate material already published. I confirm all authors consent to publication of this Work and authorise the granting of this licence.

# OCCURRENCE, MORTALITY, AND COST OF BRAIN DISORDERS IN DENMARK: A POPULATION-BASED COHORT STUDY

Søren Viborg Vestergaard<sup>1</sup>, Thomas Bøjer Rasmussen<sup>1</sup>, Sandra Stallknecht<sup>2</sup>, Jens Olsen<sup>2</sup>, Niels Skipper<sup>3</sup>,  
Henrik Toft Sørensen<sup>1</sup>, Christian Fynbo Christiansen<sup>1</sup>

<sup>1</sup> Department of Clinical Epidemiology, Aarhus University Hospital, Aarhus, Denmark

<sup>2</sup> INCENTIVE, Holte, Denmark

<sup>3</sup> Department of Economics and Business Economics, Aarhus University, Aarhus, Denmark

**Email addresses:** [sovi@clin.au.dk](mailto:sovi@clin.au.dk), [tbr@clin.au.dk](mailto:tbr@clin.au.dk), [ses@incentive.dk](mailto:ses@incentive.dk), [jo@incentive.dk](mailto:jo@incentive.dk),  
[nskipper@econ.au.dk](mailto:nskipper@econ.au.dk), [hts@clin.au.dk](mailto:hts@clin.au.dk), [cfc@clin.au.dk](mailto:cfc@clin.au.dk)

**ORCID IDs:** SVV, [0000-0002-8445-7758](https://orcid.org/0000-0002-8445-7758); TBR, [0000-0003-0120-1712](https://orcid.org/0000-0003-0120-1712); SS, [0000-0002-1721-3665](https://orcid.org/0000-0002-1721-3665); NS, [0000-0001-5766-4420](https://orcid.org/0000-0001-5766-4420); HTS, [0000-0003-4299-7040](https://orcid.org/0000-0003-4299-7040); CFC, [0000-0002-0727-953X](https://orcid.org/0000-0002-0727-953X)

**Corresponding author address:** Søren Viborg Vestergaard (@epi\_viborg), Department of Clinical Epidemiology, Aarhus University Hospital, Olof Palmes Alle 43-45, 8200 Aarhus N, Denmark

**Word count, main text:** 3305 words

**Word count, abstract:** 293 words

**Keywords:** Brain disorders, mental disorders, neurologic disorders, epidemiology, cost-of-illness

## ABSTRACT

### Objectives

To examine the occurrence of brain disorders (*i.e.*, neurological and mental disorders) in Denmark and mortality and cost-of-illness among affected persons.

### Design

Matched cohort study.

### Setting

We obtained routinely collected registry data on all Danish residents during 1995-2015.

### Participants

We identified all persons alive on 1 January 2015 with a diagnosis of 25 specific brain disorders (prevalent cohort) and all persons with an incident diagnosis during 2011-2015 (incident cohort). Each person was matched on age and sex with 10 persons from the general population without the brain disorder of interest.

### Primary and secondary outcome measures

Prevalence and incidence of hospital-diagnosed brain disorders, 1-year absolute and relative mortality, and attributable direct and indirect costs-of-illness compared with the corresponding matched cohorts.

### Results

We identified 1,075,081 persons with at least one prevalent brain disorder (*any brain disorder*) on 1 January 2015, corresponding to 18.9% of the Danish population. The incidence rate of *any brain disorder* during 2011-2015 was 1,349 per 100,000 person-years (95% confidence interval [CI]: 1,345-1,353). One-year mortality after diagnosis was increased in persons with *any brain disorder* (hazard ratio = 4.7 [95% CI: 4.7-4.8]) and in persons in every group of specific brain disorders compared to the matched cohort from the general population. The total attributable direct costs of brain disorders in 2015 were €5.2 billion and

1  
2  
3  
4 total attributable indirect costs were €11.2 billion. Traumatic brain injury, stress-related disorders,  
5  
6 depression, and stroke were the most common brain disorders. Attributable costs were highest for  
7  
8 depression, dementia, stress-related disorders, and stroke.  
9

## 10 **Conclusions**

11  
12  
13 One in five Danish residents alive on 1 January 2015 had been diagnosed with at least one brain disorder,  
14  
15 and mortality was five times higher in persons with any diagnosed brain disorder than in the general  
16  
17 population. We found high attributable direct and indirect costs of brain disorders.  
18  
19  
20  
21  
22  
23  
24  
25  
26  
27  
28  
29  
30  
31  
32  
33  
34  
35  
36  
37  
38  
39  
40  
41  
42  
43  
44  
45  
46  
47  
48  
49  
50  
51  
52  
53  
54  
55  
56  
57  
58  
59  
60



1  
2  
3  
4  
5  
6  
7  
8  
9  
10  
11  
12  
13  
14  
15  
16  
17  
18  
19  
20  
21  
22  
23  
24  
25  
26  
27  
28  
29  
30  
31  
32  
33  
34  
35  
36  
37  
38  
39  
40  
41  
42  
43  
44  
45  
46  
47  
48  
49  
50  
51  
52  
53  
54  
55  
56  
57  
58  
59  
60

## STRENGTHS AND LIMITATIONS OF THIS STUDY

- We examined epidemiology and societal costs of hospital-diagnosed brain disorders using individual-level data on a well-defined population with complete follow-up.
- Both epidemiology and cost were estimated among persons with one of 25 specific brain disorders, and among persons with any brain disorders taking into account comorbid disorders.
- We identified persons with incident brain disorders during 2011-2015, whereas persons alive on 1 January 2015 with brain disorders diagnosed from 1995 to 2014 were considered prevalent.
- We estimated 1-year mortality among persons with incident brain disorders, and direct and indirect societal costs among persons with prevalent brain disorders.
- Direct costs included cost of services in primary care, secondary care, and costs of medication, nursing home, sheltered accommodation, personal nursing, home nurse visits, and hospital-based neuro rehabilitation, whereas lost productivity was considered indirect costs.

## BACKGROUND

Brain disorders, including both neurological and mental disorders, are the leading cause of years lived with disability worldwide.<sup>1,2</sup> In 2010, it was estimated that 260 million persons in Europe (~50% of the population) lived with a brain disorder with an estimated total cost-of-illness of €798 billion.<sup>3,4</sup> Based on this appraisal, mental disorders alone were estimated to account for 4.1% of European countries' combined gross domestic product (GDP) in 2015.<sup>5</sup> The global burden of brain disorders is expected to double between 2010 and 2030.<sup>6,7</sup>

Previous estimates of overall occurrence and cost of brain disorders relied on heterogeneous data sources without individual-level data. This excluded consideration of comorbid brain disorders in estimates of the incidence, prevalence, mortality, and cost-of-illness of brain disorders.<sup>2,3,8</sup> Therefore, single persons with multiple disorders were counted more than once, causing potential overestimation of the occurrence. Previous studies also focused on cause-specific mortality rather than all-cause mortality. This could have led to underestimation of excess mortality associated with brain disorders due to incompletely recorded brain disorders on death certificates.<sup>2,9</sup> Thus, there is a need for valid updated estimates of occurrence, mortality, and cost of brain disorders to better understand the public health burden and healthcare planning needs.<sup>7</sup>

We conducted this population-based study using routinely collected individual-level registry data to examine the prevalence and incidence of brain disorders in the Danish population during 2011-2015, as well as mortality and cost-of-illness in these patients.

## METHODS

### Setting

We conducted a population-based cohort study encompassing the entire Danish population during 2011-2015. In Denmark, healthcare is primarily tax-funded with equal access for every Danish resident. We examined occurrence, mortality, and costs of brain disorders using nationwide data from healthcare and socioeconomic registries.<sup>10</sup>

### Study design and participants

The following 25 predefined groups of brain disorders were examined: *alcohol abuse, anxiety disorders, bipolar disorder, brain tumours, cerebral palsy, dementia, depression, developmental and behavioural disorders, drug abuse, eating disorders, epilepsy, headache, infections of the central nervous system, intellectual disability, multiple sclerosis, neuromuscular disorders, other neurodegenerative disorders, Parkinson's disease, personality disorders, polyneuropathy, schizophrenia spectrum disorders, sleep disorders, stress-related disorders, stroke, and traumatic brain injury*. Disorders were selected if expected to be common or critical, and we prioritized to select groups of disorders examined in previous studies to enable comparison of our results.<sup>2, 3</sup> For each of 25 specific brain disorders, we established two cohorts: a prevalent cohort of persons alive on 1 January 2015 who had a diagnosis of the specific brain disorder recorded during the 1995-2014 period and an incident cohort of persons with a first-time diagnosis recorded during the 1 January 2011 to 31 December 2015 period. We also identified every Danish resident with *any brain disorder, i.e.*, each person with any of the specific 25 disorders was identified on the date of his or her first diagnosis. To avoid double-counting, every person could only be included once in the *any brain disorder* cohort.

For each of the 25 specific brain disorder cohorts and the *any brain disorder* cohort, we created a matched comparison cohort for the incident cohort and a matched comparison cohort for the prevalent cohort. Each person in the brain disorder cohorts was matched to 10 living persons from the general population on birth

1  
2  
3  
4 year and sex (sampled with replacement).<sup>11</sup> Matched persons could not have the brain disorder of interest  
5  
6 as of the index date of the person with the brain disorder. The index dates of matching were the date of the  
7  
8 brain disorder diagnosis for the incident cohort and 1 January 2015 for the prevalent cohort.  
9

## 10 11 **Variables**

12  
13  
14 The unambiguous personal identifier assigned to every Danish resident enabled us to identify and link every  
15  
16 person across national registries to estimate occurrence, mortality, and cost-of-illness of brain disorders on  
17  
18 the individual level (see detailed description of the data sources in Appendix 1).<sup>10</sup>  
19

20  
21 We identified persons with brain disorders by means of inpatient and outpatient hospital diagnoses (both  
22  
23 primary and secondary diagnoses) coded in the Danish National Patient Registry according to the  
24  
25 *International Classification of Diseases, Tenth Revision* (ICD-10).<sup>12</sup> ICD codes are provided in Appendix 2.  
26  
27

28 To estimate mortality, we retrieved the dates of death of persons who died during the study period from  
29  
30 the Danish Civil Registration System.<sup>10</sup>  
31

32  
33 To estimate direct costs, we obtained individual-level information on all primary care services provided by  
34  
35 general practitioners and dentists from the Danish Health Service Registry,<sup>13</sup> individual-level medication  
36  
37 expenditures from the Danish National Prescription Registry,<sup>14</sup> and individual-level information on nursing  
38  
39 home or sheltered accommodation, personal nursing and other personal care, home nurse visits, and  
40  
41 hospital-based neuro rehabilitation from Statistics Denmark.<sup>15</sup> We also computed costs of secondary care  
42  
43 including hospital inpatient admissions, outpatient specialist clinic visits, and emergency room contacts  
44  
45 based on the Diagnosis Related Group (DRG) and Danish Ambulatory Grouping System (DAGS) tariffs.<sup>16</sup>  
46  
47

48 Medication costs were computed using market prices for prescriptions filled at outpatient pharmacies and  
49  
50 in-hospital medication costs were included in the DRG/DAGS tariffs. To estimate indirect costs, we first  
51  
52 estimated lost productivity associated with illness by subtracting the personal income of persons in the  
53  
54 matched comparison cohorts from the personal income of persons with brain disorders (all before taxes).  
55  
56

57 We then estimated lost productivity due to premature death (difference in actual age of death and  
58  
59  
60

1  
2  
3  
4 expected age at death based on the average life expectancy of persons of same age and sex in Denmark).

5  
6 We obtained 2015 cost information for persons in the prevalent cohort and their comparison cohort and  
7  
8 from index date for persons in the incident cohort and their comparison cohort.

9  
10  
11 Finally, we obtained information on prior comorbid brain disorders and on prior non-mental disorders  
12  
13 included in the Charlson Comorbidity Index (CCI) up to 10 years before the index date of every person in  
14  
15 the brain disorder and comparison cohorts.<sup>12</sup> Using the comorbid diseases included in the CCI, we  
16  
17 calculated a CCI score for every person (CCI score: 0 = low, 1-2 = medium, 3+ = high comorbidity).<sup>17, 18</sup>

## 20 **Statistical analyses**

### 23 *Occurrence*

24  
25 We used any diagnosis from 1 January 1995 to 31 December 2014 as the basis for computing the period  
26  
27 prevalence of each of the 25 brain disorders in persons alive on 1 January 2015. To estimate the average  
28  
29 annual incidence of the different brain disorders, we computed incidence rates (IRs) of newly diagnosed  
30  
31 persons per 100 000 person-years at risk between 1 January 2011 and 31 December 2015. We considered a  
32  
33 person to be at risk of an incident specific brain disorder only if he or she did not have a diagnosis of that  
34  
35 specific brain disorder during 1995-2010. We characterised persons with brain disorders by age, sex, CCI  
36  
37 conditions, and CCI score on the index date across the 25 groups of disorders.

### 42 *Mortality*

43  
44 We computed 1-year mortality for persons with brain disorders and for persons in their matched  
45  
46 comparison cohorts and compared these by means of crude and adjusted hazard ratios (HRs) obtained  
47  
48 from a Cox regression model adjusted for age, sex, and CCI score.

### 52 *Cost-of-illness*

53  
54 To estimate the economic burden of the 25 brain disorders, we used the human capital approach to  
55  
56 conduct a societal cost-of-illness analysis including both direct and indirect individual-level costs.<sup>19, 20</sup> For  
57  
58  
59  
60

1  
2  
3  
4 each brain disorder, we computed direct and indirect costs-of-illness for every individual in our study  
5  
6 population. We estimated both overall annual costs and average annual costs per person. Direct costs were  
7  
8 computed both as actual direct costs (*i.e.*, costs of healthcare services) and attributable direct costs (*i.e.*,  
9  
10 the cost of healthcare services for persons with brain disorders minus the cost of healthcare services for  
11  
12 persons of the same age and sex in the comparison cohorts). For persons with incident brain disorders, we  
13  
14 further computed the distribution of the attributable direct costs per person during the first year after the  
15  
16 diagnosis, as we expected substantial direct and indirect costs during this year.  
17  
18

19  
20 We computed attributable indirect costs (*i.e.*, loss of productivity) in patients of working age, *i.e.*, ages 18-  
21  
22 65 years. In persons living with brain disorder diagnoses, we computed loss of productivity associated with  
23  
24 illness as yearly income before taxes in persons with brain disorders subtracted from the yearly income in  
25  
26 living members of the comparison cohorts. For persons who died after diagnoses of brain disorders, we  
27  
28 estimated loss of productivity due to premature death as the annual income during the year before death  
29  
30 multiplied by the number of lost years of life, assuming that they otherwise would have survived to age 66  
31  
32 years (accounting for the risk of dying each year and discounting future costs with 4% per annum).<sup>19, 20</sup>  
33  
34

### 35 36 *Sensitivity analyses*

37  
38  
39 Patients with *alcohol abuse, bipolar disorder, dementia, depression, drug abuse, headache, multiple*  
40  
41 *sclerosis, Parkinson's disease, and sleep disorders* are commonly treated in general practice with  
42  
43 medication specific for those disorders. Thus, we performed sensitivity analyses that included both persons  
44  
45 with hospital diagnoses and persons who filled prescriptions for relevant pharmacological treatments of  
46  
47 these disorders (including information on indication for the prescription when relevant).<sup>14</sup> We repeated all  
48  
49 occurrence and cost analyses on these extended cohorts.  
50  
51

52  
53 In addition, we performed attributable cost analyses, in which we modelled the average annual costs per  
54  
55 person for each group of brain disorders using an ordinary least squares (OLS) regression, adjusting for  
56  
57 comorbid brain disorders in individuals with more than one brain disorder.  
58  
59  
60

Analyses were performed using SAS version 9.4 (Cary, NC, USA), and visualization was made using Tidyverse packages in R version 3.6.1.<sup>21</sup> The study was approved by the Danish Data Protection Agency through registration at Aarhus University (record number 2016-051-000001/603). According to Danish legislation, no approval from an ethics committee or informed consent from patients is required for registry-based studies.

### **Patient involvement statement**

This study was done without patient involvement. Patients were not invited to comment on the study design, to develop patient relevant outcomes, or interpret the results. Patients were not invited to contribute to the writing or editing of the manuscript.

## **RESULTS**

### **Patient characteristics**

The characteristics of 1 075 081 persons with prevalent brain disorders in 2015 are displayed in Figure 1, and those of 381 759 persons with incident brain disorders during 2011-2015 are displayed in Suppl. Figure 1. Approximately half of persons with *any brain disorder* were female, occurrence was stable across ages, and three out of four persons had no or mild comorbidity (both in the prevalent and incident cohorts) (Figure 1, Suppl. Figure 1, Suppl. Table 1, and Suppl. Table 2). The proportions of persons with specific brain disorders who were diagnosed with specific comorbid somatic or mental disorders before index date are displayed in Suppl. Figure 2.

### **Occurrence**

On 1 January 2015, 18.9% of the Danish population had been diagnosed with *any brain disorder*. Among persons without prior brain disorder diagnoses, the IR of *any brain disorder* was 1 349 per 100 000 person-years during 2011-2015 (Suppl. Table 3).

1  
2  
3  
4 The prevalence in 2015 and incidence in 2011-2015 of the 25 groups of brain disorders in the Danish  
5 population are displayed in Figure 2. *Traumatic brain disorders* were the most common brain disorders,  
6 with a prevalence of 4.4% (Figure 2 and Suppl. Table 3), followed by *stress-related disorders* (3.4%) and  
7 *depression* (3.2%) (Figure 2).  
8  
9  
10  
11  
12

13 During 2011-2015, IRs were highest for *stress-related disorders* (286 per 100 000 person-years [95% CI: 284-  
14 288]) and *depression* (279 per 100 000 person-years [95% CI: 277-281]) (Figure 2 and Suppl. Table 3).  
15  
16  
17

### 18 **Mortality in persons with incident brain disorders**

19  
20  
21 One-year mortality was 7.8% among persons with *any brain disorder*, compared to 1.9% in the comparison  
22 cohort. After adjustment, persons with *any brain disorder* still had almost five-fold increased mortality  
23 (HR=4.7 [95% CI: 4.7-4.8]), and the HRs were increased in every group of brain disorders. One-year  
24 mortality was highest in persons with *other neurodegenerative disorders* (28.0%), *brain tumours* (24.5%),  
25 *stroke* (20.8%), and *dementia* (20.3%). Of note, mortality was more than ten-fold increased in persons with  
26 *other neurodegenerative disorders* (HR of 15.3 [95% CI: 13.2-17.7]), *brain tumours* (HR of 13.2 [95% CI:  
27 12.4-14.0]), and *anxiety disorders* (HR of 12.8 [95% CI: 12.4-13.3]) (Figure 3).  
28  
29  
30  
31  
32  
33  
34  
35  
36  
37

### 38 **Cost-of-illness**

39  
40 The total direct attributable costs of *any brain disorder* were €5.2 billion in 2015 in Denmark, with  
41 increased costs in every group of brain disorders. Specifically, attributable direct costs were highest in  
42 patients with prevalent *depression* (€1.2 billion), *dementia* (€1.1 billion), and *stroke* (€1.0 billion) (Figure 4  
43 and Suppl. Table 4). Importantly, the distribution of cost components varied considerably between brain  
44 disorders (Figure 4 and Figure 5).  
45  
46  
47  
48  
49  
50

51  
52 Of note, the highest attributable costs per person in persons with prevalent brain disorders in 2015 was  
53 found in persons with *dementia* (€30K) and *Parkinson's disease* (€24K), mainly due to costs of nursing  
54 home/sheltered accommodation (Figure 5 and Suppl. Table 4).  
55  
56  
57  
58  
59  
60



1  
2  
3  
4 The average attributable direct costs of *any brain disorder* during the first year after diagnosis was €13K,  
5  
6 though these differed widely between persons with different disorders. Costs were highest during the first  
7  
8 year in persons with incident *brain tumours* (€44K) and *schizophrenia spectrum disorders* (€39K) (Suppl.  
9  
10 Figure 3 and Suppl. Table 4).  
11  
12

13  
14 Productivity of persons with brain disorders was reduced in every group of brain disorders. The total  
15  
16 indirect costs in 2015 were €11.2 billion in persons with *any brain disorder*, mostly due to loss of  
17  
18 productivity associated with illness (€10.9 billion) and less due to loss of productivity due to premature  
19  
20 death (€0.3 billion). Specifically, lost productivity was €3.2 billion in persons with *stress-related disorders*,  
21  
22 €2.9 billion in persons with *depression*, and €2.2 billion in persons with *alcohol abuse*. Finally, we found that  
23  
24 the indirect costs were largely made up of costs due to lost productivity in patients living with illness, while  
25  
26 costs due to lost productivity due to premature death contributed little (Figure 6 and Suppl. Table 5).  
27  
28

### 29 30 **Sensitivity analyses**

31  
32 Adding persons with filled prescriptions to the hospital-diagnosed cohorts, we found that occurrence of  
33  
34 *alcohol abuse*, *bipolar disorder*, and *dementia* increased little, while occurrence of *anxiety disorders*,  
35  
36 *depression*, *headache*, *Parkinson's disease*, and *sleep disorders* increased several-fold (Suppl. Figure 4).  
37  
38

39  
40 Prevalence of *any brain disorders* increased to 30.2%, and total attributable costs in these persons in 2015  
41  
42 were €22.5 billion, of which direct costs were €6.5 billion and indirect costs were €16.0 billion (data not  
43  
44 shown).  
45

46  
47 In the OLS regression, we accounted for comorbid brain disorders when estimating per-person costs  
48  
49 associated with each brain disorder. We found that *dementia* (€23K) and *Parkinson's disease* (€17K) were  
50  
51 associated with the highest per-person additional direct cost-of-illness after adjustment for comorbid brain  
52  
53 disorders (Suppl. Figure 5). Of note, removing outliers (the 99% percentile) changed results considerably,  
54  
55 indicating that the 1% of persons with highest costs-of-illness contributed a considerable share of the total  
56  
57 costs.  
58  
59  
60

## DISCUSSION

We performed a study of occurrence, mortality, and cost of hospital-diagnosed brain disorders using high-quality, individual-level data. Brain disorders were common: one in five persons in Denmark had prevalent brain disorders in 2015. We found the most prevalent disorders to be *traumatic brain injury, stress-related disorders, and depression*, whereas the disorders with the highest incidence were *stress-related disorders, depression, and stroke*. One-year mortality was five-fold increased in persons with *any brain disorder* and was increased in persons with any type of brain disorder. The attributable direct costs of persons with *any brain disorder* were more than €5 billion. The more common brain disorders—*depression, dementia, and stroke*—accounted for the highest total attributable direct costs among persons with prevalent disorders. Attributable direct costs per person were highest in persons with *dementia and Parkinson's disease*. The total attributable indirect costs due to loss of productivity in persons with any prevalent brain disorder were twice as high as direct costs.

Even though our findings are based on high-quality population-based registries, some limitations should be considered when interpreting our findings. We may have underestimated the prevalence, incidence, and total cost of non-severe brain disorders, as some patients were treated solely in general practice, or were undiagnosed or untreated. This is especially relevant for disorder that are mainly treated in primary care, or not treated at all, and therefore were not captured in our main analyses such as *anxiety*,<sup>22</sup> *headache*,<sup>23</sup> and *sleep disorders*.<sup>24</sup> We addressed this in a sensitivity analysis that also identified patient-based filled prescriptions for relevant medications.

We estimated the period prevalence among living persons who had been diagnosed with brain disorders during the preceding 20 years, even though some disorders may be reversible. We chose this approach as a period with severe disease may affect future income and use of healthcare services.

We described non-mental comorbidity as the proportions of persons in each cohort previously diagnosed with diseases from the CCI covering 19 groups of disorders. CCI score was used to adjust for confounding in

1  
2  
3  
4 our mortality analyses, and as CCI score is an aggregated measure of comorbidity we cannot rule out  
5  
6 residual or unmeasured confounding in our estimates of HRs of death.<sup>17, 18, 25</sup>  
7  
8

9 While we had detailed data on direct costs, we lacked information on municipally supported rehabilitation,  
10  
11 assistance supplies, and transportation costs related to treatment and rehabilitation. Similarly, our cost  
12  
13 analyses did not include intangible costs (*e.g.*, due to decreased quality of life) and costs of informal care  
14  
15 provided by relatives, which may be considerable in conditions such as *dementia*.<sup>26</sup> Yet, we included costs  
16  
17 of nursing homes, sheltered accommodation, and home nursing, and we found the annual cost per person  
18  
19 with *dementia* (€30K) similar to that previously reported in developed countries.<sup>27, 28</sup>  
20  
21  
22

23 In estimating the indirect costs (*i.e.* loss of productivity) of illness and premature death we applied the  
24  
25 human capital approach. In the literature, this approach has been discussed and among others it has been  
26  
27 argued that application of the human capital approach leads to an over-estimation of the productivity  
28  
29 costs. Hence, alternative methods like the friction cost method have been proposed.<sup>19</sup> The idea behind the  
30  
31 friction cost method is that the amount of production lost due to disease depends on the time (friction  
32  
33 period) organizations need to restore the initial production level. Friction periods will differ by industry,  
34  
35 type of work etc. and the challenge is to estimate relevant friction periods but application of the friction  
36  
37 cost method leads to lower productivity cost estimates.<sup>19</sup> Taking these considerations into account, we  
38  
39 present our indirect cost estimates separately (Figure 6) making it possible to assess the results without  
40  
41 inclusion of the indirect costs.  
42  
43  
44  
45

46 Of note, our study described the cost-of-illness in patients with brain disorders, but did not isolate the cost  
47  
48 of the disease itself as patients with brain disorders are known to have a high load of comorbidity.<sup>29-31</sup>  
49  
50

51 We estimated the prevalence and incidence of *any brain disorder* using individual-level data, which allowed  
52  
53 us to capture concurrent brain disorders,<sup>29</sup> opposed to the prior studies based on literature reviews that  
54  
55 included a mix of hospital-diagnosed disorders and disorders reported in population surveys.<sup>3, 5</sup> Beside  
56  
57 using different eligibility criteria, double counting of individuals with concurrent brain disorders may  
58  
59  
60

1  
2  
3  
4 explain the previously reported total 1-year prevalence of brain disorders of ~50% (260 million affected  
5 among 514 million population in Europe),<sup>3</sup> which is markedly higher than what we found despite including  
6 prevalent disorders during a 20-year period.<sup>8,9</sup> Compared to the reported prevalence of separate disorders,  
7 we found markedly lower prevalence of anxiety (1.7% vs 12%), headache (1.7% vs 10%), depression (3.2%  
8 vs 6.5%), and sleep disorders (1.1% vs 8.7%), despite the longer lookback in our study (20-years vs. 1-year  
9 prevalence).<sup>3</sup> This may be explained by different data sources, as we in the main analyses only included  
10 persons with hospital-diagnosed disorders. Importantly, when we included persons with filled prescriptions  
11 in sensitivity analyses, the prevalence increased considerably indicating that we underestimated the  
12 occurrence of these disorders in our main analyses.  
13  
14

15  
16  
17  
18  
19  
20  
21  
22  
23  
24  
25 A recent Danish study reported a 2.5-fold increased mortality rate in persons with hospital-diagnosed  
26 mental disorders compared to persons from the general population,<sup>32</sup> which is markedly lower than  
27 mortality of *any brain disorders* in our study – likely explained by our use of different length of follow-up  
28 (*i.e.*, long-term as opposed to 1-year).  
29  
30  
31  
32

33  
34 We found that the total attributable direct and indirect costs of brain disorders in Denmark in 2015 were  
35 €16.4 billion, equivalent to 5.9% of the Danish GDP (€273 billion in 2015).<sup>33</sup> This is only slightly higher than  
36 the recently reported costs of mental illness alone of €15 billion in Denmark in 2015 corresponding to 5.4%  
37 of the GDP.<sup>5</sup> However, when we included persons identified from filled prescriptions in addition to hospital-  
38 based diagnoses in sensitivity analyses, the prevalence increased and total attributable costs of *any brain*  
39 *disorders* increased substantially, indicating that the costs may be higher than previously estimated when  
40 not restricting to hospital-diagnosed persons.<sup>3,5</sup>  
41  
42  
43  
44  
45  
46  
47  
48  
49

50 Finally, previous Danish studies of selected brain disorders reported lower total costs of disorders such as  
51 dementia,<sup>26</sup> stroke,<sup>34</sup> Parkinson's disease,<sup>35</sup> and epilepsy.<sup>36</sup> These studies did not include costs of home  
52 nursing and nursing homes, and when accounting for that, our findings are comparable.<sup>26,34-36</sup>  
53  
54  
55  
56  
57  
58  
59  
60

1  
2  
3  
4 As the already large burden of brain disorders is expected to increase in the future,<sup>6</sup> prevention and  
5  
6 effective early intervention are essential.<sup>5</sup> The potential to prevent stroke, infections of the central nervous  
7  
8 system, and mental disorders is established, whereas the potential to prevent other neurological disorders  
9  
10 remains unclear.<sup>37, 38</sup> As comorbidity load is substantial in persons with brain disorders, cost-of-illness may  
11  
12 be reduced by preventing and improving treatment of comorbid disorders.<sup>31</sup>  
13  
14

15  
16 We found that one in five persons alive in Denmark had been diagnosed with a brain disorder. One-year  
17  
18 mortality was five-fold increased in persons with an incident brain disorder. Mortality was increased in  
19  
20 every group of brain disorders, underscoring the illness of these patients. The severity also was reflected in  
21  
22 the very high cost-of-illness in persons with brain disorders, with total attributable costs of €16.4 billion in  
23  
24 Denmark in 2015, including direct costs of €5.2 billion and indirect costs of €11.2 billion.  
25  
26

27 Occurrence of brain disorders is expected to increase in the future. As brain disorders already use a large  
28  
29 proportion of healthcare resources and come with high indirect costs, effective prevention and intervention  
30  
31 strategies must be developed.  
32  
33

## 34 35 36 **ACKNOWLEDGEMENTS**

37  
38 We are grateful to the Board of Clinical Specialists in Neurology and Psychiatry for its invaluable input on  
39  
40 the definitions of brain disorders and its feedback on preliminary analyses. Specifically, we would like to  
41  
42 thank Prof. Grethe Andersen, Prof. Ulrik Becker, Prof. Niels Bilenberg, Assoc. Prof. Jakob Christensen, Prof.  
43  
44 Per Fink, Prof. David Gaist, Prof. Poul Jørgen Jennum, Assoc. Prof. Nils Koch-Henriksen, Prof. Jørgen  
45  
46 Feldbæk Nielsen, Prof. Søren Dinesen Østergaard, and Prof. John Rosendahl Østergaard for providing great  
47  
48 clinical expertise concerning our codebook. Also, we are grateful of the contributions of Anne Staub  
49  
50 Rasmussen to the first version of the codebook. Thanks to Prof. John McGrath for input on the project and  
51  
52 inspiration to visual presentation of the data. Finally, a huge thanks to Helle Vester for great project  
53  
54 management and for neat proofreading of the manuscript.  
55  
56  
57  
58  
59  
60

## CONTRIBUTIONS

CFC and HTS contributed to the study conception. CFC, HTS, NS, JO, SS, TBR, and SVV designed the study and wrote a statistical analyses plan. NS, JO, and SS outlined the economic methods, and SS and JO performed the data management and analyses of the economic data. TBR performed the remaining data management and analyses, and performed all final analyses. All authors interpreted the results, and TBR, SVV, and CFC visualized the data. SVV drafted the first manuscript, and all authors revised the manuscript and approved the final version. All authors agree to be accountable for all aspects of the work.

## COMPETING INTERESTS

The authors have no specific competing interests to declare.

## FUNDING

This work was supported by a grant from Lundbeckfonden (grant no. R248-2017-521).

## ETHICAL APPROVAL

Not required.

## DATA SHARING

Data are available as presented in the paper and in the Supporting Information files. According to Danish legislation, our approvals to use the Danish data sources for the current study do not allow us to distribute or make patient data directly available to other parties. Data access and information about availability is accessible through Statistics Denmark (website: <https://www.dst.dk/en/TilSalg/Forskningservice>, e-mail: [dst@dst.dk](mailto:dst@dst.dk)).

## Figure Legends

**Figure 1. Characteristics of patients with prevalent brain disorders in Denmark in 2015 sorted from highest to lowest prevalence (the white line in the age distribution represents the median age in each cohort).**

Abbreviations: CNS, central nervous system; CCI, Charlson Comorbidity Index

**Figure 2. Occurrence of brain disorders in the Danish population sorted from highest to lowest incidence, including incidence during 2011-2015 and prevalence in 2015.**

Abbreviations: CNS, central nervous system

**Figure 3. One-year mortality in patients with incident brain disorders in Denmark during 2011-2015 compared with the general population (comparison group). Hazard ratios are adjusted for age, sex, and comorbidity score. Specific disorders are sorted by hazard ratios.**

Abbreviations: CI, confidence interval; CNS, central nervous system

**Figure 4. Total attributable direct costs in persons with prevalent brain disorders in Denmark in 2015 (in 2015 prices) sorted from highest to lowest costs.**

Abbreviations: CNS, central nervous system

**Figure 5. Attributable direct costs per person in individuals with prevalent brain disorders in Denmark in 2015 (in 2015 prices) sorted from highest to lowest costs.**

Abbreviations: CNS, central nervous system

**Figure 6. Total attributable indirect costs due to lost productivity in persons with prevalent brain disorders in Denmark in 2015 (in 2015 prices) sorted from highest to lowest costs.**

Abbreviations: CNS, central nervous system

## References

1. GBD 2015 Neurological Disorders Collaborator Group. Global, regional, and national burden of neurological disorders during 1990–2015: a systematic analysis for the Global Burden of Disease Study 2015. *The Lancet Neurology* 2017;16(11):877-97. doi: [https://doi.org/10.1016/S1474-4422\(17\)30299-5](https://doi.org/10.1016/S1474-4422(17)30299-5)
2. Whiteford HA, Ferrari AJ, Degenhardt L, et al. The global burden of mental, neurological and substance use disorders: an analysis from the Global Burden of Disease Study 2010. *PLoS One* 2015;10(2):e0116820. doi: 10.1371/journal.pone.0116820
3. Gustavsson A, Svensson M, Jacobi F, et al. Cost of disorders of the brain in Europe 2010. *Eur Neuropsychopharmacol* 2011;21(10):718-79. doi: 10.1016/j.euroneuro.2011.08.008
4. Olesen J, Gustavsson A, Svensson M, et al. The economic cost of brain disorders in Europe. *Eur J Neurol* 2012;19(1):155-62. doi: 10.1111/j.1468-1331.2011.03590.x
5. OECD EU. Health at a Glance: Europe 2018: State of Health in the EU Cycle. Paris/European Union, Brussels.2018:212. doi: [https://doi.org/10.1787/health\\_glance\\_eur-2018-en](https://doi.org/10.1787/health_glance_eur-2018-en)
6. Bloom DE, Cafiero, E.T., Jané-Llopis, E., Abrahams-Gessel, S., Bloom, L.R., Fathima, S., Feigl, A.B., Gaziano, T., Mowafi, M., Pandya, A., Prettner, K., Rosenberg, L., Seligman, B., Stein, A., & Weinstein, C. The Global Economic Burden of Non-communicable Diseases. Geneva: World Economic Forum, 2011. Available from: <http://apps.who.int/medicinedocs/documents/s18806en/s18806en.pdf> accessed 12 Dec 2019.
7. Trautmann S, Rehm J, Wittchen HU. The economic costs of mental disorders: Do our societies react appropriately to the burden of mental disorders? *EMBO Rep* 2016;17(9):1245-9. doi: 10.15252/embr.201642951
8. Sørensen HT. Global burden of neurological disorders: challenges and opportunities with the available data. *The Lancet Neurology* 2019;18(5):420-21. doi: 10.1016/S1474-4422(19)30027-4
9. Vigo D, Thornicroft G, Atun R. Estimating the true global burden of mental illness. *Lancet Psychiatry* 2016;3(2):171-8. doi: 10.1016/s2215-0366(15)00505-2
10. Schmidt M, Schmidt SAJ, Adelborg K, et al. The Danish health care system and epidemiological research: from health care contacts to database records. *Clin Epidemiol* 2019;11:563-91. doi: 10.2147/clep.S179083
11. Heide-Jørgensen U, Adelborg K, Kahlert J, et al. Sampling strategies for selecting general population comparison cohorts. *Clin Epidemiol* 2018;10:1325-37. doi: 10.2147/clep.S164456
12. Schmidt M, Schmidt SA, Sandegaard JL, et al. The Danish National Patient Registry: a review of content, data quality, and research potential. *Clinical epidemiology* 2015;7:449-90. doi: 10.2147/CLEP.S91125 [doi]
13. Andersen JS, Olivarius Nde F, Krasnik A. The Danish National Health Service Register. *Scand J Public Health* 2011;39(7 Suppl):34-7. doi: 10.1177/1403494810394718



14. Pottegard A, Schmidt SAJ, Wallach-Kildemoes H, et al. Data Resource Profile: The Danish National Prescription Registry. *Int J Epidemiol* 2017;46(3):798-98f. doi: 10.1093/ije/dyw213
15. Statistics Denmark. Documentation of statistics [cited 2019 12/12]. Available from: <https://www.dst.dk/en/Statistik/dokumentation/documentationofstatistics> accessed 12 Dec 2019.
16. Ankjaer-Jensen A, Rosling P, Bilde L. Variable prospective financing in the Danish hospital sector and the development of a Danish case-mix system. *Health care management science* 2006;9(3):259-68.
17. Charlson ME, Pompei P, Ales KL, et al. A new method of classifying prognostic comorbidity in longitudinal studies: development and validation. *J Chronic Dis* 1987;40(5):373-83.
18. Thygesen SK, Christiansen CF, Christensen S, et al. The predictive value of ICD-10 diagnostic coding used to assess Charlson comorbidity index conditions in the population-based Danish National Registry of Patients. *BMC Med Res Methodol* 2011;11:83. doi: 10.1186/1471-2288-11-83
19. Drummond M, Sculpher MJ, Claxton K, Stoddart GL, Torrance GW. Methods for the economic evaluation of health care programmes. 3. ed. ed. Oxford: Oxford University Press 2005.
20. Drummond MF, McGuire A. Economic evaluation in health care : merging theory with practice. New York: Oxford University Press 2001.
21. Wickham H, Averick M, Bryan J, et al. Welcome to the Tidyverse. *Journal of Open Source Software* 2019;4(43):1686. doi: 10.21105/joss.01686
22. Alonso J, Angermeyer MC, Bernert S, et al. Prevalence of mental disorders in Europe: results from the European Study of the Epidemiology of Mental Disorders (ESEMeD) project. *Acta Psychiatr Scand Suppl* 2004(420):21-7. doi: 10.1111/j.1600-0047.2004.00327.x
23. Stovner L, Andrée C. Prevalence of headache in Europe: A review for the Eurolight project. *The journal of headache and pain* 2010;11:289-99. doi: 10.1007/s10194-010-0217-0
24. Kerkhof GA. Epidemiology of sleep and sleep disorders in The Netherlands. *Sleep Med* 2017;30:229-39. doi: 10.1016/j.sleep.2016.09.015
25. Schneeweiss S, Seeger JD, Maclure M, et al. Performance of Comorbidity Scores to Control for Confounding in Epidemiologic Studies using Claims Data. *American Journal of Epidemiology* 2001;154(9):854-64. doi: 10.1093/aje/154.9.854
26. Frahm-Falkenberg S, Ibsen R, Kjellberg J, et al. Health, social and economic consequences of dementias: a comparative national cohort study. *European journal of neurology* 2016;23(9):1400-07. doi: 10.1111/ene.13043
27. Schaller S, Mauskopf J, Kriza C, et al. The main cost drivers in dementia: a systematic review. *Int J Geriatr Psychiatry* 2015;30(2):111-29. doi: 10.1002/gps.4198
28. Cantarero-Prieto D, Leon PL, Blazquez-Fernandez C, et al. The economic cost of dementia: A systematic review. *Dementia (London)* 2019:1471301219837776. doi: 10.1177/1471301219837776

- 1  
2  
3  
4 29. Plana-Ripoll O, Pedersen CB, Holtz Y, et al. Exploring Comorbidity Within Mental Disorders Among a  
5 Danish National Population. *JAMA Psychiatry* 2019;76(3):259-70. doi:  
6 10.1001/jamapsychiatry.2018.3658  
7  
8  
9 30. Barnett K, Mercer SW, Norbury M, et al. Epidemiology of multimorbidity and implications for health  
10 care, research, and medical education: a cross-sectional study. *Lancet* 2012;380(9836):37-43. doi:  
11 10.1016/S0140-6736(12)60240-2  
12  
13 31. Lawrence D, Hancock KJ, Kisely S. The gap in life expectancy from preventable physical illness in  
14 psychiatric patients in Western Australia: retrospective analysis of population based registers. *BMJ :  
15 British Medical Journal* 2013;346:f2539. doi: 10.1136/bmj.f2539  
16  
17 32. Plana-Ripoll O, Pedersen CB, Agerbo E, et al. A comprehensive analysis of mortality-related health  
18 metrics associated with mental disorders: a nationwide, register-based cohort study. *The Lancet*  
19 2019 doi: 10.1016/S0140-6736(19)32316-5  
20  
21 33. Statistics Denmark. Annual national accounts [cited 2019 12/12]. Available from:  
22 [https://www.dst.dk/en/Statistik/emner/nationalregnskab-og-offentlige-finanser/aarligt-](https://www.dst.dk/en/Statistik/emner/nationalregnskab-og-offentlige-finanser/aarligt-nationalregnskab)  
23 [nationalregnskab](https://www.dst.dk/en/Statistik/emner/nationalregnskab-og-offentlige-finanser/aarligt-nationalregnskab) accessed 12 Dec 2019.  
24  
25 34. Jennum P, Iversen HK, Ibsen R, et al. Cost of stroke: a controlled national study evaluating societal  
26 effects on patients and their partners. *BMC Health Serv Res* 2015;15:466-66. doi: 10.1186/s12913-  
27 015-1100-0  
28  
29 35. Jennum P, Zoetmulder M, Korbo L, et al. The health-related, social, and economic consequences of  
30 parkinsonism: a controlled national study. *J Neurol* 2011;258(8):1497-506. doi: 10.1007/s00415-  
31 011-5969-1  
32  
33 36. Jennum P, Sabers A, Christensen J, et al. Welfare consequences for people with epilepsy and their  
34 partners: A matched nationwide study in Denmark. *Seizure* 2017;49:17-24. doi:  
35 10.1016/j.seizure.2017.05.007  
36  
37 37. Arango C, Díaz-Caneja CM, McGorry PD, et al. Preventive strategies for mental health. *The Lancet*  
38 *Psychiatry* 2018;5(7):591-604. doi: 10.1016/S2215-0366(18)30057-9  
39  
40 38. Rudd AG, Wolfe CDA, Howard RS. Prevention of neurological disease in later life. *Journal of Neurology,  
41 Neurosurgery & Psychiatry* 1997;63(suppl 1):S39-S52. doi: 10.1136/jnnp.63.2008.39S  
42  
43  
44  
45  
46  
47  
48  
49  
50  
51  
52  
53  
54  
55  
56  
57  
58  
59  
60

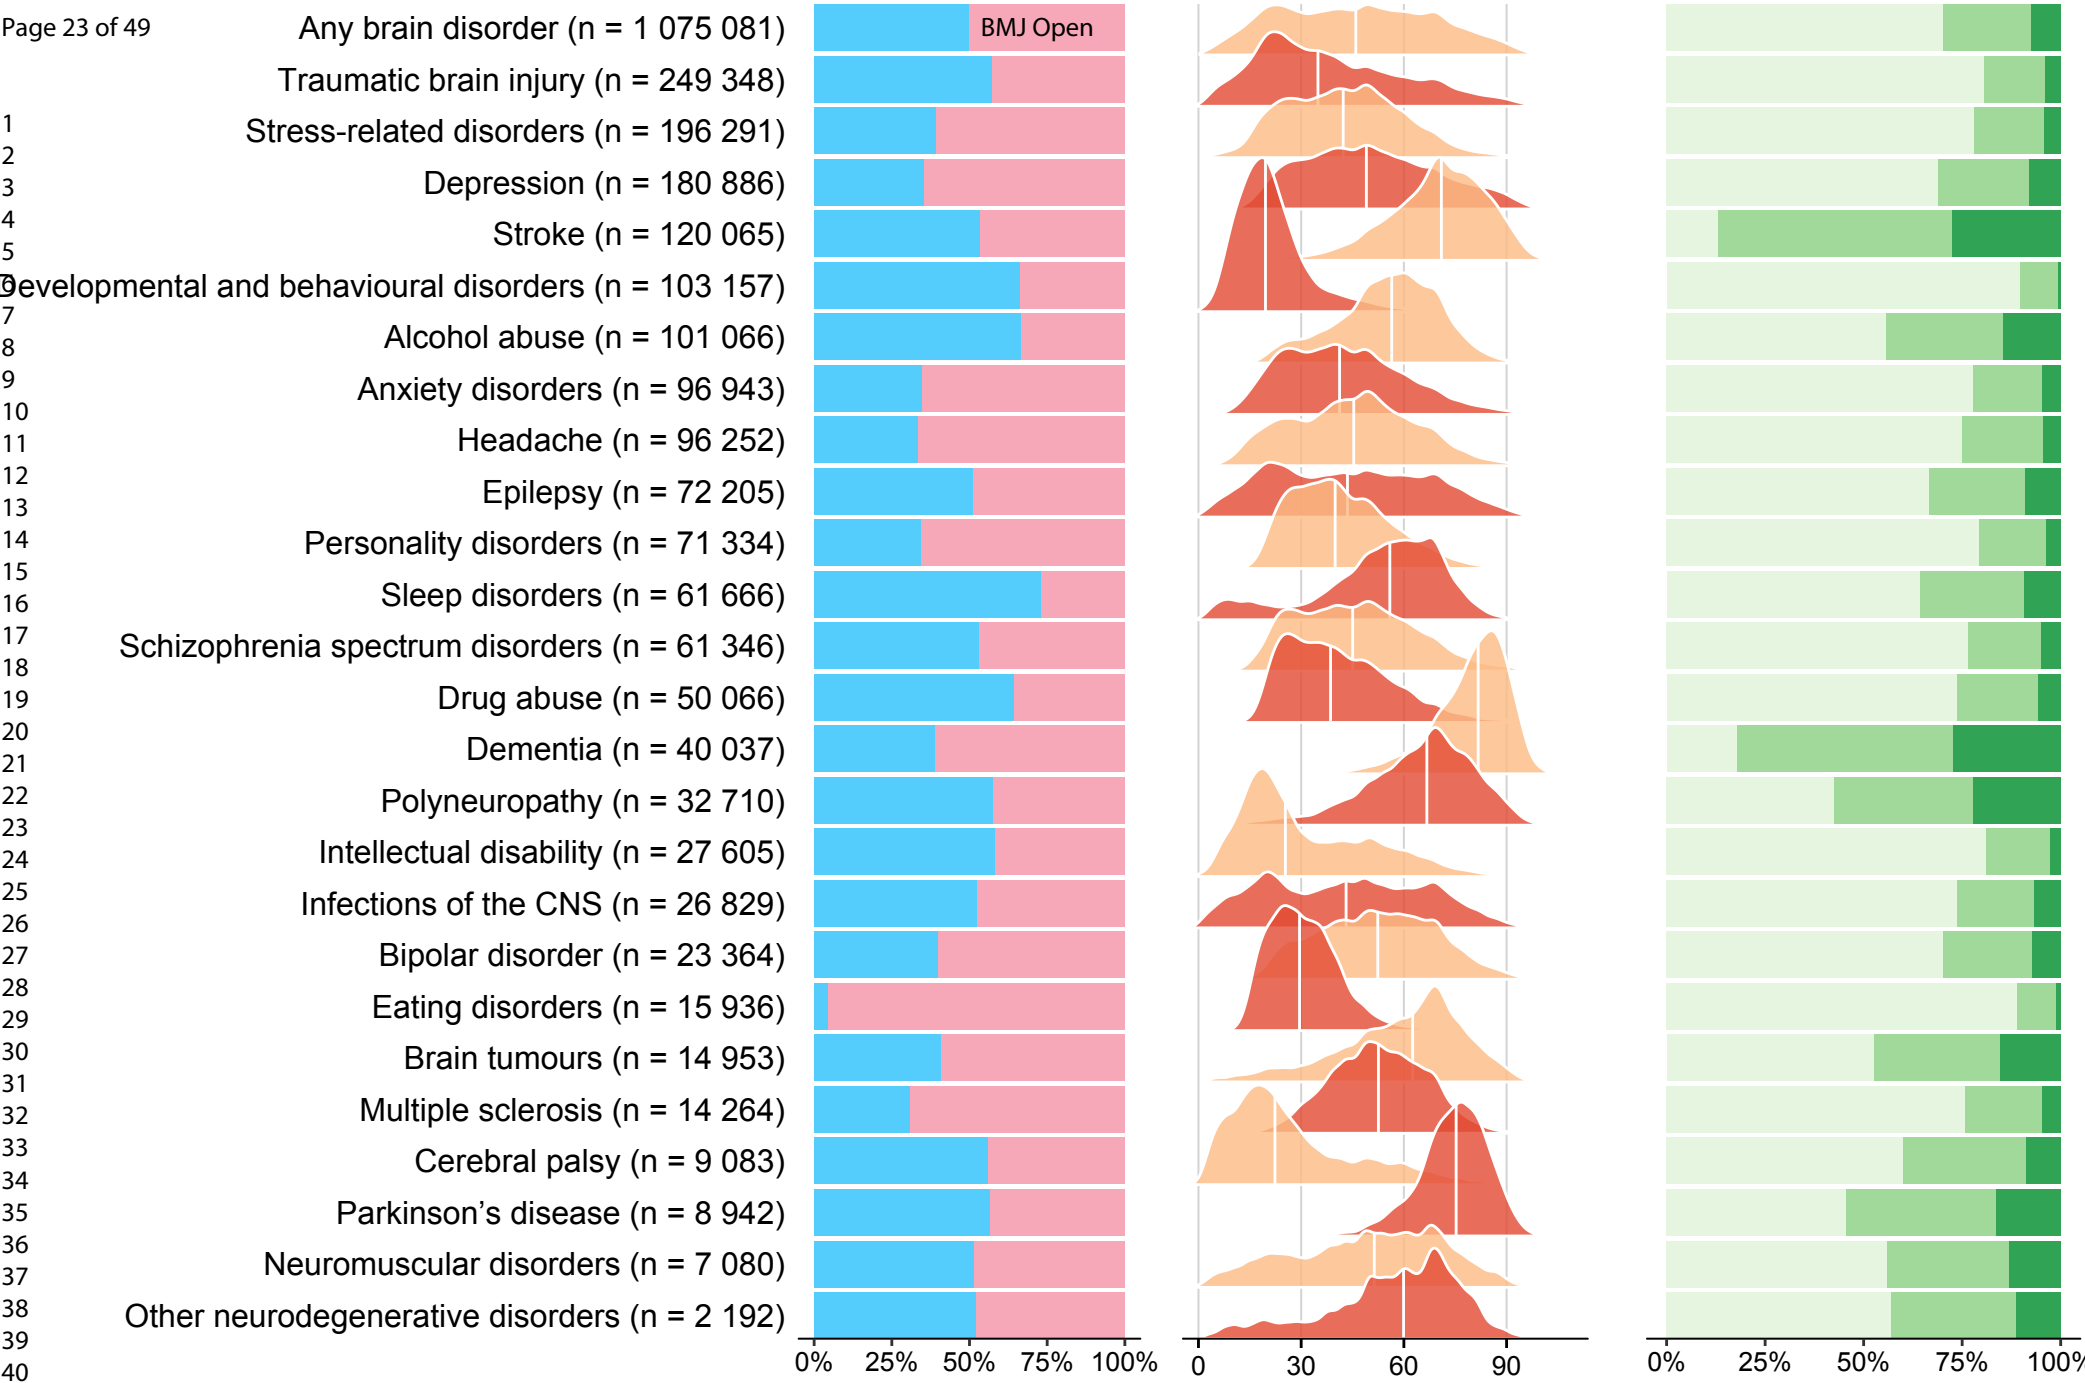

For peer review only - <http://bmjopen.bmj.com/site/about/guidelines.xhtml>

Sex Male Female Age CCI 0 1-2 +3

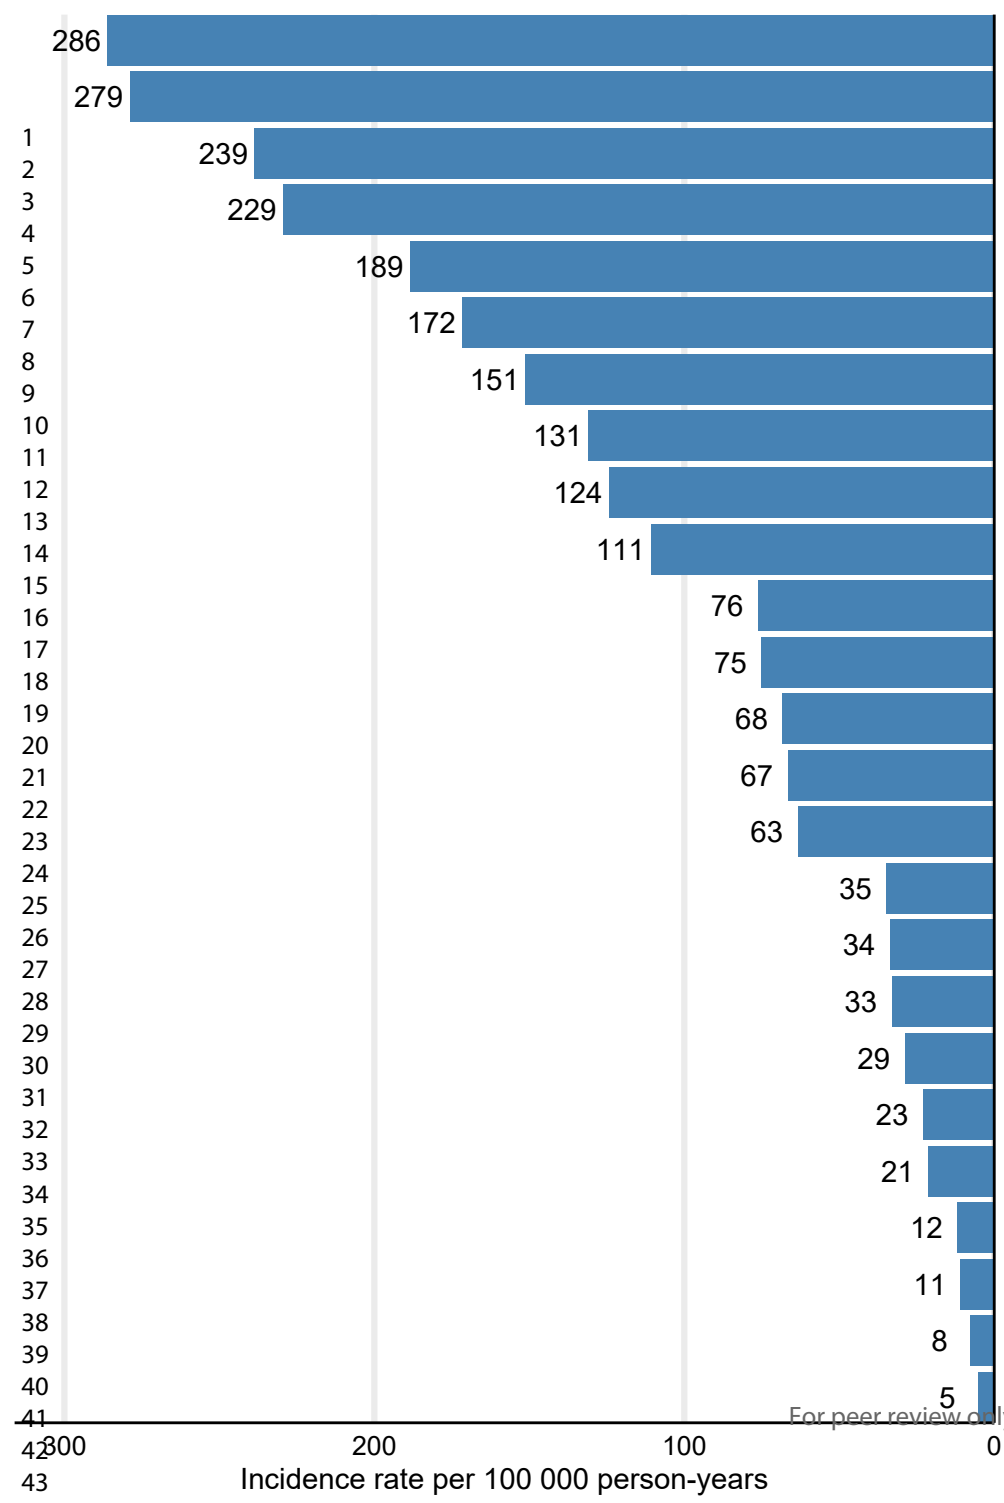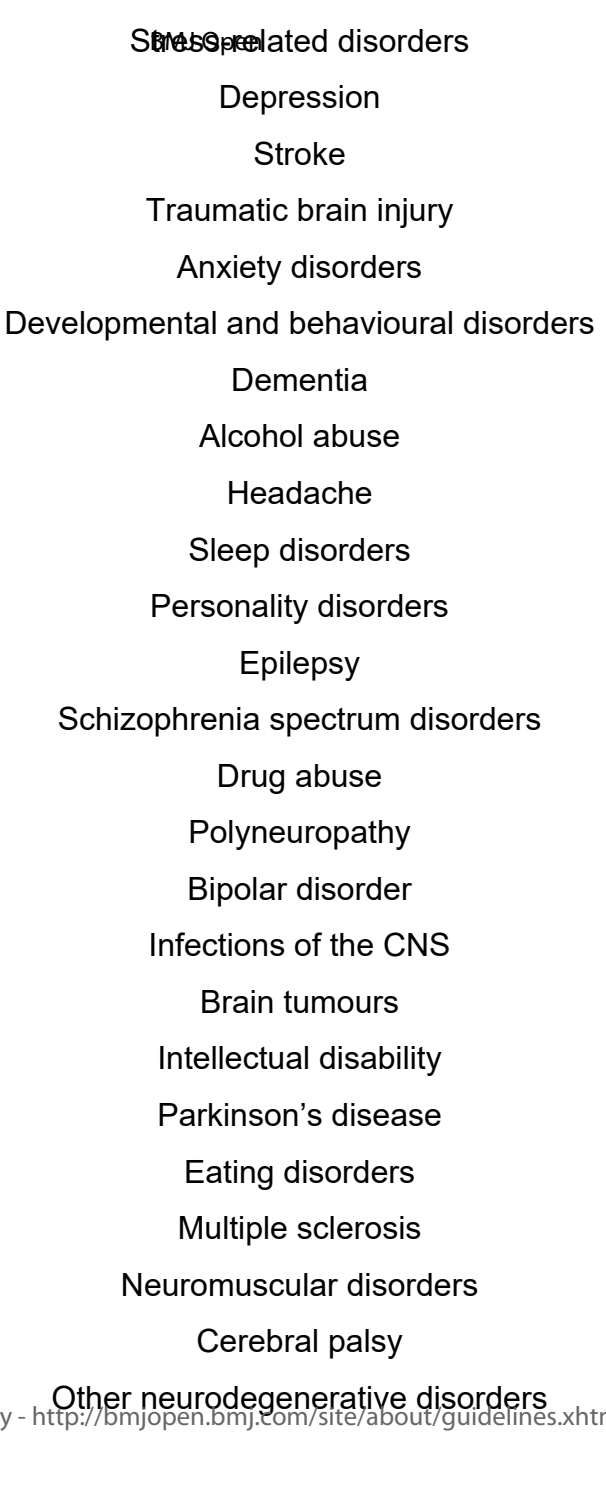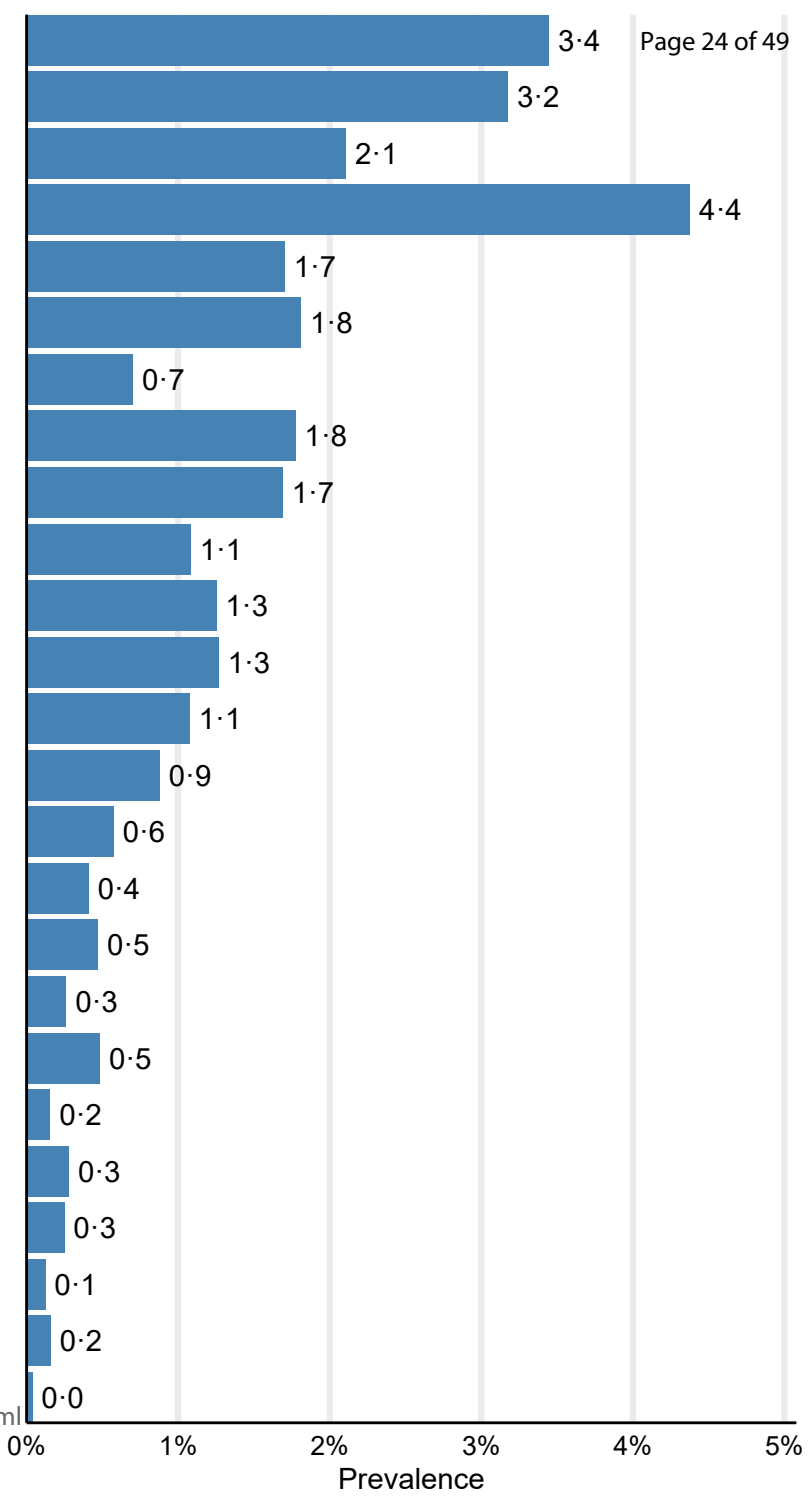

1  
2  
3  
4  
5  
6  
7  
8  
9  
10  
11  
12  
13  
14  
15  
16  
17  
18  
19  
20  
21  
22  
23  
24  
25  
26  
27  
28  
29  
30  
31  
32  
33  
34  
35  
36  
37  
38  
39  
40  
41  
42  
43  
44  
45  
46  
47

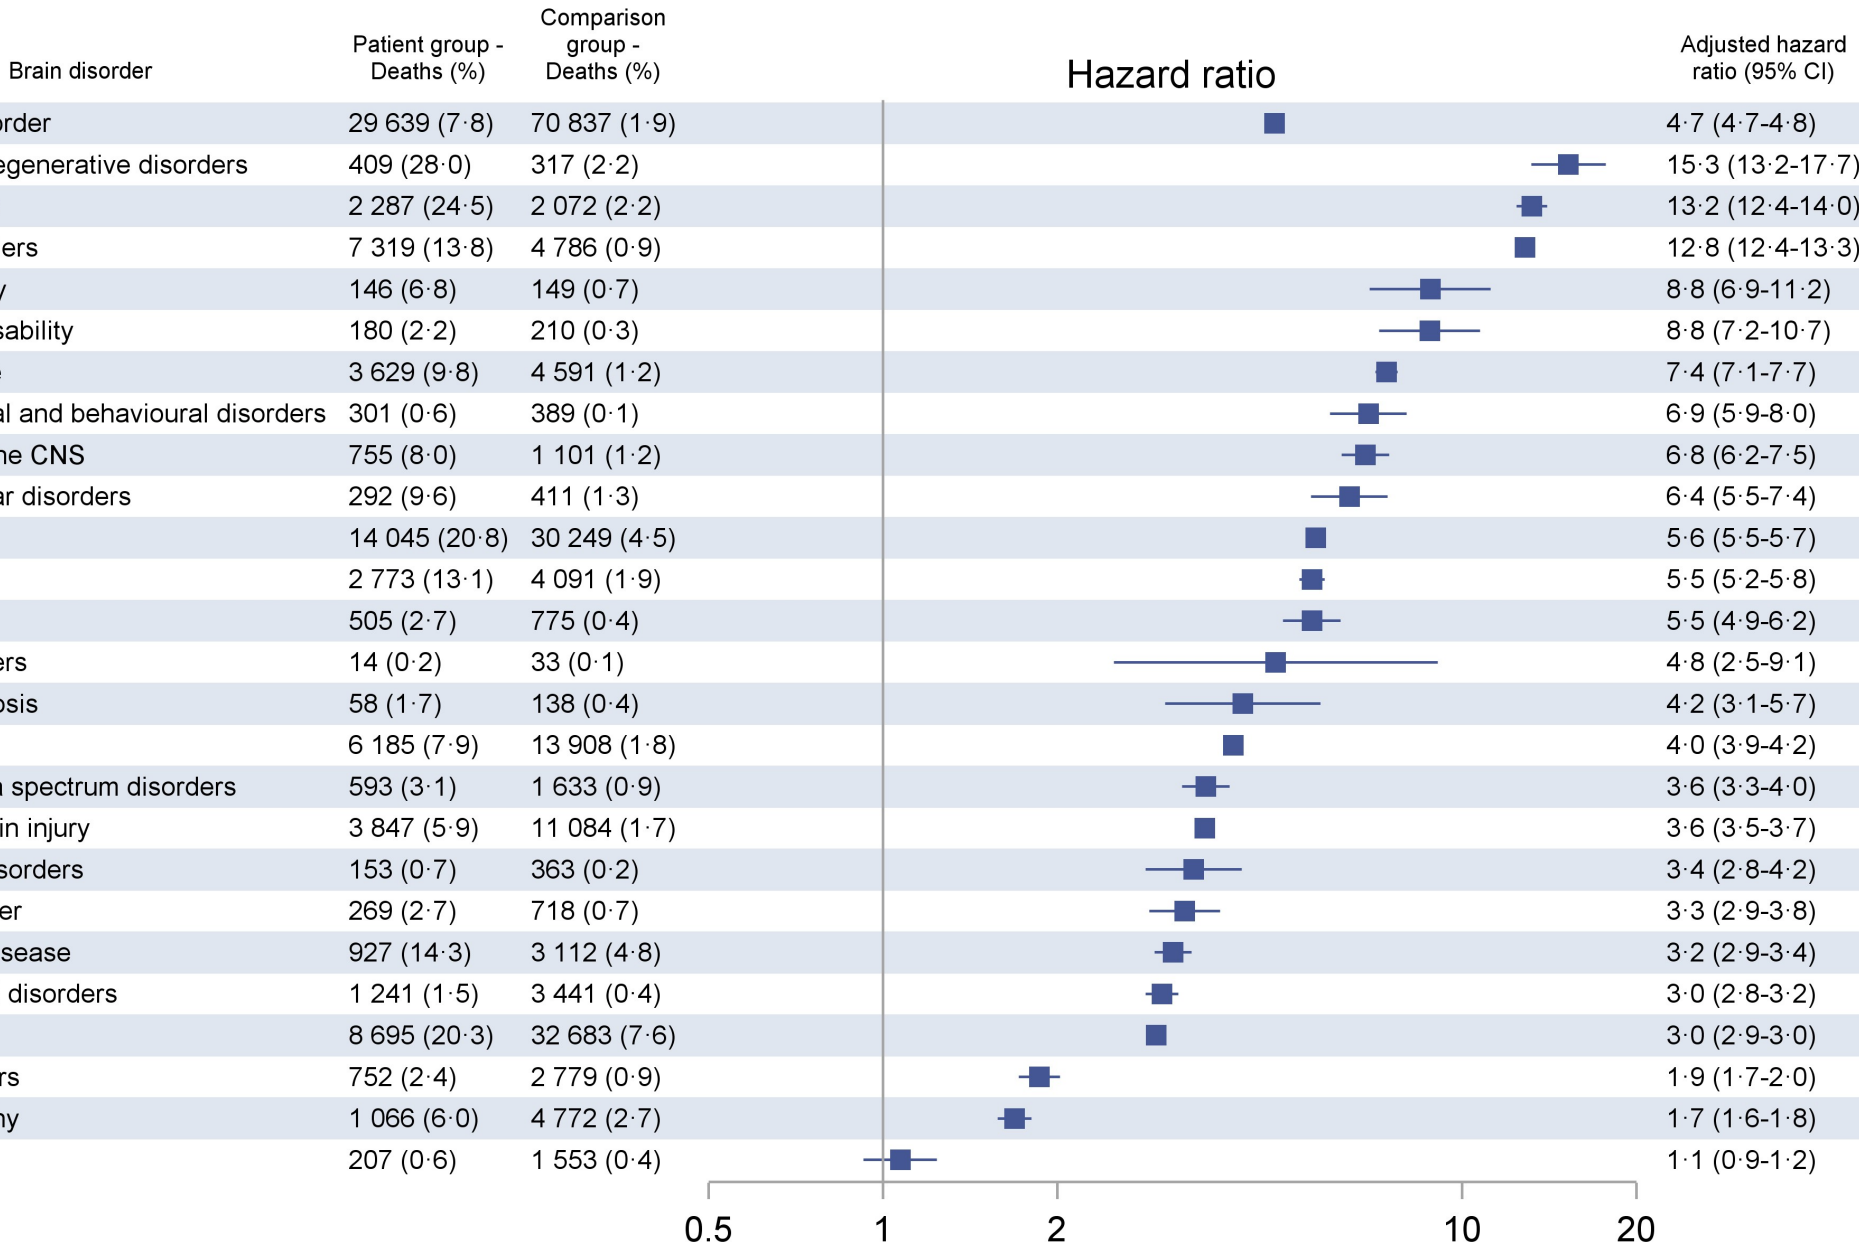

BMJ Open

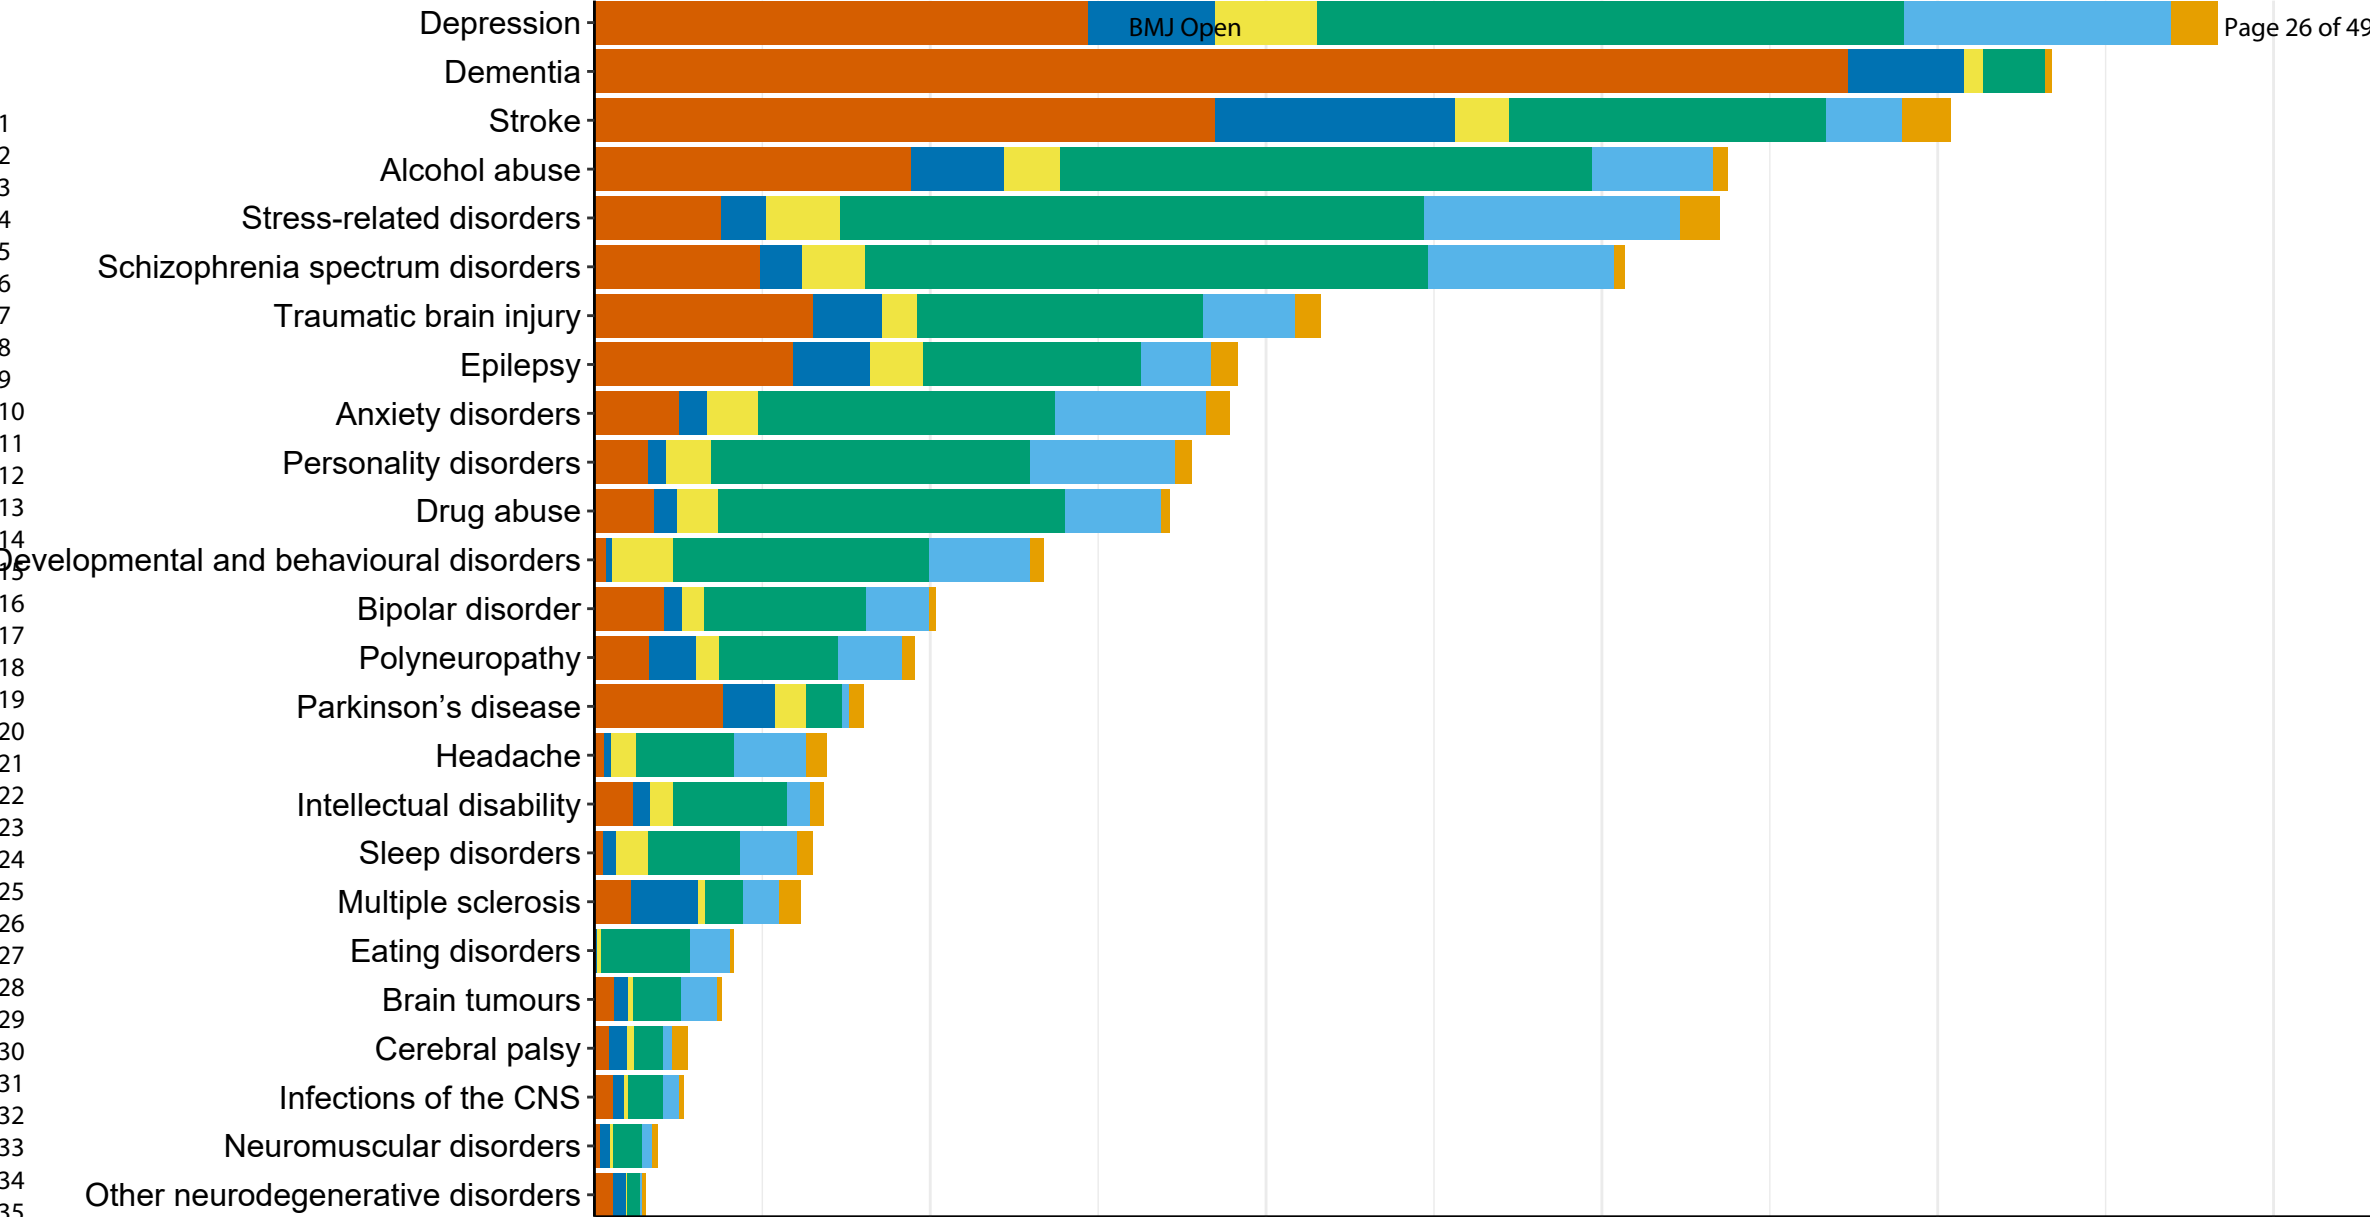

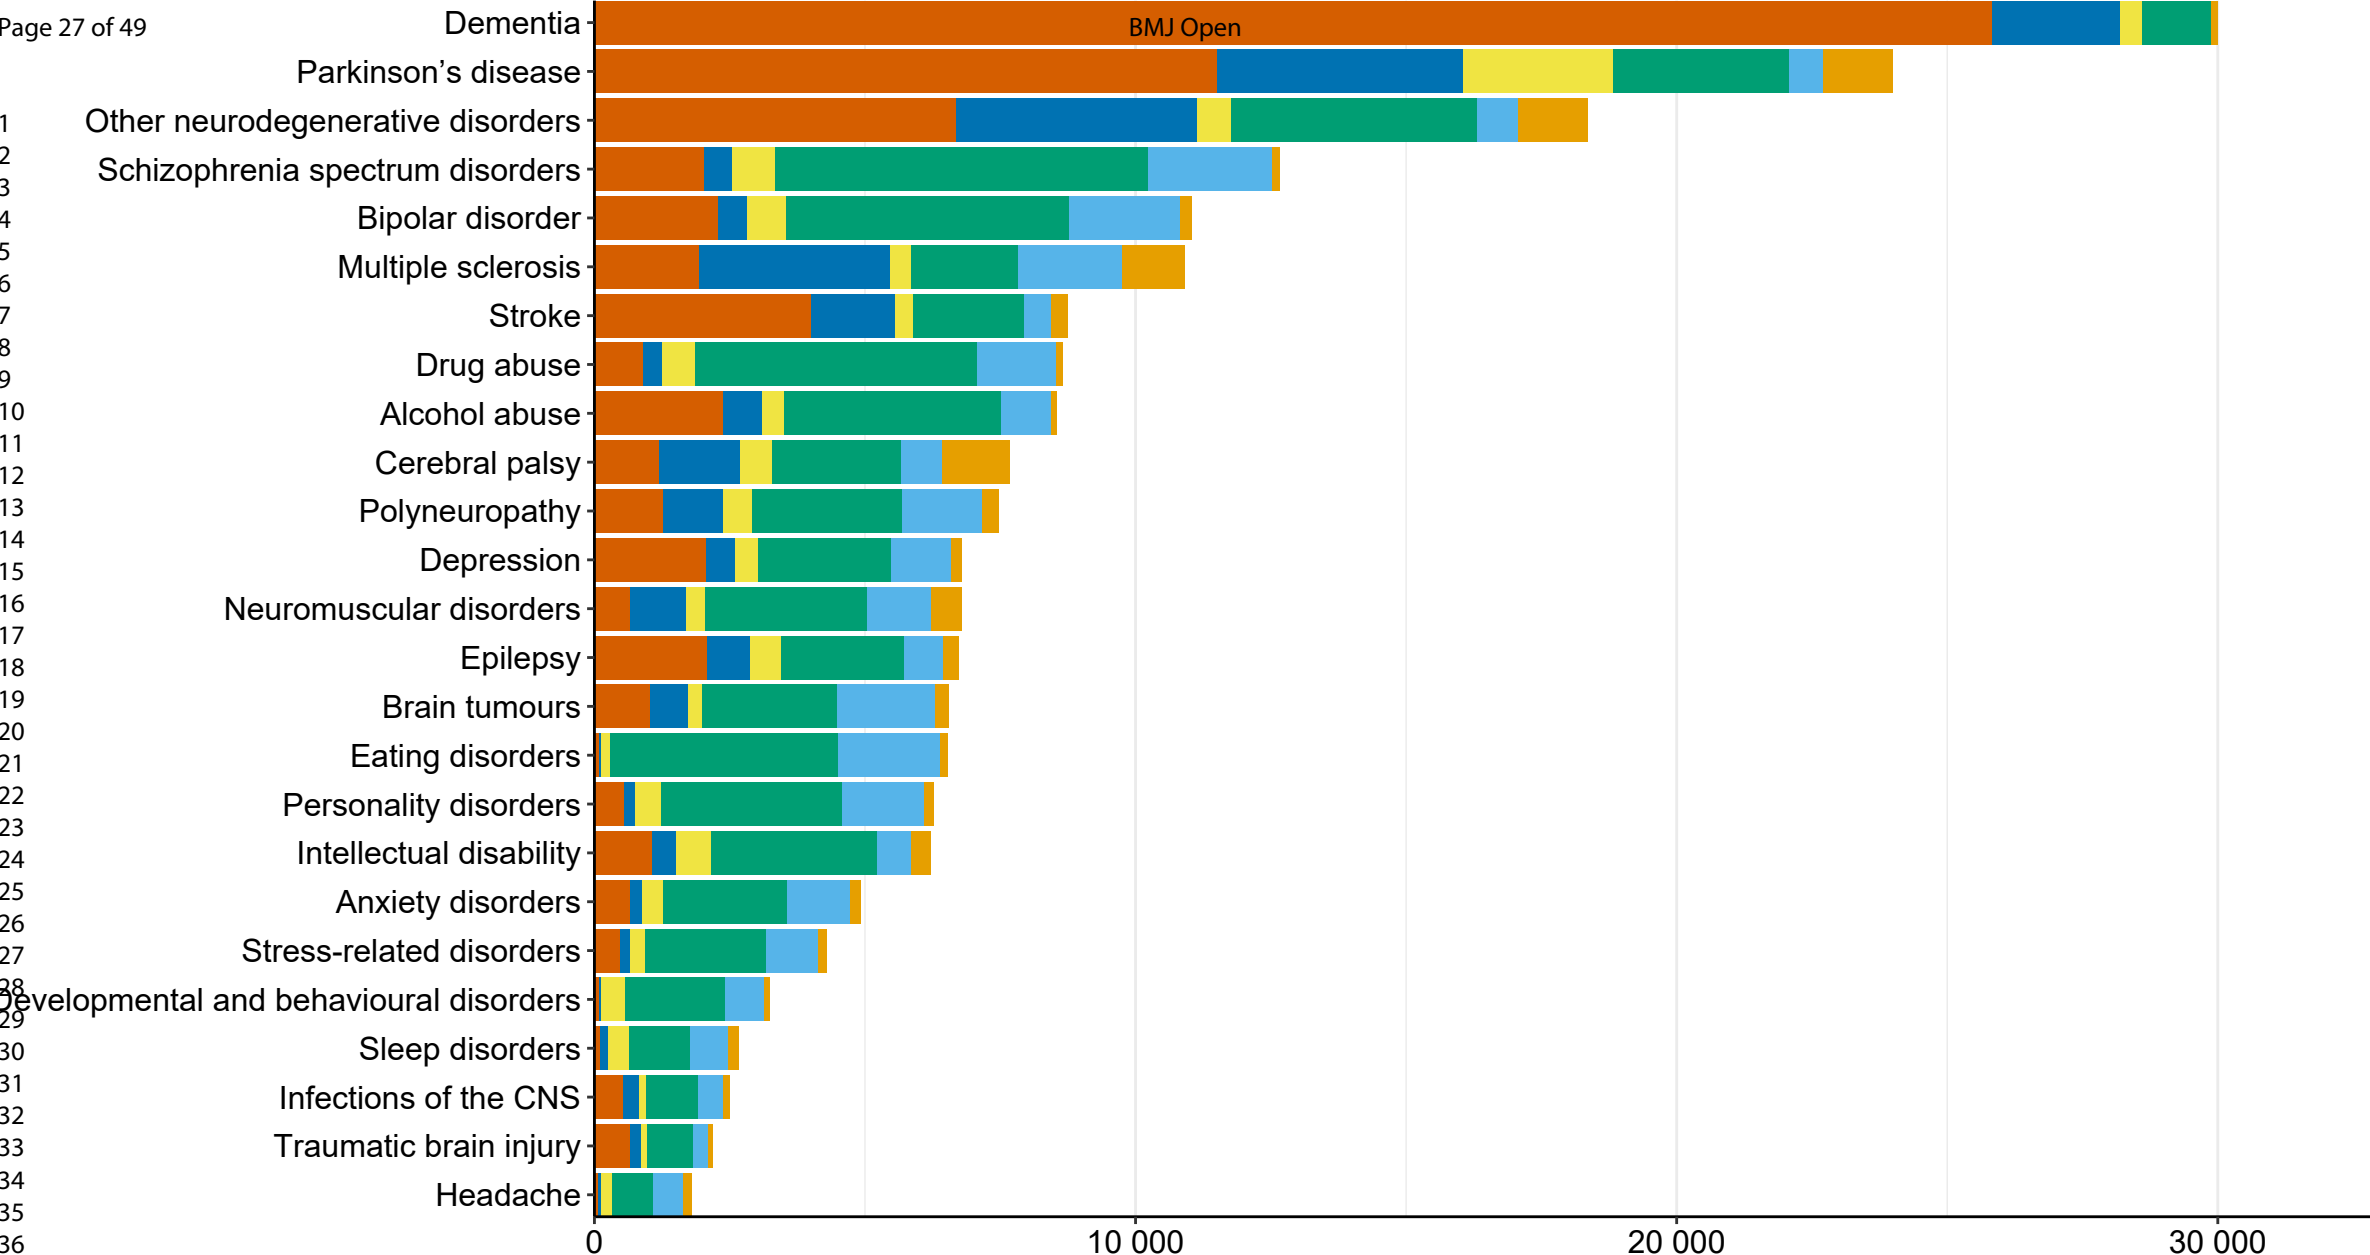

For peer review only - <http://bmjopen.bmj.com/site/about/guidelines.xhtml>

■ Nursing home / sheltered accomodation    
 ■ Home care    
 ■ Filled prescriptions  
■ Secondary sector - Inpatient    
 ■ Secondary sector - Outpatient    
■ Primary sector

1  
2  
3  
4  
5  
6  
7  
8  
9  
10  
11  
12  
13  
14  
15  
16  
17  
18  
19  
20  
21  
22  
23  
24  
25  
26  
27  
28  
29  
30  
31  
32  
33  
34  
35  
36  
37  
38  
39  
40  
41  
42  
43  
44

Depression  
Alcohol abuse  
Schizophrenia spectrum disorders  
Personality disorders  
Anxiety disorders  
Drug abuse  
Traumatic brain injury  
Developmental and behavioural disorders  
Epilepsy  
Stroke  
Intellectual disability  
Headache  
Bipolar disorder  
Sleep disorders  
Polyneuropathy  
Multiple sclerosis  
Cerebral palsy  
Dementia  
Brain tumours  
Eating disorders  
Neuromuscular disorders  
Infections of the CNS  
Other neurodegenerative disorders  
Parkinson's disease

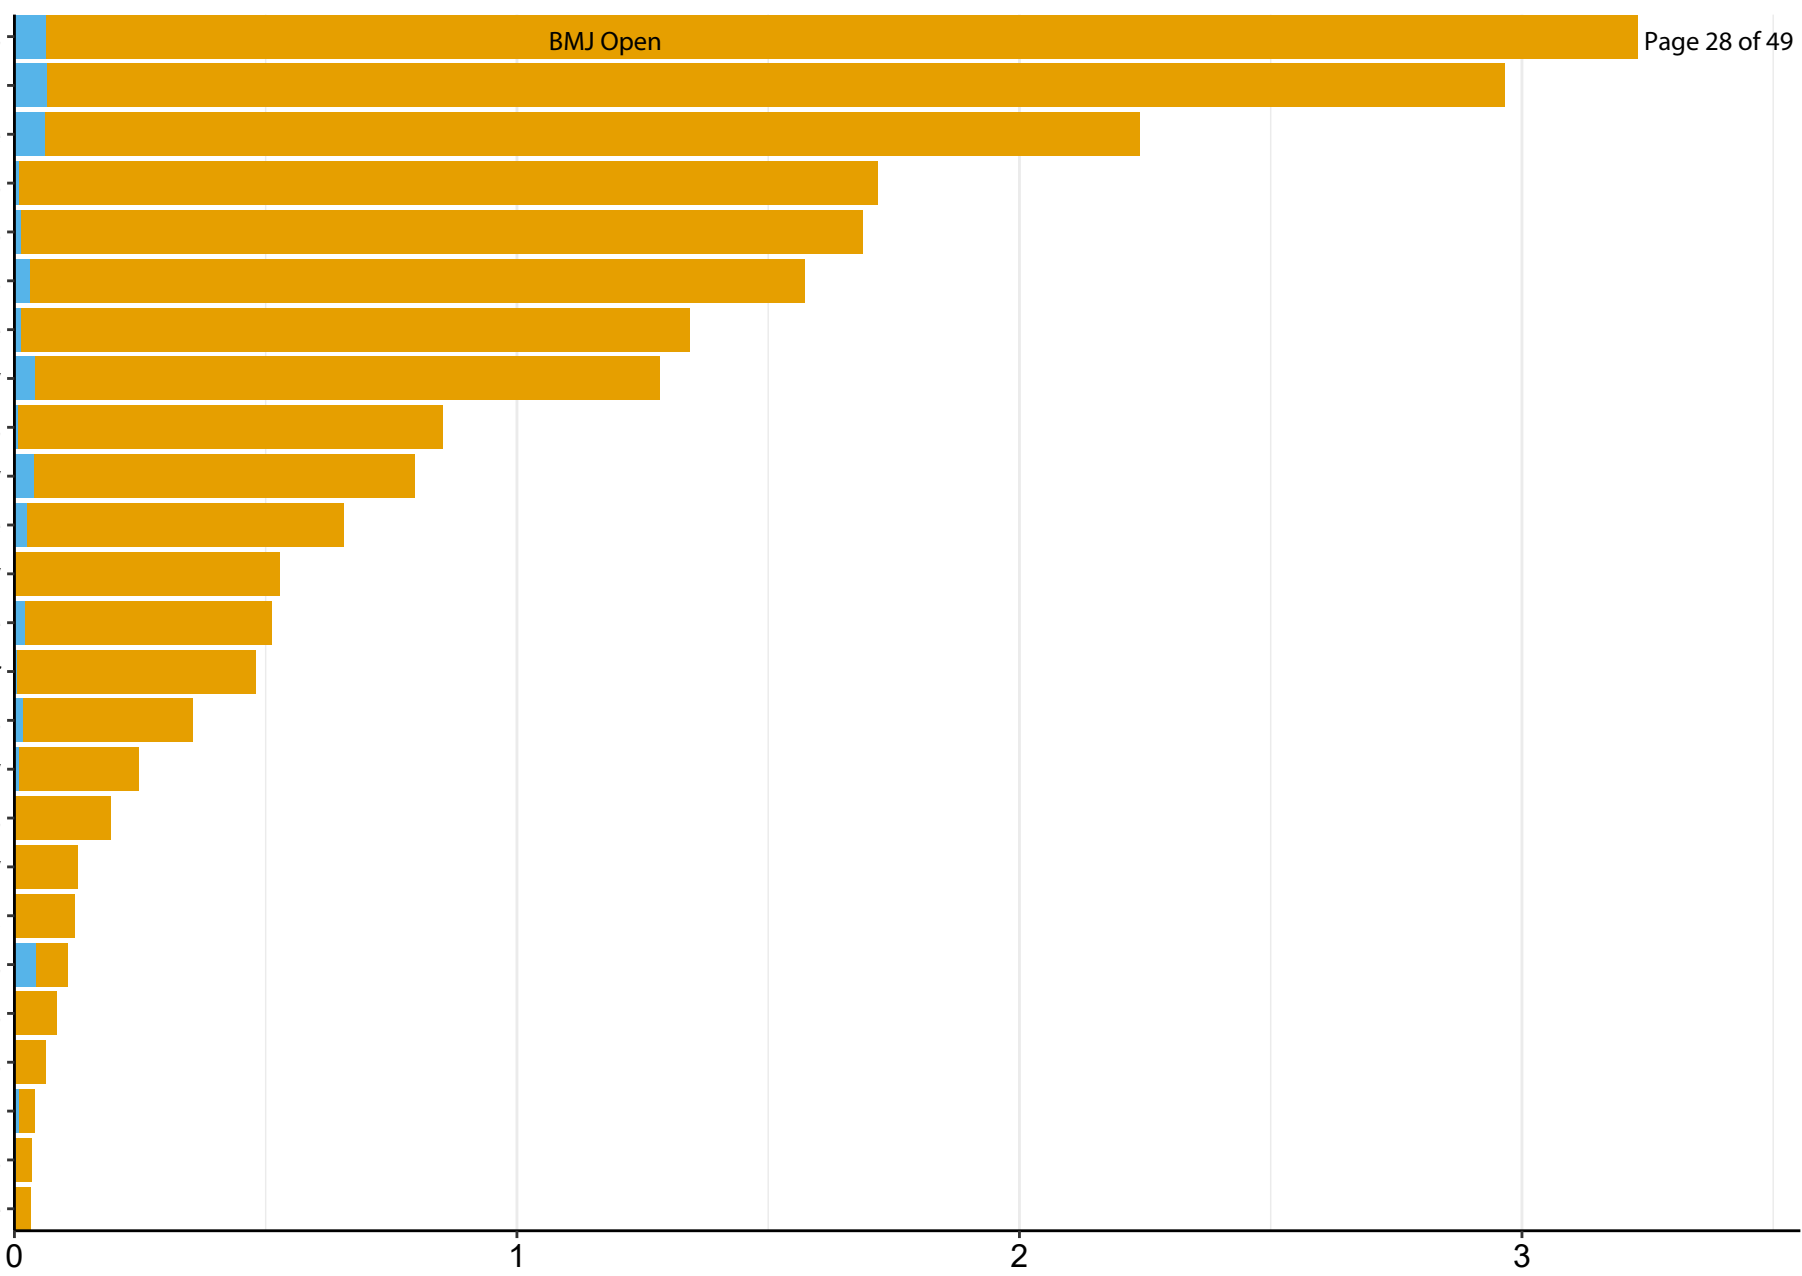

Lost productivity in billion EUR

Legend:  
■ Lost productivity due to premature death  
■ Lost productivity associated with illness



## APPENDIX 1 – DATA SOURCES

From the Danish Civil Registration System (DCRS), we obtained personal identification numbers (*i.e.*, CPR-numbers, a unique 10-digit number for every Danish citizen given at birth or immigration) to identify individuals across the nationwide registries in both the healthcare and socioeconomic systems. Also, the DCRS holds information on date of birth, sex, vital status, and place of living, of every person in Denmark.<sup>1</sup>

The Danish National Patient Registry (DNPR) holds information on all in- and outpatient hospital contacts since 1995, with details about date of admission and discharge, procedures and operations, and one or more discharge diagnoses.<sup>2</sup> Similarly, all contacts to psychiatric hospitals are recorded in the Danish Psychiatric Central Research Registry, which since 1995 has been included in the DNPR. The discharge diagnoses are recorded using the International Classification of Diseases, Tenth Revision (ICD-10).<sup>3</sup> For every hospital contact, the accumulated costs of the services provided are reimbursed to the hospital department using national reimbursement rates/tariffs based on average costs of the services. Diagnosis-related group (DRG) tariffs are used for inpatient contacts and Danish Ambulatory Grouping System (DAGS) tariffs for outpatient contacts.<sup>4</sup>

The Danish Health Service Registry (DHSR) contains information on services provided by health contractors in primary health care covered by the national health services during consultations, telephone consultations, and home visits. Services are recorded from a wide range of health contractors such as general practitioners, dentists, physiotherapists, chiropodists, chiropractors, psychologists, and other specialists. Every service recorded in the DHSR is accompanied with a corresponding tariff used when the counties reimburse services to the health contractor.<sup>5</sup>

The Danish National Prescription Registry includes nationwide data on all prescriptions filled at outpatient pharmacies since 1995, *e.g.*, drug type, number of packages, package size, and price. Since 2004, indication of prescriptions are recorded, but with missing indication in one third of prescriptions filled. Drug types are classified according to the Anatomical Therapeutic Chemical (ATC) classification system.<sup>6</sup>

1  
2  
3  
4 Finally, Statistics Denmark hosts registries with information on every Danish resident on whether the  
5  
6 person lives in an elderly home or nursery home, on exact time spent by public home help in private  
7  
8 households (in hours), and on personal income before taxes.<sup>7</sup> Data on rehabilitation provided by  
9  
10 municipalities were not available in any nationwide registry and therefore not included in our analyses.  
11  
12  
13  
14  
15  
16  
17  
18  
19  
20  
21  
22  
23  
24  
25  
26  
27  
28  
29  
30  
31  
32  
33  
34  
35  
36  
37  
38  
39  
40  
41  
42  
43  
44  
45  
46  
47  
48  
49  
50  
51  
52  
53  
54  
55  
56  
57  
58  
59  
60

For peer review only

## APPENDIX 2 – CODE BOOKS

### ICD-10 and ATC codes

In the main analyses, brain disorders were defined by the “Included diagnosis codes” excluding the codes in “Excluded diagnosis codes”. In the sensitivity analyses, brain disorders were defined by either “Included diagnosis codes” excluding the codes in “Excluded diagnosis codes” or by filled prescriptions including “Included ATC codes”. For The Anatomical Therapeutic Chemical (ATC) codes, if any indication codes are given, only prescriptions with those ATC and indication codes were used. Diagnosis codes are given as International Classification of Diseases, Tenth Revision (ICD-10) codes. For both ICD-10 and ATC codes, all subcodes were included.

| Brain disorder                           | Included diagnosis codes                                                                                   | Excluded diagnosis codes | Included ATC codes               | Included indication codes |
|------------------------------------------|------------------------------------------------------------------------------------------------------------|--------------------------|----------------------------------|---------------------------|
| Any brain disorder                       |                                                                                                            |                          |                                  |                           |
| Alcohol abuse                            | F10 E244 G312 G621 G721 I426 K292 K70 K852 K860 Q860                                                       | F100                     | V03AA<br>N07BB                   |                           |
| Anxiety disorders                        | F40 F41 F42                                                                                                |                          | N06A                             | 371 830 163               |
| Bipolar disorder                         | F30 F31                                                                                                    |                          | N05AN01                          |                           |
| Brain tumours                            | C70 C71 C72 D32 D33 D42 D43                                                                                |                          |                                  |                           |
| Cerebral palsy                           | G80                                                                                                        |                          |                                  |                           |
| Dementia                                 | F00 F01 F02 F03 G30 G310B G311 G318 G319                                                                   |                          | N06D                             | 330 331 329 838           |
| Depression                               | F32 F33                                                                                                    |                          | N06A                             | 168 270                   |
| Developmental and behavioural disorders  | F84 F9                                                                                                     | F99                      |                                  |                           |
| Drug abuse                               | F1                                                                                                         | F10 F17                  | N07BC01<br>N07BC51               |                           |
| Eating disorders                         | F500 F501 F502 F503                                                                                        |                          |                                  |                           |
| Epilepsy                                 | G40                                                                                                        |                          |                                  |                           |
| Headache                                 | G43 G44                                                                                                    |                          | N02C                             | 56 269 153                |
| Infections of the central nervous system | G0 A17 A321 A327 A390 A521 A522 A523 A692 A83 A84 A85 A87 A89 B003 B004 B010 B011 B020 B021 B582 B451 B375 | G08 G09                  |                                  |                           |
| Intellectual disability                  | F7 Q90 Q992                                                                                                |                          |                                  |                           |
| Multiple sclerosis                       | G35                                                                                                        |                          |                                  |                           |
| Neuromuscular disorders                  | G70 G71 G72 G73                                                                                            |                          |                                  |                           |
| Other neurodegenerative disorders        | G10 G11 G122G G13 G14                                                                                      | G130 G139                |                                  |                           |
| Parkinson’s disease                      | G20 G23                                                                                                    |                          | N04BA<br>N04BB<br>N04BD<br>N04BX |                           |
| Personality disorders                    | F60                                                                                                        |                          |                                  |                           |
| Polyneuropathy                           | G60 G61 G62 G63 G64 G130                                                                                   |                          |                                  |                           |
| Schizophrenia spectrum disorders         | F2                                                                                                         |                          |                                  |                           |
| Sleep disorders                          | F51 G470 G471 G473 G474                                                                                    |                          | N05CF01<br>N05CH01               | 372 165 166 373<br>170    |
| Stress-related disorders                 | F43                                                                                                        |                          |                                  |                           |
| Stroke                                   | I60 I61 I63 I64                                                                                            | I608                     |                                  |                           |
| Traumatic brain injury                   | S020 S021 S027 S029 S06                                                                                    |                          |                                  |                           |

## Charlson Comorbidity Index (CCI)

The codes included were used to identify comorbidity in persons with brain disorders and their comparisons. Persons were considered having the specific type of comorbidity when having at least one of the listed discharge diagnosis codes (including all subcodes) recorded in the Danish National Patient Registry up to 10 years before index date.

| CCI disease                       | Included ICD-8 and ICD-10 diagnosis codes                                                                                                                       |
|-----------------------------------|-----------------------------------------------------------------------------------------------------------------------------------------------------------------|
| Myocardial infarction             | 410 DI21 DI22 DI23                                                                                                                                              |
| Congestive heart failure          | 42709 42710 42711 42719 42899 78249 DI50 DI110 DI130 DI132                                                                                                      |
| Peripheral vascular disease       | 440 441 442 443 444 445 DI70 DI71 DI72 DI73 DI74 DI77                                                                                                           |
| Cerebrovascular disease           | 430 431 432 433 434 435 436 437 438 DI6 DG45 DG46                                                                                                               |
| Dementia                          | 29009 2901 29309 DF00 DF01 DF02 DF03 DF051 DG30                                                                                                                 |
| Chronic pulmonary disease         | 490 491 492 493 515 516 517 518 DJ40 DJ41 DJ42 DJ43 DJ44 DJ45 DJ46 DJ47 DJ60 DJ61 DJ62 DJ63 DJ64 DJ65 DJ66 DJ67 DJ684 DJ701 DJ703 DJ841 DJ920 DJ961 DJ982 DJ983 |
| Connective tissue disease         | 712 716 734 446 13599 DM05 DM06 DM08 DM09 DM30 DM31 DM32 DM33 DM34 DM35 DM36 DD86                                                                               |
| Ulcer disease                     | 53091 53098 531 532 533 534 DK221 DK25 DK26 DK27 DK28                                                                                                           |
| Mild liver disease                | 571 57301 57304 DB18 DK700 DK701 DK702 DK703 DK709 DK71 DK73 DK74 DK760                                                                                         |
| Diabetes without end-organ damage | 24900 24906 24907 24909 25000 25006 25007 25009 DE100 DE101 DE109 DE110 DE111 DE119                                                                             |
| Hemiplegia                        | 344 DG81 DG82                                                                                                                                                   |
| Moderate to severe renal disease  | 403 404 580 581 582 583 584 59009 59319 7531 792 DI12 DI13 DN00 DN01 DN02 DN03 DN04 DN05 DN07 DN11 DN14 DN17 DN18 DN19 DQ61                                     |
| Diabetes with end-organ damage    | 24901 24902 24903 24904 24905 24908 25001 25002 25003 25004 25005 25008 DE102 DE103 DE104 DE105 DE106 DE107 DE108 DE112 DE113 DE114 DE115 DE116 DE117 DE118     |
| Solid cancer tumour               | 14 15 16 17 18 190 191 192 193 194 DC0 DC1 DC2 DC3 DC4 DC5 DC6 DC70 DC71 DC72 DC73 DC74 DC75                                                                    |
| Leukaemia                         | 204 205 206 207 DC91 DC92 DC93 DC94 DC95                                                                                                                        |
| Lymphoma                          | 200 201 202 203 27559 DC81 DC82 DC83 DC84 DC85 DC88 DC90 DC96                                                                                                   |
| Moderate to severe liver disease  | 07000 07002 07004 07006 07008 57300 4560 DB150 DB160 DB162 DB190 DK704 DK72 DK766 DI85                                                                          |
| Metastatic solid tumour           | 195 196 197 198 199 DC76 DC77 DC78 DC79 DC80                                                                                                                    |
| AIDS                              | 07983 DB21 DB22 DB23 DB24                                                                                                                                       |

## Supplementary tables

Suppl. Table 1. Characteristics of patients with prevalent disorders in Denmark in 2015 sorted in alphabetical order.

| Disease group                            | Prevalent cohorts: 2015 |                |                     |                |                 |                |
|------------------------------------------|-------------------------|----------------|---------------------|----------------|-----------------|----------------|
|                                          | Persons, N              | Men, N (%)     | Age, median (Q1-Q3) | CCI: 0, N (%)  | CCI: 1-2, N (%) | CCI: +3, N (%) |
| Any brain disorder                       | 1,075,081               | 536,462 (49.9) | 46.0 (27.5-63.6)    | 788,948 (73.4) | 222,453 (20.7)  | 63,680 (5.9)   |
| Alcohol abuse                            | 101,066                 | 67,376 (66.7)  | 56.5 (46.2-65.8)    | 59,961 (59.3)  | 28,397 (28.1)   | 12,708 (12.6)  |
| Anxiety disorders                        | 96,943                  | 33,768 (34.8)  | 41.2 (28.8-54.3)    | 78,009 (80.5)  | 15,181 (15.7)   | 3,753 (3.9)    |
| Bipolar disorder                         | 23,364                  | 9,366 (40.1)   | 52.4 (39.3-64.9)    | 17,127 (73.3)  | 4,851 (20.8)    | 1,386 (5.9)    |
| Brain tumours                            | 14,953                  | 6,101 (40.8)   | 62.6 (48.6-71.9)    | 8,718 (58.3)   | 4,339 (29.0)    | 1,896 (12.7)   |
| Cerebral palsy                           | 9,083                   | 5,093 (56.1)   | 22.3 (14.1-37.0)    | 6,516 (71.7)   | 2,092 (23.0)    | 475 (5.2)      |
| Dementia                                 | 40,037                  | 15,645 (39.1)  | 81.7 (73.9-87.5)    | 8,340 (20.8)   | 22,655 (56.6)   | 9,042 (22.6)   |
| Depression                               | 180,886                 | 64,191 (35.5)  | 49.0 (35.6-64.1)    | 130,862 (72.3) | 38,342 (21.2)   | 11,682 (6.5)   |
| Developmental and behavioural disorders  | 103,157                 | 68,589 (66.5)  | 19.6 (14.2-26.0)    | 94,745 (91.8)  | 7,841 (7.6)     | 571 (0.6)      |
| Drug abuse                               | 50,066                  | 32,295 (64.5)  | 38.6 (28.4-50.8)    | 38,657 (77.2)  | 9,180 (18.3)    | 2,229 (4.5)    |
| Eating disorders                         | 15,936                  | 750 (4.7)      | 29.5 (23.0-36.9)    | 14,484 (90.9)  | 1,332 (8.4)     | 120 (0.8)      |
| Epilepsy                                 | 72,205                  | 37,047 (51.3)  | 43.5 (24.8-62.1)    | 51,701 (71.6)  | 15,562 (21.6)   | 4,942 (6.8)    |
| Headache                                 | 96,252                  | 32,218 (33.5)  | 45.4 (31.2-57.6)    | 75,439 (78.4)  | 17,566 (18.3)   | 3,247 (3.4)    |
| Infections of the central nervous system | 26,829                  | 14,069 (52.4)  | 43.1 (22.9-61.5)    | 20,740 (77.3)  | 4,709 (17.6)    | 1,380 (5.1)    |
| Intellectual disability                  | 27,605                  | 16,087 (58.3)  | 25.4 (17.1-45.1)    | 23,577 (85.4)  | 3,501 (12.7)    | 527 (1.9)      |
| Multiple sclerosis                       | 14,264                  | 4,431 (31.1)   | 52.6 (42.9-62.7)    | 11,206 (78.6)  | 2,559 (17.9)    | 499 (3.5)      |
| Neuromuscular disorders                  | 7,080                   | 3,649 (51.5)   | 51.4 (33.3-66.5)    | 4,427 (62.5)   | 1,992 (28.1)    | 661 (9.3)      |
| Other neurodegenerative disorders        | 2,192                   | 1,143 (52.1)   | 59.9 (46.2-70.5)    | 1,381 (63.0)   | 622 (28.4)      | 189 (8.6)      |
| Parkinson's disease                      | 8,942                   | 5,083 (56.8)   | 75.3 (68.4-81.4)    | 4,430 (49.5)   | 3,323 (37.2)    | 1,189 (13.3)   |
| Personality disorders                    | 71,334                  | 24,517 (34.4)  | 39.9 (30.6-51.0)    | 58,516 (82.0)  | 10,824 (15.2)   | 1,994 (2.8)    |
| Polyneuropathy                           | 32,710                  | 18,918 (57.8)  | 66.7 (55.0-75.8)    | 15,900 (48.6)  | 11,139 (34.1)   | 5,671 (17.3)   |
| Schizophrenia spectrum disorders         | 61,346                  | 32,637 (53.2)  | 45.1 (32.1-57.7)    | 48,640 (79.3)  | 10,276 (16.8)   | 2,430 (4.0)    |
| Sleep disorders                          | 61,666                  | 45,042 (73.0)  | 55.9 (43.0-66.2)    | 41,909 (68.0)  | 15,223 (24.7)   | 4,534 (7.4)    |
| Stress-related disorders                 | 196,291                 | 77,494 (39.5)  | 42.3 (29.3-54.1)    | 158,789 (80.9) | 31,138 (15.9)   | 6,364 (3.2)    |
| Stroke                                   | 120,065                 | 64,067 (53.4)  | 71.0 (61.1-79.9)    | 23,651 (19.7)  | 70,389 (58.6)   | 26,025 (21.7)  |
| Traumatic brain injury                   | 249,348                 | 142,776 (57.3) | 34.9 (22.1-53.4)    | 207,314 (83.1) | 34,162 (13.7)   | 7,872 (3.2)    |

Abbreviations: Q, quartile; CCI, Charlson Comorbidity Index.

**Suppl. Table 2. Characteristics of patients with incident brain disorders in Denmark during 2011-2015 sorted in alphabetical order.**

| Disease group                            | Incident cohorts: 2011-2015 |                |                     |                |                 |                |
|------------------------------------------|-----------------------------|----------------|---------------------|----------------|-----------------|----------------|
|                                          | Persons, N                  | Men, N (%)     | Age, median (Q1-Q3) | CCI: 0, N (%)  | CCI: 1-2, N (%) | CCI: +3, N (%) |
| Any brain disorder                       | 381,759                     | 187,780 (49.2) | 46.6 (21.5-68.9)    | 295,560 (77.4) | 64,746 (17.0)   | 21,453 (5.6)   |
| Alcohol abuse                            | 37,032                      | 25,251 (68.2)  | 55.8 (42.7-66.8)    | 25,797 (69.7)  | 8,347 (22.5)    | 2,888 (7.8)    |
| Anxiety disorders                        | 53,350                      | 20,013 (37.5)  | 35.8 (22.3-56.5)    | 39,034 (73.2)  | 8,480 (15.9)    | 5,836 (10.9)   |
| Bipolar disorder                         | 9,838                       | 4,074 (41.4)   | 40.8 (28.5-55.0)    | 7,951 (80.8)   | 1,500 (15.2)    | 387 (3.9)      |
| Brain tumours                            | 9,336                       | 4,199 (45.0)   | 64.1 (50.7-72.9)    | 6,044 (64.7)   | 2,227 (23.9)    | 1,065 (11.4)   |
| Cerebral palsy                           | 2,145                       | 1,199 (55.9)   | 13.7 (3.1-54.3)     | 1,371 (63.9)   | 582 (27.1)      | 192 (9.0)      |
| Dementia                                 | 42,798                      | 17,454 (40.8)  | 81.8 (75.4-87.0)    | 21,015 (49.1)  | 15,686 (36.7)   | 6,097 (14.2)   |
| Depression                               | 78,926                      | 29,379 (37.2)  | 45.4 (27.9-66.8)    | 56,768 (71.9)  | 15,445 (19.6)   | 6,713 (8.5)    |
| Developmental and behavioural disorders  | 48,562                      | 29,864 (61.5)  | 14.1 (8.6-21.9)     | 43,747 (90.1)  | 4,445 (9.2)     | 370 (0.8)      |
| Drug abuse                               | 18,843                      | 12,469 (66.2)  | 26.9 (20.7-42.3)    | 15,944 (84.6)  | 2,322 (12.3)    | 577 (3.1)      |
| Eating disorders                         | 6,011                       | 321 (5.3)      | 19.7 (16.0-24.9)    | 5,683 (94.5)   | 307 (5.1)       | 21 (0.3)       |
| Epilepsy                                 | 21,255                      | 11,301 (53.2)  | 53.2 (21.1-70.6)    | 12,057 (56.7)  | 6,319 (29.7)    | 2,879 (13.5)   |
| Headache                                 | 35,180                      | 11,547 (32.8)  | 37.6 (23.4-50.4)    | 29,066 (82.6)  | 5,292 (15.0)    | 822 (2.3)      |
| Infections of the central nervous system | 9,501                       | 4,922 (51.8)   | 44.6 (21.9-64.2)    | 7,086 (74.6)   | 1,727 (18.2)    | 688 (7.2)      |
| Intellectual disability                  | 8,166                       | 4,692 (57.5)   | 17.3 (9.9-34.8)     | 7,035 (86.1)   | 994 (12.2)      | 137 (1.7)      |
| Multiple sclerosis                       | 3,345                       | 1,070 (32.0)   | 41.7 (31.9-52.0)    | 2,833 (84.7)   | 449 (13.4)      | 63 (1.9)       |
| Neuromuscular disorders                  | 3,062                       | 1,596 (52.1)   | 52.8 (32.9-67.8)    | 1,950 (63.7)   | 803 (26.2)      | 309 (10.1)     |
| Other neurodegenerative disorders        | 1,464                       | 777 (53.1)     | 65.3 (53.1-73.2)    | 904 (61.7)     | 425 (29.0)      | 135 (9.2)      |
| Parkinson's disease                      | 6,478                       | 3,883 (59.9)   | 75.5 (68.9-81.4)    | 3,459 (53.4)   | 2,236 (34.5)    | 783 (12.1)     |
| Personality disorders                    | 21,556                      | 6,762 (31.4)   | 27.2 (21.3-38.6)    | 19,265 (89.4)  | 2,030 (9.4)     | 261 (1.2)      |
| Polyneuropathy                           | 17,925                      | 10,755 (60.0)  | 65.9 (54.5-75.0)    | 8,825 (49.2)   | 6,108 (34.1)    | 2,992 (16.7)   |
| Schizophrenia spectrum disorders         | 19,316                      | 10,219 (52.9)  | 29.7 (21.1-48.9)    | 16,209 (83.9)  | 2,483 (12.9)    | 624 (3.2)      |
| Sleep disorders                          | 31,316                      | 21,769 (69.5)  | 51.9 (38.5-62.7)    | 21,974 (70.2)  | 7,086 (22.6)    | 2,256 (7.2)    |
| Stress-related disorders                 | 80,953                      | 34,110 (42.1)  | 34.5 (20.5-48.5)    | 68,431 (84.5)  | 10,356 (12.8)   | 2,166 (2.7)    |
| Stroke                                   | 67,539                      | 35,308 (52.3)  | 71.8 (61.1-81.3)    | 37,862 (56.1)  | 21,220 (31.4)   | 8,457 (12.5)   |
| Traumatic brain injury                   | 64,931                      | 35,456 (54.6)  | 34.3 (15.7-63.4)    | 50,924 (78.4)  | 10,610 (16.3)   | 3,397 (5.2)    |

Abbreviations: Q, quartile; CCI, Charlson Comorbidity Index.

**Suppl. Table 3. Occurrence of hospital-diagnosed brain disorders in the Danish population including incidence during 2011-2015 and prevalence in 2015 sorted in alphabetical order.**

| Disease group                            | Prevalent cohorts: 2015 |                                         | Incident cohorts: 2011-2015 |                                                  |
|------------------------------------------|-------------------------|-----------------------------------------|-----------------------------|--------------------------------------------------|
|                                          | Prevalence, N (%)       | Prevalence per 100,000 persons (95% CI) | Incidence, N                | Incidence rate per 100,000 person-years (95% CI) |
| Any brain disorder                       | 1,075,081 (18.9)        | 18,879 (18,844-18,915)                  | 381,759                     | 1,349 (1,345-1,353)                              |
| Alcohol abuse                            | 101,066 (1.8)           | 1,775 (1,764-1,786)                     | 37,032                      | 131 (130-132)                                    |
| Anxiety disorders                        | 96,943 (1.7)            | 1,702 (1,692-1,713)                     | 53,350                      | 189 (187-190)                                    |
| Bipolar disorder                         | 23,364 (0.4)            | 410 (405-416)                           | 9,838                       | 35 (34-35)                                       |
| Brain tumours                            | 14,953 (0.3)            | 263 (258-267)                           | 9,336                       | 33 (32-34)                                       |
| Cerebral palsy                           | 9,083 (0.2)             | 160 (156-163)                           | 2,145                       | 8 (7-8)                                          |
| Dementia                                 | 40,037 (0.7)            | 703 (696-710)                           | 42,798                      | 151 (150-153)                                    |
| Depression                               | 180,886 (3.2)           | 3,176 (3,162-3,191)                     | 78,926                      | 279 (277-281)                                    |
| Developmental and behavioural disorders  | 103,157 (1.8)           | 1,812 (1,800-1,823)                     | 48,562                      | 172 (170-173)                                    |
| Drug abuse                               | 50,066 (0.9)            | 879 (872-887)                           | 18,843                      | 67 (66-68)                                       |
| Eating disorders                         | 15,936 (0.3)            | 280 (276-284)                           | 6,011                       | 21 (21-22)                                       |
| Epilepsy                                 | 72,205 (1.3)            | 1,268 (1,259-1,277)                     | 21,255                      | 75 (74-76)                                       |
| Headache                                 | 96,252 (1.7)            | 1,690 (1,680-1,701)                     | 35,180                      | 124 (123-126)                                    |
| Infections of the central nervous system | 26,829 (0.5)            | 471 (466-477)                           | 9,501                       | 34 (33-34)                                       |
| Intellectual disability                  | 27,605 (0.5)            | 485 (479-491)                           | 8,166                       | 29 (28-29)                                       |
| Multiple sclerosis                       | 14,264 (0.3)            | 250 (246-255)                           | 3,345                       | 12 (11-12)                                       |
| Neuromuscular disorders                  | 7,080 (0.1)             | 124 (121-127)                           | 3,062                       | 11 (10-11)                                       |
| Other neurodegenerative disorders        | 2,192 (0.0)             | 38 (37-40)                              | 1,464                       | 5 (5-5)                                          |
| Parkinson's disease                      | 8,942 (0.2)             | 157 (154-160)                           | 6,478                       | 23 (22-23)                                       |
| Personality disorders                    | 71,334 (1.3)            | 1,253 (1,244-1,262)                     | 21,556                      | 76 (75-77)                                       |
| Polyneuropathy                           | 32,710 (0.6)            | 574 (568-581)                           | 17,925                      | 63 (62-64)                                       |
| Schizophrenia spectrum disorders         | 61,346 (1.1)            | 1,077 (1,069-1,086)                     | 19,316                      | 68 (67-69)                                       |
| Sleep disorders                          | 61,666 (1.1)            | 1,083 (1,074-1,091)                     | 31,316                      | 111 (109-112)                                    |
| Stress-related disorders                 | 196,291 (3.4)           | 3,447 (3,432-3,462)                     | 80,953                      | 286 (284-288)                                    |
| Stroke                                   | 120,065 (2.1)           | 2,108 (2,097-2,120)                     | 67,539                      | 239 (237-240)                                    |
| Traumatic brain injury                   | 249,348 (4.4)           | 4,379 (4,362-4,396)                     | 64,931                      | 229 (228-231)                                    |

Abbreviations: CI, confidence interval.

**Suppl. Table 4. Actual and attributable costs in total and per person in persons with prevalent brain disorders in 2015, and incident brain disorders during 2011-2015 sorted in alphabetical order and stratified by cost components.**

| Brain disorder     | Cost component                         | Prevalent cohort - 2015    |                                       |                                  |                                             | Incident cohort - 2011-2015                                           |
|--------------------|----------------------------------------|----------------------------|---------------------------------------|----------------------------------|---------------------------------------------|-----------------------------------------------------------------------|
|                    |                                        | Actual costs in 2015 (EUR) | Actual costs per person in 2015 (EUR) | Attributable costs in 2015 (EUR) | Attributable costs per person in 2015 (EUR) | Attributable costs per person in the first year after diagnosis (EUR) |
| Any brain disorder | Primary sector                         | 488,168,143                | 460                                   | 191,774,339                      | 181                                         | 175                                                                   |
|                    | Secondary sector - Outpatient          | 1,491,081,458              | 1,406                                 | 743,338,257                      | 701                                         | 2,702                                                                 |
|                    | Secondary sector - Inpatient           | 2,522,910,114              | 2,379                                 | 1,638,312,025                    | 1,545                                       | 8,457                                                                 |
|                    | Filled prescriptions                   | 533,852,195                | 503                                   | 319,922,005                      | 302                                         | 211                                                                   |
|                    | Home care                              | 700,068,647                | 660                                   | 529,492,180                      | 499                                         | 489                                                                   |
|                    | Nursing home / sheltered accommodation | 2,138,655,226              | 2,017                                 | 1,786,588,544                    | 1,685                                       | 749                                                                   |
|                    | Total cost (excl. lost productivity)   | 7,874,735,782              | 7,426                                 | 5,209,427,352                    | 4,912                                       | 12,783                                                                |
| Alcohol abuse      | Primary sector                         | 43,832,697                 | 444                                   | 10,708,496                       | 109                                         | 164                                                                   |
|                    | Secondary sector - Outpatient          | 182,619,411                | 1,851                                 | 90,265,391                       | 915                                         | 2,318                                                                 |
|                    | Secondary sector - Inpatient           | 509,785,016                | 5,166                                 | 396,078,314                      | 4,014                                       | 14,252                                                                |
|                    | Filled prescriptions                   | 70,574,116                 | 715                                   | 41,364,956                       | 419                                         | 329                                                                   |
|                    | Home care                              | 86,902,799                 | 881                                   | 69,319,977                       | 703                                         | 686                                                                   |
|                    | Nursing home / sheltered accommodation | 272,375,227                | 2,760                                 | 235,944,141                      | 2,391                                       | 1,019                                                                 |
|                    | Total cost (excl. lost productivity)   | 1,166,089,265              | 11,817                                | 843,681,275                      | 8,550                                       | 18,768                                                                |
| Anxiety disorders  | Primary sector                         | 46,880,525                 | 488                                   | 17,760,012                       | 185                                         | 270                                                                   |
|                    | Secondary sector - Outpatient          | 186,143,973                | 1,939                                 | 112,251,855                      | 1,169                                       | 4,937                                                                 |
|                    | Secondary sector - Inpatient           | 304,572,473                | 3,172                                 | 220,690,805                      | 2,298                                       | 8,872                                                                 |
|                    | Filled prescriptions                   | 58,721,973                 | 612                                   | 38,187,658                       | 398                                         | 502                                                                   |
|                    | Home care                              | 32,889,132                 | 343                                   | 20,728,003                       | 216                                         | 359                                                                   |
|                    | Nursing home / sheltered accommodation | 93,491,816                 | 974                                   | 63,280,196                       | 659                                         | 368                                                                   |
|                    | Total cost (excl. lost productivity)   | 722,699,890                | 7,527                                 | 472,898,530                      | 4,925                                       | 15,308                                                                |
| Bipolar disorder   | Primary sector                         | 12,927,768                 | 561                                   | 4,802,917                        | 209                                         | 227                                                                   |
|                    | Secondary sector - Outpatient          | 68,871,491                 | 2,990                                 | 47,030,959                       | 2,042                                       | 6,368                                                                 |
|                    | Secondary sector - Inpatient           | 147,299,161                | 6,395                                 | 120,588,736                      | 5,235                                       | 17,468                                                                |
|                    | Filled prescriptions                   | 23,251,036                 | 1,009                                 | 16,487,361                       | 716                                         | 755                                                                   |
|                    | Home care                              | 17,966,005                 | 780                                   | 12,684,093                       | 551                                         | 299                                                                   |
|                    | Nursing home / sheltered accommodation | 65,937,773                 | 2,863                                 | 52,520,523                       | 2,280                                       | 680                                                                   |
|                    | Total cost (excl. lost productivity)   | 336,253,233                | 14,598                                | 254,114,589                      | 11,032                                      | 25,797                                                                |
| Brain tumours      | Primary sector                         | 9,283,859                  | 640                                   | 3,508,912                        | 242                                         | 223                                                                   |
|                    | Secondary sector - Outpatient          | 42,180,950                 | 2,910                                 | 26,480,502                       | 1,827                                       | 12,604                                                                |



|                                         |                                        | Prevalent cohort - 2015    |                                       |                                  |                                             | Incident cohort - 2011-2015                                           |
|-----------------------------------------|----------------------------------------|----------------------------|---------------------------------------|----------------------------------|---------------------------------------------|-----------------------------------------------------------------------|
| Brain disorder                          | Cost component                         | Actual costs in 2015 (EUR) | Actual costs per person in 2015 (EUR) | Attributable costs in 2015 (EUR) | Attributable costs per person in 2015 (EUR) | Attributable costs per person in the first year after diagnosis (EUR) |
|                                         | Secondary sector - Inpatient           | 57,321,123                 | 3,954                                 | 36,118,409                       | 2,492                                       | 29,223                                                                |
|                                         | Filled prescriptions                   | 8,861,608                  | 611                                   | 3,527,159                        | 243                                         | 295                                                                   |
|                                         | Home care                              | 16,473,487                 | 1,136                                 | 10,430,046                       | 720                                         | 901                                                                   |
|                                         | Nursing home / sheltered accommodation | 31,261,211                 | 2,157                                 | 14,864,894                       | 1,025                                       | 302                                                                   |
|                                         | Total cost (excl. lost productivity)   | 165,382,238                | 11,409                                | 94,929,922                       | 6,549                                       | 43,548                                                                |
| Cerebral palsy                          | Primary sector                         | 13,167,622                 | 1,462                                 | 11,318,548                       | 1,256                                       | 960                                                                   |
|                                         | Secondary sector - Outpatient          | 11,430,545                 | 1,269                                 | 6,723,166                        | 746                                         | 2,731                                                                 |
|                                         | Secondary sector - Inpatient           | 27,487,812                 | 3,051                                 | 21,438,091                       | 2,380                                       | 11,838                                                                |
|                                         | Filled prescriptions                   | 6,630,687                  | 736                                   | 5,437,246                        | 604                                         | 567                                                                   |
|                                         | Home care                              | 13,763,599                 | 1,528                                 | 13,328,070                       | 1,479                                       | 2,111                                                                 |
|                                         | Nursing home / sheltered accommodation | 11,864,848                 | 1,317                                 | 10,870,651                       | 1,207                                       | 3,193                                                                 |
|                                         | Total cost (excl. lost productivity)   | 84,345,114                 | 9,363                                 | 69,115,771                       | 7,672                                       | 21,400                                                                |
| Dementia                                | Primary sector                         | 24,098,562                 | 667                                   | 4,596,178                        | 127                                         | 137                                                                   |
|                                         | Secondary sector - Outpatient          | 43,138,878                 | 1,193                                 | -5,214,136                       | -144                                        | 1,567                                                                 |
|                                         | Secondary sector - Inpatient           | 140,689,111                | 3,891                                 | 46,270,459                       | 1,280                                       | 6,237                                                                 |
|                                         | Filled prescriptions                   | 35,544,655                 | 983                                   | 14,366,512                       | 397                                         | 458                                                                   |
|                                         | Home care                              | 148,296,718                | 4,102                                 | 85,823,645                       | 2,374                                       | 3,175                                                                 |
|                                         | Nursing home / sheltered accommodation | 1,079,664,024              | 29,862                                | 933,749,795                      | 25,826                                      | 10,891                                                                |
|                                         | Total cost (excl. lost productivity)   | 1,471,431,949              | 40,698                                | 1,079,592,452                    | 29,860                                      | 22,465                                                                |
| Depression                              | Primary sector                         | 95,893,225                 | 539                                   | 34,953,943                       | 196                                         | 294                                                                   |
|                                         | Secondary sector - Outpatient          | 353,092,962                | 1,983                                 | 198,404,020                      | 1,115                                       | 4,415                                                                 |
|                                         | Secondary sector - Inpatient           | 632,094,332                | 3,551                                 | 437,349,885                      | 2,457                                       | 11,336                                                                |
|                                         | Filled prescriptions                   | 123,586,689                | 694                                   | 75,514,229                       | 424                                         | 447                                                                   |
|                                         | Home care                              | 147,797,688                | 830                                   | 94,735,383                       | 532                                         | 817                                                                   |
|                                         | Nursing home / sheltered accommodation | 510,771,406                | 2,869                                 | 367,705,421                      | 2,066                                       | 1,275                                                                 |
|                                         | Total cost (excl. lost productivity)   | 1,863,236,302              | 10,466                                | 1,208,662,881                    | 6,789                                       | 18,584                                                                |
| Developmental and behavioural disorders | Primary sector                         | 27,337,787                 | 266                                   | 10,369,345                       | 101                                         | 104                                                                   |
|                                         | Secondary sector - Outpatient          | 116,363,305                | 1,130                                 | 75,097,169                       | 729                                         | 3,890                                                                 |
|                                         | Secondary sector - Inpatient           | 236,746,401                | 2,299                                 | 190,215,735                      | 1,847                                       | 5,695                                                                 |
|                                         | Filled prescriptions                   | 53,648,059                 | 521                                   | 45,268,384                       | 440                                         | 477                                                                   |
|                                         | Home care                              | 5,642,767                  | 55                                    | 4,450,425                        | 43                                          | 28                                                                    |
|                                         | Nursing home / sheltered accommodation | 11,467,658                 | 111                                   | 8,904,950                        | 86                                          | 39                                                                    |

|                                          |                                        | Prevalent cohort - 2015    |                                       |                                  |                                             | Incident cohort - 2011-2015                                           |
|------------------------------------------|----------------------------------------|----------------------------|---------------------------------------|----------------------------------|---------------------------------------------|-----------------------------------------------------------------------|
| Brain disorder                           | Cost component                         | Actual costs in 2015 (EUR) | Actual costs per person in 2015 (EUR) | Attributable costs in 2015 (EUR) | Attributable costs per person in 2015 (EUR) | Attributable costs per person in the first year after diagnosis (EUR) |
|                                          | Total cost (excl. lost productivity)   | 451,205,976                | 4,382                                 | 334,306,007                      | 3,247                                       | 10,235                                                                |
| Drug abuse                               | Primary sector                         | 18,789,575                 | 379                                   | 6,103,985                        | 123                                         | 173                                                                   |
|                                          | Secondary sector - Outpatient          | 104,455,802                | 2,110                                 | 71,938,513                       | 1,453                                       | 3,539                                                                 |
|                                          | Secondary sector - Inpatient           | 294,331,957                | 5,944                                 | 257,849,075                      | 5,207                                       | 14,939                                                                |
|                                          | Filled prescriptions                   | 39,585,700                 | 799                                   | 30,697,450                       | 620                                         | 525                                                                   |
|                                          | Home care                              | 21,420,415                 | 433                                   | 17,004,322                       | 343                                         | 320                                                                   |
|                                          | Nursing home / sheltered accommodation | 55,090,031                 | 1,113                                 | 44,708,406                       | 903                                         | 324                                                                   |
|                                          | Total cost (excl. lost productivity)   | 533,673,480                | 10,778                                | 428,301,752                      | 8,650                                       | 19,820                                                                |
| Eating disorders                         | Primary sector                         | 6,954,226                  | 438                                   | 2,231,551                        | 141                                         | 112                                                                   |
|                                          | Secondary sector - Outpatient          | 41,617,887                 | 2,621                                 | 30,089,653                       | 1,895                                       | 8,660                                                                 |
|                                          | Secondary sector - Inpatient           | 78,974,413                 | 4,973                                 | 66,777,164                       | 4,205                                       | 21,099                                                                |
|                                          | Filled prescriptions                   | 5,121,915                  | 323                                   | 2,656,004                        | 167                                         | 108                                                                   |
|                                          | Home care                              | 1,027,908                  | 65                                    | 768,275                          | 48                                          | 40                                                                    |
|                                          | Nursing home / sheltered accommodation | 1,702,989                  | 107                                   | 1,282,483                        | 81                                          | 65                                                                    |
|                                          | Total cost (excl. lost productivity)   | 135,399,338                | 8,526                                 | 103,805,130                      | 6,536                                       | 30,084                                                                |
| Epilepsy                                 | Primary sector                         | 41,173,985                 | 580                                   | 19,904,667                       | 280                                         | 350                                                                   |
|                                          | Secondary sector - Outpatient          | 108,270,760                | 1,524                                 | 51,399,429                       | 723                                         | 3,615                                                                 |
|                                          | Secondary sector - Inpatient           | 236,872,420                | 3,334                                 | 162,384,494                      | 2,286                                       | 13,573                                                                |
|                                          | Filled prescriptions                   | 56,830,263                 | 800                                   | 39,757,000                       | 560                                         | 539                                                                   |
|                                          | Home care                              | 71,643,564                 | 1,008                                 | 57,009,489                       | 802                                         | 1,439                                                                 |
|                                          | Nursing home / sheltered accommodation | 186,490,441                | 2,625                                 | 148,199,767                      | 2,086                                       | 3,600                                                                 |
|                                          | Total cost (excl. lost productivity)   | 701,281,434                | 9,871                                 | 478,654,845                      | 6,737                                       | 23,117                                                                |
| Headache                                 | Primary sector                         | 45,555,311                 | 475                                   | 15,231,927                       | 159                                         | 213                                                                   |
|                                          | Secondary sector - Outpatient          | 133,513,223                | 1,393                                 | 53,710,708                       | 560                                         | 1,579                                                                 |
|                                          | Secondary sector - Inpatient           | 165,735,926                | 1,729                                 | 72,915,060                       | 761                                         | 2,660                                                                 |
|                                          | Filled prescriptions                   | 41,304,678                 | 431                                   | 18,445,725                       | 192                                         | 144                                                                   |
|                                          | Home care                              | 18,540,020                 | 193                                   | 5,347,719                        | 56                                          | 24                                                                    |
|                                          | Nursing home / sheltered accommodation | 38,547,780                 | 402                                   | 7,238,248                        | 76                                          | -2                                                                    |
|                                          | Total cost (excl. lost productivity)   | 443,196,937                | 4,625                                 | 172,889,385                      | 1,804                                       | 4,618                                                                 |
| Infections of the central nervous system | Primary sector                         | 11,203,340                 | 421                                   | 3,297,607                        | 124                                         | 168                                                                   |
|                                          | Secondary sector - Outpatient          | 33,558,808                 | 1,262                                 | 12,417,210                       | 467                                         | 2,276                                                                 |
|                                          | Secondary sector - Inpatient           | 53,806,027                 | 2,023                                 | 25,888,210                       | 974                                         | 19,530                                                                |
|                                          | Filled prescriptions                   | 9,714,465                  | 365                                   | 3,292,758                        | 124                                         | 181                                                                   |

|                                   |                                        | Prevalent cohort - 2015    |                                       |                                  |                                             | Incident cohort - 2011-2015                                           |
|-----------------------------------|----------------------------------------|----------------------------|---------------------------------------|----------------------------------|---------------------------------------------|-----------------------------------------------------------------------|
| Brain disorder                    | Cost component                         | Actual costs in 2015 (EUR) | Actual costs per person in 2015 (EUR) | Attributable costs in 2015 (EUR) | Attributable costs per person in 2015 (EUR) | Attributable costs per person in the first year after diagnosis (EUR) |
|                                   | Home care                              | 12,811,201                 | 482                                   | 7,584,973                        | 285                                         | 563                                                                   |
|                                   | Nursing home / sheltered accommodation | 27,418,463                 | 1,031                                 | 14,310,372                       | 538                                         | 461                                                                   |
|                                   | Total cost (excl. lost productivity)   | 148,512,305                | 5,585                                 | 66,791,130                       | 2,512                                       | 23,180                                                                |
| Intellectual disability           | Primary sector                         | 15,988,512                 | 583                                   | 9,893,121                        | 361                                         | 278                                                                   |
|                                   | Secondary sector - Outpatient          | 33,228,973                 | 1,213                                 | 17,182,705                       | 627                                         | 3,055                                                                 |
|                                   | Secondary sector - Inpatient           | 102,644,232                | 3,746                                 | 84,346,003                       | 3,078                                       | 9,397                                                                 |
|                                   | Filled prescriptions                   | 21,583,017                 | 788                                   | 17,432,722                       | 636                                         | 538                                                                   |
|                                   | Home care                              | 13,976,239                 | 510                                   | 12,449,542                       | 454                                         | 393                                                                   |
|                                   | Nursing home / sheltered accommodation | 32,339,423                 | 1,180                                 | 29,128,690                       | 1,063                                       | 598                                                                   |
|                                   | Total cost (excl. lost productivity)   | 219,760,396                | 8,020                                 | 170,432,783                      | 6,220                                       | 14,258                                                                |
| Multiple sclerosis                | Primary sector                         | 21,206,010                 | 1,503                                 | 16,200,681                       | 1,148                                       | 583                                                                   |
|                                   | Secondary sector - Outpatient          | 40,714,728                 | 2,885                                 | 27,233,358                       | 1,930                                       | 10,465                                                                |
|                                   | Secondary sector - Inpatient           | 43,448,943                 | 3,079                                 | 27,817,864                       | 1,971                                       | 4,925                                                                 |
|                                   | Filled prescriptions                   | 9,720,026                  | 689                                   | 5,629,372                        | 399                                         | 189                                                                   |
|                                   | Home care                              | 51,880,624                 | 3,676                                 | 49,746,582                       | 3,525                                       | 644                                                                   |
|                                   | Nursing home / sheltered accommodation | 31,328,567                 | 2,220                                 | 27,272,490                       | 1,933                                       | 335                                                                   |
|                                   | Total cost (excl. lost productivity)   | 198,298,897                | 14,051                                | 153,900,347                      | 10,905                                      | 17,140                                                                |
| Neuromuscular disorders           | Primary sector                         | 6,282,164                  | 901                                   | 3,972,937                        | 570                                         | 353                                                                   |
|                                   | Secondary sector - Outpatient          | 14,433,119                 | 2,071                                 | 8,172,495                        | 1,172                                       | 3,211                                                                 |
|                                   | Secondary sector - Inpatient           | 29,246,940                 | 4,196                                 | 20,898,189                       | 2,998                                       | 16,132                                                                |
|                                   | Filled prescriptions                   | 4,437,530                  | 637                                   | 2,451,542                        | 352                                         | 389                                                                   |
|                                   | Home care                              | 8,986,447                  | 1,289                                 | 7,194,501                        | 1,032                                       | 544                                                                   |
|                                   | Nursing home / sheltered accommodation | 8,955,012                  | 1,285                                 | 4,625,467                        | 664                                         | 147                                                                   |
|                                   | Total cost (excl. lost productivity)   | 72,341,211                 | 10,378                                | 47,315,130                       | 6,788                                       | 20,777                                                                |
| Other neurodegenerative disorders | Primary sector                         | 3,467,634                  | 1,660                                 | 2,695,799                        | 1,290                                       | 1,214                                                                 |
|                                   | Secondary sector - Outpatient          | 3,744,735                  | 1,792                                 | 1,557,828                        | 746                                         | 2,623                                                                 |
|                                   | Secondary sector - Inpatient           | 12,458,820                 | 5,963                                 | 9,519,636                        | 4,556                                       | 18,250                                                                |
|                                   | Filled prescriptions                   | 2,025,361                  | 969                                   | 1,312,465                        | 628                                         | 1,152                                                                 |
|                                   | Home care                              | 9,972,538                  | 4,773                                 | 9,295,614                        | 4,449                                       | 5,491                                                                 |
|                                   | Nursing home / sheltered accommodation | 15,620,797                 | 7,476                                 | 13,965,869                       | 6,684                                       | 3,904                                                                 |
|                                   | Total cost (excl. lost productivity)   | 47,289,884                 | 22,634                                | 38,347,211                       | 18,354                                      | 32,634                                                                |
| Parkinson's disease               | Primary sector                         | 14,860,564                 | 1,776                                 | 10,688,805                       | 1,278                                       | 910                                                                   |

|                                  |                                        | Prevalent cohort - 2015    |                                       |                                  |                                             | Incident cohort - 2011-2015                                           |
|----------------------------------|----------------------------------------|----------------------------|---------------------------------------|----------------------------------|---------------------------------------------|-----------------------------------------------------------------------|
| Brain disorder                   | Cost component                         | Actual costs in 2015 (EUR) | Actual costs per person in 2015 (EUR) | Attributable costs in 2015 (EUR) | Attributable costs per person in 2015 (EUR) | Attributable costs per person in the first year after diagnosis (EUR) |
|                                  | Secondary sector - Outpatient          | 17,312,390                 | 2,069                                 | 5,323,437                        | 636                                         | 2,069                                                                 |
|                                  | Secondary sector - Inpatient           | 46,402,317                 | 5,546                                 | 27,109,682                       | 3,240                                       | 8,711                                                                 |
|                                  | Filled prescriptions                   | 27,652,172                 | 3,305                                 | 23,257,252                       | 2,780                                       | 1,178                                                                 |
|                                  | Home care                              | 45,766,641                 | 5,470                                 | 38,139,915                       | 4,559                                       | 3,594                                                                 |
|                                  | Nursing home / sheltered accommodation | 118,302,501                | 14,140                                | 96,210,216                       | 11,499                                      | 5,067                                                                 |
|                                  | Total cost (excl. lost productivity)   | 270,296,586                | 32,307                                | 200,729,307                      | 23,992                                      | 21,530                                                                |
| Personality disorders            | Primary sector                         | 33,726,394                 | 475                                   | 12,370,687                       | 174                                         | 180                                                                   |
|                                  | Secondary sector - Outpatient          | 161,704,804                | 2,280                                 | 108,438,891                      | 1,529                                       | 5,307                                                                 |
|                                  | Secondary sector - Inpatient           | 294,012,210                | 4,145                                 | 237,084,594                      | 3,342                                       | 10,946                                                                |
|                                  | Filled prescriptions                   | 47,982,591                 | 676                                   | 33,993,717                       | 479                                         | 391                                                                   |
|                                  | Home care                              | 18,267,898                 | 258                                   | 13,204,541                       | 186                                         | 60                                                                    |
|                                  | Nursing home / sheltered accommodation | 50,162,995                 | 707                                   | 39,971,083                       | 563                                         | 175                                                                   |
|                                  | Total cost (excl. lost productivity)   | 605,856,892                | 8,541                                 | 445,063,513                      | 6,274                                       | 17,058                                                                |
| Polyneuropathy                   | Primary sector                         | 22,995,926                 | 721                                   | 9,555,562                        | 300                                         | 324                                                                   |
|                                  | Secondary sector - Outpatient          | 84,279,793                 | 2,643                                 | 47,316,582                       | 1,484                                       | 3,465                                                                 |
|                                  | Secondary sector - Inpatient           | 144,827,869                | 4,542                                 | 88,462,288                       | 2,775                                       | 8,416                                                                 |
|                                  | Filled prescriptions                   | 30,234,724                 | 948                                   | 16,995,029                       | 533                                         | 569                                                                   |
|                                  | Home care                              | 53,022,119                 | 1,663                                 | 35,217,614                       | 1,105                                       | 773                                                                   |
|                                  | Nursing home / sheltered accommodation | 92,592,235                 | 2,904                                 | 40,739,401                       | 1,278                                       | -89                                                                   |
|                                  | Total cost (excl. lost productivity)   | 427,952,666                | 13,423                                | 238,286,476                      | 7,474                                       | 13,458                                                                |
| Schizophrenia spectrum disorders | Primary sector                         | 25,870,906                 | 427                                   | 7,901,500                        | 130                                         | 130                                                                   |
|                                  | Secondary sector - Outpatient          | 184,183,351                | 3,039                                 | 138,302,570                      | 2,282                                       | 7,692                                                                 |
|                                  | Secondary sector - Inpatient           | 471,018,165                | 7,773                                 | 418,546,262                      | 6,907                                       | 28,598                                                                |
|                                  | Filled prescriptions                   | 60,736,022                 | 1,002                                 | 47,173,595                       | 778                                         | 584                                                                   |
|                                  | Home care                              | 40,669,756                 | 671                                   | 31,640,056                       | 522                                         | 328                                                                   |
|                                  | Nursing home / sheltered accommodation | 144,768,784                | 2,389                                 | 123,117,720                      | 2,032                                       | 1,259                                                                 |
|                                  | Total cost (excl. lost productivity)   | 927,246,985                | 15,302                                | 766,681,703                      | 12,652                                      | 38,591                                                                |
| Sleep disorders                  | Primary sector                         | 31,353,798                 | 512                                   | 11,799,623                       | 193                                         | 238                                                                   |
|                                  | Secondary sector - Outpatient          | 98,914,079                 | 1,616                                 | 41,921,108                       | 685                                         | 2,096                                                                 |
|                                  | Secondary sector - Inpatient           | 145,942,944                | 2,385                                 | 69,035,777                       | 1,128                                       | 3,396                                                                 |
|                                  | Filled prescriptions                   | 41,479,250                 | 678                                   | 23,820,309                       | 389                                         | 394                                                                   |
|                                  | Home care                              | 20,461,339                 | 334                                   | 9,184,546                        | 150                                         | 217                                                                   |

|                          |                                        | Prevalent cohort - 2015    |                                       |                                  |                                             | Incident cohort - 2011-2015                                           |
|--------------------------|----------------------------------------|----------------------------|---------------------------------------|----------------------------------|---------------------------------------------|-----------------------------------------------------------------------|
| Brain disorder           | Cost component                         | Actual costs in 2015 (EUR) | Actual costs per person in 2015 (EUR) | Attributable costs in 2015 (EUR) | Attributable costs per person in 2015 (EUR) | Attributable costs per person in the first year after diagnosis (EUR) |
|                          | Nursing home / sheltered accommodation | 31,784,606                 | 519                                   | 6,941,740                        | 113                                         | 45                                                                    |
|                          | Total cost (excl. lost productivity)   | 369,936,015                | 6,045                                 | 162,703,103                      | 2,659                                       | 6,386                                                                 |
| Stress-related disorders | Primary sector                         | 86,677,745                 | 444                                   | 29,534,278                       | 151                                         | 251                                                                   |
|                          | Secondary sector - Outpatient          | 334,672,975                | 1,716                                 | 190,005,389                      | 974                                         | 3,344                                                                 |
|                          | Secondary sector - Inpatient           | 594,516,328                | 3,048                                 | 435,161,116                      | 2,231                                       | 8,650                                                                 |
|                          | Filled prescriptions                   | 94,996,342                 | 487                                   | 55,121,881                       | 283                                         | 263                                                                   |
|                          | Home care                              | 52,036,361                 | 267                                   | 33,412,202                       | 171                                         | 132                                                                   |
|                          | Nursing home / sheltered accommodation | 136,104,200                | 698                                   | 94,380,524                       | 484                                         | 302                                                                   |
|                          | Total cost (excl. lost productivity)   | 1,299,003,951              | 6,660                                 | 837,615,391                      | 4,295                                       | 12,942                                                                |
| Stroke                   | Primary sector                         | 87,618,648                 | 759                                   | 36,193,449                       | 313                                         | 275                                                                   |
|                          | Secondary sector - Outpatient          | 200,887,719                | 1,740                                 | 56,107,195                       | 486                                         | 1,741                                                                 |
|                          | Secondary sector - Inpatient           | 462,612,656                | 4,006                                 | 236,363,400                      | 2,047                                       | 24,956                                                                |
|                          | Filled prescriptions                   | 92,706,631                 | 803                                   | 39,925,529                       | 346                                         | 356                                                                   |
|                          | Home care                              | 262,819,364                | 2,276                                 | 179,189,377                      | 1,552                                       | 1,443                                                                 |
|                          | Nursing home / sheltered accommodation | 710,435,792                | 6,152                                 | 461,833,282                      | 4,000                                       | 1,882                                                                 |
|                          | Total cost (excl. lost productivity)   | 1,817,080,811              | 15,736                                | 1,009,612,232                    | 8,743                                       | 30,654                                                                |
| Traumatic brain injury   | Primary sector                         | 83,545,461                 | 338                                   | 18,644,498                       | 75                                          | 140                                                                   |
|                          | Secondary sector - Outpatient          | 239,309,856                | 968                                   | 69,116,574                       | 280                                         | 707                                                                   |
|                          | Secondary sector - Inpatient           | 428,225,272                | 1,732                                 | 212,472,590                      | 859                                         | 7,836                                                                 |
|                          | Filled prescriptions                   | 75,591,648                 | 306                                   | 26,356,451                       | 107                                         | 117                                                                   |
|                          | Home care                              | 92,933,811                 | 376                                   | 50,946,346                       | 206                                         | 438                                                                   |
|                          | Nursing home / sheltered accommodation | 277,317,019                | 1,122                                 | 163,141,079                      | 660                                         | 950                                                                   |
|                          | Total cost (excl. lost productivity)   | 1,196,923,068              | 4,841                                 | 540,677,538                      | 2,187                                       | 10,188                                                                |

Abbreviations: EUR, Euro.

**Suppl. Table 5. Lost productivity in persons with prevalent brain disorders in Denmark in 2015, and incident brain disorders in Denmark during 2011-2015.**

| Brain disorder                           | Lost productivity associated with illness  |                                                       |                                                                           | Lost productivity due to premature death                           |                                                                               |                                                                                                       |
|------------------------------------------|--------------------------------------------|-------------------------------------------------------|---------------------------------------------------------------------------|--------------------------------------------------------------------|-------------------------------------------------------------------------------|-------------------------------------------------------------------------------------------------------|
|                                          | Attributable lost production in 2015 (EUR) | Attributable lost production per person in 2015 (EUR) | Attributable lost production per person in the year after diagnosis (EUR) | Attributable lost production among patients who died in 2015 (EUR) | Attributable lost production per person among patients who died in 2015 (EUR) | Attributable lost production per person among patients who died within one year after diagnosis (EUR) |
| Any brain disorder                       | 10,871,306,597                             | 15,471                                                | 11,501                                                                    | 310,599,261                                                        | 66,595                                                                        | 176,821                                                                                               |
| Alcohol abuse                            | 2,177,095,714                              | 30,509                                                | 26,454                                                                    | 60,885,257                                                         | 30,519                                                                        | 83,486                                                                                                |
| Anxiety disorders                        | 1,540,715,518                              | 19,281                                                | 19,717                                                                    | 32,197,400                                                         | 59,515                                                                        | 145,515                                                                                               |
| Bipolar disorder                         | 474,459,456                                | 27,521                                                | 25,383                                                                    | 6,136,984                                                          | 37,883                                                                        | 136,861                                                                                               |
| Brain tumours                            | 62,414,375                                 | 8,259                                                 | 15,068                                                                    | 44,062,492                                                         | 174,851                                                                       | 205,107                                                                                               |
| Cerebral palsy                           | 126,484,627                                | 24,291                                                | 31,767                                                                    | 487,951                                                            | 7,999                                                                         | 55,995                                                                                                |
| Dementia                                 | 118,974,339                                | 32,436                                                | 28,305                                                                    | 1,408,193                                                          | 8,140                                                                         | 28,505                                                                                                |
| Depression                               | 2,900,683,027                              | 21,708                                                | 20,838                                                                    | 64,470,952                                                         | 63,706                                                                        | 162,215                                                                                               |
| Developmental and behavioural disorders  | 845,403,290                                | 14,455                                                | 22,423                                                                    | 6,886,963                                                          | 47,171                                                                        | 96,899                                                                                                |
| Drug abuse                               | 1,330,382,612                              | 29,742                                                | 24,512                                                                    | 14,271,378                                                         | 22,908                                                                        | 67,596                                                                                                |
| Eating disorders                         | 83,103,235                                 | 5,798                                                 | 6,941                                                                     | 1,407,442                                                          | 54,132                                                                        | 25,604                                                                                                |
| Epilepsy                                 | 757,818,260                                | 16,449                                                | 18,764                                                                    | 39,647,665                                                         | 61,469                                                                        | 167,731                                                                                               |
| Headache                                 | 490,757,570                                | 6,493                                                 | 6,165                                                                     | 21,177,971                                                         | 101,330                                                                       | 174,465                                                                                               |
| Infections of the central nervous system | 30,214,014                                 | 1,814                                                 | 2,093                                                                     | 9,137,033                                                          | 103,830                                                                       | 152,402                                                                                               |
| Intellectual disability                  | 528,043,228                                | 29,465                                                | 30,237                                                                    | 278,285                                                            | 1,457                                                                         | 9,078                                                                                                 |
| Multiple sclerosis                       | 189,128,371                                | 16,804                                                | 9,354                                                                     | 1,721,160                                                          | 15,367                                                                        | 142,356                                                                                               |
| Neuromuscular disorders                  | 61,263,234                                 | 14,022                                                | 9,262                                                                     | 1,733,127                                                          | 36,875                                                                        | 106,274                                                                                               |
| Other neurodegenerative disorders        | 31,346,429                                 | 27,716                                                | 21,953                                                                    | 3,829,300                                                          | 55,497                                                                        | 134,409                                                                                               |
| Parkinson's disease                      | 32,248,038                                 | 22,662                                                | 14,259                                                                    | 3,565                                                              | 105                                                                           | 49,396                                                                                                |
| Personality disorders                    | 1,675,321,683                              | 25,663                                                | 22,217                                                                    | 13,071,803                                                         | 34,858                                                                        | 105,239                                                                                               |
| Polyneuropathy                           | 238,332,654                                | 16,662                                                | 16,701                                                                    | 8,543,728                                                          | 29,873                                                                        | 78,341                                                                                                |
| Schizophrenia spectrum disorders         | 1,707,738,198                              | 33,710                                                | 26,581                                                                    | 9,960,281                                                          | 17,173                                                                        | 90,396                                                                                                |
| Sleep disorders                          | 336,760,666                                | 8,691                                                 | 8,554                                                                     | 18,811,390                                                         | 79,373                                                                        | 133,551                                                                                               |
| Stress-related disorders                 | 3,167,569,516                              | 19,310                                                | 19,520                                                                    | 63,414,446                                                         | 69,917                                                                        | 175,773                                                                                               |
| Stroke                                   | 630,213,779                                | 16,502                                                | 14,382                                                                    | 25,874,307                                                         | 39,085                                                                        | 140,923                                                                                               |
| Traumatic brain injury                   | 1,241,809,744                              | 7,179                                                 | 7,245                                                                     | 41,136,013                                                         | 48,739                                                                        | 121,008                                                                                               |

Abbreviations: EUR, Euro.

## Supplementary figures

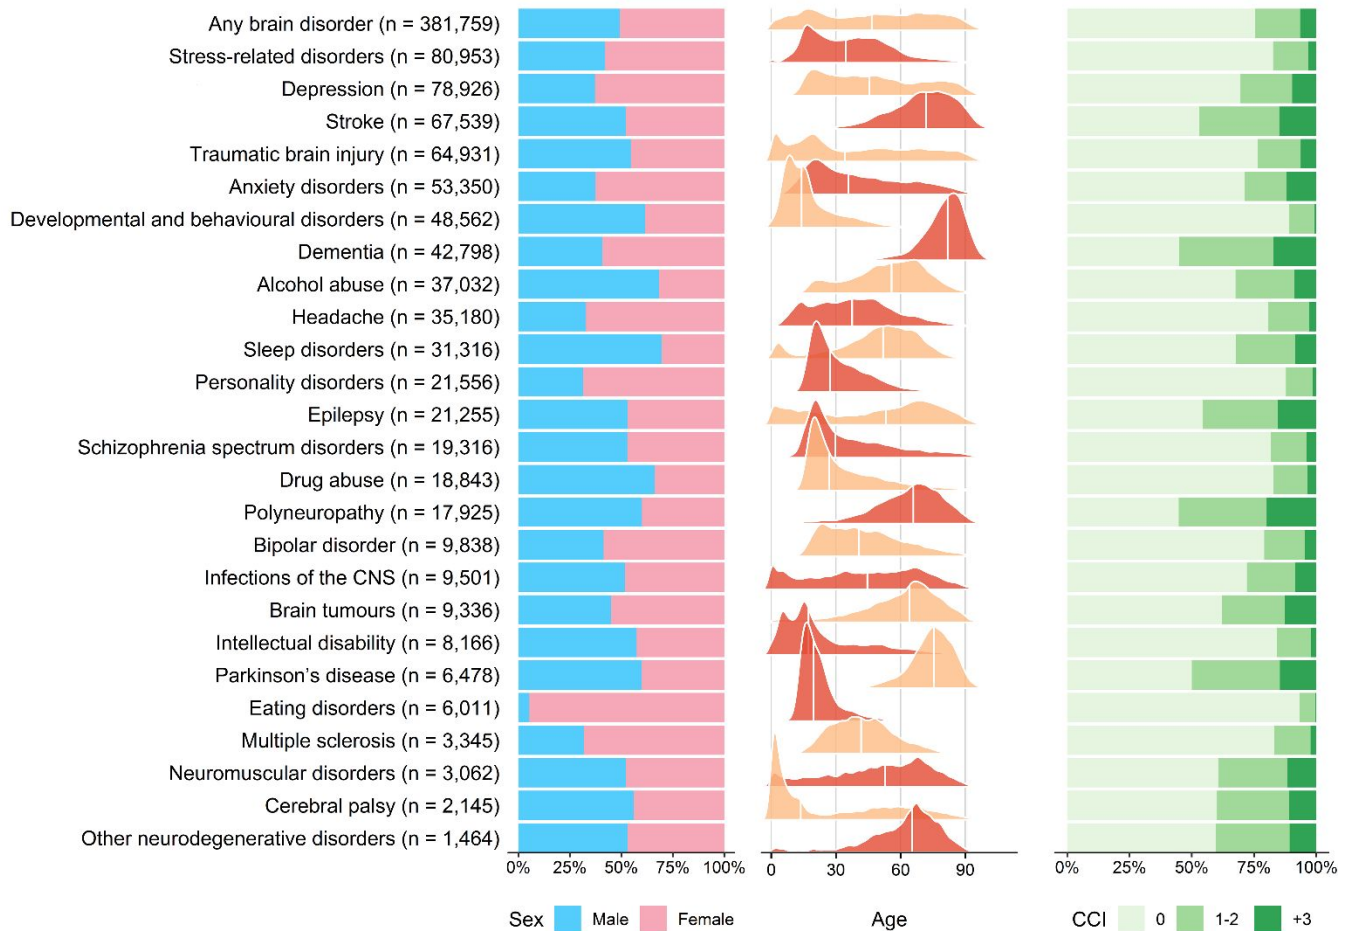

**Suppl. Figure 1. Characteristics of patients with incident brain disorders in Denmark during 2011-2015 sorted from highest to lowest incidence (the white line in the age distribution represents the median age in each cohort).**

Abbreviations: CNS, central nervous system; CCI, Charlson Comorbidity Index

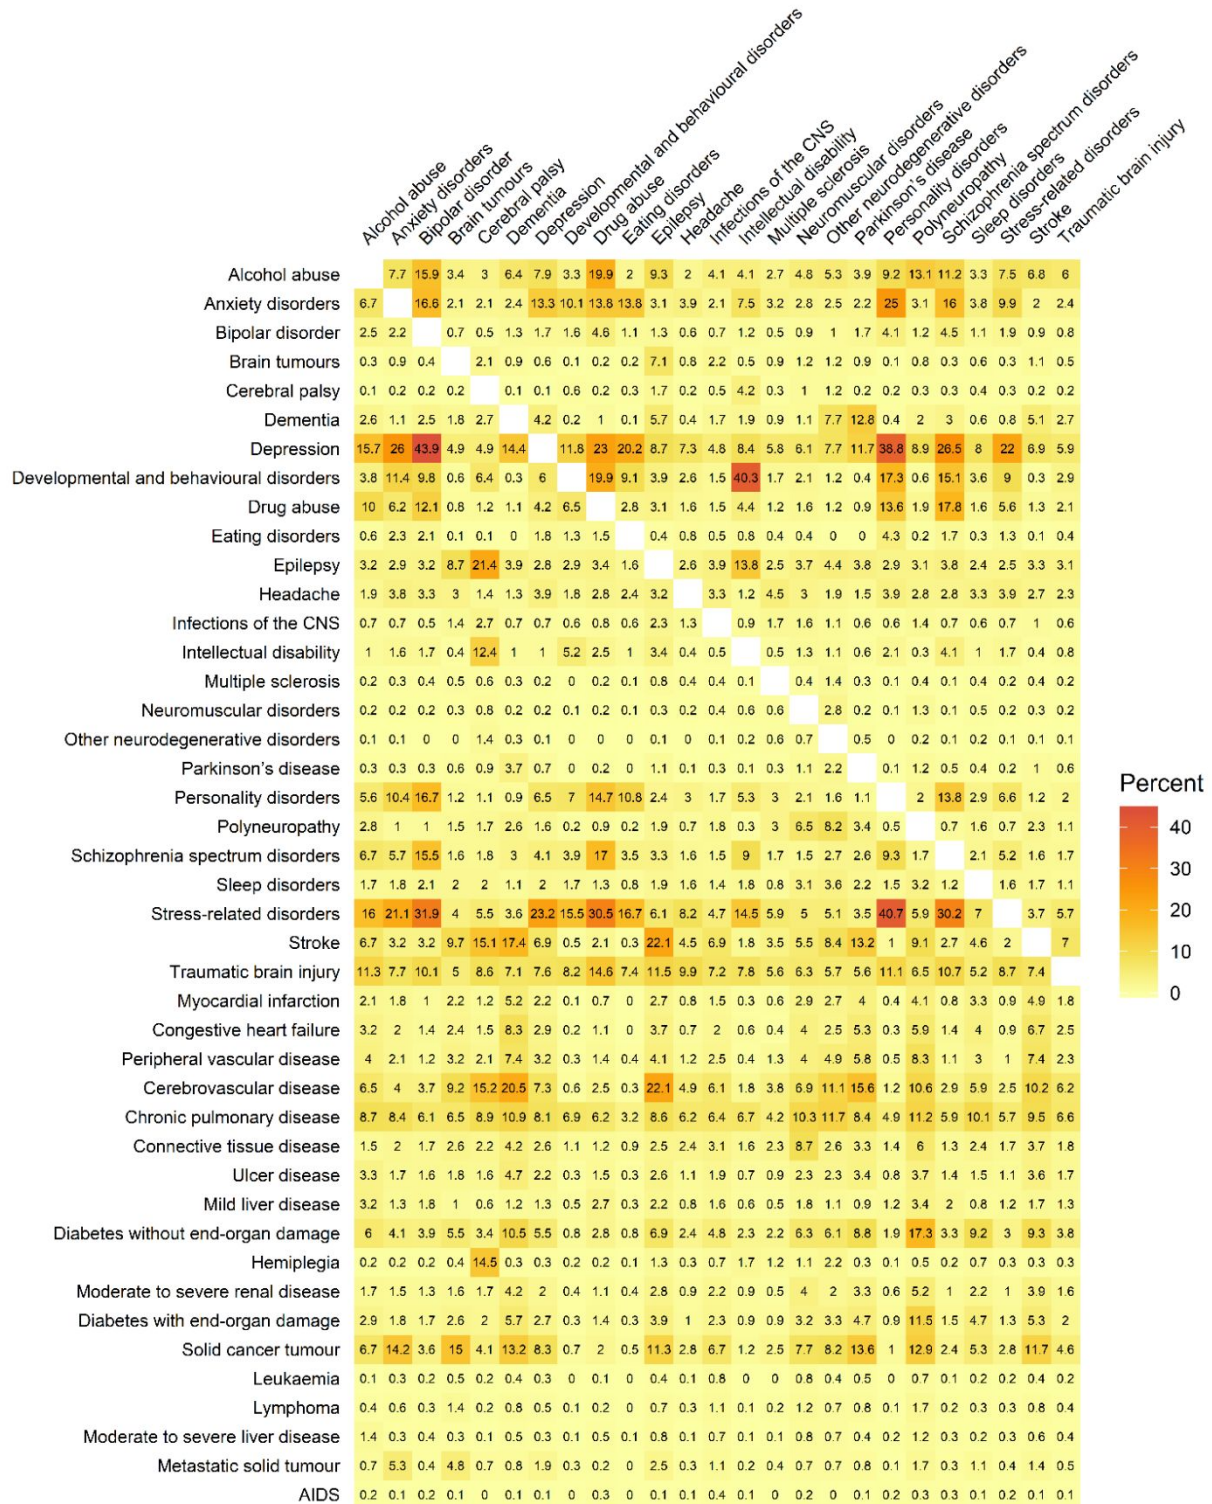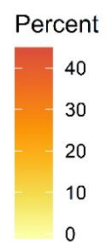

Suppl. Figure 2. Proportion of persons with incident brain disorders in the Danish population during 2011-2015 (columns), who had been diagnosed with comorbid brain or non-psychiatric disorders included in the Charlson Comorbidity Index up to 10 years before the index date of the brain disorder (rows).  
Abbreviations: CNS, central nervous system



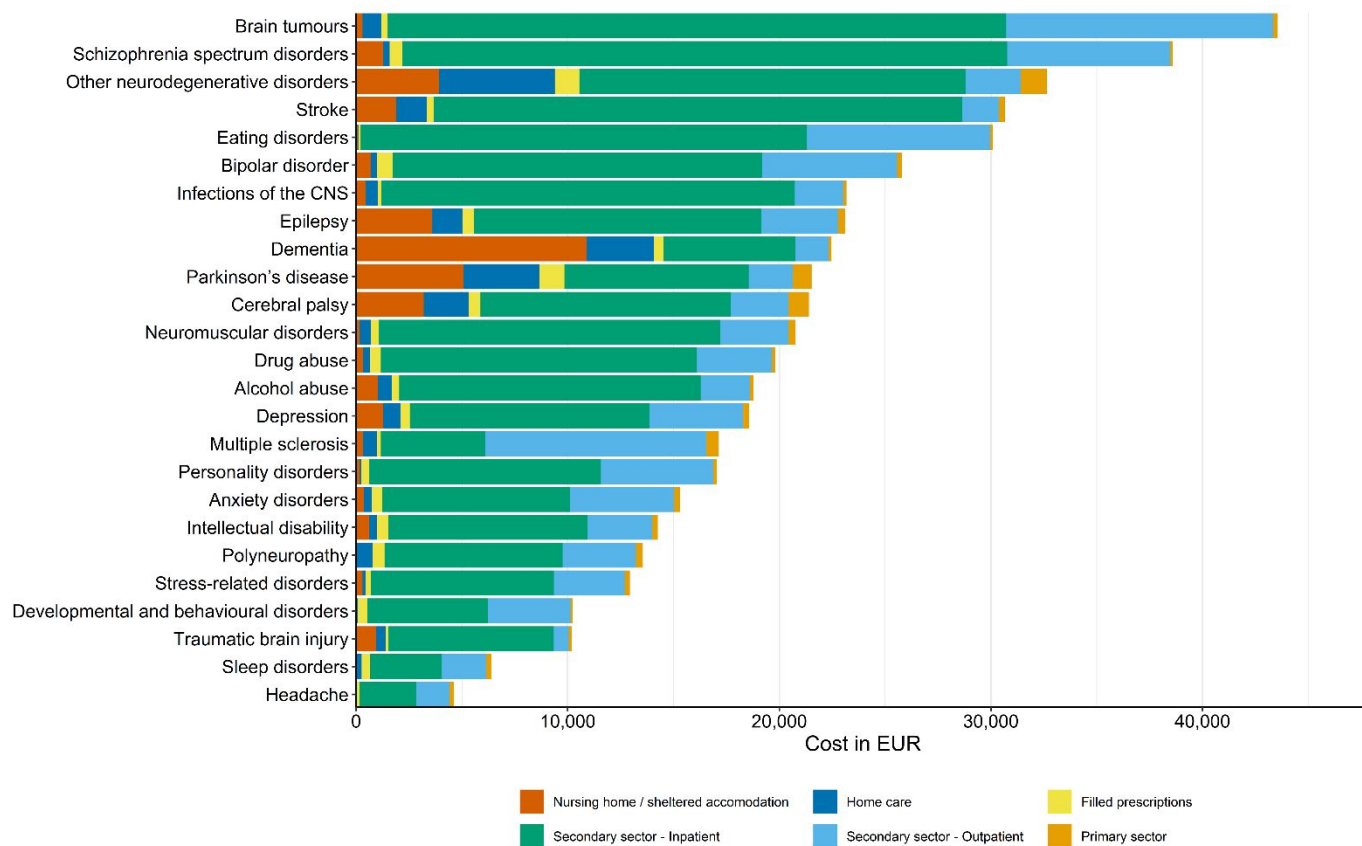

**Suppl. Figure 3. Attributable direct costs per person during the first year after diagnosis in persons with incident brain disorders in Denmark during 2011-2015 (in 2015 prices) sorted from highest to lowest costs.**

**Abbreviations: CNS, central nervous system**



**Suppl. Figure 4. Occurrence of brain disorders in the Danish population including incidence during 2011-2015 and prevalence in 2015. Alcohol abuse, bipolar disorder, dementia, depression, drug abuse, headache, multiple sclerosis, Parkinson's disease, and sleep disorders were identified by either recorded hospital diagnoses or filled prescriptions of relevant medication, and all other brain disorders were identified by recorded hospital diagnoses.**

Abbreviations: CNS, central nervous system

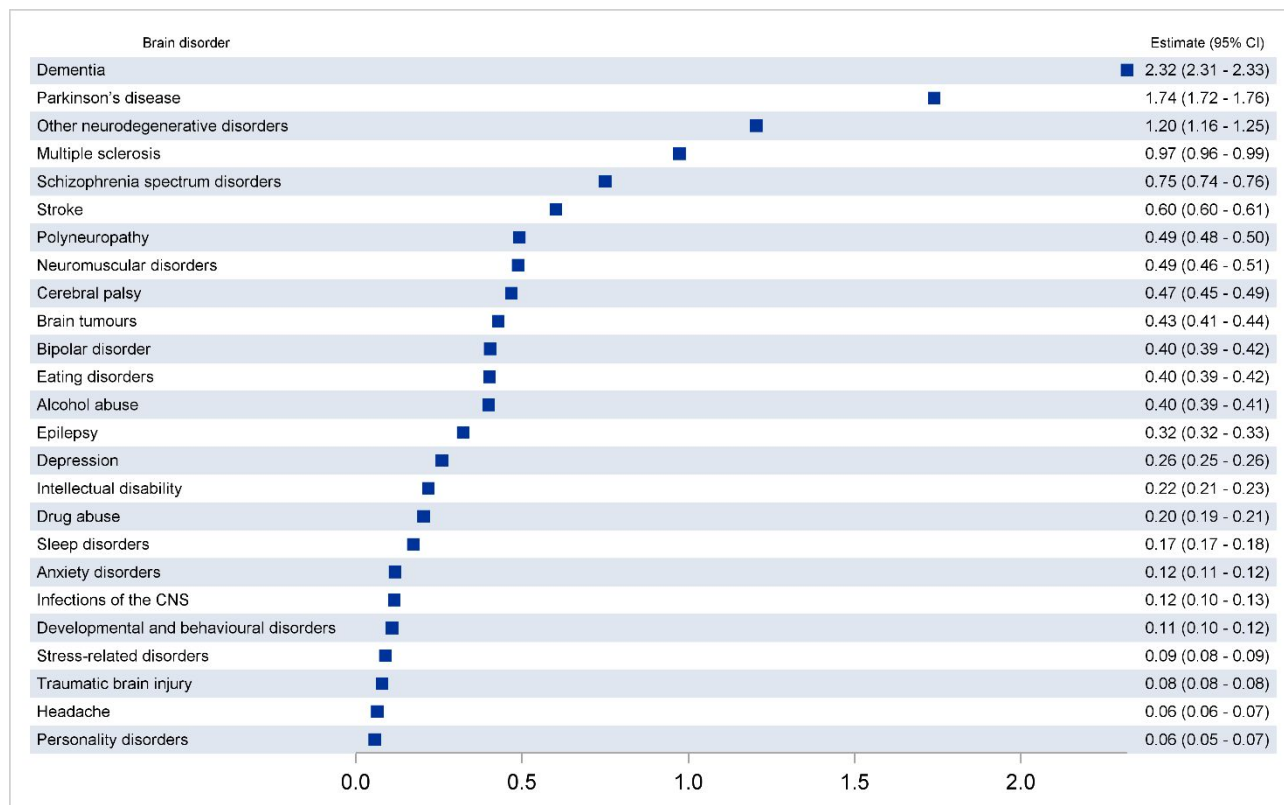

**Suppl. Figure 5. Costs in €10,000 associated with each of 25 groups of brain disorders adjusted for comorbid brain disorders in persons with prevalent brain disorders in Denmark in 2015 (2015 prices).**

Abbreviations: CI, confidence interval; CNS, central nervous system

## Supplementary references

1. Schmidt M, Schmidt SAJ, Adelborg K, et al. The Danish health care system and epidemiological research: from health care contacts to database records. *Clin Epidemiol* 2019;11:563-91. doi: 10.2147/clep.S179083
2. Schmidt M, Schmidt SA, Sandegaard JL, et al. The Danish National Patient Registry: a review of content, data quality, and research potential. *Clinical epidemiology* 2015;7:449-90. doi: 10.2147/CLEP.S91125 [doi]
3. Mors O, Perto GP, Mortensen PB. The Danish Psychiatric Central Research Register. *Scand J Public Health* 2011;39(7 Suppl):54-7. doi: 10.1177/1403494810395825
4. Ankjaer-Jensen A, Rosling P, Bilde L. Variable prospective financing in the Danish hospital sector and the development of a Danish case-mix system. *Health care management science* 2006;9(3):259-68.
5. Bilde L, Ankjaer-Jensen A, Danneskiold-Samsoe B. The "Health Benefit Basket" in Denmark: a description of entitlements, actors, and decision-making processes in the curative health sector. *Eur J Health Econ* 2005;Suppl:11-7. doi: 10.1007/s10198-005-0313-2
6. Pottegard A, Schmidt SAJ, Wallach-Kildemoes H, et al. Data Resource Profile: The Danish National Prescription Registry. *Int J Epidemiol* 2017;46(3):798-98f. doi: 10.1093/ije/dyw213
7. Statistics Denmark. Documentation of statistics [cited 2019 12/12]. Available from: <https://www.dst.dk/en/Statistik/dokumentation/documentationofstatistics> accessed 12 Dec 2019.

STROBE Statement—Checklist of items that should be included in reports of *cohort studies*

|                              | Item No | Recommendation                                                                                                                                                                                                                                                                                                                                                                                                |                                               |
|------------------------------|---------|---------------------------------------------------------------------------------------------------------------------------------------------------------------------------------------------------------------------------------------------------------------------------------------------------------------------------------------------------------------------------------------------------------------|-----------------------------------------------|
| <b>Title and abstract</b>    | 1       | (a) Indicate the study's design with a commonly used term in the title or the abstract<br>(b) Provide in the abstract an informative and balanced summary of what was done and what was found                                                                                                                                                                                                                 | title page<br>page 3                          |
| <b>Introduction</b>          |         |                                                                                                                                                                                                                                                                                                                                                                                                               |                                               |
| Background/rationale         | 2       | Explain the scientific background and rationale for the investigation being reported                                                                                                                                                                                                                                                                                                                          | page 6                                        |
| Objectives                   | 3       | State specific objectives, including any prespecified hypotheses                                                                                                                                                                                                                                                                                                                                              | page 6                                        |
| <b>Methods</b>               |         |                                                                                                                                                                                                                                                                                                                                                                                                               |                                               |
| Study design                 | 4       | Present key elements of study design early in the paper                                                                                                                                                                                                                                                                                                                                                       | page 7                                        |
| Setting                      | 5       | Describe the setting, locations, and relevant dates, including periods of recruitment, exposure, follow-up, and data collection                                                                                                                                                                                                                                                                               | page 7                                        |
| Participants                 | 6       | (a) Give the eligibility criteria, and the sources and methods of selection of participants. Describe methods of follow-up<br>(b) For matched studies, give matching criteria and number of exposed and unexposed                                                                                                                                                                                             | page 7<br>page 7                              |
| Variables                    | 7       | Clearly define all outcomes, exposures, predictors, potential confounders, and effect modifiers. Give diagnostic criteria, if applicable                                                                                                                                                                                                                                                                      | page 8-9                                      |
| Data sources/<br>measurement | 8*      | For each variable of interest, give sources of data and details of methods of assessment (measurement). Describe comparability of assessment methods if there is more than one group                                                                                                                                                                                                                          | page 8-9 +<br>Appendix 1                      |
| Bias                         | 9       | Describe any efforts to address potential sources of bias                                                                                                                                                                                                                                                                                                                                                     | page 10-11                                    |
| Study size                   | 10      | Explain how the study size was arrived at                                                                                                                                                                                                                                                                                                                                                                     | page 7                                        |
| Quantitative variables       | 11      | Explain how quantitative variables were handled in the analyses. If applicable, describe which groupings were chosen and why                                                                                                                                                                                                                                                                                  | page 8-9                                      |
| Statistical methods          | 12      | (a) Describe all statistical methods, including those used to control for confounding<br>(b) Describe any methods used to examine subgroups and interactions<br>(c) Explain how missing data were addressed<br>(d) If applicable, explain how loss to follow-up was addressed<br>(e) Describe any sensitivity analyses                                                                                        | page 9-10<br>page 9-10<br>NA<br>NA<br>page 10 |
| <b>Results</b>               |         |                                                                                                                                                                                                                                                                                                                                                                                                               |                                               |
| Participants                 | 13*     | (a) Report numbers of individuals at each stage of study—eg numbers potentially eligible, examined for eligibility, confirmed eligible, included in the study, completing follow-up, and analysed<br>(b) Give reasons for non-participation at each stage<br>(c) Consider use of a flow diagram                                                                                                               | page 11<br>NA<br>NA                           |
| Descriptive data             | 14*     | (a) Give characteristics of study participants (eg demographic, clinical, social) and information on exposures and potential confounders<br>(b) Indicate number of participants with missing data for each variable of interest<br>(c) Summarise follow-up time (eg, average and total amount)                                                                                                                | page 11+22<br>NA<br>-                         |
| Outcome data                 | 15*     | Report numbers of outcome events or summary measures over time                                                                                                                                                                                                                                                                                                                                                | page 11-12                                    |
| Main results                 | 16      | (a) Give unadjusted estimates and, if applicable, confounder-adjusted estimates and their precision (eg, 95% confidence interval). Make clear which confounders were adjusted for and why they were included<br>(b) Report category boundaries when continuous variables were categorized<br>(c) If relevant, consider translating estimates of relative risk into absolute risk for a meaningful time period | page 12<br>NA<br>NA                           |

|    |                          |    |                                                                                                                                                                            |            |
|----|--------------------------|----|----------------------------------------------------------------------------------------------------------------------------------------------------------------------------|------------|
| 1  | Other analyses           | 17 | Report other analyses done—eg analyses of subgroups and interactions, and sensitivity analyses                                                                             | page 13    |
| 2  |                          |    |                                                                                                                                                                            |            |
| 3  |                          |    |                                                                                                                                                                            |            |
| 4  | <b>Discussion</b>        |    |                                                                                                                                                                            |            |
| 5  | Key results              | 18 | Summarise key results with reference to study objectives                                                                                                                   | page 13-14 |
| 6  | Limitations              | 19 | Discuss limitations of the study, taking into account sources of potential bias or imprecision. Discuss both direction and magnitude of any potential bias                 | page 14-15 |
| 7  |                          |    |                                                                                                                                                                            |            |
| 8  | Interpretation           | 20 | Give a cautious overall interpretation of results considering objectives, limitations, multiplicity of analyses, results from similar studies, and other relevant evidence | page 15-16 |
| 9  |                          |    |                                                                                                                                                                            |            |
| 10 | Generalisability         | 21 | Discuss the generalisability (external validity) of the study results                                                                                                      | page 15-16 |
| 11 |                          |    |                                                                                                                                                                            |            |
| 12 | <b>Other information</b> |    |                                                                                                                                                                            |            |
| 13 | Funding                  | 22 | Give the source of funding and the role of the funders for the present study and, if applicable, for the original study on which the present article is based              | page 17    |
| 14 |                          |    |                                                                                                                                                                            |            |
| 15 |                          |    |                                                                                                                                                                            |            |
| 16 |                          |    |                                                                                                                                                                            |            |

\*Give information separately for exposed and unexposed groups.

**Note:** An Explanation and Elaboration article discusses each checklist item and gives methodological background and published examples of transparent reporting. The STROBE checklist is best used in conjunction with this article (freely available on the Web sites of PLoS Medicine at <http://www.plosmedicine.org/>, Annals of Internal Medicine at <http://www.annals.org/>, and Epidemiology at <http://www.epidem.com/>). Information on the STROBE Initiative is available at <http://www.strobe-statement.org>.

# BMJ Open

## OCCURRENCE, MORTALITY, AND COST OF BRAIN DISORDERS IN DENMARK: A POPULATION-BASED COHORT STUDY

|                                 |                                                                                                                                                                                                                                                                                                                                                                                                                                                                                                                        |
|---------------------------------|------------------------------------------------------------------------------------------------------------------------------------------------------------------------------------------------------------------------------------------------------------------------------------------------------------------------------------------------------------------------------------------------------------------------------------------------------------------------------------------------------------------------|
| Journal:                        | <i>BMJ Open</i>                                                                                                                                                                                                                                                                                                                                                                                                                                                                                                        |
| Manuscript ID                   | bmjopen-2020-037564.R2                                                                                                                                                                                                                                                                                                                                                                                                                                                                                                 |
| Article Type:                   | Original research                                                                                                                                                                                                                                                                                                                                                                                                                                                                                                      |
| Date Submitted by the Author:   | 20-Aug-2020                                                                                                                                                                                                                                                                                                                                                                                                                                                                                                            |
| Complete List of Authors:       | Vestergaard, Søren; Aarhus University Hospital, Department of Clinical Epidemiology<br>Rasmussen, Thomas; Aarhus University Hospital, Department of Clinical Epidemiology<br>Stallknecht, Sandra; NA, INCENTIVE<br>Olsen, Jens; NA, INCENTIVE<br>Skipper, Niels; Aarhus University, Department of Economics and Business Economics<br>Sørensen, Henrik T.; Aarhus University Hospital, Department of Clinical Epidemiology<br>Christiansen, Christian; Aarhus University Hospital, Department of Clinical Epidemiology |
| <b>Primary Subject Heading</b>: | Epidemiology                                                                                                                                                                                                                                                                                                                                                                                                                                                                                                           |
| Secondary Subject Heading:      | Epidemiology, Neurology, Public health, Mental health, Health economics                                                                                                                                                                                                                                                                                                                                                                                                                                                |
| Keywords:                       | EPIDEMIOLOGY, Health economics < HEALTH SERVICES ADMINISTRATION & MANAGEMENT, NEUROLOGY, PSYCHIATRY                                                                                                                                                                                                                                                                                                                                                                                                                    |
|                                 |                                                                                                                                                                                                                                                                                                                                                                                                                                                                                                                        |

SCHOLARONE™  
Manuscripts



I, the Submitting Author has the right to grant and does grant on behalf of all authors of the Work (as defined in the below author licence), an exclusive licence and/or a non-exclusive licence for contributions from authors who are: i) UK Crown employees; ii) where BMJ has agreed a CC-BY licence shall apply, and/or iii) in accordance with the terms applicable for US Federal Government officers or employees acting as part of their official duties; on a worldwide, perpetual, irrevocable, royalty-free basis to BMJ Publishing Group Ltd ("BMJ") its licensees and where the relevant Journal is co-owned by BMJ to the co-owners of the Journal, to publish the Work in this journal and any other BMJ products and to exploit all rights, as set out in our [licence](#).

The Submitting Author accepts and understands that any supply made under these terms is made by BMJ to the Submitting Author unless you are acting as an employee on behalf of your employer or a postgraduate student of an affiliated institution which is paying any applicable article publishing charge ("APC") for Open Access articles. Where the Submitting Author wishes to make the Work available on an Open Access basis (and intends to pay the relevant APC), the terms of reuse of such Open Access shall be governed by a Creative Commons licence – details of these licences and which [Creative Commons](#) licence will apply to this Work are set out in our licence referred to above.

Other than as permitted in any relevant BMJ Author's Self Archiving Policies, I confirm this Work has not been accepted for publication elsewhere, is not being considered for publication elsewhere and does not duplicate material already published. I confirm all authors consent to publication of this Work and authorise the granting of this licence.



# OCCURRENCE, MORTALITY, AND COST OF BRAIN DISORDERS IN DENMARK: A POPULATION-BASED COHORT STUDY

Søren Viborg Vestergaard<sup>1</sup>, Thomas Bøjer Rasmussen<sup>1</sup>, Sandra Stallknecht<sup>2</sup>, Jens Olsen<sup>2</sup>, Niels Skipper<sup>3</sup>,  
Henrik Toft Sørensen<sup>1</sup>, Christian Fynbo Christiansen<sup>1</sup>

<sup>1</sup> Department of Clinical Epidemiology, Aarhus University Hospital, Aarhus, Denmark

<sup>2</sup> INCENTIVE, Holte, Denmark

<sup>3</sup> Department of Economics and Business Economics, Aarhus University, Aarhus, Denmark

**Email addresses:** [sovi@clin.au.dk](mailto:sovi@clin.au.dk), [tbr@clin.au.dk](mailto:tbr@clin.au.dk), [ses@incentive.dk](mailto:ses@incentive.dk), [jo@incentive.dk](mailto:jo@incentive.dk),  
[nskipper@econ.au.dk](mailto:nskipper@econ.au.dk), [hts@clin.au.dk](mailto:hts@clin.au.dk), [cfc@clin.au.dk](mailto:cfc@clin.au.dk)

**ORCID IDs:** SVV, [0000-0002-8445-7758](https://orcid.org/0000-0002-8445-7758); TBR, [0000-0003-0120-1712](https://orcid.org/0000-0003-0120-1712); SS, [0000-0002-1721-3665](https://orcid.org/0000-0002-1721-3665); NS, [0000-0001-5766-4420](https://orcid.org/0000-0001-5766-4420); HTS, [0000-0003-4299-7040](https://orcid.org/0000-0003-4299-7040); CFC, [0000-0002-0727-953X](https://orcid.org/0000-0002-0727-953X)

**Corresponding author address:** Søren Viborg Vestergaard, [sovi@clin.au.dk](mailto:sovi@clin.au.dk), Department of Clinical Epidemiology, Aarhus University Hospital, Olof Palmes Alle 43-45, 8200 Aarhus N, Denmark

**Word count, main text:** 3,992 words

**Word count, abstract:** 298 words

**Keywords:** Brain disorders, mental disorders, neurologic disorders, epidemiology, cost-of-illness

## ABSTRACT

### Objectives

To examine the occurrence of brain disorders (*i.e.*, neurological and mental disorders) in Denmark and mortality and cost-of-illness among affected persons.

### Design

Matched cohort study.

### Setting

We obtained routinely collected registry data on all Danish residents during 1995-2015.

### Participants

We identified all persons alive on 1 January 2015 with a diagnosis of 25 specific brain disorders (prevalent cohort) and all persons with an incident diagnosis during 2011-2015 (incident cohort). Each person was matched on age and sex with 10 persons from the general population without the brain disorder of interest.

### Primary and secondary outcome measures

Prevalence and incidence of hospital-diagnosed brain disorders, 1-year absolute and relative mortality, and attributable direct and indirect costs-of-illness compared with the corresponding matched cohorts.

### Results

We identified 1,075,081 persons with at least one prevalent brain disorder (*any brain disorder*) on 1 January 2015, corresponding to 18.9% of the Danish population. The incidence rate of *any brain disorder* during 2011-2015 was 1,349 per 100,000 person-years (95% confidence interval [CI]: 1,345-1,353). One-year mortality after diagnosis was increased in persons with *any brain disorder* (hazard ratio = 4.7 [95% CI: 4.7-4.8]) and in persons in every group of specific brain disorders compared to the matched cohort from the general population. The total attributable direct costs of brain disorders in 2015 were €5.2 billion and

1  
2  
3  
4 total attributable indirect costs were €11.2 billion. Traumatic brain injury, stress-related disorders,  
5  
6 depression, and stroke were the most common brain disorders. Attributable costs were highest for  
7  
8 depression, dementia, stress-related disorders, and stroke.  
9

## 10 **Conclusions**

11  
12  
13 One in five Danish residents alive on 1 January 2015 had been diagnosed with at least one brain disorder,  
14  
15 and mortality was five times higher in persons with any diagnosed brain disorder than in the general  
16  
17 population. We found high attributable direct and indirect costs of brain disorders.  
18  
19  
20  
21  
22  
23  
24  
25  
26  
27  
28  
29  
30  
31  
32  
33  
34  
35  
36  
37  
38  
39  
40  
41  
42  
43  
44  
45  
46  
47  
48  
49  
50  
51  
52  
53  
54  
55  
56  
57  
58  
59  
60

1  
2  
3  
4  
5  
6  
7  
8  
9  
10  
11  
12  
13  
14  
15  
16  
17  
18  
19  
20  
21  
22  
23  
24  
25  
26  
27  
28  
29  
30  
31  
32  
33  
34  
35  
36  
37  
38  
39  
40  
41  
42  
43  
44  
45  
46  
47  
48  
49  
50  
51  
52  
53  
54  
55  
56  
57  
58  
59  
60

## STRENGTHS AND LIMITATIONS OF THIS STUDY

- We examined epidemiology and societal costs of hospital-diagnosed brain disorders using individual-level data on a well-defined population with complete follow-up.
- Both epidemiology and cost were estimated among persons with one of 25 specific brain disorders, and among persons with any brain disorders taking into account comorbid disorders.
- We identified persons with incident brain disorders during 2011-2015, whereas persons alive on 1 January 2015 with brain disorders diagnosed from 1995 to 2014 were considered prevalent.
- We estimated 1-year mortality among persons with incident brain disorders, and direct and indirect societal costs among persons with prevalent brain disorders.
- Direct costs included cost of services in primary care, secondary care, and costs of medication, nursing home, sheltered accommodation, personal nursing, home nurse visits, and hospital-based neuro rehabilitation, whereas lost productivity was considered indirect costs.

## BACKGROUND

Brain disorders, including both neurological and mental disorders, are the leading cause of years lived with disability worldwide.<sup>1,2</sup> In 2010, it was estimated that 260 million persons in Europe (~50% of the population) lived with a brain disorder with an estimated total cost-of-illness of €798 billion.<sup>3,4</sup> Based on this appraisal, mental disorders alone were estimated to account for 4.1% of European countries' combined gross domestic product (GDP) in 2015.<sup>5</sup> The global burden of brain disorders is expected to double between 2010 and 2030.<sup>6,7</sup>

Previous estimates of overall occurrence and cost of brain disorders relied on heterogeneous data sources without individual-level data. This excluded consideration of comorbid brain disorders in estimates of the incidence, prevalence, mortality, and cost-of-illness of brain disorders.<sup>2,3,8</sup> Therefore, single persons with multiple disorders were counted more than once, causing potential overestimation of the occurrence.

Previous studies also focused on cause-specific mortality rather than all-cause mortality. This could have led to underestimation of excess mortality associated with brain disorders due to incompletely recorded brain disorders on death certificates.<sup>2,9</sup> Thus, there is a need for valid updated estimates of occurrence, mortality, and cost of brain disorders to better understand the public health burden and healthcare planning needs.<sup>7</sup>

We conducted this population-based study using routinely collected individual-level registry data to examine the prevalence and incidence of brain disorders in the Danish population during 2011-2015, as well as mortality and cost-of-illness in these patients.

## METHODS

### Setting

We conducted a population-based cohort study encompassing the entire Danish population during 2011-2015. In Denmark, healthcare is primarily tax-funded with equal access for every Danish resident. We examined occurrence, mortality, and costs of brain disorders using nationwide data from healthcare and socioeconomic registries.<sup>10</sup>

### Study design and participants

The following 25 predefined groups of brain disorders were examined: *alcohol abuse, anxiety disorders, bipolar disorder, brain tumours, cerebral palsy, dementia, depression, developmental and behavioural disorders, drug abuse, eating disorders, epilepsy, headache, infections of the central nervous system, intellectual disability, multiple sclerosis, neuromuscular disorders, other neurodegenerative disorders, Parkinson's disease, personality disorders, polyneuropathy, schizophrenia spectrum disorders, sleep disorders, stress-related disorders, stroke, and traumatic brain injury*. Disorders were selected if expected to be common or critical, and we prioritized to select groups of disorders examined in previous studies to enable comparison of our results.<sup>2, 3</sup> For each of 25 specific brain disorders, we established two cohorts: a prevalent cohort of persons alive on 1 January 2015 who had a diagnosis of the specific brain disorder recorded during the 1995-2014 period and an incident cohort of persons with a first-time diagnosis recorded during the 1 January 2011 to 31 December 2015 period. We also identified every Danish resident with *any brain disorder, i.e.*, each person with any of the specific 25 disorders was identified on the date of his or her first diagnosis. To avoid double-counting, every person could only be included once in the *any brain disorder* cohort.

For each of the 25 specific brain disorder cohorts and the *any brain disorder* cohort, we created a matched comparison cohort for the incident cohort and a matched comparison cohort for the prevalent cohort. Each person in the brain disorder cohorts was matched to 10 living persons from the general population on birth

1  
2  
3  
4 year and sex (sampled with replacement).<sup>11</sup> Matched persons could not have the brain disorder of interest  
5  
6 as of the index date of the person with the brain disorder. The index dates of matching were the date of the  
7  
8 brain disorder diagnosis for the incident cohort and 1 January 2015 for the prevalent cohort.  
9

## 10 11 **Variables**

12  
13  
14 The unambiguous personal identifier assigned to every Danish resident enabled us to identify and link every  
15  
16 person across national registries to estimate occurrence, mortality, and cost-of-illness of brain disorders on  
17  
18 the individual level (see detailed description of the data sources in Appendix 1).<sup>10</sup>  
19

20  
21 We identified persons with brain disorders by means of inpatient and outpatient hospital diagnoses (both  
22  
23 primary and secondary diagnoses) coded in the Danish National Patient Registry according to the  
24  
25 *International Classification of Diseases, Tenth Revision* (ICD-10).<sup>12</sup> ICD codes are provided in Appendix 2.  
26  
27

28 To estimate mortality, we retrieved the dates of death of persons who died during the study period from  
29  
30 the Danish Civil Registration System.<sup>10</sup>  
31

32  
33 To estimate direct costs, we obtained individual-level information on all primary care services provided by  
34  
35 general practitioners and dentists from the Danish Health Service Registry,<sup>13</sup> individual-level medication  
36  
37 expenditures from the Danish National Prescription Registry,<sup>14</sup> and individual-level information on nursing  
38  
39 home or sheltered accommodation, personal nursing and other personal care, home nurse visits, and  
40  
41 hospital-based neuro rehabilitation from Statistics Denmark.<sup>15</sup> We also computed costs of secondary care  
42  
43 including hospital inpatient admissions, outpatient specialist clinic visits, and emergency room contacts  
44  
45 based on the Diagnosis Related Group (DRG) and Danish Ambulatory Grouping System (DAGS) tariffs.<sup>16</sup>  
46  
47

48 Medication costs were computed using market prices for prescriptions filled at outpatient pharmacies and  
49  
50 in-hospital medication costs were included in the DRG/DAGS tariffs. To estimate indirect costs, we first  
51  
52 estimated lost productivity associated with illness by subtracting the personal income of persons in the  
53  
54 matched comparison cohorts from the personal income of persons with brain disorders (all before taxes).  
55  
56

57 We then estimated lost productivity due to premature death (difference in actual age of death and  
58  
59  
60

1  
2  
3  
4 expected age at death based on the average life expectancy of persons of same age and sex in Denmark).

5  
6 We obtained 2015 cost information for persons in the prevalent cohort and their comparison cohort and  
7  
8 from index date for persons in the incident cohort and their comparison cohort.

9  
10  
11 Finally, we obtained information on prior comorbid brain disorders and on prior non-mental disorders  
12  
13 included in the Charlson Comorbidity Index (CCI) up to 10 years before the index date of every person in  
14  
15 the brain disorder and comparison cohorts.<sup>12</sup> Using the comorbid diseases included in the CCI, we  
16  
17 calculated a CCI score for every person (CCI score: 0 = low, 1-2 = medium, 3+ = high comorbidity).<sup>17, 18</sup>

## 20 **Statistical analyses**

### 23 *Occurrence*

24  
25 We used any diagnosis from 1 January 1995 to 31 December 2014 as the basis for computing the period  
26  
27 prevalence of each of the 25 brain disorders in persons alive on 1 January 2015. To estimate the average  
28  
29 annual incidence of the different brain disorders, we computed incidence rates (IRs) of newly diagnosed  
30  
31 persons per 100 000 person-years at risk between 1 January 2011 and 31 December 2015. We considered a  
32  
33 person to be at risk of an incident specific brain disorder only if he or she did not have a diagnosis of that  
34  
35 specific brain disorder during 1995-2010. We characterised persons with brain disorders by age, sex, CCI  
36  
37 conditions, and CCI score on the index date across the 25 groups of disorders.

### 42 *Mortality*

43  
44 We computed 1-year mortality for persons with brain disorders and for persons in their matched  
45  
46 comparison cohorts and compared these by means of crude and adjusted hazard ratios (HRs) obtained  
47  
48 from an unstratified Cox regression model adjusted for age, sex, and CCI score.

### 52 *Cost-of-illness*

53  
54 To estimate the economic burden of the 25 brain disorders, we used the human capital approach to  
55  
56 conduct a societal cost-of-illness analysis including both direct and indirect individual-level costs.<sup>19, 20</sup> For  
57  
58  
59  
60



1  
2  
3  
4 each brain disorder, we computed direct and indirect costs-of-illness for every individual in our study  
5  
6 population. We estimated both overall annual costs and average annual costs per person. Direct costs were  
7  
8 computed both as actual direct costs (*i.e.*, costs of healthcare services) and attributable direct costs (*i.e.*,  
9  
10 the cost of healthcare services for persons with brain disorders minus the cost of healthcare services for  
11  
12 persons of the same age and sex in the comparison cohorts). For persons with incident brain disorders, we  
13  
14 further computed the distribution of the attributable direct costs per person during the first year after the  
15  
16 diagnosis, as we expected substantial direct and indirect costs during this year.  
17  
18

19  
20 We computed attributable indirect costs (*i.e.*, loss of productivity) in patients of working age, *i.e.*, ages 18-  
21  
22 65 years. In persons living with brain disorder diagnoses, we computed loss of productivity associated with  
23  
24 illness as yearly income before taxes in persons with brain disorders subtracted from the yearly income in  
25  
26 living members of the comparison cohorts. For persons who died after diagnoses of brain disorders, we  
27  
28 estimated loss of productivity due to premature death as the annual income during the year before death  
29  
30 multiplied by the number of lost years of life, assuming that they otherwise would have survived to age 66  
31  
32 years (accounting for the risk of dying each year and discounting future costs with 4% per annum).<sup>19, 20</sup>  
33  
34

### 35 36 *Sensitivity analyses*

37  
38  
39 Patients with *alcohol abuse, bipolar disorder, dementia, depression, drug abuse, headache, multiple*  
40  
41 *sclerosis, Parkinson's disease, and sleep disorders* are commonly treated in general practice with  
42  
43 medication specific for those disorders. Thus, we performed sensitivity analyses that included both persons  
44  
45 with hospital diagnoses and persons who filled prescriptions for relevant pharmacological treatments of  
46  
47 these disorders (including information on indication for the prescription when relevant).<sup>14</sup> We repeated all  
48  
49 occurrence and cost analyses on these extended cohorts.  
50  
51

52  
53 In addition, we performed an ordinary least squares (OLS) regression to compute attributable direct costs,  
54  
55 in which we modelled the average annual costs per person for each group of brain disorders. This OLS  
56  
57 regression included every Danish resident (not only the matched cohorts) with age, sex, and each of the 25  
58  
59  
60

1  
2  
3  
4 brain disorders as explanatory variables, and thus, costs of every brain disorder was adjusted for costs of  
5  
6 comorbid brain disorders.  
7

8  
9 Analyses were performed using SAS version 9.4 (Cary, NC, USA), and visualization was made using Tidyverse  
10  
11 packages in R version 3.6.1.<sup>21</sup> The study was approved by the Danish Data Protection Agency through  
12  
13 registration at Aarhus University (record number 2016-051-000001/603). According to Danish legislation,  
14  
15 no approval from an ethics committee or informed consent from patients is required for registry-based  
16  
17 studies.  
18  
19

### 20 21 **Patient involvement statement**

22  
23 This study was done without patient involvement. Patients were not invited to comment on the study  
24  
25 design, to develop patient relevant outcomes, or interpret the results. Patients were not invited to  
26  
27 contribute to the writing or editing of the manuscript.  
28  
29

## 30 31 **RESULTS**

### 32 33 **Patient characteristics**

34  
35 The characteristics of 1 075 081 persons with prevalent brain disorders in 2015 are displayed in Figure 1,  
36  
37 and those of 381 759 persons with incident brain disorders during 2011-2015 are displayed in Suppl. Figure  
38  
39 1. Approximately half of persons with *any brain disorder* were female, occurrence was stable across ages,  
40  
41 and three out of four persons had no or mild comorbidity (both in the prevalent and incident cohorts)  
42  
43 (Figure 1, Suppl. Figure 1, Suppl. Table 1, and Suppl. Table 2). The proportions of persons with specific brain  
44  
45 disorders who were diagnosed with specific comorbid somatic or mental disorders before index date are  
46  
47 displayed in Suppl. Figure 2.  
48  
49  
50  
51

### 52 53 **Occurrence**

1  
2  
3  
4 On 1 January 2015, 18.9% of the Danish population had been diagnosed with *any brain disorder*. Among  
5  
6 persons without prior brain disorder diagnoses, the IR of *any brain disorder* was 1 349 per 100 000 person-  
7  
8 years during 2011-2015 (Suppl. Table 3).  
9

10  
11 The prevalence in 2015 and incidence in 2011-2015 of the 25 groups of brain disorders in the Danish  
12  
13 population are displayed in Figure 2. *Traumatic brain disorders* were the most common brain disorders,  
14  
15 with a prevalence of 4.4% (Figure 2 and Suppl. Table 3), followed by *stress-related disorders* (3.4%) and  
16  
17 *depression* (3.2%) (Figure 2).  
18  
19

20  
21 During 2011-2015, IRs were highest for *stress-related disorders* (286 per 100 000 person-years [95% CI: 284-  
22  
23 288]) and *depression* (279 per 100 000 person-years [95% CI: 277-281]) (Figure 2 and Suppl. Table 3).  
24  
25

### 26 **Mortality in persons with incident brain disorders**

27  
28 One-year mortality was 7.8% among persons with *any brain disorder*, compared to 1.9% in the comparison  
29  
30 cohort. After adjustment, persons with *any brain disorder* still had almost five-fold increased mortality  
31  
32 (HR=4.7 [95% CI: 4.7-4.8]), and the HRs were increased in every group of brain disorders. One-year  
33  
34 mortality was highest in persons with *other neurodegenerative disorders* (28.0%), *brain tumours* (24.5%),  
35  
36 *stroke* (20.8%), and *dementia* (20.3%). Of note, mortality was more than ten-fold increased in persons with  
37  
38 *other neurodegenerative disorders* (HR of 15.3 [95% CI: 13.2-17.7]), *brain tumours* (HR of 13.2 [95% CI:  
39  
40 12.4-14.0]), and *anxiety disorders* (HR of 12.8 [95% CI: 12.4-13.3]) (Figure 3).  
41  
42  
43  
44

### 45 **Cost-of-illness**

46  
47 The total direct attributable costs of *any brain disorder* were €5.2 billion in 2015 in Denmark, with  
48  
49 increased costs in every group of brain disorders. Specifically, attributable direct costs were highest in  
50  
51 patients with prevalent *depression* (€1.2 billion), *dementia* (€1.1 billion), and *stroke* (€1.0 billion) (Figure 4  
52  
53 and Suppl. Table 4). Importantly, the distribution of cost components varied considerably between brain  
54  
55 disorders (Figure 4 and Figure 5).  
56  
57  
58  
59  
60

1  
2  
3  
4 Of note, the highest attributable costs per person in persons with prevalent brain disorders in 2015 was  
5  
6 found in persons with *dementia* (€30K) and *Parkinson's disease* (€24K), mainly due to costs of nursing  
7  
8 home/sheltered accommodation (Figure 5 and Suppl. Table 4).  
9

10  
11 The average attributable direct costs of *any brain disorder* during the first year after diagnosis was €13K,  
12  
13 though these differed widely between persons with different disorders. Costs were highest during the first  
14  
15 year in persons with incident *brain tumours* (€44K) and *schizophrenia spectrum disorders* (€39K) (Suppl.  
16  
17 Figure 3 and Suppl. Table 4).  
18  
19

20  
21 Productivity of persons with brain disorders was reduced in every group of brain disorders. The total  
22  
23 indirect costs in 2015 were €11.2 billion in persons with *any brain disorder*, mostly due to loss of  
24  
25 productivity associated with illness (€10.9 billion) and less due to loss of productivity due to premature  
26  
27 death (€0.3 billion). Specifically, lost productivity was €3.2 billion in persons with *stress-related disorders*,  
28  
29 €2.9 billion in persons with *depression*, and €2.2 billion in persons with *alcohol abuse*. Finally, we found that  
30  
31 the indirect costs were largely made up of costs due to lost productivity in patients living with illness, while  
32  
33 costs due to lost productivity due to premature death contributed little (Figure 6 and Suppl. Table 5).  
34  
35

### 36 37 **Sensitivity analyses** 38

39  
40 Adding persons with filled prescriptions to the hospital-diagnosed cohorts, we found that occurrence of  
41  
42 *alcohol abuse*, *bipolar disorder*, and *dementia* increased little, while occurrence of *anxiety disorders*,  
43  
44 *depression*, *headache*, *Parkinson's disease*, and *sleep disorders* increased several-fold (Suppl. Figure 4).  
45

46  
47 Prevalence of *any brain disorders* increased to 30.2%, and total attributable costs in these persons in 2015  
48  
49 were €22.5 billion, of which direct costs were €6.5 billion and indirect costs were €16.0 billion (data not  
50  
51 shown).  
52

53  
54 In the OLS regression, we accounted for comorbid brain disorders when estimating per-person costs  
55  
56 associated with each brain disorder. We found that *dementia* (€23K) and *Parkinson's disease* (€17K) were  
57  
58 associated with the highest per-person additional direct cost-of-illness after adjustment for comorbid brain  
59  
60

1  
2  
3  
4 disorders (Suppl. Figure 5). Of note, removing outliers (the 99% percentile) changed results considerably,  
5  
6 indicating that the 1% of persons with highest costs-of-illness contributed a considerable share of the total  
7  
8 costs.  
9

## 10 11 **DISCUSSION**

12  
13  
14 We performed a study of occurrence, mortality, and cost of hospital-diagnosed brain disorders using high-  
15  
16 quality, individual-level data. Brain disorders were common: one in five persons in Denmark had prevalent  
17  
18 brain disorders in 2015. We found the most prevalent disorders to be *traumatic brain injury, stress-related*  
19  
20 *disorders, and depression*, whereas the disorders with the highest incidence were *stress-related disorders,*  
21  
22 *depression, and stroke*. One-year mortality was five-fold increased in persons with *any brain disorder* and  
23  
24 was increased in persons with any type of brain disorder. The attributable direct costs of persons with *any*  
25  
26 *brain disorder* were more than €5 billion. The more common brain disorders—*depression, dementia, and*  
27  
28 *stroke*—accounted for the highest total attributable direct costs among persons with prevalent disorders.  
29  
30 Attributable direct costs per person were highest in persons with *dementia and Parkinson's disease*. The  
31  
32 total attributable indirect costs due to loss of productivity in persons with any prevalent brain disorder  
33  
34 were twice as high as direct costs.  
35  
36  
37  
38  
39

40 Even though our findings are based on high-quality population-based registries, some limitations should be  
41  
42 considered when interpreting our findings. We may have underestimated the prevalence, incidence, and  
43  
44 total cost of non-severe brain disorders, as some patients were treated solely in general practice, or were  
45  
46 undiagnosed or untreated. This is especially relevant for disorder that are mainly treated in primary care, or  
47  
48 not treated at all, and therefore were not captured in our main analyses such as *anxiety*,<sup>22</sup> *headache*,<sup>23</sup> and  
49  
50 *sleep disorders*.<sup>24</sup> We addressed this in a sensitivity analysis that also identified patient-based filled  
51  
52 prescriptions for relevant medications.  
53  
54  
55  
56  
57  
58  
59  
60

1  
2  
3  
4 We estimated the period prevalence among living persons who had been diagnosed with brain disorders  
5  
6 during the preceding 20 years, even though some disorders may be reversible. We chose this approach as a  
7  
8 period with severe disease may affect future income and use of healthcare services.  
9

10  
11 We described non-mental comorbidity as the proportions of persons in each cohort previously diagnosed  
12  
13 with diseases from the CCI covering 19 groups of disorders. CCI score was used to adjust for confounding in  
14  
15 our mortality analyses, and as CCI score is an aggregated measure of comorbidity we cannot rule out  
16  
17 residual or unmeasured confounding in our estimates of HRs of death.<sup>17, 18, 25</sup>  
18  
19

20  
21 While we had detailed data on direct costs, we lacked information on municipally supported rehabilitation,  
22  
23 assistance supplies, and transportation costs related to treatment and rehabilitation. Similarly, our cost  
24  
25 analyses did not include intangible costs (e.g., due to decreased quality of life) and costs of informal care  
26  
27 provided by relatives, which may be considerable in conditions such as *dementia*.<sup>26</sup> Yet, we included costs  
28  
29 of nursing homes, sheltered accommodation, and home nursing, and we found the annual cost per person  
30  
31 with *dementia* (€30K) similar to that previously reported in developed countries.<sup>27, 28</sup>  
32  
33

34  
35 In estimating the indirect costs (i.e. loss of productivity) of illness and premature death we applied the  
36  
37 human capital approach. In the literature, this approach has been discussed and among others it has been  
38  
39 argued that application of the human capital approach leads to an over-estimation of the productivity  
40  
41 costs. Hence, alternative methods like the friction cost method have been proposed.<sup>19</sup> The idea behind the  
42  
43 friction cost method is that the amount of production lost due to disease depends on the time (friction  
44  
45 period) organizations need to restore the initial production level. Friction periods will differ by industry,  
46  
47 type of work etc. and the challenge is to estimate relevant friction periods but application of the friction  
48  
49 cost method leads to lower productivity cost estimates.<sup>19</sup> Taking these considerations into account, we  
50  
51 present our indirect cost estimates separately (Figure 6) making it possible to assess the results without  
52  
53 inclusion of the indirect costs.  
54  
55  
56  
57  
58  
59  
60

1  
2  
3  
4 Of note, our study described the cost-of-illness in patients with brain disorders, but did not isolate the cost  
5  
6 of the disease itself as patients with brain disorders are known to have a high load of comorbidity.<sup>29-31</sup>  
7  
8

9 We estimated the prevalence and incidence of *any brain disorder* using individual-level data, which allowed  
10  
11 us to capture concurrent brain disorders,<sup>29</sup> opposed to the prior studies based on literature reviews that  
12  
13 included a mix of hospital-diagnosed disorders and disorders reported in population surveys.<sup>3,5</sup> Beside  
14  
15 using different eligibility criteria, double counting of individuals with concurrent brain disorders may  
16  
17 explain the previously reported total 1-year prevalence of brain disorders of ~50% (260 million affected  
18  
19 among 514 million population in Europe),<sup>3</sup> which is markedly higher than what we found despite including  
20  
21 prevalent disorders during a 20-year period.<sup>8,9</sup> Compared to the reported prevalence of separate disorders,  
22  
23 we found markedly lower prevalence of anxiety (1.7% vs 12%), headache (1.7% vs 10%), depression (3.2%  
24  
25 vs 6.5%), and sleep disorders (1.1% vs 8.7%), despite the longer lookback in our study (20-years vs. 1-year  
26  
27 prevalence).<sup>3</sup> This may be explained by different data sources, as we in the main analyses only included  
28  
29 persons with hospital-diagnosed disorders. Importantly, when we included persons with filled prescriptions  
30  
31 in sensitivity analyses, the prevalence increased considerably indicating that we underestimated the  
32  
33 occurrence of these disorders in our main analyses.  
34  
35  
36  
37

38  
39 A recent Danish study reported a 2.5-fold increased mortality rate in persons with hospital-diagnosed  
40  
41 mental disorders compared to persons from the general population,<sup>32</sup> which is markedly lower than  
42  
43 mortality of *any brain disorders* in our study – likely explained by our use of different length of follow-up  
44  
45 (*i.e.*, long-term as opposed to 1-year).  
46  
47

48 We found that the total attributable direct and indirect costs of brain disorders in Denmark in 2015 were  
49  
50 €16.4 billion, equivalent to 5.9% of the Danish GDP (€273 billion in 2015).<sup>33</sup> This is only slightly higher than  
51  
52 the recently reported costs of mental illness alone of €15 billion in Denmark in 2015 corresponding to 5.4%  
53  
54 of the GDP.<sup>5</sup> However, when we included persons identified from filled prescriptions in addition to hospital-  
55  
56 based diagnoses in sensitivity analyses, the prevalence increased and total attributable costs of *any brain*  
57  
58  
59  
60

1  
2  
3  
4 *disorders* increased substantially, indicating that the costs may be higher than previously estimated when  
5  
6 not restricting to hospital-diagnosed persons.<sup>3, 5</sup>  
7  
8

9 Finally, previous Danish studies of selected brain disorders reported lower total costs of disorders such as  
10  
11 dementia,<sup>26</sup> stroke,<sup>34</sup> Parkinson's disease,<sup>35</sup> and epilepsy.<sup>36</sup> These studies did not include costs of home  
12  
13 nursing and nursing homes, and when accounting for that, our findings are comparable.<sup>26, 34-36</sup>  
14  
15

16 As the already large burden of brain disorders is expected to increase in the future,<sup>6</sup> prevention and  
17  
18 effective early intervention are essential.<sup>5</sup> The potential to prevent stroke, infections of the central nervous  
19  
20 system, and mental disorders is established, whereas the potential to prevent other neurological disorders  
21  
22 remains unclear.<sup>37, 38</sup> As comorbidity load is substantial in persons with brain disorders, cost-of-illness may  
23  
24 be reduced by preventing and improving treatment of comorbid disorders.<sup>31</sup>  
25  
26

27  
28 We found that one in five persons alive in Denmark had been diagnosed with a brain disorder. One-year  
29  
30 mortality was five-fold increased in persons with an incident brain disorder. Mortality was increased in  
31  
32 every group of brain disorders, underscoring the illness of these patients. The severity also was reflected in  
33  
34 the very high cost-of-illness in persons with brain disorders, with total attributable costs of €16.4 billion in  
35  
36 Denmark in 2015, including direct costs of €5.2 billion and indirect costs of €11.2 billion.  
37  
38

39 Occurrence of brain disorders is expected to increase in the future. As brain disorders already use a large  
40  
41 proportion of healthcare resources and come with high indirect costs, effective prevention and intervention  
42  
43 strategies must be developed.  
44  
45  
46  
47  
48

## 49 **ACKNOWLEDGEMENTS**

50  
51 We are grateful to the Board of Clinical Specialists in Neurology and Psychiatry for its invaluable input on  
52  
53 the definitions of brain disorders and its feedback on preliminary analyses. Specifically, we would like to  
54  
55 thank Prof. Grethe Andersen, Prof. Ulrik Becker, Prof. Niels Bilenberg, Assoc. Prof. Jakob Christensen, Prof.  
56  
57 Per Fink, Prof. David Gaist, Prof. Poul Jørgen Jennum, Assoc. Prof. Nils Koch-Henriksen, Prof. Jørgen  
58  
59  
60



1  
2  
3  
4 Feldbæk Nielsen, Prof. Søren Dinesen Østergaard, and Prof. John Rosendahl Østergaard for providing great  
5  
6 clinical expertise concerning our codebook. Also, we are grateful of the contributions of Anne Staub  
7  
8 Rasmussen to the first version of the codebook. Thanks to Prof. John McGrath for input on the project and  
9  
10 inspiration to visual presentation of the data. Finally, a huge thanks to Helle Vester for great project  
11  
12 management and for neat proofreading of the manuscript.  
13  
14

## 15 **CONTRIBUTIONS**

16  
17  
18 CFC and HTS contributed to the study conception. CFC, HTS, NS, JO, SS, TBR, and SVV designed the study  
19  
20 and wrote a statistical analyses plan. NS, JO, and SS outlined the economic methods, and SS and JO  
21  
22 performed the data management and analyses of the economic data. TBR performed the remaining data  
23  
24 management and analyses, and performed all final analyses. All authors interpreted the results, and TBR,  
25  
26 SVV, and CFC visualized the data. SVV drafted the first manuscript, and all authors revised the manuscript  
27  
28 and approved the final version. All authors agree to be accountable for all aspects of the work.  
29  
30  
31

## 32 **COMPETING INTERESTS**

33  
34 The authors have no specific competing interests to declare.  
35  
36

## 37 **FUNDING**

38  
39 This work was supported by a grant from Lundbeckfonden (grant no. R248-2017-521).  
40  
41

## 42 **ETHICAL APPROVAL**

43  
44 Not required.  
45  
46

## 47 **DATA SHARING**

48  
49 Data are available as presented in the paper and in the Supporting Information files. According to Danish  
50  
51 legislation, our approvals to use the Danish data sources for the current study do not allow us to distribute  
52  
53 or make patient data directly available to other parties. Data access and information about availability is  
54  
55 accessible through Statistics Denmark (website: <https://www.dst.dk/en/TilSalg/Forskningservice>, e-mail:  
56  
57 [dst@dst.dk](mailto:dst@dst.dk)).  
58  
59  
60

## Figure Legends

**Figure 1. Characteristics of patients with prevalent brain disorders in Denmark in 2015 sorted from highest to lowest prevalence (the white line in the age distribution represents the median age in each cohort).**

Abbreviations: CNS, central nervous system; CCI, Charlson Comorbidity Index

**Figure 2. Occurrence of brain disorders in the Danish population sorted from highest to lowest incidence, including incidence during 2011-2015 and prevalence in 2015.**

Abbreviations: CNS, central nervous system

**Figure 3. One-year mortality in patients with incident brain disorders in Denmark during 2011-2015 compared with the general population (comparison group). Hazard ratios are adjusted for age, sex, and comorbidity score. Specific disorders are sorted by hazard ratios.**

Abbreviations: CI, confidence interval; CNS, central nervous system

**Figure 4. Total attributable direct costs in persons with prevalent brain disorders in Denmark in 2015 (in 2015 prices) sorted from highest to lowest costs.**

Abbreviations: CNS, central nervous system

**Figure 5. Attributable direct costs per person in individuals with prevalent brain disorders in Denmark in 2015 (in 2015 prices) sorted from highest to lowest costs.**

Abbreviations: CNS, central nervous system

**Figure 6. Total attributable indirect costs due to lost productivity in persons with prevalent brain disorders in Denmark in 2015 (in 2015 prices) sorted from highest to lowest costs.**

Abbreviations: CNS, central nervous system

## References

1. GBD 2015 Neurological Disorders Collaborator Group. Global, regional, and national burden of neurological disorders during 1990–2015: a systematic analysis for the Global Burden of Disease Study 2015. *The Lancet Neurology* 2017;16(11):877-97. doi: [https://doi.org/10.1016/S1474-4422\(17\)30299-5](https://doi.org/10.1016/S1474-4422(17)30299-5)
2. Whiteford HA, Ferrari AJ, Degenhardt L, et al. The global burden of mental, neurological and substance use disorders: an analysis from the Global Burden of Disease Study 2010. *PLoS One* 2015;10(2):e0116820. doi: 10.1371/journal.pone.0116820
3. Gustavsson A, Svensson M, Jacobi F, et al. Cost of disorders of the brain in Europe 2010. *Eur Neuropsychopharmacol* 2011;21(10):718-79. doi: 10.1016/j.euroneuro.2011.08.008
4. Olesen J, Gustavsson A, Svensson M, et al. The economic cost of brain disorders in Europe. *Eur J Neurol* 2012;19(1):155-62. doi: 10.1111/j.1468-1331.2011.03590.x
5. OECD EU. Health at a Glance: Europe 2018: State of Health in the EU Cycle. Paris/European Union, Brussels.2018:212. doi: [https://doi.org/10.1787/health\\_glance\\_eur-2018-en](https://doi.org/10.1787/health_glance_eur-2018-en)
6. Bloom DE, Cafiero, E.T., Jané-Llopis, E., Abrahams-Gessel, S., Bloom, L.R., Fathima, S., Feigl, A.B., Gaziano, T., Mowafi, M., Pandya, A., Prettner, K., Rosenberg, L., Seligman, B., Stein, A., & Weinstein, C. The Global Economic Burden of Non-communicable Diseases. Geneva: World Economic Forum, 2011. Available from: <http://apps.who.int/medicinedocs/documents/s18806en/s18806en.pdf> accessed 12 Dec 2019.
7. Trautmann S, Rehm J, Wittchen HU. The economic costs of mental disorders: Do our societies react appropriately to the burden of mental disorders? *EMBO Rep* 2016;17(9):1245-9. doi: 10.15252/embr.201642951
8. Sørensen HT. Global burden of neurological disorders: challenges and opportunities with the available data. *The Lancet Neurology* 2019;18(5):420-21. doi: 10.1016/S1474-4422(19)30027-4
9. Vigo D, Thornicroft G, Atun R. Estimating the true global burden of mental illness. *Lancet Psychiatry* 2016;3(2):171-8. doi: 10.1016/s2215-0366(15)00505-2
10. Schmidt M, Schmidt SAJ, Adelborg K, et al. The Danish health care system and epidemiological research: from health care contacts to database records. *Clin Epidemiol* 2019;11:563-91. doi: 10.2147/clep.S179083
11. Heide-Jørgensen U, Adelborg K, Kahlert J, et al. Sampling strategies for selecting general population comparison cohorts. *Clin Epidemiol* 2018;10:1325-37. doi: 10.2147/clep.S164456
12. Schmidt M, Schmidt SA, Sandegaard JL, et al. The Danish National Patient Registry: a review of content, data quality, and research potential. *Clinical epidemiology* 2015;7:449-90. doi: 10.2147/CLEP.S91125 [doi]
13. Andersen JS, Olivarius Nde F, Krasnik A. The Danish National Health Service Register. *Scand J Public Health* 2011;39(7 Suppl):34-7. doi: 10.1177/1403494810394718

1  
2  
3  
4  
5  
6  
7  
8  
9  
10  
11  
12  
13  
14  
15  
16  
17  
18  
19  
20  
21  
22  
23  
24  
25  
26  
27  
28  
29  
30  
31  
32  
33  
34  
35  
36  
37  
38  
39  
40  
41  
42  
43  
44  
45  
46  
47  
48  
49  
50  
51  
52  
53  
54  
55  
56  
57  
58  
59  
60

14. Pottegard A, Schmidt SAJ, Wallach-Kildemoes H, et al. Data Resource Profile: The Danish National Prescription Registry. *Int J Epidemiol* 2017;46(3):798-98f. doi: 10.1093/ije/dyw213
15. Statistics Denmark. Documentation of statistics [cited 2019 12/12]. Available from: <https://www.dst.dk/en/Statistik/dokumentation/documentationofstatistics> accessed 12 Dec 2019.
16. Ankjaer-Jensen A, Rosling P, Bilde L. Variable prospective financing in the Danish hospital sector and the development of a Danish case-mix system. *Health care management science* 2006;9(3):259-68.
17. Charlson ME, Pompei P, Ales KL, et al. A new method of classifying prognostic comorbidity in longitudinal studies: development and validation. *J Chronic Dis* 1987;40(5):373-83.
18. Thygesen SK, Christiansen CF, Christensen S, et al. The predictive value of ICD-10 diagnostic coding used to assess Charlson comorbidity index conditions in the population-based Danish National Registry of Patients. *BMC Med Res Methodol* 2011;11:83. doi: 10.1186/1471-2288-11-83
19. Drummond M, Sculpher MJ, Claxton K, Stoddart GL, Torrance GW. Methods for the economic evaluation of health care programmes. 3. ed. ed. Oxford: Oxford University Press 2005.
20. Drummond MF, McGuire A. Economic evaluation in health care : merging theory with practice. New York: Oxford University Press 2001.
21. Wickham H, Averick M, Bryan J, et al. Welcome to the Tidyverse. *Journal of Open Source Software* 2019;4(43):1686. doi: 10.21105/joss.01686
22. Alonso J, Angermeyer MC, Bernert S, et al. Prevalence of mental disorders in Europe: results from the European Study of the Epidemiology of Mental Disorders (ESEMeD) project. *Acta Psychiatr Scand Suppl* 2004(420):21-7. doi: 10.1111/j.1600-0047.2004.00327.x
23. Stovner L, Andrée C. Prevalence of headache in Europe: A review for the Eurolight project. *The journal of headache and pain* 2010;11:289-99. doi: 10.1007/s10194-010-0217-0
24. Kerkhof GA. Epidemiology of sleep and sleep disorders in The Netherlands. *Sleep Med* 2017;30:229-39. doi: 10.1016/j.sleep.2016.09.015
25. Schneeweiss S, Seeger JD, Maclure M, et al. Performance of Comorbidity Scores to Control for Confounding in Epidemiologic Studies using Claims Data. *American Journal of Epidemiology* 2001;154(9):854-64. doi: 10.1093/aje/154.9.854
26. Frahm-Falkenberg S, Ibsen R, Kjellberg J, et al. Health, social and economic consequences of dementias: a comparative national cohort study. *European journal of neurology* 2016;23(9):1400-07. doi: 10.1111/ene.13043
27. Schaller S, Mauskopf J, Kriza C, et al. The main cost drivers in dementia: a systematic review. *Int J Geriatr Psychiatry* 2015;30(2):111-29. doi: 10.1002/gps.4198
28. Cantarero-Prieto D, Leon PL, Blazquez-Fernandez C, et al. The economic cost of dementia: A systematic review. *Dementia (London)* 2019:1471301219837776. doi: 10.1177/1471301219837776

- 1  
2  
3  
4 29. Plana-Ripoll O, Pedersen CB, Holtz Y, et al. Exploring Comorbidity Within Mental Disorders Among a  
5 Danish National Population. *JAMA Psychiatry* 2019;76(3):259-70. doi:  
6 10.1001/jamapsychiatry.2018.3658  
7
- 8  
9 30. Barnett K, Mercer SW, Norbury M, et al. Epidemiology of multimorbidity and implications for health  
10 care, research, and medical education: a cross-sectional study. *Lancet* 2012;380(9836):37-43. doi:  
11 10.1016/S0140-6736(12)60240-2  
12
- 13  
14 31. Lawrence D, Hancock KJ, Kisely S. The gap in life expectancy from preventable physical illness in  
15 psychiatric patients in Western Australia: retrospective analysis of population based registers. *BMJ :  
16 British Medical Journal* 2013;346:f2539. doi: 10.1136/bmj.f2539  
17
- 18  
19 32. Plana-Ripoll O, Pedersen CB, Agerbo E, et al. A comprehensive analysis of mortality-related health  
20 metrics associated with mental disorders: a nationwide, register-based cohort study. *The Lancet*  
21 2019 doi: 10.1016/S0140-6736(19)32316-5  
22
- 23  
24 33. Statistics Denmark. Annual national accounts [cited 2019 12/12]. Available from:  
25 [https://www.dst.dk/en/Statistik/emner/nationalregnskab-og-offentlige-finanser/aarligt-  
26 nationalregnskab](https://www.dst.dk/en/Statistik/emner/nationalregnskab-og-offentlige-finanser/aarligt-nationalregnskab) accessed 12 Dec 2019.  
27
- 28  
29 34. Jennum P, Iversen HK, Ibsen R, et al. Cost of stroke: a controlled national study evaluating societal  
30 effects on patients and their partners. *BMC Health Serv Res* 2015;15:466-66. doi: 10.1186/s12913-  
31 015-1100-0  
32
- 33  
34 35. Jennum P, Zoetmulder M, Korbo L, et al. The health-related, social, and economic consequences of  
35 parkinsonism: a controlled national study. *J Neurol* 2011;258(8):1497-506. doi: 10.1007/s00415-  
36 011-5969-1  
37
- 38  
39 36. Jennum P, Sabers A, Christensen J, et al. Welfare consequences for people with epilepsy and their  
40 partners: A matched nationwide study in Denmark. *Seizure* 2017;49:17-24. doi:  
41 10.1016/j.seizure.2017.05.007  
42
- 43  
44 37. Arango C, Díaz-Caneja CM, McGorry PD, et al. Preventive strategies for mental health. *The Lancet  
45 Psychiatry* 2018;5(7):591-604. doi: 10.1016/S2215-0366(18)30057-9  
46
- 47  
48 38. Rudd AG, Wolfe CDA, Howard RS. Prevention of neurological disease in later life. *Journal of Neurology,  
49 Neurosurgery & Psychiatry* 1997;63(suppl 1):S39-S52. doi: 10.1136/jnnp.63.2008.39S  
50  
51  
52  
53  
54  
55  
56  
57  
58  
59  
60



For peer review only - <http://bmjopen.bmj.com/site/about/guidelines.xhtml>

Sex Male Female

Age

CCI 0 1-2 +3



1  
2  
3  
4  
5  
6  
7  
8  
9  
10  
11  
12  
13  
14  
15  
16  
17  
18  
19  
20  
21  
22  
23  
24  
25  
26  
27  
28  
29  
30  
31  
32  
33  
34  
35  
36  
37  
38  
39  
40  
41  
42  
43  
44  
45  
46  
47





BMJ Open





For peer review only - <http://bmjopen.bmj.com/site/about/guidelines.xhtml>

■ Nursing home / sheltered accomodation    
 ■ Home care    
 ■ Filled prescriptions  
■ Secondary sector - Inpatient    
 ■ Secondary sector - Outpatient    
 ■ Primary sector

1  
2  
3  
4  
5  
6  
7  
8  
9  
10  
11  
12  
13  
14  
15  
16  
17  
18  
19  
20  
21  
22  
23  
24  
25  
26  
27  
28  
29  
30  
31  
32  
33  
34  
35  
36  
37  
38  
39  
40  
41  
42  
43  
44

Depression  
Alcohol abuse  
Schizophrenia spectrum disorders  
Personality disorders  
Anxiety disorders  
Drug abuse  
Traumatic brain injury  
Developmental and behavioural disorders  
Epilepsy  
Stroke  
Intellectual disability  
Headache  
Bipolar disorder  
Sleep disorders  
Polyneuropathy  
Multiple sclerosis  
Cerebral palsy  
Dementia  
Brain tumours  
Eating disorders  
Neuromuscular disorders  
Infections of the CNS  
Other neurodegenerative disorders  
Parkinson's disease

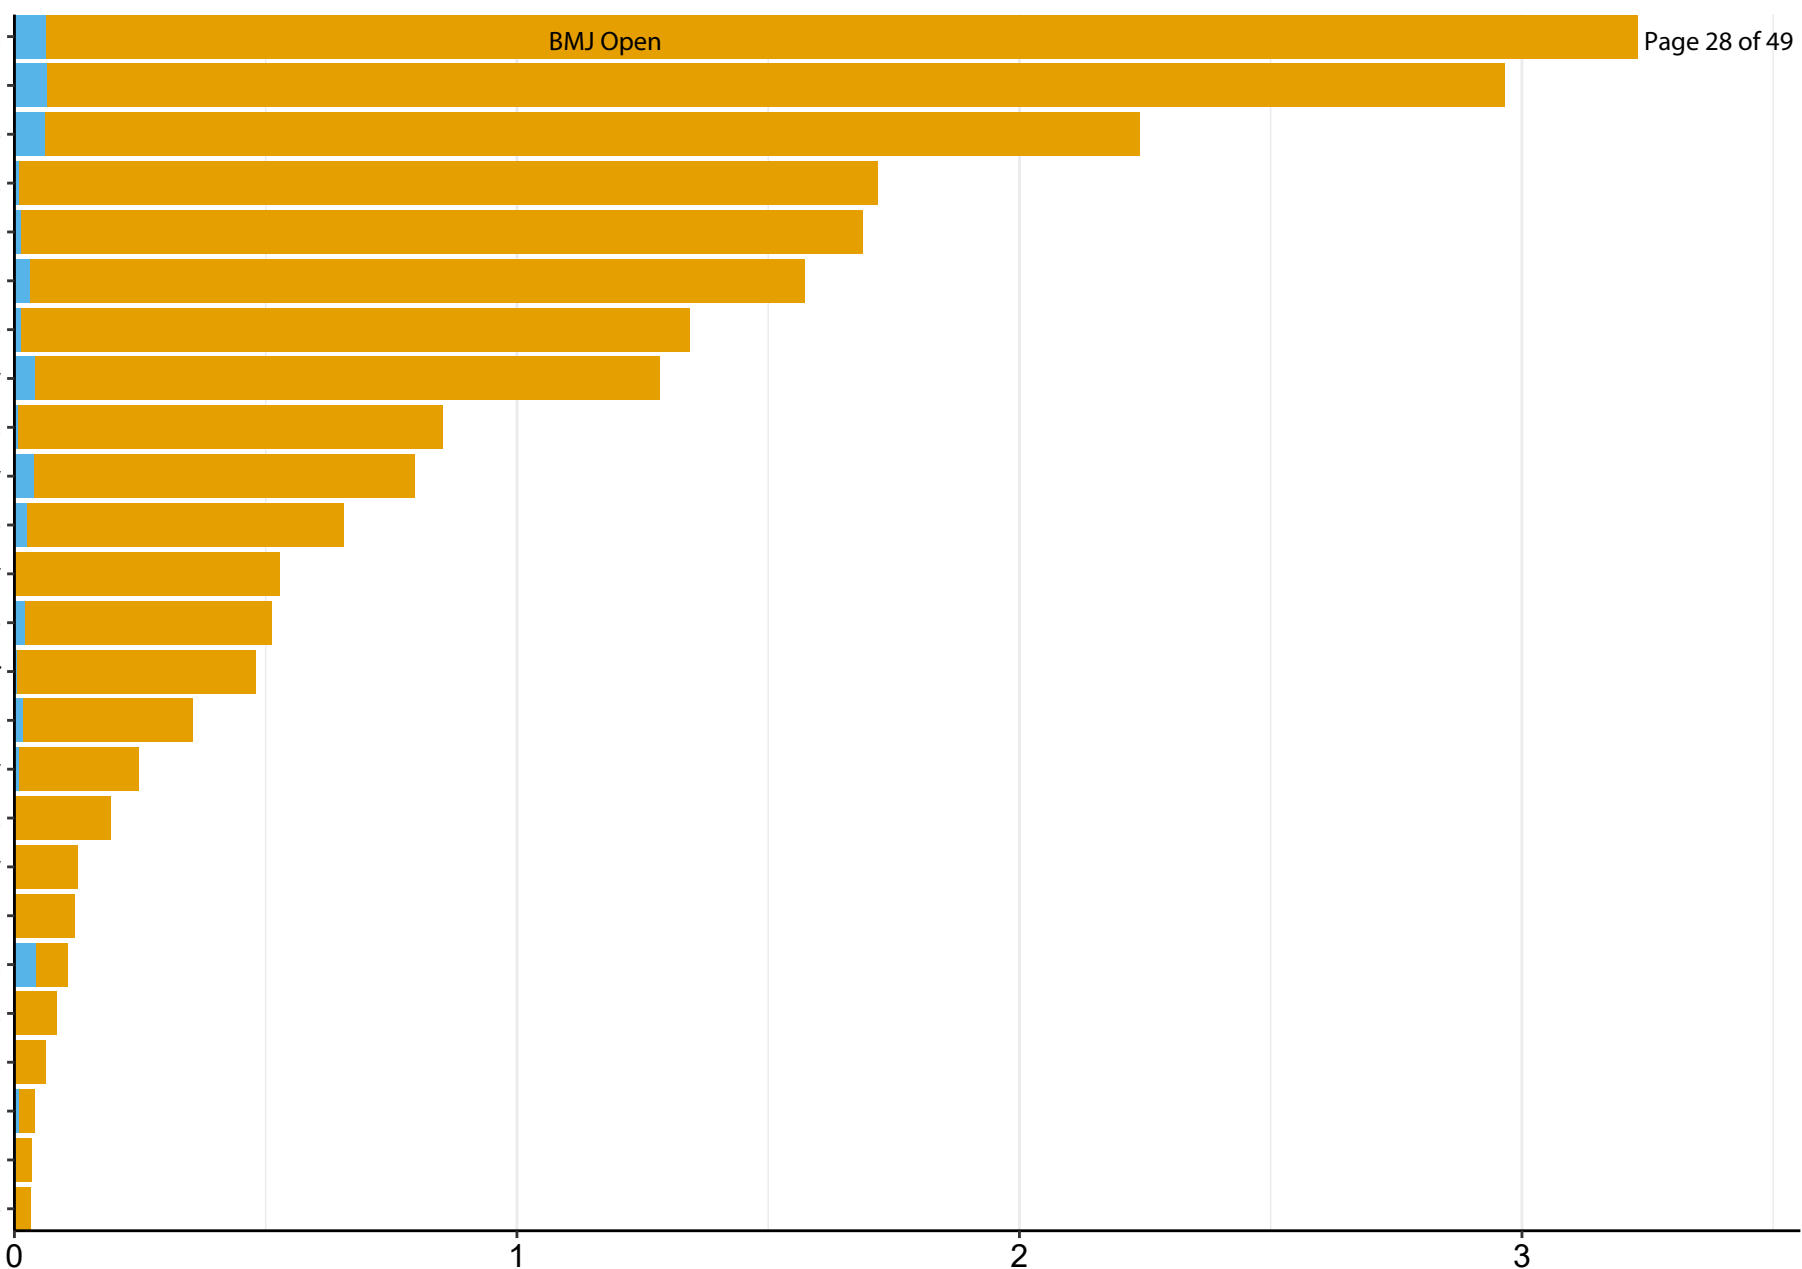

Lost productivity in billion EUR

■ Lost productivity due to premature death  
■ Lost productivity associated with illness

## APPENDIX 1 – DATA SOURCES

From the Danish Civil Registration System (DCRS), we obtained personal identification numbers (*i.e.*, CPR-numbers, a unique 10-digit number for every Danish citizen given at birth or immigration) to identify individuals across the nationwide registries in both the healthcare and socioeconomic systems. Also, the DCRS holds information on date of birth, sex, vital status, and place of living, of every person in Denmark.<sup>1</sup>

The Danish National Patient Registry (DNPR) holds information on all in- and outpatient hospital contacts since 1995, with details about date of admission and discharge, procedures and operations, and one or more discharge diagnoses.<sup>2</sup> Similarly, all contacts to psychiatric hospitals are recorded in the Danish Psychiatric Central Research Registry, which since 1995 has been included in the DNPR. The discharge diagnoses are recorded using the International Classification of Diseases, Tenth Revision (ICD-10).<sup>3</sup> For every hospital contact, the accumulated costs of the services provided are reimbursed to the hospital department using national reimbursement rates/tariffs based on average costs of the services. Diagnosis-related group (DRG) tariffs are used for inpatient contacts and Danish Ambulatory Grouping System (DAGS) tariffs for outpatient contacts.<sup>4</sup>

The Danish Health Service Registry (DHSR) contains information on services provided by health contractors in primary health care covered by the national health services during consultations, telephone consultations, and home visits. Services are recorded from a wide range of health contractors such as general practitioners, dentists, physiotherapists, chiropodists, chiropractors, psychologists, and other specialists. Every service recorded in the DHSR is accompanied with a corresponding tariff used when the counties reimburse services to the health contractor.<sup>5</sup>

The Danish National Prescription Registry includes nationwide data on all prescriptions filled at outpatient pharmacies since 1995, *e.g.*, drug type, number of packages, package size, and price. Since 2004, indication of prescriptions are recorded, but with missing indication in one third of prescriptions filled. Drug types are classified according to the Anatomical Therapeutic Chemical (ATC) classification system.<sup>6</sup>

1  
2  
3  
4 Finally, Statistics Denmark hosts registries with information on every Danish resident on whether the  
5  
6 person lives in an elderly home or nursery home, on exact time spent by public home help in private  
7  
8 households (in hours), and on personal income before taxes.<sup>7</sup> Data on rehabilitation provided by  
9  
10 municipalities were not available in any nationwide registry and therefore not included in our analyses.  
11  
12  
13  
14  
15  
16  
17  
18  
19  
20  
21  
22  
23  
24  
25  
26  
27  
28  
29  
30  
31  
32  
33  
34  
35  
36  
37  
38  
39  
40  
41  
42  
43  
44  
45  
46  
47  
48  
49  
50  
51  
52  
53  
54  
55  
56  
57  
58  
59  
60

For peer review only

## APPENDIX 2 – CODE BOOKS

### ICD-10 and ATC codes

In the main analyses, brain disorders were defined by the “Included diagnosis codes” excluding the codes in “Excluded diagnosis codes”. In the sensitivity analyses, brain disorders were defined by either “Included diagnosis codes” excluding the codes in “Excluded diagnosis codes” or by filled prescriptions including “Included ATC codes”. For The Anatomical Therapeutic Chemical (ATC) codes, if any indication codes are given, only prescriptions with those ATC and indication codes were used. Diagnosis codes are given as International Classification of Diseases, Tenth Revision (ICD-10) codes. For both ICD-10 and ATC codes, all subcodes were included.

| Brain disorder                           | Included diagnosis codes                                                                                   | Excluded diagnosis codes | Included ATC codes               | Included indication codes |
|------------------------------------------|------------------------------------------------------------------------------------------------------------|--------------------------|----------------------------------|---------------------------|
| Any brain disorder                       |                                                                                                            |                          |                                  |                           |
| Alcohol abuse                            | F10 E244 G312 G621 G721 I426 K292 K70 K852 K860 Q860                                                       | F100                     | V03AA<br>N07BB                   |                           |
| Anxiety disorders                        | F40 F41 F42                                                                                                |                          | N06A                             | 371 830 163               |
| Bipolar disorder                         | F30 F31                                                                                                    |                          | N05AN01                          |                           |
| Brain tumours                            | C70 C71 C72 D32 D33 D42 D43                                                                                |                          |                                  |                           |
| Cerebral palsy                           | G80                                                                                                        |                          |                                  |                           |
| Dementia                                 | F00 F01 F02 F03 G30 G310B G311 G318 G319                                                                   |                          | N06D                             | 330 331 329 838           |
| Depression                               | F32 F33                                                                                                    |                          | N06A                             | 168 270                   |
| Developmental and behavioural disorders  | F84 F9                                                                                                     | F99                      |                                  |                           |
| Drug abuse                               | F1                                                                                                         | F10 F17                  | N07BC01<br>N07BC51               |                           |
| Eating disorders                         | F500 F501 F502 F503                                                                                        |                          |                                  |                           |
| Epilepsy                                 | G40                                                                                                        |                          |                                  |                           |
| Headache                                 | G43 G44                                                                                                    |                          | N02C                             | 56 269 153                |
| Infections of the central nervous system | G0 A17 A321 A327 A390 A521 A522 A523 A692 A83 A84 A85 A87 A89 B003 B004 B010 B011 B020 B021 B582 B451 B375 | G08 G09                  |                                  |                           |
| Intellectual disability                  | F7 Q90 Q992                                                                                                |                          |                                  |                           |
| Multiple sclerosis                       | G35                                                                                                        |                          |                                  |                           |
| Neuromuscular disorders                  | G70 G71 G72 G73                                                                                            |                          |                                  |                           |
| Other neurodegenerative disorders        | G10 G11 G122G G13 G14                                                                                      | G130 G139                |                                  |                           |
| Parkinson’s disease                      | G20 G23                                                                                                    |                          | N04BA<br>N04BB<br>N04BD<br>N04BX |                           |
| Personality disorders                    | F60                                                                                                        |                          |                                  |                           |
| Polyneuropathy                           | G60 G61 G62 G63 G64 G130                                                                                   |                          |                                  |                           |
| Schizophrenia spectrum disorders         | F2                                                                                                         |                          |                                  |                           |
| Sleep disorders                          | F51 G470 G471 G473 G474                                                                                    |                          | N05CF01<br>N05CH01               | 372 165 166 373<br>170    |
| Stress-related disorders                 | F43                                                                                                        |                          |                                  |                           |
| Stroke                                   | I60 I61 I63 I64                                                                                            | I608                     |                                  |                           |
| Traumatic brain injury                   | S020 S021 S027 S029 S06                                                                                    |                          |                                  |                           |

### Charlson Comorbidity Index (CCI)

The codes included were used to identify comorbidity in persons with brain disorders and their comparisons. Persons were considered having the specific type of comorbidity when having at least one of the listed discharge diagnosis codes (including all subcodes) recorded in the Danish National Patient Registry up to 10 years before index date.

| CCI disease                       | Included ICD-8 and ICD-10 diagnosis codes                                                                                                                       |
|-----------------------------------|-----------------------------------------------------------------------------------------------------------------------------------------------------------------|
| Myocardial infarction             | 410 DI21 DI22 DI23                                                                                                                                              |
| Congestive heart failure          | 42709 42710 42711 42719 42899 78249 DI50 DI110 DI130 DI132                                                                                                      |
| Peripheral vascular disease       | 440 441 442 443 444 445 DI70 DI71 DI72 DI73 DI74 DI77                                                                                                           |
| Cerebrovascular disease           | 430 431 432 433 434 435 436 437 438 DI6 DG45 DG46                                                                                                               |
| Dementia                          | 29009 2901 29309 DF00 DF01 DF02 DF03 DF051 DG30                                                                                                                 |
| Chronic pulmonary disease         | 490 491 492 493 515 516 517 518 DJ40 DJ41 DJ42 DJ43 DJ44 DJ45 DJ46 DJ47 DJ60 DJ61 DJ62 DJ63 DJ64 DJ65 DJ66 DJ67 DJ684 DJ701 DJ703 DJ841 DJ920 DJ961 DJ982 DJ983 |
| Connective tissue disease         | 712 716 734 446 13599 DM05 DM06 DM08 DM09 DM30 DM31 DM32 DM33 DM34 DM35 DM36 DD86                                                                               |
| Ulcer disease                     | 53091 53098 531 532 533 534 DK221 DK25 DK26 DK27 DK28                                                                                                           |
| Mild liver disease                | 571 57301 57304 DB18 DK700 DK701 DK702 DK703 DK709 DK71 DK73 DK74 DK760                                                                                         |
| Diabetes without end-organ damage | 24900 24906 24907 24909 25000 25006 25007 25009 DE100 DE101 DE109 DE110 DE111 DE119                                                                             |
| Hemiplegia                        | 344 DG81 DG82                                                                                                                                                   |
| Moderate to severe renal disease  | 403 404 580 581 582 583 584 59009 59319 7531 792 DI12 DI13 DN00 DN01 DN02 DN03 DN04 DN05 DN07 DN11 DN14 DN17 DN18 DN19 DQ61                                     |
| Diabetes with end-organ damage    | 24901 24902 24903 24904 24905 24908 25001 25002 25003 25004 25005 25008 DE102 DE103 DE104 DE105 DE106 DE107 DE108 DE112 DE113 DE114 DE115 DE116 DE117 DE118     |
| Solid cancer tumour               | 14 15 16 17 18 190 191 192 193 194 DC0 DC1 DC2 DC3 DC4 DC5 DC6 DC70 DC71 DC72 DC73 DC74 DC75                                                                    |
| Leukaemia                         | 204 205 206 207 DC91 DC92 DC93 DC94 DC95                                                                                                                        |
| Lymphoma                          | 200 201 202 203 27559 DC81 DC82 DC83 DC84 DC85 DC88 DC90 DC96                                                                                                   |
| Moderate to severe liver disease  | 07000 07002 07004 07006 07008 57300 4560 DB150 DB160 DB162 DB190 DK704 DK72 DK766 DI85                                                                          |
| Metastatic solid tumour           | 195 196 197 198 199 DC76 DC77 DC78 DC79 DC80                                                                                                                    |
| AIDS                              | 07983 DB21 DB22 DB23 DB24                                                                                                                                       |

## Supplementary tables

Suppl. Table 1. Characteristics of patients with prevalent disorders in Denmark in 2015 sorted in alphabetical order.

| Disease group                            | Prevalent cohorts: 2015 |                |                     |                |                 |                |
|------------------------------------------|-------------------------|----------------|---------------------|----------------|-----------------|----------------|
|                                          | Persons, N              | Men, N (%)     | Age, median (Q1-Q3) | CCI: 0, N (%)  | CCI: 1-2, N (%) | CCI: +3, N (%) |
| Any brain disorder                       | 1,075,081               | 536,462 (49.9) | 46.0 (27.5-63.6)    | 788,948 (73.4) | 222,453 (20.7)  | 63,680 (5.9)   |
| Alcohol abuse                            | 101,066                 | 67,376 (66.7)  | 56.5 (46.2-65.8)    | 59,961 (59.3)  | 28,397 (28.1)   | 12,708 (12.6)  |
| Anxiety disorders                        | 96,943                  | 33,768 (34.8)  | 41.2 (28.8-54.3)    | 78,009 (80.5)  | 15,181 (15.7)   | 3,753 (3.9)    |
| Bipolar disorder                         | 23,364                  | 9,366 (40.1)   | 52.4 (39.3-64.9)    | 17,127 (73.3)  | 4,851 (20.8)    | 1,386 (5.9)    |
| Brain tumours                            | 14,953                  | 6,101 (40.8)   | 62.6 (48.6-71.9)    | 8,718 (58.3)   | 4,339 (29.0)    | 1,896 (12.7)   |
| Cerebral palsy                           | 9,083                   | 5,093 (56.1)   | 22.3 (14.1-37.0)    | 6,516 (71.7)   | 2,092 (23.0)    | 475 (5.2)      |
| Dementia                                 | 40,037                  | 15,645 (39.1)  | 81.7 (73.9-87.5)    | 8,340 (20.8)   | 22,655 (56.6)   | 9,042 (22.6)   |
| Depression                               | 180,886                 | 64,191 (35.5)  | 49.0 (35.6-64.1)    | 130,862 (72.3) | 38,342 (21.2)   | 11,682 (6.5)   |
| Developmental and behavioural disorders  | 103,157                 | 68,589 (66.5)  | 19.6 (14.2-26.0)    | 94,745 (91.8)  | 7,841 (7.6)     | 571 (0.6)      |
| Drug abuse                               | 50,066                  | 32,295 (64.5)  | 38.6 (28.4-50.8)    | 38,657 (77.2)  | 9,180 (18.3)    | 2,229 (4.5)    |
| Eating disorders                         | 15,936                  | 750 (4.7)      | 29.5 (23.0-36.9)    | 14,484 (90.9)  | 1,332 (8.4)     | 120 (0.8)      |
| Epilepsy                                 | 72,205                  | 37,047 (51.3)  | 43.5 (24.8-62.1)    | 51,701 (71.6)  | 15,562 (21.6)   | 4,942 (6.8)    |
| Headache                                 | 96,252                  | 32,218 (33.5)  | 45.4 (31.2-57.6)    | 75,439 (78.4)  | 17,566 (18.3)   | 3,247 (3.4)    |
| Infections of the central nervous system | 26,829                  | 14,069 (52.4)  | 43.1 (22.9-61.5)    | 20,740 (77.3)  | 4,709 (17.6)    | 1,380 (5.1)    |
| Intellectual disability                  | 27,605                  | 16,087 (58.3)  | 25.4 (17.1-45.1)    | 23,577 (85.4)  | 3,501 (12.7)    | 527 (1.9)      |
| Multiple sclerosis                       | 14,264                  | 4,431 (31.1)   | 52.6 (42.9-62.7)    | 11,206 (78.6)  | 2,559 (17.9)    | 499 (3.5)      |
| Neuromuscular disorders                  | 7,080                   | 3,649 (51.5)   | 51.4 (33.3-66.5)    | 4,427 (62.5)   | 1,992 (28.1)    | 661 (9.3)      |
| Other neurodegenerative disorders        | 2,192                   | 1,143 (52.1)   | 59.9 (46.2-70.5)    | 1,381 (63.0)   | 622 (28.4)      | 189 (8.6)      |
| Parkinson's disease                      | 8,942                   | 5,083 (56.8)   | 75.3 (68.4-81.4)    | 4,430 (49.5)   | 3,323 (37.2)    | 1,189 (13.3)   |
| Personality disorders                    | 71,334                  | 24,517 (34.4)  | 39.9 (30.6-51.0)    | 58,516 (82.0)  | 10,824 (15.2)   | 1,994 (2.8)    |
| Polyneuropathy                           | 32,710                  | 18,918 (57.8)  | 66.7 (55.0-75.8)    | 15,900 (48.6)  | 11,139 (34.1)   | 5,671 (17.3)   |
| Schizophrenia spectrum disorders         | 61,346                  | 32,637 (53.2)  | 45.1 (32.1-57.7)    | 48,640 (79.3)  | 10,276 (16.8)   | 2,430 (4.0)    |
| Sleep disorders                          | 61,666                  | 45,042 (73.0)  | 55.9 (43.0-66.2)    | 41,909 (68.0)  | 15,223 (24.7)   | 4,534 (7.4)    |
| Stress-related disorders                 | 196,291                 | 77,494 (39.5)  | 42.3 (29.3-54.1)    | 158,789 (80.9) | 31,138 (15.9)   | 6,364 (3.2)    |
| Stroke                                   | 120,065                 | 64,067 (53.4)  | 71.0 (61.1-79.9)    | 23,651 (19.7)  | 70,389 (58.6)   | 26,025 (21.7)  |
| Traumatic brain injury                   | 249,348                 | 142,776 (57.3) | 34.9 (22.1-53.4)    | 207,314 (83.1) | 34,162 (13.7)   | 7,872 (3.2)    |

Abbreviations: Q, quartile; CCI, Charlson Comorbidity Index.



**Suppl. Table 2. Characteristics of patients with incident brain disorders in Denmark during 2011-2015 sorted in alphabetical order.**

| Disease group                            | Incident cohorts: 2011-2015 |                |                     |                |                 |                |
|------------------------------------------|-----------------------------|----------------|---------------------|----------------|-----------------|----------------|
|                                          | Persons, N                  | Men, N (%)     | Age, median (Q1-Q3) | CCI: 0, N (%)  | CCI: 1-2, N (%) | CCI: +3, N (%) |
| Any brain disorder                       | 381,759                     | 187,780 (49.2) | 46.6 (21.5-68.9)    | 295,560 (77.4) | 64,746 (17.0)   | 21,453 (5.6)   |
| Alcohol abuse                            | 37,032                      | 25,251 (68.2)  | 55.8 (42.7-66.8)    | 25,797 (69.7)  | 8,347 (22.5)    | 2,888 (7.8)    |
| Anxiety disorders                        | 53,350                      | 20,013 (37.5)  | 35.8 (22.3-56.5)    | 39,034 (73.2)  | 8,480 (15.9)    | 5,836 (10.9)   |
| Bipolar disorder                         | 9,838                       | 4,074 (41.4)   | 40.8 (28.5-55.0)    | 7,951 (80.8)   | 1,500 (15.2)    | 387 (3.9)      |
| Brain tumours                            | 9,336                       | 4,199 (45.0)   | 64.1 (50.7-72.9)    | 6,044 (64.7)   | 2,227 (23.9)    | 1,065 (11.4)   |
| Cerebral palsy                           | 2,145                       | 1,199 (55.9)   | 13.7 (3.1-54.3)     | 1,371 (63.9)   | 582 (27.1)      | 192 (9.0)      |
| Dementia                                 | 42,798                      | 17,454 (40.8)  | 81.8 (75.4-87.0)    | 21,015 (49.1)  | 15,686 (36.7)   | 6,097 (14.2)   |
| Depression                               | 78,926                      | 29,379 (37.2)  | 45.4 (27.9-66.8)    | 56,768 (71.9)  | 15,445 (19.6)   | 6,713 (8.5)    |
| Developmental and behavioural disorders  | 48,562                      | 29,864 (61.5)  | 14.1 (8.6-21.9)     | 43,747 (90.1)  | 4,445 (9.2)     | 370 (0.8)      |
| Drug abuse                               | 18,843                      | 12,469 (66.2)  | 26.9 (20.7-42.3)    | 15,944 (84.6)  | 2,322 (12.3)    | 577 (3.1)      |
| Eating disorders                         | 6,011                       | 321 (5.3)      | 19.7 (16.0-24.9)    | 5,683 (94.5)   | 307 (5.1)       | 21 (0.3)       |
| Epilepsy                                 | 21,255                      | 11,301 (53.2)  | 53.2 (21.1-70.6)    | 12,057 (56.7)  | 6,319 (29.7)    | 2,879 (13.5)   |
| Headache                                 | 35,180                      | 11,547 (32.8)  | 37.6 (23.4-50.4)    | 29,066 (82.6)  | 5,292 (15.0)    | 822 (2.3)      |
| Infections of the central nervous system | 9,501                       | 4,922 (51.8)   | 44.6 (21.9-64.2)    | 7,086 (74.6)   | 1,727 (18.2)    | 688 (7.2)      |
| Intellectual disability                  | 8,166                       | 4,692 (57.5)   | 17.3 (9.9-34.8)     | 7,035 (86.1)   | 994 (12.2)      | 137 (1.7)      |
| Multiple sclerosis                       | 3,345                       | 1,070 (32.0)   | 41.7 (31.9-52.0)    | 2,833 (84.7)   | 449 (13.4)      | 63 (1.9)       |
| Neuromuscular disorders                  | 3,062                       | 1,596 (52.1)   | 52.8 (32.9-67.8)    | 1,950 (63.7)   | 803 (26.2)      | 309 (10.1)     |
| Other neurodegenerative disorders        | 1,464                       | 777 (53.1)     | 65.3 (53.1-73.2)    | 904 (61.7)     | 425 (29.0)      | 135 (9.2)      |
| Parkinson's disease                      | 6,478                       | 3,883 (59.9)   | 75.5 (68.9-81.4)    | 3,459 (53.4)   | 2,236 (34.5)    | 783 (12.1)     |
| Personality disorders                    | 21,556                      | 6,762 (31.4)   | 27.2 (21.3-38.6)    | 19,265 (89.4)  | 2,030 (9.4)     | 261 (1.2)      |
| Polyneuropathy                           | 17,925                      | 10,755 (60.0)  | 65.9 (54.5-75.0)    | 8,825 (49.2)   | 6,108 (34.1)    | 2,992 (16.7)   |
| Schizophrenia spectrum disorders         | 19,316                      | 10,219 (52.9)  | 29.7 (21.1-48.9)    | 16,209 (83.9)  | 2,483 (12.9)    | 624 (3.2)      |
| Sleep disorders                          | 31,316                      | 21,769 (69.5)  | 51.9 (38.5-62.7)    | 21,974 (70.2)  | 7,086 (22.6)    | 2,256 (7.2)    |
| Stress-related disorders                 | 80,953                      | 34,110 (42.1)  | 34.5 (20.5-48.5)    | 68,431 (84.5)  | 10,356 (12.8)   | 2,166 (2.7)    |
| Stroke                                   | 67,539                      | 35,308 (52.3)  | 71.8 (61.1-81.3)    | 37,862 (56.1)  | 21,220 (31.4)   | 8,457 (12.5)   |
| Traumatic brain injury                   | 64,931                      | 35,456 (54.6)  | 34.3 (15.7-63.4)    | 50,924 (78.4)  | 10,610 (16.3)   | 3,397 (5.2)    |

Abbreviations: Q, quartile; CCI, Charlson Comorbidity Index.

**Suppl. Table 3. Occurrence of hospital-diagnosed brain disorders in the Danish population including incidence during 2011-2015 and prevalence in 2015 sorted in alphabetical order.**

| Disease group                            | Prevalent cohorts: 2015 |                                         | Incident cohorts: 2011-2015 |                                                  |
|------------------------------------------|-------------------------|-----------------------------------------|-----------------------------|--------------------------------------------------|
|                                          | Prevalence, N (%)       | Prevalence per 100,000 persons (95% CI) | Incidence, N                | Incidence rate per 100,000 person-years (95% CI) |
| Any brain disorder                       | 1,075,081 (18.9)        | 18,879 (18,844-18,915)                  | 381,759                     | 1,349 (1,345-1,353)                              |
| Alcohol abuse                            | 101,066 (1.8)           | 1,775 (1,764-1,786)                     | 37,032                      | 131 (130-132)                                    |
| Anxiety disorders                        | 96,943 (1.7)            | 1,702 (1,692-1,713)                     | 53,350                      | 189 (187-190)                                    |
| Bipolar disorder                         | 23,364 (0.4)            | 410 (405-416)                           | 9,838                       | 35 (34-35)                                       |
| Brain tumours                            | 14,953 (0.3)            | 263 (258-267)                           | 9,336                       | 33 (32-34)                                       |
| Cerebral palsy                           | 9,083 (0.2)             | 160 (156-163)                           | 2,145                       | 8 (7-8)                                          |
| Dementia                                 | 40,037 (0.7)            | 703 (696-710)                           | 42,798                      | 151 (150-153)                                    |
| Depression                               | 180,886 (3.2)           | 3,176 (3,162-3,191)                     | 78,926                      | 279 (277-281)                                    |
| Developmental and behavioural disorders  | 103,157 (1.8)           | 1,812 (1,800-1,823)                     | 48,562                      | 172 (170-173)                                    |
| Drug abuse                               | 50,066 (0.9)            | 879 (872-887)                           | 18,843                      | 67 (66-68)                                       |
| Eating disorders                         | 15,936 (0.3)            | 280 (276-284)                           | 6,011                       | 21 (21-22)                                       |
| Epilepsy                                 | 72,205 (1.3)            | 1,268 (1,259-1,277)                     | 21,255                      | 75 (74-76)                                       |
| Headache                                 | 96,252 (1.7)            | 1,690 (1,680-1,701)                     | 35,180                      | 124 (123-126)                                    |
| Infections of the central nervous system | 26,829 (0.5)            | 471 (466-477)                           | 9,501                       | 34 (33-34)                                       |
| Intellectual disability                  | 27,605 (0.5)            | 485 (479-491)                           | 8,166                       | 29 (28-29)                                       |
| Multiple sclerosis                       | 14,264 (0.3)            | 250 (246-255)                           | 3,345                       | 12 (11-12)                                       |
| Neuromuscular disorders                  | 7,080 (0.1)             | 124 (121-127)                           | 3,062                       | 11 (10-11)                                       |
| Other neurodegenerative disorders        | 2,192 (0.0)             | 38 (37-40)                              | 1,464                       | 5 (5-5)                                          |
| Parkinson's disease                      | 8,942 (0.2)             | 157 (154-160)                           | 6,478                       | 23 (22-23)                                       |
| Personality disorders                    | 71,334 (1.3)            | 1,253 (1,244-1,262)                     | 21,556                      | 76 (75-77)                                       |
| Polyneuropathy                           | 32,710 (0.6)            | 574 (568-581)                           | 17,925                      | 63 (62-64)                                       |
| Schizophrenia spectrum disorders         | 61,346 (1.1)            | 1,077 (1,069-1,086)                     | 19,316                      | 68 (67-69)                                       |
| Sleep disorders                          | 61,666 (1.1)            | 1,083 (1,074-1,091)                     | 31,316                      | 111 (109-112)                                    |
| Stress-related disorders                 | 196,291 (3.4)           | 3,447 (3,432-3,462)                     | 80,953                      | 286 (284-288)                                    |
| Stroke                                   | 120,065 (2.1)           | 2,108 (2,097-2,120)                     | 67,539                      | 239 (237-240)                                    |
| Traumatic brain injury                   | 249,348 (4.4)           | 4,379 (4,362-4,396)                     | 64,931                      | 229 (228-231)                                    |

Abbreviations: CI, confidence interval.

**Suppl. Table 4. Actual and attributable costs in total and per person in persons with prevalent brain disorders in 2015, and incident brain disorders during 2011-2015 sorted in alphabetical order and stratified by cost components.**

| Brain disorder     | Cost component                         | Prevalent cohort - 2015    |                                       |                                  |                                             | Incident cohort - 2011-2015                                           |
|--------------------|----------------------------------------|----------------------------|---------------------------------------|----------------------------------|---------------------------------------------|-----------------------------------------------------------------------|
|                    |                                        | Actual costs in 2015 (EUR) | Actual costs per person in 2015 (EUR) | Attributable costs in 2015 (EUR) | Attributable costs per person in 2015 (EUR) | Attributable costs per person in the first year after diagnosis (EUR) |
| Any brain disorder | Primary sector                         | 488,168,143                | 460                                   | 191,774,339                      | 181                                         | 175                                                                   |
|                    | Secondary sector - Outpatient          | 1,491,081,458              | 1,406                                 | 743,338,257                      | 701                                         | 2,702                                                                 |
|                    | Secondary sector - Inpatient           | 2,522,910,114              | 2,379                                 | 1,638,312,025                    | 1,545                                       | 8,457                                                                 |
|                    | Filled prescriptions                   | 533,852,195                | 503                                   | 319,922,005                      | 302                                         | 211                                                                   |
|                    | Home care                              | 700,068,647                | 660                                   | 529,492,180                      | 499                                         | 489                                                                   |
|                    | Nursing home / sheltered accommodation | 2,138,655,226              | 2,017                                 | 1,786,588,544                    | 1,685                                       | 749                                                                   |
|                    | Total cost (excl. lost productivity)   | 7,874,735,782              | 7,426                                 | 5,209,427,352                    | 4,912                                       | 12,783                                                                |
| Alcohol abuse      | Primary sector                         | 43,832,697                 | 444                                   | 10,708,496                       | 109                                         | 164                                                                   |
|                    | Secondary sector - Outpatient          | 182,619,411                | 1,851                                 | 90,265,391                       | 915                                         | 2,318                                                                 |
|                    | Secondary sector - Inpatient           | 509,785,016                | 5,166                                 | 396,078,314                      | 4,014                                       | 14,252                                                                |
|                    | Filled prescriptions                   | 70,574,116                 | 715                                   | 41,364,956                       | 419                                         | 329                                                                   |
|                    | Home care                              | 86,902,799                 | 881                                   | 69,319,977                       | 703                                         | 686                                                                   |
|                    | Nursing home / sheltered accommodation | 272,375,227                | 2,760                                 | 235,944,141                      | 2,391                                       | 1,019                                                                 |
|                    | Total cost (excl. lost productivity)   | 1,166,089,265              | 11,817                                | 843,681,275                      | 8,550                                       | 18,768                                                                |
| Anxiety disorders  | Primary sector                         | 46,880,525                 | 488                                   | 17,760,012                       | 185                                         | 270                                                                   |
|                    | Secondary sector - Outpatient          | 186,143,973                | 1,939                                 | 112,251,855                      | 1,169                                       | 4,937                                                                 |
|                    | Secondary sector - Inpatient           | 304,572,473                | 3,172                                 | 220,690,805                      | 2,298                                       | 8,872                                                                 |
|                    | Filled prescriptions                   | 58,721,973                 | 612                                   | 38,187,658                       | 398                                         | 502                                                                   |
|                    | Home care                              | 32,889,132                 | 343                                   | 20,728,003                       | 216                                         | 359                                                                   |
|                    | Nursing home / sheltered accommodation | 93,491,816                 | 974                                   | 63,280,196                       | 659                                         | 368                                                                   |
|                    | Total cost (excl. lost productivity)   | 722,699,890                | 7,527                                 | 472,898,530                      | 4,925                                       | 15,308                                                                |
| Bipolar disorder   | Primary sector                         | 12,927,768                 | 561                                   | 4,802,917                        | 209                                         | 227                                                                   |
|                    | Secondary sector - Outpatient          | 68,871,491                 | 2,990                                 | 47,030,959                       | 2,042                                       | 6,368                                                                 |
|                    | Secondary sector - Inpatient           | 147,299,161                | 6,395                                 | 120,588,736                      | 5,235                                       | 17,468                                                                |
|                    | Filled prescriptions                   | 23,251,036                 | 1,009                                 | 16,487,361                       | 716                                         | 755                                                                   |
|                    | Home care                              | 17,966,005                 | 780                                   | 12,684,093                       | 551                                         | 299                                                                   |
|                    | Nursing home / sheltered accommodation | 65,937,773                 | 2,863                                 | 52,520,523                       | 2,280                                       | 680                                                                   |
|                    | Total cost (excl. lost productivity)   | 336,253,233                | 14,598                                | 254,114,589                      | 11,032                                      | 25,797                                                                |
| Brain tumours      | Primary sector                         | 9,283,859                  | 640                                   | 3,508,912                        | 242                                         | 223                                                                   |
|                    | Secondary sector - Outpatient          | 42,180,950                 | 2,910                                 | 26,480,502                       | 1,827                                       | 12,604                                                                |

| Brain disorder                          | Cost component                         | Prevalent cohort - 2015    |                                       |                                  |                                             | Incident cohort - 2011-2015                                           |
|-----------------------------------------|----------------------------------------|----------------------------|---------------------------------------|----------------------------------|---------------------------------------------|-----------------------------------------------------------------------|
|                                         |                                        | Actual costs in 2015 (EUR) | Actual costs per person in 2015 (EUR) | Attributable costs in 2015 (EUR) | Attributable costs per person in 2015 (EUR) | Attributable costs per person in the first year after diagnosis (EUR) |
|                                         | Secondary sector - Inpatient           | 57,321,123                 | 3,954                                 | 36,118,409                       | 2,492                                       | 29,223                                                                |
|                                         | Filled prescriptions                   | 8,861,608                  | 611                                   | 3,527,159                        | 243                                         | 295                                                                   |
|                                         | Home care                              | 16,473,487                 | 1,136                                 | 10,430,046                       | 720                                         | 901                                                                   |
|                                         | Nursing home / sheltered accommodation | 31,261,211                 | 2,157                                 | 14,864,894                       | 1,025                                       | 302                                                                   |
|                                         | Total cost (excl. lost productivity)   | 165,382,238                | 11,409                                | 94,929,922                       | 6,549                                       | 43,548                                                                |
| Cerebral palsy                          | Primary sector                         | 13,167,622                 | 1,462                                 | 11,318,548                       | 1,256                                       | 960                                                                   |
|                                         | Secondary sector - Outpatient          | 11,430,545                 | 1,269                                 | 6,723,166                        | 746                                         | 2,731                                                                 |
|                                         | Secondary sector - Inpatient           | 27,487,812                 | 3,051                                 | 21,438,091                       | 2,380                                       | 11,838                                                                |
|                                         | Filled prescriptions                   | 6,630,687                  | 736                                   | 5,437,246                        | 604                                         | 567                                                                   |
|                                         | Home care                              | 13,763,599                 | 1,528                                 | 13,328,070                       | 1,479                                       | 2,111                                                                 |
|                                         | Nursing home / sheltered accommodation | 11,864,848                 | 1,317                                 | 10,870,651                       | 1,207                                       | 3,193                                                                 |
|                                         | Total cost (excl. lost productivity)   | 84,345,114                 | 9,363                                 | 69,115,771                       | 7,672                                       | 21,400                                                                |
| Dementia                                | Primary sector                         | 24,098,562                 | 667                                   | 4,596,178                        | 127                                         | 137                                                                   |
|                                         | Secondary sector - Outpatient          | 43,138,878                 | 1,193                                 | -5,214,136                       | -144                                        | 1,567                                                                 |
|                                         | Secondary sector - Inpatient           | 140,689,111                | 3,891                                 | 46,270,459                       | 1,280                                       | 6,237                                                                 |
|                                         | Filled prescriptions                   | 35,544,655                 | 983                                   | 14,366,512                       | 397                                         | 458                                                                   |
|                                         | Home care                              | 148,296,718                | 4,102                                 | 85,823,645                       | 2,374                                       | 3,175                                                                 |
|                                         | Nursing home / sheltered accommodation | 1,079,664,024              | 29,862                                | 933,749,795                      | 25,826                                      | 10,891                                                                |
|                                         | Total cost (excl. lost productivity)   | 1,471,431,949              | 40,698                                | 1,079,592,452                    | 29,860                                      | 22,465                                                                |
| Depression                              | Primary sector                         | 95,893,225                 | 539                                   | 34,953,943                       | 196                                         | 294                                                                   |
|                                         | Secondary sector - Outpatient          | 353,092,962                | 1,983                                 | 198,404,020                      | 1,115                                       | 4,415                                                                 |
|                                         | Secondary sector - Inpatient           | 632,094,332                | 3,551                                 | 437,349,885                      | 2,457                                       | 11,336                                                                |
|                                         | Filled prescriptions                   | 123,586,689                | 694                                   | 75,514,229                       | 424                                         | 447                                                                   |
|                                         | Home care                              | 147,797,688                | 830                                   | 94,735,383                       | 532                                         | 817                                                                   |
|                                         | Nursing home / sheltered accommodation | 510,771,406                | 2,869                                 | 367,705,421                      | 2,066                                       | 1,275                                                                 |
|                                         | Total cost (excl. lost productivity)   | 1,863,236,302              | 10,466                                | 1,208,662,881                    | 6,789                                       | 18,584                                                                |
| Developmental and behavioural disorders | Primary sector                         | 27,337,787                 | 266                                   | 10,369,345                       | 101                                         | 104                                                                   |
|                                         | Secondary sector - Outpatient          | 116,363,305                | 1,130                                 | 75,097,169                       | 729                                         | 3,890                                                                 |
|                                         | Secondary sector - Inpatient           | 236,746,401                | 2,299                                 | 190,215,735                      | 1,847                                       | 5,695                                                                 |
|                                         | Filled prescriptions                   | 53,648,059                 | 521                                   | 45,268,384                       | 440                                         | 477                                                                   |
|                                         | Home care                              | 5,642,767                  | 55                                    | 4,450,425                        | 43                                          | 28                                                                    |
|                                         | Nursing home / sheltered accommodation | 11,467,658                 | 111                                   | 8,904,950                        | 86                                          | 39                                                                    |

| Brain disorder                           | Cost component                         | Prevalent cohort - 2015    |                                       |                                  |                                             | Incident cohort - 2011-2015                                           |
|------------------------------------------|----------------------------------------|----------------------------|---------------------------------------|----------------------------------|---------------------------------------------|-----------------------------------------------------------------------|
|                                          |                                        | Actual costs in 2015 (EUR) | Actual costs per person in 2015 (EUR) | Attributable costs in 2015 (EUR) | Attributable costs per person in 2015 (EUR) | Attributable costs per person in the first year after diagnosis (EUR) |
|                                          | Total cost (excl. lost productivity)   | 451,205,976                | 4,382                                 | 334,306,007                      | 3,247                                       | 10,235                                                                |
| Drug abuse                               | Primary sector                         | 18,789,575                 | 379                                   | 6,103,985                        | 123                                         | 173                                                                   |
|                                          | Secondary sector - Outpatient          | 104,455,802                | 2,110                                 | 71,938,513                       | 1,453                                       | 3,539                                                                 |
|                                          | Secondary sector - Inpatient           | 294,331,957                | 5,944                                 | 257,849,075                      | 5,207                                       | 14,939                                                                |
|                                          | Filled prescriptions                   | 39,585,700                 | 799                                   | 30,697,450                       | 620                                         | 525                                                                   |
|                                          | Home care                              | 21,420,415                 | 433                                   | 17,004,322                       | 343                                         | 320                                                                   |
|                                          | Nursing home / sheltered accommodation | 55,090,031                 | 1,113                                 | 44,708,406                       | 903                                         | 324                                                                   |
|                                          | Total cost (excl. lost productivity)   | 533,673,480                | 10,778                                | 428,301,752                      | 8,650                                       | 19,820                                                                |
| Eating disorders                         | Primary sector                         | 6,954,226                  | 438                                   | 2,231,551                        | 141                                         | 112                                                                   |
|                                          | Secondary sector - Outpatient          | 41,617,887                 | 2,621                                 | 30,089,653                       | 1,895                                       | 8,660                                                                 |
|                                          | Secondary sector - Inpatient           | 78,974,413                 | 4,973                                 | 66,777,164                       | 4,205                                       | 21,099                                                                |
|                                          | Filled prescriptions                   | 5,121,915                  | 323                                   | 2,656,004                        | 167                                         | 108                                                                   |
|                                          | Home care                              | 1,027,908                  | 65                                    | 768,275                          | 48                                          | 40                                                                    |
|                                          | Nursing home / sheltered accommodation | 1,702,989                  | 107                                   | 1,282,483                        | 81                                          | 65                                                                    |
|                                          | Total cost (excl. lost productivity)   | 135,399,338                | 8,526                                 | 103,805,130                      | 6,536                                       | 30,084                                                                |
| Epilepsy                                 | Primary sector                         | 41,173,985                 | 580                                   | 19,904,667                       | 280                                         | 350                                                                   |
|                                          | Secondary sector - Outpatient          | 108,270,760                | 1,524                                 | 51,399,429                       | 723                                         | 3,615                                                                 |
|                                          | Secondary sector - Inpatient           | 236,872,420                | 3,334                                 | 162,384,494                      | 2,286                                       | 13,573                                                                |
|                                          | Filled prescriptions                   | 56,830,263                 | 800                                   | 39,757,000                       | 560                                         | 539                                                                   |
|                                          | Home care                              | 71,643,564                 | 1,008                                 | 57,009,489                       | 802                                         | 1,439                                                                 |
|                                          | Nursing home / sheltered accommodation | 186,490,441                | 2,625                                 | 148,199,767                      | 2,086                                       | 3,600                                                                 |
|                                          | Total cost (excl. lost productivity)   | 701,281,434                | 9,871                                 | 478,654,845                      | 6,737                                       | 23,117                                                                |
| Headache                                 | Primary sector                         | 45,555,311                 | 475                                   | 15,231,927                       | 159                                         | 213                                                                   |
|                                          | Secondary sector - Outpatient          | 133,513,223                | 1,393                                 | 53,710,708                       | 560                                         | 1,579                                                                 |
|                                          | Secondary sector - Inpatient           | 165,735,926                | 1,729                                 | 72,915,060                       | 761                                         | 2,660                                                                 |
|                                          | Filled prescriptions                   | 41,304,678                 | 431                                   | 18,445,725                       | 192                                         | 144                                                                   |
|                                          | Home care                              | 18,540,020                 | 193                                   | 5,347,719                        | 56                                          | 24                                                                    |
|                                          | Nursing home / sheltered accommodation | 38,547,780                 | 402                                   | 7,238,248                        | 76                                          | -2                                                                    |
|                                          | Total cost (excl. lost productivity)   | 443,196,937                | 4,625                                 | 172,889,385                      | 1,804                                       | 4,618                                                                 |
| Infections of the central nervous system | Primary sector                         | 11,203,340                 | 421                                   | 3,297,607                        | 124                                         | 168                                                                   |
|                                          | Secondary sector - Outpatient          | 33,558,808                 | 1,262                                 | 12,417,210                       | 467                                         | 2,276                                                                 |
|                                          | Secondary sector - Inpatient           | 53,806,027                 | 2,023                                 | 25,888,210                       | 974                                         | 19,530                                                                |
|                                          | Filled prescriptions                   | 9,714,465                  | 365                                   | 3,292,758                        | 124                                         | 181                                                                   |

| Brain disorder                    | Cost component                         | Prevalent cohort - 2015    |                                       |                                  |                                             | Incident cohort - 2011-2015                                           |
|-----------------------------------|----------------------------------------|----------------------------|---------------------------------------|----------------------------------|---------------------------------------------|-----------------------------------------------------------------------|
|                                   |                                        | Actual costs in 2015 (EUR) | Actual costs per person in 2015 (EUR) | Attributable costs in 2015 (EUR) | Attributable costs per person in 2015 (EUR) | Attributable costs per person in the first year after diagnosis (EUR) |
|                                   | Home care                              | 12,811,201                 | 482                                   | 7,584,973                        | 285                                         | 563                                                                   |
|                                   | Nursing home / sheltered accommodation | 27,418,463                 | 1,031                                 | 14,310,372                       | 538                                         | 461                                                                   |
|                                   | Total cost (excl. lost productivity)   | 148,512,305                | 5,585                                 | 66,791,130                       | 2,512                                       | 23,180                                                                |
| Intellectual disability           | Primary sector                         | 15,988,512                 | 583                                   | 9,893,121                        | 361                                         | 278                                                                   |
|                                   | Secondary sector - Outpatient          | 33,228,973                 | 1,213                                 | 17,182,705                       | 627                                         | 3,055                                                                 |
|                                   | Secondary sector - Inpatient           | 102,644,232                | 3,746                                 | 84,346,003                       | 3,078                                       | 9,397                                                                 |
|                                   | Filled prescriptions                   | 21,583,017                 | 788                                   | 17,432,722                       | 636                                         | 538                                                                   |
|                                   | Home care                              | 13,976,239                 | 510                                   | 12,449,542                       | 454                                         | 393                                                                   |
|                                   | Nursing home / sheltered accommodation | 32,339,423                 | 1,180                                 | 29,128,690                       | 1,063                                       | 598                                                                   |
|                                   | Total cost (excl. lost productivity)   | 219,760,396                | 8,020                                 | 170,432,783                      | 6,220                                       | 14,258                                                                |
| Multiple sclerosis                | Primary sector                         | 21,206,010                 | 1,503                                 | 16,200,681                       | 1,148                                       | 583                                                                   |
|                                   | Secondary sector - Outpatient          | 40,714,728                 | 2,885                                 | 27,233,358                       | 1,930                                       | 10,465                                                                |
|                                   | Secondary sector - Inpatient           | 43,448,943                 | 3,079                                 | 27,817,864                       | 1,971                                       | 4,925                                                                 |
|                                   | Filled prescriptions                   | 9,720,026                  | 689                                   | 5,629,372                        | 399                                         | 189                                                                   |
|                                   | Home care                              | 51,880,624                 | 3,676                                 | 49,746,582                       | 3,525                                       | 644                                                                   |
|                                   | Nursing home / sheltered accommodation | 31,328,567                 | 2,220                                 | 27,272,490                       | 1,933                                       | 335                                                                   |
|                                   | Total cost (excl. lost productivity)   | 198,298,897                | 14,051                                | 153,900,347                      | 10,905                                      | 17,140                                                                |
| Neuromuscular disorders           | Primary sector                         | 6,282,164                  | 901                                   | 3,972,937                        | 570                                         | 353                                                                   |
|                                   | Secondary sector - Outpatient          | 14,433,119                 | 2,071                                 | 8,172,495                        | 1,172                                       | 3,211                                                                 |
|                                   | Secondary sector - Inpatient           | 29,246,940                 | 4,196                                 | 20,898,189                       | 2,998                                       | 16,132                                                                |
|                                   | Filled prescriptions                   | 4,437,530                  | 637                                   | 2,451,542                        | 352                                         | 389                                                                   |
|                                   | Home care                              | 8,986,447                  | 1,289                                 | 7,194,501                        | 1,032                                       | 544                                                                   |
|                                   | Nursing home / sheltered accommodation | 8,955,012                  | 1,285                                 | 4,625,467                        | 664                                         | 147                                                                   |
|                                   | Total cost (excl. lost productivity)   | 72,341,211                 | 10,378                                | 47,315,130                       | 6,788                                       | 20,777                                                                |
| Other neurodegenerative disorders | Primary sector                         | 3,467,634                  | 1,660                                 | 2,695,799                        | 1,290                                       | 1,214                                                                 |
|                                   | Secondary sector - Outpatient          | 3,744,735                  | 1,792                                 | 1,557,828                        | 746                                         | 2,623                                                                 |
|                                   | Secondary sector - Inpatient           | 12,458,820                 | 5,963                                 | 9,519,636                        | 4,556                                       | 18,250                                                                |
|                                   | Filled prescriptions                   | 2,025,361                  | 969                                   | 1,312,465                        | 628                                         | 1,152                                                                 |
|                                   | Home care                              | 9,972,538                  | 4,773                                 | 9,295,614                        | 4,449                                       | 5,491                                                                 |
|                                   | Nursing home / sheltered accommodation | 15,620,797                 | 7,476                                 | 13,965,869                       | 6,684                                       | 3,904                                                                 |
|                                   | Total cost (excl. lost productivity)   | 47,289,884                 | 22,634                                | 38,347,211                       | 18,354                                      | 32,634                                                                |
| Parkinson's disease               | Primary sector                         | 14,860,564                 | 1,776                                 | 10,688,805                       | 1,278                                       | 910                                                                   |

| Brain disorder                   | Cost component                         | Prevalent cohort - 2015    |                                       |                                  |                                             | Incident cohort - 2011-2015                                           |
|----------------------------------|----------------------------------------|----------------------------|---------------------------------------|----------------------------------|---------------------------------------------|-----------------------------------------------------------------------|
|                                  |                                        | Actual costs in 2015 (EUR) | Actual costs per person in 2015 (EUR) | Attributable costs in 2015 (EUR) | Attributable costs per person in 2015 (EUR) | Attributable costs per person in the first year after diagnosis (EUR) |
|                                  | Secondary sector - Outpatient          | 17,312,390                 | 2,069                                 | 5,323,437                        | 636                                         | 2,069                                                                 |
|                                  | Secondary sector - Inpatient           | 46,402,317                 | 5,546                                 | 27,109,682                       | 3,240                                       | 8,711                                                                 |
|                                  | Filled prescriptions                   | 27,652,172                 | 3,305                                 | 23,257,252                       | 2,780                                       | 1,178                                                                 |
|                                  | Home care                              | 45,766,641                 | 5,470                                 | 38,139,915                       | 4,559                                       | 3,594                                                                 |
|                                  | Nursing home / sheltered accommodation | 118,302,501                | 14,140                                | 96,210,216                       | 11,499                                      | 5,067                                                                 |
|                                  | Total cost (excl. lost productivity)   | 270,296,586                | 32,307                                | 200,729,307                      | 23,992                                      | 21,530                                                                |
| Personality disorders            | Primary sector                         | 33,726,394                 | 475                                   | 12,370,687                       | 174                                         | 180                                                                   |
|                                  | Secondary sector - Outpatient          | 161,704,804                | 2,280                                 | 108,438,891                      | 1,529                                       | 5,307                                                                 |
|                                  | Secondary sector - Inpatient           | 294,012,210                | 4,145                                 | 237,084,594                      | 3,342                                       | 10,946                                                                |
|                                  | Filled prescriptions                   | 47,982,591                 | 676                                   | 33,993,717                       | 479                                         | 391                                                                   |
|                                  | Home care                              | 18,267,898                 | 258                                   | 13,204,541                       | 186                                         | 60                                                                    |
|                                  | Nursing home / sheltered accommodation | 50,162,995                 | 707                                   | 39,971,083                       | 563                                         | 175                                                                   |
|                                  | Total cost (excl. lost productivity)   | 605,856,892                | 8,541                                 | 445,063,513                      | 6,274                                       | 17,058                                                                |
| Polyneuropathy                   | Primary sector                         | 22,995,926                 | 721                                   | 9,555,562                        | 300                                         | 324                                                                   |
|                                  | Secondary sector - Outpatient          | 84,279,793                 | 2,643                                 | 47,316,582                       | 1,484                                       | 3,465                                                                 |
|                                  | Secondary sector - Inpatient           | 144,827,869                | 4,542                                 | 88,462,288                       | 2,775                                       | 8,416                                                                 |
|                                  | Filled prescriptions                   | 30,234,724                 | 948                                   | 16,995,029                       | 533                                         | 569                                                                   |
|                                  | Home care                              | 53,022,119                 | 1,663                                 | 35,217,614                       | 1,105                                       | 773                                                                   |
|                                  | Nursing home / sheltered accommodation | 92,592,235                 | 2,904                                 | 40,739,401                       | 1,278                                       | -89                                                                   |
|                                  | Total cost (excl. lost productivity)   | 427,952,666                | 13,423                                | 238,286,476                      | 7,474                                       | 13,458                                                                |
| Schizophrenia spectrum disorders | Primary sector                         | 25,870,906                 | 427                                   | 7,901,500                        | 130                                         | 130                                                                   |
|                                  | Secondary sector - Outpatient          | 184,183,351                | 3,039                                 | 138,302,570                      | 2,282                                       | 7,692                                                                 |
|                                  | Secondary sector - Inpatient           | 471,018,165                | 7,773                                 | 418,546,262                      | 6,907                                       | 28,598                                                                |
|                                  | Filled prescriptions                   | 60,736,022                 | 1,002                                 | 47,173,595                       | 778                                         | 584                                                                   |
|                                  | Home care                              | 40,669,756                 | 671                                   | 31,640,056                       | 522                                         | 328                                                                   |
|                                  | Nursing home / sheltered accommodation | 144,768,784                | 2,389                                 | 123,117,720                      | 2,032                                       | 1,259                                                                 |
|                                  | Total cost (excl. lost productivity)   | 927,246,985                | 15,302                                | 766,681,703                      | 12,652                                      | 38,591                                                                |
| Sleep disorders                  | Primary sector                         | 31,353,798                 | 512                                   | 11,799,623                       | 193                                         | 238                                                                   |
|                                  | Secondary sector - Outpatient          | 98,914,079                 | 1,616                                 | 41,921,108                       | 685                                         | 2,096                                                                 |
|                                  | Secondary sector - Inpatient           | 145,942,944                | 2,385                                 | 69,035,777                       | 1,128                                       | 3,396                                                                 |
|                                  | Filled prescriptions                   | 41,479,250                 | 678                                   | 23,820,309                       | 389                                         | 394                                                                   |
|                                  | Home care                              | 20,461,339                 | 334                                   | 9,184,546                        | 150                                         | 217                                                                   |

| Brain disorder           | Cost component                         | Prevalent cohort - 2015    |                                       |                                  |                                             | Incident cohort - 2011-2015                                           |
|--------------------------|----------------------------------------|----------------------------|---------------------------------------|----------------------------------|---------------------------------------------|-----------------------------------------------------------------------|
|                          |                                        | Actual costs in 2015 (EUR) | Actual costs per person in 2015 (EUR) | Attributable costs in 2015 (EUR) | Attributable costs per person in 2015 (EUR) | Attributable costs per person in the first year after diagnosis (EUR) |
|                          | Nursing home / sheltered accommodation | 31,784,606                 | 519                                   | 6,941,740                        | 113                                         | 45                                                                    |
|                          | Total cost (excl. lost productivity)   | 369,936,015                | 6,045                                 | 162,703,103                      | 2,659                                       | 6,386                                                                 |
| Stress-related disorders | Primary sector                         | 86,677,745                 | 444                                   | 29,534,278                       | 151                                         | 251                                                                   |
|                          | Secondary sector - Outpatient          | 334,672,975                | 1,716                                 | 190,005,389                      | 974                                         | 3,344                                                                 |
|                          | Secondary sector - Inpatient           | 594,516,328                | 3,048                                 | 435,161,116                      | 2,231                                       | 8,650                                                                 |
|                          | Filled prescriptions                   | 94,996,342                 | 487                                   | 55,121,881                       | 283                                         | 263                                                                   |
|                          | Home care                              | 52,036,361                 | 267                                   | 33,412,202                       | 171                                         | 132                                                                   |
|                          | Nursing home / sheltered accommodation | 136,104,200                | 698                                   | 94,380,524                       | 484                                         | 302                                                                   |
|                          | Total cost (excl. lost productivity)   | 1,299,003,951              | 6,660                                 | 837,615,391                      | 4,295                                       | 12,942                                                                |
| Stroke                   | Primary sector                         | 87,618,648                 | 759                                   | 36,193,449                       | 313                                         | 275                                                                   |
|                          | Secondary sector - Outpatient          | 200,887,719                | 1,740                                 | 56,107,195                       | 486                                         | 1,741                                                                 |
|                          | Secondary sector - Inpatient           | 462,612,656                | 4,006                                 | 236,363,400                      | 2,047                                       | 24,956                                                                |
|                          | Filled prescriptions                   | 92,706,631                 | 803                                   | 39,925,529                       | 346                                         | 356                                                                   |
|                          | Home care                              | 262,819,364                | 2,276                                 | 179,189,377                      | 1,552                                       | 1,443                                                                 |
|                          | Nursing home / sheltered accommodation | 710,435,792                | 6,152                                 | 461,833,282                      | 4,000                                       | 1,882                                                                 |
|                          | Total cost (excl. lost productivity)   | 1,817,080,811              | 15,736                                | 1,009,612,232                    | 8,743                                       | 30,654                                                                |
| Traumatic brain injury   | Primary sector                         | 83,545,461                 | 338                                   | 18,644,498                       | 75                                          | 140                                                                   |
|                          | Secondary sector - Outpatient          | 239,309,856                | 968                                   | 69,116,574                       | 280                                         | 707                                                                   |
|                          | Secondary sector - Inpatient           | 428,225,272                | 1,732                                 | 212,472,590                      | 859                                         | 7,836                                                                 |
|                          | Filled prescriptions                   | 75,591,648                 | 306                                   | 26,356,451                       | 107                                         | 117                                                                   |
|                          | Home care                              | 92,933,811                 | 376                                   | 50,946,346                       | 206                                         | 438                                                                   |
|                          | Nursing home / sheltered accommodation | 277,317,019                | 1,122                                 | 163,141,079                      | 660                                         | 950                                                                   |
|                          | Total cost (excl. lost productivity)   | 1,196,923,068              | 4,841                                 | 540,677,538                      | 2,187                                       | 10,188                                                                |

Abbreviations: EUR, Euro.



**Suppl. Table 5. Lost productivity in persons with prevalent brain disorders in Denmark in 2015, and incident brain disorders in Denmark during 2011-2015.**

| Brain disorder                           | Lost productivity associated with illness  |                                                       |                                                                           | Lost productivity due to premature death                           |                                                                               |                                                                                                       |
|------------------------------------------|--------------------------------------------|-------------------------------------------------------|---------------------------------------------------------------------------|--------------------------------------------------------------------|-------------------------------------------------------------------------------|-------------------------------------------------------------------------------------------------------|
|                                          | Attributable lost production in 2015 (EUR) | Attributable lost production per person in 2015 (EUR) | Attributable lost production per person in the year after diagnosis (EUR) | Attributable lost production among patients who died in 2015 (EUR) | Attributable lost production per person among patients who died in 2015 (EUR) | Attributable lost production per person among patients who died within one year after diagnosis (EUR) |
| Any brain disorder                       | 10,871,306,597                             | 15,471                                                | 11,501                                                                    | 310,599,261                                                        | 66,595                                                                        | 176,821                                                                                               |
| Alcohol abuse                            | 2,177,095,714                              | 30,509                                                | 26,454                                                                    | 60,885,257                                                         | 30,519                                                                        | 83,486                                                                                                |
| Anxiety disorders                        | 1,540,715,518                              | 19,281                                                | 19,717                                                                    | 32,197,400                                                         | 59,515                                                                        | 145,515                                                                                               |
| Bipolar disorder                         | 474,459,456                                | 27,521                                                | 25,383                                                                    | 6,136,984                                                          | 37,883                                                                        | 136,861                                                                                               |
| Brain tumours                            | 62,414,375                                 | 8,259                                                 | 15,068                                                                    | 44,062,492                                                         | 174,851                                                                       | 205,107                                                                                               |
| Cerebral palsy                           | 126,484,627                                | 24,291                                                | 31,767                                                                    | 487,951                                                            | 7,999                                                                         | 55,995                                                                                                |
| Dementia                                 | 118,974,339                                | 32,436                                                | 28,305                                                                    | 1,408,193                                                          | 8,140                                                                         | 28,505                                                                                                |
| Depression                               | 2,900,683,027                              | 21,708                                                | 20,838                                                                    | 64,470,952                                                         | 63,706                                                                        | 162,215                                                                                               |
| Developmental and behavioural disorders  | 845,403,290                                | 14,455                                                | 22,423                                                                    | 6,886,963                                                          | 47,171                                                                        | 96,899                                                                                                |
| Drug abuse                               | 1,330,382,612                              | 29,742                                                | 24,512                                                                    | 14,271,378                                                         | 22,908                                                                        | 67,596                                                                                                |
| Eating disorders                         | 83,103,235                                 | 5,798                                                 | 6,941                                                                     | 1,407,442                                                          | 54,132                                                                        | 25,604                                                                                                |
| Epilepsy                                 | 757,818,260                                | 16,449                                                | 18,764                                                                    | 39,647,665                                                         | 61,469                                                                        | 167,731                                                                                               |
| Headache                                 | 490,757,570                                | 6,493                                                 | 6,165                                                                     | 21,177,971                                                         | 101,330                                                                       | 174,465                                                                                               |
| Infections of the central nervous system | 30,214,014                                 | 1,814                                                 | 2,093                                                                     | 9,137,033                                                          | 103,830                                                                       | 152,402                                                                                               |
| Intellectual disability                  | 528,043,228                                | 29,465                                                | 30,237                                                                    | 278,285                                                            | 1,457                                                                         | 9,078                                                                                                 |
| Multiple sclerosis                       | 189,128,371                                | 16,804                                                | 9,354                                                                     | 1,721,160                                                          | 15,367                                                                        | 142,356                                                                                               |
| Neuromuscular disorders                  | 61,263,234                                 | 14,022                                                | 9,262                                                                     | 1,733,127                                                          | 36,875                                                                        | 106,274                                                                                               |
| Other neurodegenerative disorders        | 31,346,429                                 | 27,716                                                | 21,953                                                                    | 3,829,300                                                          | 55,497                                                                        | 134,409                                                                                               |
| Parkinson's disease                      | 32,248,038                                 | 22,662                                                | 14,259                                                                    | 3,565                                                              | 105                                                                           | 49,396                                                                                                |
| Personality disorders                    | 1,675,321,683                              | 25,663                                                | 22,217                                                                    | 13,071,803                                                         | 34,858                                                                        | 105,239                                                                                               |
| Polyneuropathy                           | 238,332,654                                | 16,662                                                | 16,701                                                                    | 8,543,728                                                          | 29,873                                                                        | 78,341                                                                                                |
| Schizophrenia spectrum disorders         | 1,707,738,198                              | 33,710                                                | 26,581                                                                    | 9,960,281                                                          | 17,173                                                                        | 90,396                                                                                                |
| Sleep disorders                          | 336,760,666                                | 8,691                                                 | 8,554                                                                     | 18,811,390                                                         | 79,373                                                                        | 133,551                                                                                               |
| Stress-related disorders                 | 3,167,569,516                              | 19,310                                                | 19,520                                                                    | 63,414,446                                                         | 69,917                                                                        | 175,773                                                                                               |
| Stroke                                   | 630,213,779                                | 16,502                                                | 14,382                                                                    | 25,874,307                                                         | 39,085                                                                        | 140,923                                                                                               |
| Traumatic brain injury                   | 1,241,809,744                              | 7,179                                                 | 7,245                                                                     | 41,136,013                                                         | 48,739                                                                        | 121,008                                                                                               |

Abbreviations: EUR, Euro.

## Supplementary figures

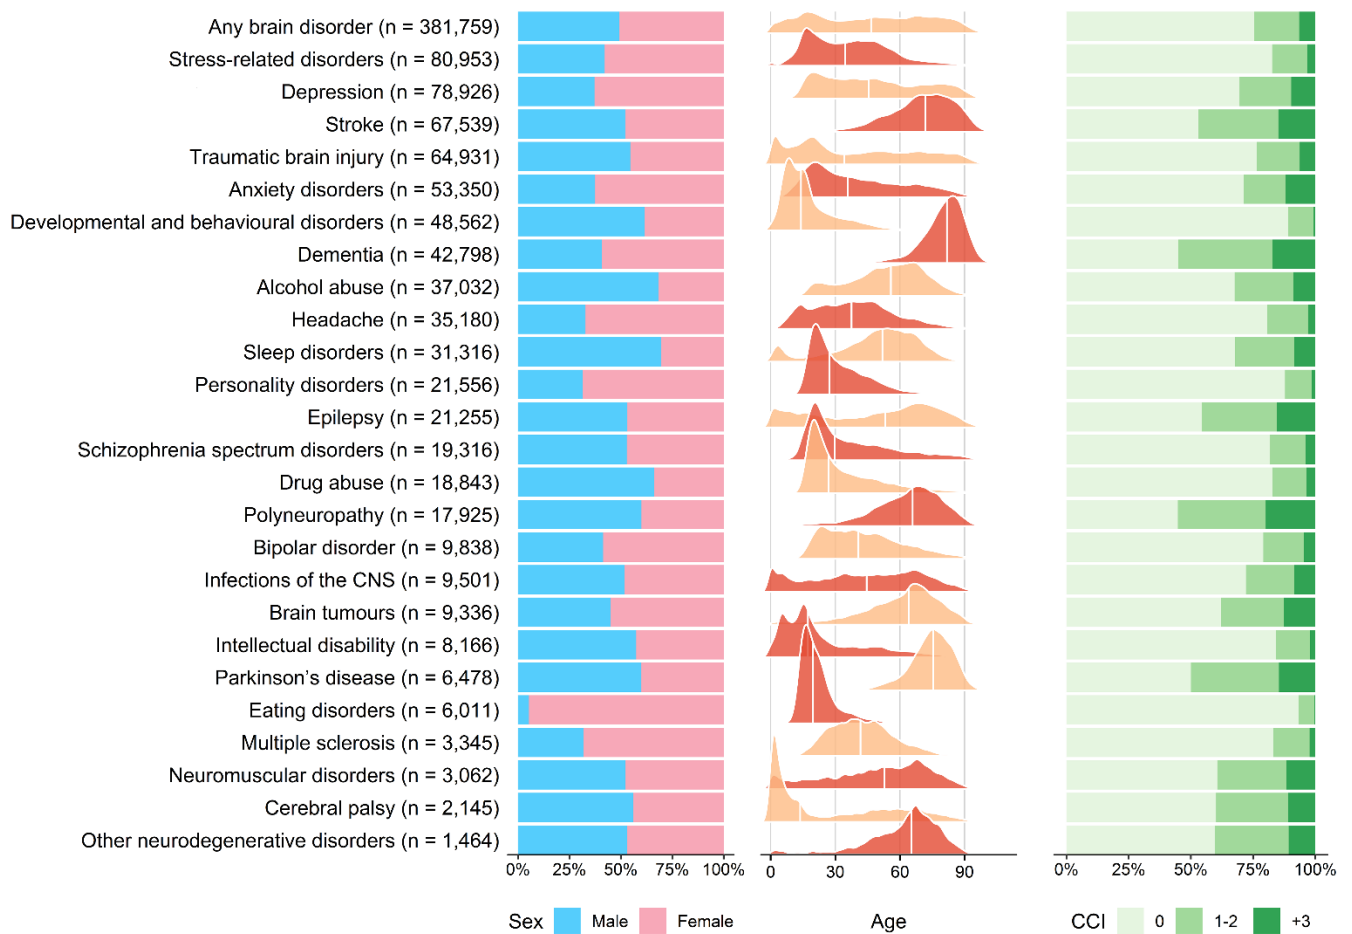

**Suppl. Figure 1. Characteristics of patients with incident brain disorders in Denmark during 2011-2015 sorted from highest to lowest incidence (the white line in the age distribution represents the median age in each cohort).**

Abbreviations: CNS, central nervous system; CCI, Charlson Comorbidity Index

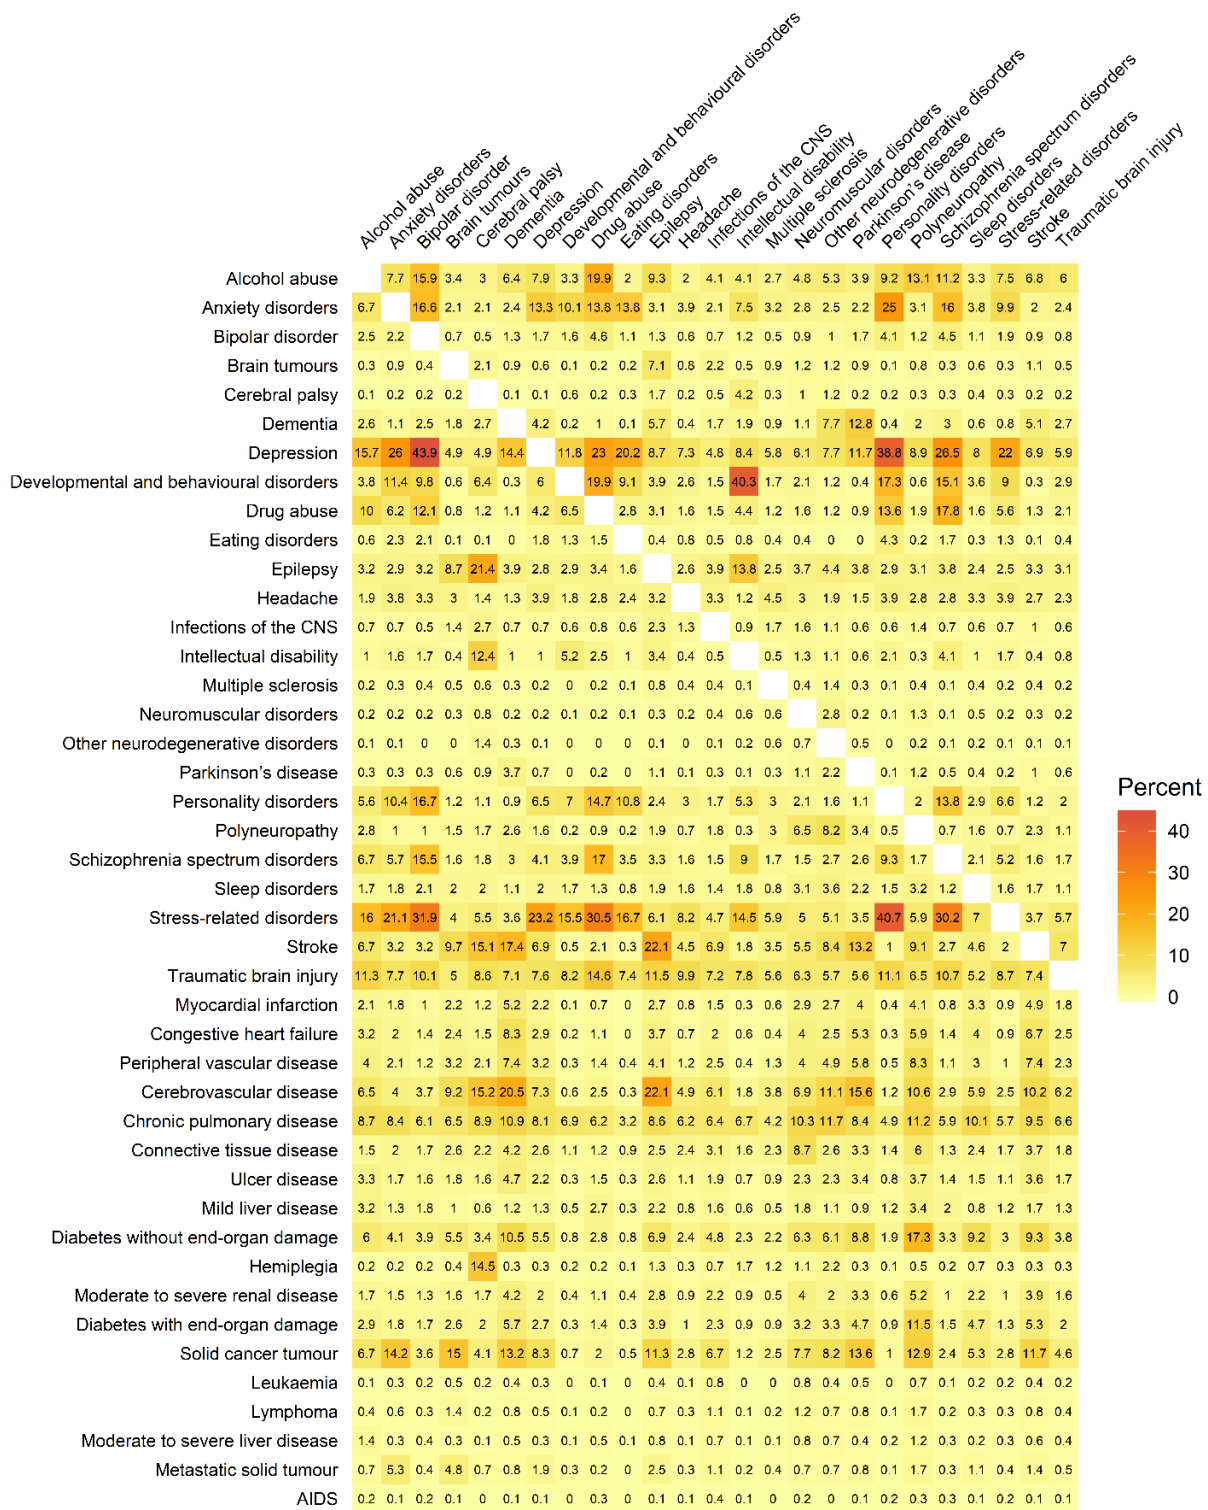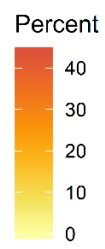

Suppl. Figure 2. Proportion of persons with incident brain disorders in the Danish population during 2011-2015 (columns), who had been diagnosed with comorbid brain or non-psychiatric disorders included in the Charlson Comorbidity Index up to 10 years before the index date of the brain disorder (rows).

Abbreviations: CNS, central nervous system

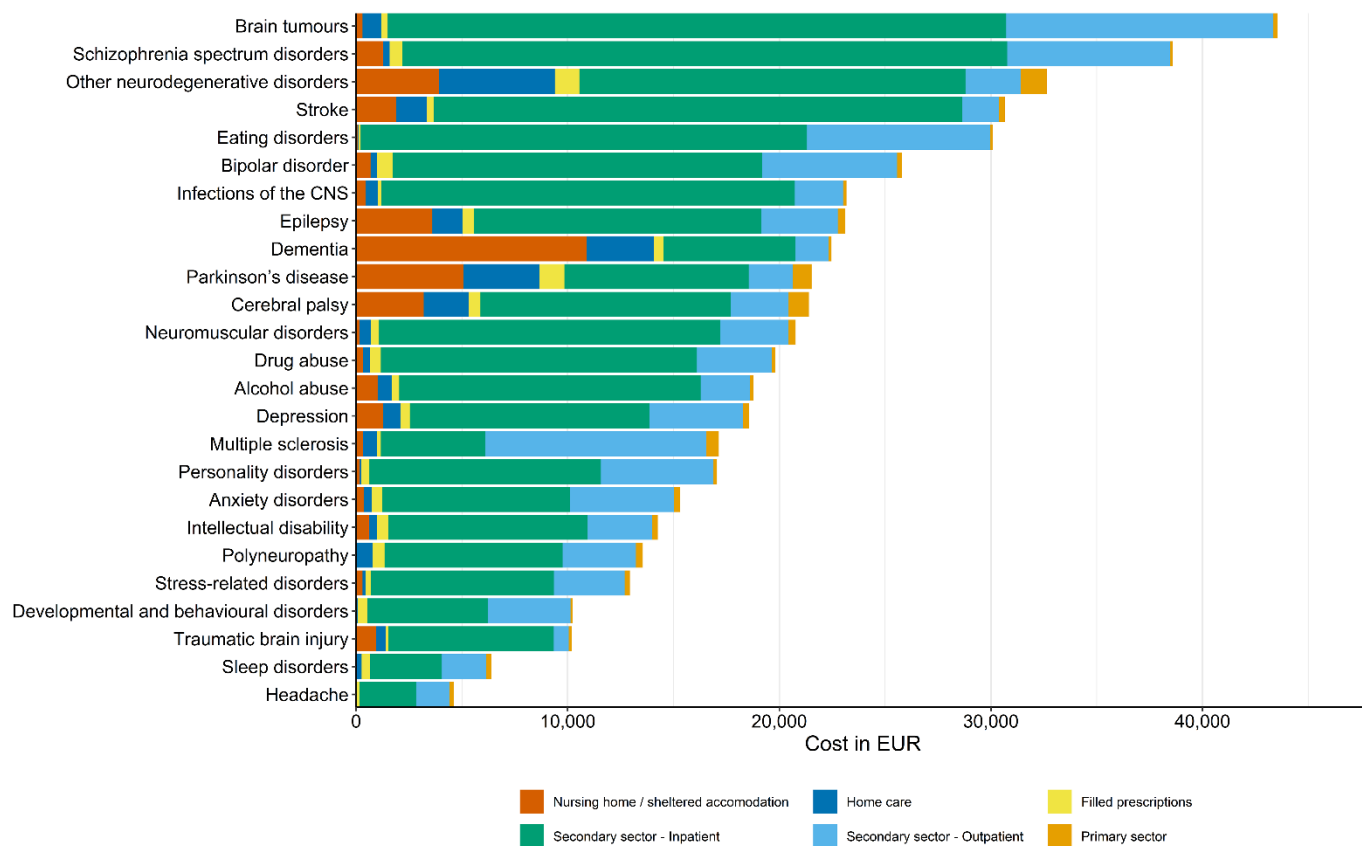

**Suppl. Figure 3. Attributable direct costs per person during the first year after diagnosis in persons with incident brain disorders in Denmark during 2011-2015 (in 2015 prices) sorted from highest to lowest costs.**

**Abbreviations: CNS, central nervous system**

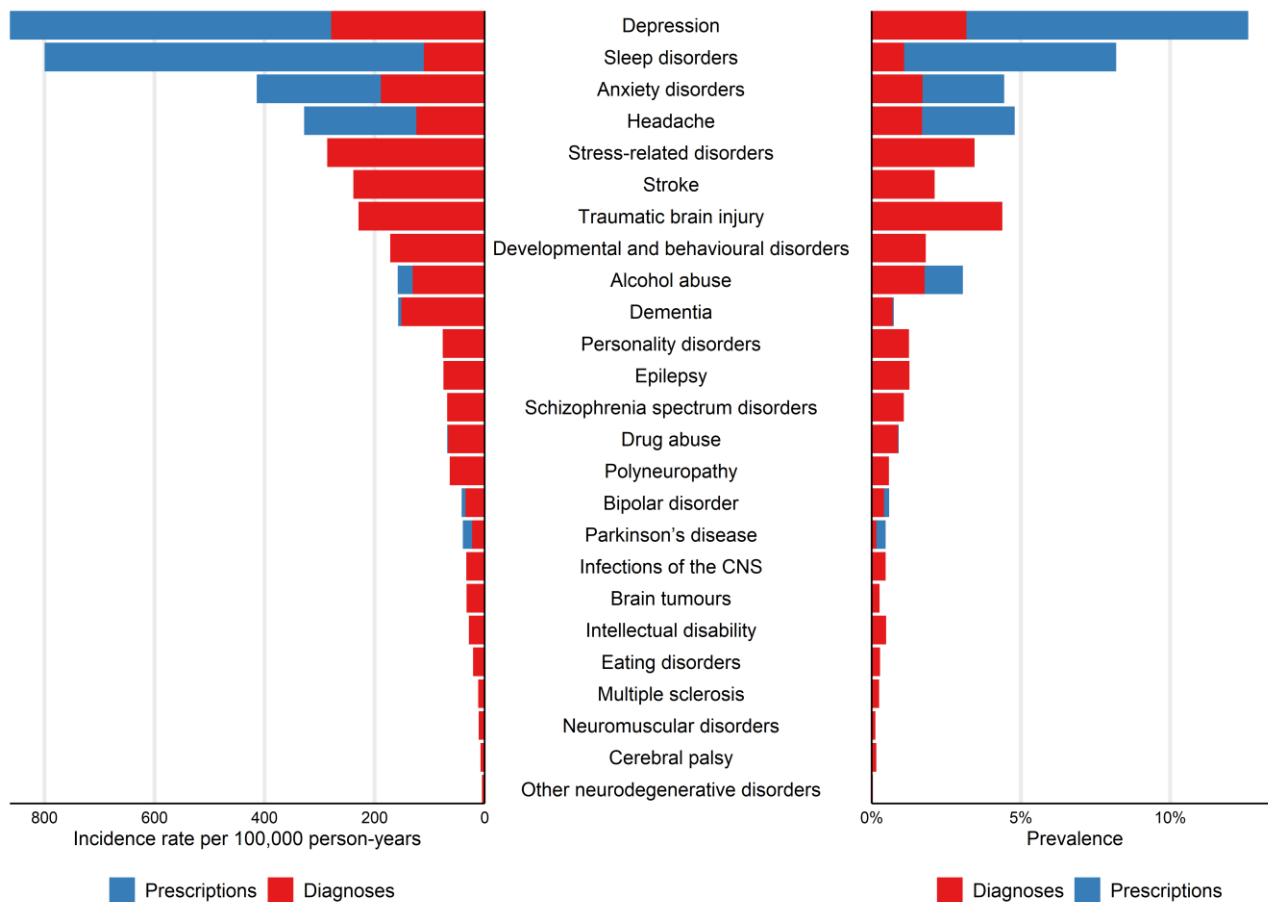

**Suppl. Figure 4. Occurrence of brain disorders in the Danish population including incidence during 2011-2015 and prevalence in 2015. Alcohol abuse, bipolar disorder, dementia, depression, drug abuse, headache, multiple sclerosis, Parkinson's disease, and sleep disorders were identified by either recorded hospital diagnoses or filled prescriptions of relevant medication, and all other brain disorders were identified by recorded hospital diagnoses.**

Abbreviations: CNS, central nervous system

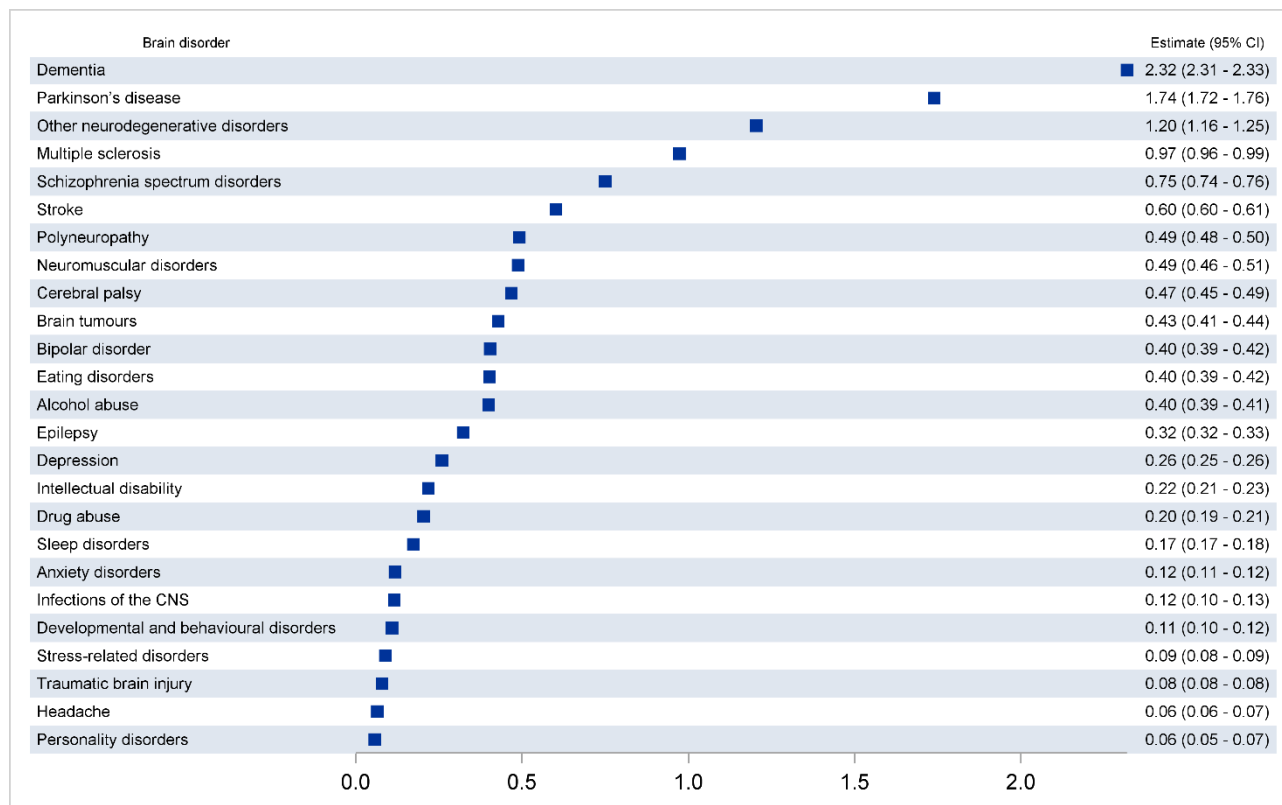

**Suppl. Figure 5. Costs in €10,000 associated with each of 25 groups of brain disorders adjusted for comorbid brain disorders in persons with prevalent brain disorders in Denmark in 2015 (2015 prices).**

Abbreviations: CI, confidence interval; CNS, central nervous system

## Supplementary references

1. Schmidt M, Schmidt SAJ, Adelborg K, et al. The Danish health care system and epidemiological research: from health care contacts to database records. *Clin Epidemiol* 2019;11:563-91. doi: 10.2147/clep.S179083
2. Schmidt M, Schmidt SA, Sandegaard JL, et al. The Danish National Patient Registry: a review of content, data quality, and research potential. *Clinical epidemiology* 2015;7:449-90. doi: 10.2147/CLEP.S91125 [doi]
3. Mors O, Perto GP, Mortensen PB. The Danish Psychiatric Central Research Register. *Scand J Public Health* 2011;39(7 Suppl):54-7. doi: 10.1177/1403494810395825
4. Ankjaer-Jensen A, Rosling P, Bilde L. Variable prospective financing in the Danish hospital sector and the development of a Danish case-mix system. *Health care management science* 2006;9(3):259-68.
5. Bilde L, Ankjaer-Jensen A, Danneskiold-Samsoe B. The "Health Benefit Basket" in Denmark: a description of entitlements, actors, and decision-making processes in the curative health sector. *Eur J Health Econ* 2005;Suppl:11-7. doi: 10.1007/s10198-005-0313-2
6. Pottegard A, Schmidt SAJ, Wallach-Kildemoes H, et al. Data Resource Profile: The Danish National Prescription Registry. *Int J Epidemiol* 2017;46(3):798-98f. doi: 10.1093/ije/dyw213
7. Statistics Denmark. Documentation of statistics [cited 2019 12/12]. Available from: <https://www.dst.dk/en/Statistik/dokumentation/documentationofstatistics> accessed 12 Dec 2019.

STROBE Statement—Checklist of items that should be included in reports of *cohort studies*

|                              | Item No | Recommendation                                                                                                                                                                                                                                                                                                                                                                                                |                                               |
|------------------------------|---------|---------------------------------------------------------------------------------------------------------------------------------------------------------------------------------------------------------------------------------------------------------------------------------------------------------------------------------------------------------------------------------------------------------------|-----------------------------------------------|
| <b>Title and abstract</b>    | 1       | (a) Indicate the study's design with a commonly used term in the title or the abstract<br>(b) Provide in the abstract an informative and balanced summary of what was done and what was found                                                                                                                                                                                                                 | title page<br>page 3                          |
| <b>Introduction</b>          |         |                                                                                                                                                                                                                                                                                                                                                                                                               |                                               |
| Background/rationale         | 2       | Explain the scientific background and rationale for the investigation being reported                                                                                                                                                                                                                                                                                                                          | page 6                                        |
| Objectives                   | 3       | State specific objectives, including any prespecified hypotheses                                                                                                                                                                                                                                                                                                                                              | page 6                                        |
| <b>Methods</b>               |         |                                                                                                                                                                                                                                                                                                                                                                                                               |                                               |
| Study design                 | 4       | Present key elements of study design early in the paper                                                                                                                                                                                                                                                                                                                                                       | page 7                                        |
| Setting                      | 5       | Describe the setting, locations, and relevant dates, including periods of recruitment, exposure, follow-up, and data collection                                                                                                                                                                                                                                                                               | page 7                                        |
| Participants                 | 6       | (a) Give the eligibility criteria, and the sources and methods of selection of participants. Describe methods of follow-up<br>(b) For matched studies, give matching criteria and number of exposed and unexposed                                                                                                                                                                                             | page 7<br>page 7                              |
| Variables                    | 7       | Clearly define all outcomes, exposures, predictors, potential confounders, and effect modifiers. Give diagnostic criteria, if applicable                                                                                                                                                                                                                                                                      | page 8-9                                      |
| Data sources/<br>measurement | 8*      | For each variable of interest, give sources of data and details of methods of assessment (measurement). Describe comparability of assessment methods if there is more than one group                                                                                                                                                                                                                          | page 8-9 +<br>Appendix 1                      |
| Bias                         | 9       | Describe any efforts to address potential sources of bias                                                                                                                                                                                                                                                                                                                                                     | page 10-11                                    |
| Study size                   | 10      | Explain how the study size was arrived at                                                                                                                                                                                                                                                                                                                                                                     | page 7                                        |
| Quantitative variables       | 11      | Explain how quantitative variables were handled in the analyses. If applicable, describe which groupings were chosen and why                                                                                                                                                                                                                                                                                  | page 8-9                                      |
| Statistical methods          | 12      | (a) Describe all statistical methods, including those used to control for confounding<br>(b) Describe any methods used to examine subgroups and interactions<br>(c) Explain how missing data were addressed<br>(d) If applicable, explain how loss to follow-up was addressed<br>(e) Describe any sensitivity analyses                                                                                        | page 9-10<br>page 9-10<br>NA<br>NA<br>page 10 |
| <b>Results</b>               |         |                                                                                                                                                                                                                                                                                                                                                                                                               |                                               |
| Participants                 | 13*     | (a) Report numbers of individuals at each stage of study—eg numbers potentially eligible, examined for eligibility, confirmed eligible, included in the study, completing follow-up, and analysed<br>(b) Give reasons for non-participation at each stage<br>(c) Consider use of a flow diagram                                                                                                               | page 11<br>NA<br>NA                           |
| Descriptive data             | 14*     | (a) Give characteristics of study participants (eg demographic, clinical, social) and information on exposures and potential confounders<br>(b) Indicate number of participants with missing data for each variable of interest<br>(c) Summarise follow-up time (eg, average and total amount)                                                                                                                | page 11+22<br>NA<br>-                         |
| Outcome data                 | 15*     | Report numbers of outcome events or summary measures over time                                                                                                                                                                                                                                                                                                                                                | page 11-12                                    |
| Main results                 | 16      | (a) Give unadjusted estimates and, if applicable, confounder-adjusted estimates and their precision (eg, 95% confidence interval). Make clear which confounders were adjusted for and why they were included<br>(b) Report category boundaries when continuous variables were categorized<br>(c) If relevant, consider translating estimates of relative risk into absolute risk for a meaningful time period | page 12<br>NA<br>NA                           |



|    |                          |    |                                                                                                                                                                            |            |
|----|--------------------------|----|----------------------------------------------------------------------------------------------------------------------------------------------------------------------------|------------|
| 1  | Other analyses           | 17 | Report other analyses done—eg analyses of subgroups and interactions, and sensitivity analyses                                                                             | page 13    |
| 2  |                          |    |                                                                                                                                                                            |            |
| 3  |                          |    |                                                                                                                                                                            |            |
| 4  | <b>Discussion</b>        |    |                                                                                                                                                                            |            |
| 5  | Key results              | 18 | Summarise key results with reference to study objectives                                                                                                                   | page 13-14 |
| 6  | Limitations              | 19 | Discuss limitations of the study, taking into account sources of potential bias or imprecision. Discuss both direction and magnitude of any potential bias                 | page 14-15 |
| 7  |                          |    |                                                                                                                                                                            |            |
| 8  |                          |    |                                                                                                                                                                            |            |
| 9  | Interpretation           | 20 | Give a cautious overall interpretation of results considering objectives, limitations, multiplicity of analyses, results from similar studies, and other relevant evidence | page 15-16 |
| 10 |                          |    |                                                                                                                                                                            |            |
| 11 | Generalisability         | 21 | Discuss the generalisability (external validity) of the study results                                                                                                      | page 15-16 |
| 12 |                          |    |                                                                                                                                                                            |            |
| 13 | <b>Other information</b> |    |                                                                                                                                                                            |            |
| 14 | Funding                  | 22 | Give the source of funding and the role of the funders for the present study and, if applicable, for the original study on which the present article is based              | page 17    |
| 15 |                          |    |                                                                                                                                                                            |            |
| 16 |                          |    |                                                                                                                                                                            |            |

\*Give information separately for exposed and unexposed groups.

**Note:** An Explanation and Elaboration article discusses each checklist item and gives methodological background and published examples of transparent reporting. The STROBE checklist is best used in conjunction with this article (freely available on the Web sites of PLoS Medicine at <http://www.plosmedicine.org/>, Annals of Internal Medicine at <http://www.annals.org/>, and Epidemiology at <http://www.epidem.com/>). Information on the STROBE Initiative is available at <http://www.strobe-statement.org>.
