# Supplementary material for: Occurrence, mortality and cost of brain disorders in Denmark: a population-based cohort study
Source: PubMed Central journal article supplement — BMJ Open. 2020 Nov 17;10(11):e037564. doi: 10.1136/bmjopen-2020-037564 (PMC7674107; doi:10.1136/bmjopen-2020-037564), 2020-11-17
Supplement: bmjopen-2020-037564supp001.pdf [file bmjopen-2020-037564supp001.pdf]

## APPENDIX 1 – DATA SOURCES

From the Danish Civil Registration System (DCRS), we obtained personal identification numbers (*i.e.*, CPR-numbers, a unique 10-digit number for every Danish citizen given at birth or immigration) to identify individuals across the nationwide registries in both the healthcare and socioeconomic systems. Also, the DCRS holds information on date of birth, sex, vital status, and place of living, of every person in Denmark.<sup>1</sup>

The Danish National Patient Registry (DNPR) holds information on all in- and outpatient hospital contacts since 1995, with details about date of admission and discharge, procedures and operations, and one or more discharge diagnoses.<sup>2</sup> Similarly, all contacts to psychiatric hospitals are recorded in the Danish Psychiatric Central Research Registry, which since 1995 has been included in the DNPR. The discharge diagnoses are recorded using the International Classification of Diseases, Tenth Revision (ICD-10).<sup>3</sup> For every hospital contact, the accumulated costs of the services provided are reimbursed to the hospital department using national reimbursement rates/tariffs based on average costs of the services. Diagnosis-related group (DRG) tariffs are used for inpatient contacts and Danish Ambulatory Grouping System (DAGS) tariffs for outpatient contacts.<sup>4</sup>

The Danish Health Service Registry (DHSR) contains information on services provided by health contractors in primary health care covered by the national health services during consultations, telephone consultations, and home visits. Services are recorded from a wide range of health contractors such as general practitioners, dentists, physiotherapists, chiropodists, chiropractors, psychologists, and other specialists. Every service recorded in the DHSR is accompanied with a corresponding tariff used when the counties reimburse services to the health contractor.<sup>5</sup>

The Danish National Prescription Registry includes nationwide data on all prescriptions filled at outpatient pharmacies since 1995, *e.g.*, drug type, number of packages, package size, and price. Since 2004, indication of prescriptions are recorded, but with missing indication in one third of prescriptions filled. Drug types are classified according to the Anatomical Therapeutic Chemical (ATC) classification system.<sup>6</sup>

Finally, Statistics Denmark hosts registries with information on every Danish resident on whether the person lives in an elderly home or nursery home, on exact time spent by public home help in private households (in hours), and on personal income before taxes.<sup>7</sup> Data on rehabilitation provided by municipalities were not available in any nationwide registry and therefore not included in our analyses.

## APPENDIX 2 – CODE BOOKS

### ICD-10 and ATC codes

In the main analyses, brain disorders were defined by the “Included diagnosis codes” excluding the codes in “Excluded diagnosis codes”. In the sensitivity analyses, brain disorders were defined by either “Included diagnosis codes” excluding the codes in “Excluded diagnosis codes” or by filled prescriptions including “Included ATC codes”. For The Anatomical Therapeutic Chemical (ATC) codes, if any indication codes are given, only prescriptions with those ATC and indication codes were used. Diagnosis codes are given as International Classification of Diseases, Tenth Revision (ICD-10) codes. For both ICD-10 and ATC codes, all subcodes were included.

| Brain disorder                           | Included diagnosis codes                                                                                   | Excluded diagnosis codes | Included ATC codes               | Included indication codes |
|------------------------------------------|------------------------------------------------------------------------------------------------------------|--------------------------|----------------------------------|---------------------------|
| Any brain disorder                       |                                                                                                            |                          |                                  |                           |
| Alcohol abuse                            | F10 E244 G312 G621 G721 I426 K292 K70 K852 K860 Q860                                                       | F100                     | V03AA<br>N07BB                   |                           |
| Anxiety disorders                        | F40 F41 F42                                                                                                |                          | N06A                             | 371 830 163               |
| Bipolar disorder                         | F30 F31                                                                                                    |                          | N05AN01                          |                           |
| Brain tumours                            | C70 C71 C72 D32 D33 D42 D43                                                                                |                          |                                  |                           |
| Cerebral palsy                           | G80                                                                                                        |                          |                                  |                           |
| Dementia                                 | F00 F01 F02 F03 G30 G310B G311 G318 G319                                                                   |                          | N06D                             | 330 331 329 838           |
| Depression                               | F32 F33                                                                                                    |                          | N06A                             | 168 270                   |
| Developmental and behavioural disorders  | F84 F9                                                                                                     | F99                      |                                  |                           |
| Drug abuse                               | F1                                                                                                         | F10 F17                  | N07BC01<br>N07BC51               |                           |
| Eating disorders                         | F500 F501 F502 F503                                                                                        |                          |                                  |                           |
| Epilepsy                                 | G40                                                                                                        |                          |                                  |                           |
| Headache                                 | G43 G44                                                                                                    |                          | N02C                             | 56 269 153                |
| Infections of the central nervous system | G0 A17 A321 A327 A390 A521 A522 A523 A692 A83 A84 A85 A87 A89 B003 B004 B010 B011 B020 B021 B582 B451 B375 | G08 G09                  |                                  |                           |
| Intellectual disability                  | F7 Q90 Q992                                                                                                |                          |                                  |                           |
| Multiple sclerosis                       | G35                                                                                                        |                          |                                  |                           |
| Neuromuscular disorders                  | G70 G71 G72 G73                                                                                            |                          |                                  |                           |
| Other neurodegenerative disorders        | G10 G11 G122G G13 G14                                                                                      | G130 G139                |                                  |                           |
| Parkinson’s disease                      | G20 G23                                                                                                    |                          | N04BA<br>N04BB<br>N04BD<br>N04BX |                           |
| Personality disorders                    | F60                                                                                                        |                          |                                  |                           |
| Polyneuropathy                           | G60 G61 G62 G63 G64 G130                                                                                   |                          |                                  |                           |
| Schizophrenia spectrum disorders         | F2                                                                                                         |                          |                                  |                           |
| Sleep disorders                          | F51 G470 G471 G473 G474                                                                                    |                          | N05CF01<br>N05CH01               | 372 165 166 373<br>170    |
| Stress-related disorders                 | F43                                                                                                        |                          |                                  |                           |
| Stroke                                   | I60 I61 I63 I64                                                                                            | I608                     |                                  |                           |
| Traumatic brain injury                   | S020 S021 S027 S029 S06                                                                                    |                          |                                  |                           |

### Charlson Comorbidity Index (CCI)

The codes included were used to identify comorbidity in persons with brain disorders and their comparisons. Persons were considered having the specific type of comorbidity when having at least one of the listed discharge diagnosis codes (including all subcodes) recorded in the Danish National Patient Registry up to 10 years before index date.

| CCI disease                       | Included ICD-8 and ICD-10 diagnosis codes                                                                                                                       |
|-----------------------------------|-----------------------------------------------------------------------------------------------------------------------------------------------------------------|
| Myocardial infarction             | 410 DI21 DI22 DI23                                                                                                                                              |
| Congestive heart failure          | 42709 42710 42711 42719 42899 78249 DI50 DI110 DI130 DI132                                                                                                      |
| Peripheral vascular disease       | 440 441 442 443 444 445 DI70 DI71 DI72 DI73 DI74 DI77                                                                                                           |
| Cerebrovascular disease           | 430 431 432 433 434 435 436 437 438 DI6 DG45 DG46                                                                                                               |
| Dementia                          | 29009 2901 29309 DF00 DF01 DF02 DF03 DF051 DG30                                                                                                                 |
| Chronic pulmonary disease         | 490 491 492 493 515 516 517 518 DJ40 DJ41 DJ42 DJ43 DJ44 DJ45 DJ46 DJ47 DJ60 DJ61 DJ62 DJ63 DJ64 DJ65 DJ66 DJ67 DJ684 DJ701 DJ703 DJ841 DJ920 DJ961 DJ982 DJ983 |
| Connective tissue disease         | 712 716 734 446 13599 DM05 DM06 DM08 DM09 DM30 DM31 DM32 DM33 DM34 DM35 DM36 DD86                                                                               |
| Ulcer disease                     | 53091 53098 531 532 533 534 DK221 DK25 DK26 DK27 DK28                                                                                                           |
| Mild liver disease                | 571 57301 57304 DB18 DK700 DK701 DK702 DK703 DK709 DK71 DK73 DK74 DK760                                                                                         |
| Diabetes without end-organ damage | 24900 24906 24907 24909 25000 25006 25007 25009 DE100 DE101 DE109 DE110 DE111 DE119                                                                             |
| Hemiplegia                        | 344 DG81 DG82                                                                                                                                                   |
| Moderate to severe renal disease  | 403 404 580 581 582 583 584 59009 59319 7531 792 DI12 DI13 DN00 DN01 DN02 DN03 DN04 DN05 DN07 DN11 DN14 DN17 DN18 DN19 DQ61                                     |
| Diabetes with end-organ damage    | 24901 24902 24903 24904 24905 24908 25001 25002 25003 25004 25005 25008 DE102 DE103 DE104 DE105 DE106 DE107 DE108 DE112 DE113 DE114 DE115 DE116 DE117 DE118     |
| Solid cancer tumour               | 14 15 16 17 18 190 191 192 193 194 DC0 DC1 DC2 DC3 DC4 DC5 DC6 DC70 DC71 DC72 DC73 DC74 DC75                                                                    |
| Leukaemia                         | 204 205 206 207 DC91 DC92 DC93 DC94 DC95                                                                                                                        |
| Lymphoma                          | 200 201 202 203 27559 DC81 DC82 DC83 DC84 DC85 DC88 DC90 DC96                                                                                                   |
| Moderate to severe liver disease  | 07000 07002 07004 07006 07008 57300 4560 DB150 DB160 DB162 DB190 DK704 DK72 DK766 DI85                                                                          |
| Metastatic solid tumour           | 195 196 197 198 199 DC76 DC77 DC78 DC79 DC80                                                                                                                    |
| AIDS                              | 07983 DB21 DB22 DB23 DB24                                                                                                                                       |

## Supplementary tables

Suppl. Table 1. Characteristics of patients with prevalent disorders in Denmark in 2015 sorted in alphabetical order.

| Disease group                            | Prevalent cohorts: 2015 |                |                     |                |                 |                |
|------------------------------------------|-------------------------|----------------|---------------------|----------------|-----------------|----------------|
|                                          | Persons, N              | Men, N (%)     | Age, median (Q1-Q3) | CCI: 0, N (%)  | CCI: 1-2, N (%) | CCI: +3, N (%) |
| Any brain disorder                       | 1,075,081               | 536,462 (49.9) | 46.0 (27.5-63.6)    | 788,948 (73.4) | 222,453 (20.7)  | 63,680 (5.9)   |
| Alcohol abuse                            | 101,066                 | 67,376 (66.7)  | 56.5 (46.2-65.8)    | 59,961 (59.3)  | 28,397 (28.1)   | 12,708 (12.6)  |
| Anxiety disorders                        | 96,943                  | 33,768 (34.8)  | 41.2 (28.8-54.3)    | 78,009 (80.5)  | 15,181 (15.7)   | 3,753 (3.9)    |
| Bipolar disorder                         | 23,364                  | 9,366 (40.1)   | 52.4 (39.3-64.9)    | 17,127 (73.3)  | 4,851 (20.8)    | 1,386 (5.9)    |
| Brain tumours                            | 14,953                  | 6,101 (40.8)   | 62.6 (48.6-71.9)    | 8,718 (58.3)   | 4,339 (29.0)    | 1,896 (12.7)   |
| Cerebral palsy                           | 9,083                   | 5,093 (56.1)   | 22.3 (14.1-37.0)    | 6,516 (71.7)   | 2,092 (23.0)    | 475 (5.2)      |
| Dementia                                 | 40,037                  | 15,645 (39.1)  | 81.7 (73.9-87.5)    | 8,340 (20.8)   | 22,655 (56.6)   | 9,042 (22.6)   |
| Depression                               | 180,886                 | 64,191 (35.5)  | 49.0 (35.6-64.1)    | 130,862 (72.3) | 38,342 (21.2)   | 11,682 (6.5)   |
| Developmental and behavioural disorders  | 103,157                 | 68,589 (66.5)  | 19.6 (14.2-26.0)    | 94,745 (91.8)  | 7,841 (7.6)     | 571 (0.6)      |
| Drug abuse                               | 50,066                  | 32,295 (64.5)  | 38.6 (28.4-50.8)    | 38,657 (77.2)  | 9,180 (18.3)    | 2,229 (4.5)    |
| Eating disorders                         | 15,936                  | 750 (4.7)      | 29.5 (23.0-36.9)    | 14,484 (90.9)  | 1,332 (8.4)     | 120 (0.8)      |
| Epilepsy                                 | 72,205                  | 37,047 (51.3)  | 43.5 (24.8-62.1)    | 51,701 (71.6)  | 15,562 (21.6)   | 4,942 (6.8)    |
| Headache                                 | 96,252                  | 32,218 (33.5)  | 45.4 (31.2-57.6)    | 75,439 (78.4)  | 17,566 (18.3)   | 3,247 (3.4)    |
| Infections of the central nervous system | 26,829                  | 14,069 (52.4)  | 43.1 (22.9-61.5)    | 20,740 (77.3)  | 4,709 (17.6)    | 1,380 (5.1)    |
| Intellectual disability                  | 27,605                  | 16,087 (58.3)  | 25.4 (17.1-45.1)    | 23,577 (85.4)  | 3,501 (12.7)    | 527 (1.9)      |
| Multiple sclerosis                       | 14,264                  | 4,431 (31.1)   | 52.6 (42.9-62.7)    | 11,206 (78.6)  | 2,559 (17.9)    | 499 (3.5)      |
| Neuromuscular disorders                  | 7,080                   | 3,649 (51.5)   | 51.4 (33.3-66.5)    | 4,427 (62.5)   | 1,992 (28.1)    | 661 (9.3)      |
| Other neurodegenerative disorders        | 2,192                   | 1,143 (52.1)   | 59.9 (46.2-70.5)    | 1,381 (63.0)   | 622 (28.4)      | 189 (8.6)      |
| Parkinson's disease                      | 8,942                   | 5,083 (56.8)   | 75.3 (68.4-81.4)    | 4,430 (49.5)   | 3,323 (37.2)    | 1,189 (13.3)   |
| Personality disorders                    | 71,334                  | 24,517 (34.4)  | 39.9 (30.6-51.0)    | 58,516 (82.0)  | 10,824 (15.2)   | 1,994 (2.8)    |
| Polyneuropathy                           | 32,710                  | 18,918 (57.8)  | 66.7 (55.0-75.8)    | 15,900 (48.6)  | 11,139 (34.1)   | 5,671 (17.3)   |
| Schizophrenia spectrum disorders         | 61,346                  | 32,637 (53.2)  | 45.1 (32.1-57.7)    | 48,640 (79.3)  | 10,276 (16.8)   | 2,430 (4.0)    |
| Sleep disorders                          | 61,666                  | 45,042 (73.0)  | 55.9 (43.0-66.2)    | 41,909 (68.0)  | 15,223 (24.7)   | 4,534 (7.4)    |
| Stress-related disorders                 | 196,291                 | 77,494 (39.5)  | 42.3 (29.3-54.1)    | 158,789 (80.9) | 31,138 (15.9)   | 6,364 (3.2)    |
| Stroke                                   | 120,065                 | 64,067 (53.4)  | 71.0 (61.1-79.9)    | 23,651 (19.7)  | 70,389 (58.6)   | 26,025 (21.7)  |
| Traumatic brain injury                   | 249,348                 | 142,776 (57.3) | 34.9 (22.1-53.4)    | 207,314 (83.1) | 34,162 (13.7)   | 7,872 (3.2)    |

Abbreviations: Q, quartile; CCI, Charlson Comorbidity Index.

**Suppl. Table 2. Characteristics of patients with incident brain disorders in Denmark during 2011-2015 sorted in alphabetical order.**

| Disease group                            | Incident cohorts: 2011-2015 |                |                     |                |                 |                |
|------------------------------------------|-----------------------------|----------------|---------------------|----------------|-----------------|----------------|
|                                          | Persons, N                  | Men, N (%)     | Age, median (Q1-Q3) | CCI: 0, N (%)  | CCI: 1-2, N (%) | CCI: +3, N (%) |
| Any brain disorder                       | 381,759                     | 187,780 (49.2) | 46.6 (21.5-68.9)    | 295,560 (77.4) | 64,746 (17.0)   | 21,453 (5.6)   |
| Alcohol abuse                            | 37,032                      | 25,251 (68.2)  | 55.8 (42.7-66.8)    | 25,797 (69.7)  | 8,347 (22.5)    | 2,888 (7.8)    |
| Anxiety disorders                        | 53,350                      | 20,013 (37.5)  | 35.8 (22.3-56.5)    | 39,034 (73.2)  | 8,480 (15.9)    | 5,836 (10.9)   |
| Bipolar disorder                         | 9,838                       | 4,074 (41.4)   | 40.8 (28.5-55.0)    | 7,951 (80.8)   | 1,500 (15.2)    | 387 (3.9)      |
| Brain tumours                            | 9,336                       | 4,199 (45.0)   | 64.1 (50.7-72.9)    | 6,044 (64.7)   | 2,227 (23.9)    | 1,065 (11.4)   |
| Cerebral palsy                           | 2,145                       | 1,199 (55.9)   | 13.7 (3.1-54.3)     | 1,371 (63.9)   | 582 (27.1)      | 192 (9.0)      |
| Dementia                                 | 42,798                      | 17,454 (40.8)  | 81.8 (75.4-87.0)    | 21,015 (49.1)  | 15,686 (36.7)   | 6,097 (14.2)   |
| Depression                               | 78,926                      | 29,379 (37.2)  | 45.4 (27.9-66.8)    | 56,768 (71.9)  | 15,445 (19.6)   | 6,713 (8.5)    |
| Developmental and behavioural disorders  | 48,562                      | 29,864 (61.5)  | 14.1 (8.6-21.9)     | 43,747 (90.1)  | 4,445 (9.2)     | 370 (0.8)      |
| Drug abuse                               | 18,843                      | 12,469 (66.2)  | 26.9 (20.7-42.3)    | 15,944 (84.6)  | 2,322 (12.3)    | 577 (3.1)      |
| Eating disorders                         | 6,011                       | 321 (5.3)      | 19.7 (16.0-24.9)    | 5,683 (94.5)   | 307 (5.1)       | 21 (0.3)       |
| Epilepsy                                 | 21,255                      | 11,301 (53.2)  | 53.2 (21.1-70.6)    | 12,057 (56.7)  | 6,319 (29.7)    | 2,879 (13.5)   |
| Headache                                 | 35,180                      | 11,547 (32.8)  | 37.6 (23.4-50.4)    | 29,066 (82.6)  | 5,292 (15.0)    | 822 (2.3)      |
| Infections of the central nervous system | 9,501                       | 4,922 (51.8)   | 44.6 (21.9-64.2)    | 7,086 (74.6)   | 1,727 (18.2)    | 688 (7.2)      |
| Intellectual disability                  | 8,166                       | 4,692 (57.5)   | 17.3 (9.9-34.8)     | 7,035 (86.1)   | 994 (12.2)      | 137 (1.7)      |
| Multiple sclerosis                       | 3,345                       | 1,070 (32.0)   | 41.7 (31.9-52.0)    | 2,833 (84.7)   | 449 (13.4)      | 63 (1.9)       |
| Neuromuscular disorders                  | 3,062                       | 1,596 (52.1)   | 52.8 (32.9-67.8)    | 1,950 (63.7)   | 803 (26.2)      | 309 (10.1)     |
| Other neurodegenerative disorders        | 1,464                       | 777 (53.1)     | 65.3 (53.1-73.2)    | 904 (61.7)     | 425 (29.0)      | 135 (9.2)      |
| Parkinson's disease                      | 6,478                       | 3,883 (59.9)   | 75.5 (68.9-81.4)    | 3,459 (53.4)   | 2,236 (34.5)    | 783 (12.1)     |
| Personality disorders                    | 21,556                      | 6,762 (31.4)   | 27.2 (21.3-38.6)    | 19,265 (89.4)  | 2,030 (9.4)     | 261 (1.2)      |
| Polyneuropathy                           | 17,925                      | 10,755 (60.0)  | 65.9 (54.5-75.0)    | 8,825 (49.2)   | 6,108 (34.1)    | 2,992 (16.7)   |
| Schizophrenia spectrum disorders         | 19,316                      | 10,219 (52.9)  | 29.7 (21.1-48.9)    | 16,209 (83.9)  | 2,483 (12.9)    | 624 (3.2)      |
| Sleep disorders                          | 31,316                      | 21,769 (69.5)  | 51.9 (38.5-62.7)    | 21,974 (70.2)  | 7,086 (22.6)    | 2,256 (7.2)    |
| Stress-related disorders                 | 80,953                      | 34,110 (42.1)  | 34.5 (20.5-48.5)    | 68,431 (84.5)  | 10,356 (12.8)   | 2,166 (2.7)    |
| Stroke                                   | 67,539                      | 35,308 (52.3)  | 71.8 (61.1-81.3)    | 37,862 (56.1)  | 21,220 (31.4)   | 8,457 (12.5)   |
| Traumatic brain injury                   | 64,931                      | 35,456 (54.6)  | 34.3 (15.7-63.4)    | 50,924 (78.4)  | 10,610 (16.3)   | 3,397 (5.2)    |

Abbreviations: Q, quartile; CCI, Charlson Comorbidity Index.

**Suppl. Table 3. Occurrence of hospital-diagnosed brain disorders in the Danish population including incidence during 2011-2015 and prevalence in 2015 sorted in alphabetical order.**

| Disease group                            | Prevalent cohorts: 2015 |                                         | Incident cohorts: 2011-2015 |                                                  |
|------------------------------------------|-------------------------|-----------------------------------------|-----------------------------|--------------------------------------------------|
|                                          | Prevalence, N (%)       | Prevalence per 100,000 persons (95% CI) | Incidence, N                | Incidence rate per 100,000 person-years (95% CI) |
| Any brain disorder                       | 1,075,081 (18.9)        | 18,879 (18,844-18,915)                  | 381,759                     | 1,349 (1,345-1,353)                              |
| Alcohol abuse                            | 101,066 (1.8)           | 1,775 (1,764-1,786)                     | 37,032                      | 131 (130-132)                                    |
| Anxiety disorders                        | 96,943 (1.7)            | 1,702 (1,692-1,713)                     | 53,350                      | 189 (187-190)                                    |
| Bipolar disorder                         | 23,364 (0.4)            | 410 (405-416)                           | 9,838                       | 35 (34-35)                                       |
| Brain tumours                            | 14,953 (0.3)            | 263 (258-267)                           | 9,336                       | 33 (32-34)                                       |
| Cerebral palsy                           | 9,083 (0.2)             | 160 (156-163)                           | 2,145                       | 8 (7-8)                                          |
| Dementia                                 | 40,037 (0.7)            | 703 (696-710)                           | 42,798                      | 151 (150-153)                                    |
| Depression                               | 180,886 (3.2)           | 3,176 (3,162-3,191)                     | 78,926                      | 279 (277-281)                                    |
| Developmental and behavioural disorders  | 103,157 (1.8)           | 1,812 (1,800-1,823)                     | 48,562                      | 172 (170-173)                                    |
| Drug abuse                               | 50,066 (0.9)            | 879 (872-887)                           | 18,843                      | 67 (66-68)                                       |
| Eating disorders                         | 15,936 (0.3)            | 280 (276-284)                           | 6,011                       | 21 (21-22)                                       |
| Epilepsy                                 | 72,205 (1.3)            | 1,268 (1,259-1,277)                     | 21,255                      | 75 (74-76)                                       |
| Headache                                 | 96,252 (1.7)            | 1,690 (1,680-1,701)                     | 35,180                      | 124 (123-126)                                    |
| Infections of the central nervous system | 26,829 (0.5)            | 471 (466-477)                           | 9,501                       | 34 (33-34)                                       |
| Intellectual disability                  | 27,605 (0.5)            | 485 (479-491)                           | 8,166                       | 29 (28-29)                                       |
| Multiple sclerosis                       | 14,264 (0.3)            | 250 (246-255)                           | 3,345                       | 12 (11-12)                                       |
| Neuromuscular disorders                  | 7,080 (0.1)             | 124 (121-127)                           | 3,062                       | 11 (10-11)                                       |
| Other neurodegenerative disorders        | 2,192 (0.0)             | 38 (37-40)                              | 1,464                       | 5 (5-5)                                          |
| Parkinson's disease                      | 8,942 (0.2)             | 157 (154-160)                           | 6,478                       | 23 (22-23)                                       |
| Personality disorders                    | 71,334 (1.3)            | 1,253 (1,244-1,262)                     | 21,556                      | 76 (75-77)                                       |
| Polyneuropathy                           | 32,710 (0.6)            | 574 (568-581)                           | 17,925                      | 63 (62-64)                                       |
| Schizophrenia spectrum disorders         | 61,346 (1.1)            | 1,077 (1,069-1,086)                     | 19,316                      | 68 (67-69)                                       |
| Sleep disorders                          | 61,666 (1.1)            | 1,083 (1,074-1,091)                     | 31,316                      | 111 (109-112)                                    |
| Stress-related disorders                 | 196,291 (3.4)           | 3,447 (3,432-3,462)                     | 80,953                      | 286 (284-288)                                    |
| Stroke                                   | 120,065 (2.1)           | 2,108 (2,097-2,120)                     | 67,539                      | 239 (237-240)                                    |
| Traumatic brain injury                   | 249,348 (4.4)           | 4,379 (4,362-4,396)                     | 64,931                      | 229 (228-231)                                    |

Abbreviations: CI, confidence interval.

**Suppl. Table 4. Actual and attributable costs in total and per person in persons with prevalent brain disorders in 2015, and incident brain disorders during 2011-2015 sorted in alphabetical order and stratified by cost components.**

| Brain disorder     | Cost component                         | Prevalent cohort - 2015    |                                       |                                  |                                             | Incident cohort - 2011-2015                                           |
|--------------------|----------------------------------------|----------------------------|---------------------------------------|----------------------------------|---------------------------------------------|-----------------------------------------------------------------------|
|                    |                                        | Actual costs in 2015 (EUR) | Actual costs per person in 2015 (EUR) | Attributable costs in 2015 (EUR) | Attributable costs per person in 2015 (EUR) | Attributable costs per person in the first year after diagnosis (EUR) |
| Any brain disorder | Primary sector                         | 488,168,143                | 460                                   | 191,774,339                      | 181                                         | 175                                                                   |
|                    | Secondary sector - Outpatient          | 1,491,081,458              | 1,406                                 | 743,338,257                      | 701                                         | 2,702                                                                 |
|                    | Secondary sector - Inpatient           | 2,522,910,114              | 2,379                                 | 1,638,312,025                    | 1,545                                       | 8,457                                                                 |
|                    | Filled prescriptions                   | 533,852,195                | 503                                   | 319,922,005                      | 302                                         | 211                                                                   |
|                    | Home care                              | 700,068,647                | 660                                   | 529,492,180                      | 499                                         | 489                                                                   |
|                    | Nursing home / sheltered accommodation | 2,138,655,226              | 2,017                                 | 1,786,588,544                    | 1,685                                       | 749                                                                   |
|                    | Total cost (excl. lost productivity)   | 7,874,735,782              | 7,426                                 | 5,209,427,352                    | 4,912                                       | 12,783                                                                |
| Alcohol abuse      | Primary sector                         | 43,832,697                 | 444                                   | 10,708,496                       | 109                                         | 164                                                                   |
|                    | Secondary sector - Outpatient          | 182,619,411                | 1,851                                 | 90,265,391                       | 915                                         | 2,318                                                                 |
|                    | Secondary sector - Inpatient           | 509,785,016                | 5,166                                 | 396,078,314                      | 4,014                                       | 14,252                                                                |
|                    | Filled prescriptions                   | 70,574,116                 | 715                                   | 41,364,956                       | 419                                         | 329                                                                   |
|                    | Home care                              | 86,902,799                 | 881                                   | 69,319,977                       | 703                                         | 686                                                                   |
|                    | Nursing home / sheltered accommodation | 272,375,227                | 2,760                                 | 235,944,141                      | 2,391                                       | 1,019                                                                 |
|                    | Total cost (excl. lost productivity)   | 1,166,089,265              | 11,817                                | 843,681,275                      | 8,550                                       | 18,768                                                                |
| Anxiety disorders  | Primary sector                         | 46,880,525                 | 488                                   | 17,760,012                       | 185                                         | 270                                                                   |
|                    | Secondary sector - Outpatient          | 186,143,973                | 1,939                                 | 112,251,855                      | 1,169                                       | 4,937                                                                 |
|                    | Secondary sector - Inpatient           | 304,572,473                | 3,172                                 | 220,690,805                      | 2,298                                       | 8,872                                                                 |
|                    | Filled prescriptions                   | 58,721,973                 | 612                                   | 38,187,658                       | 398                                         | 502                                                                   |
|                    | Home care                              | 32,889,132                 | 343                                   | 20,728,003                       | 216                                         | 359                                                                   |
|                    | Nursing home / sheltered accommodation | 93,491,816                 | 974                                   | 63,280,196                       | 659                                         | 368                                                                   |
|                    | Total cost (excl. lost productivity)   | 722,699,890                | 7,527                                 | 472,898,530                      | 4,925                                       | 15,308                                                                |
| Bipolar disorder   | Primary sector                         | 12,927,768                 | 561                                   | 4,802,917                        | 209                                         | 227                                                                   |
|                    | Secondary sector - Outpatient          | 68,871,491                 | 2,990                                 | 47,030,959                       | 2,042                                       | 6,368                                                                 |
|                    | Secondary sector - Inpatient           | 147,299,161                | 6,395                                 | 120,588,736                      | 5,235                                       | 17,468                                                                |
|                    | Filled prescriptions                   | 23,251,036                 | 1,009                                 | 16,487,361                       | 716                                         | 755                                                                   |
|                    | Home care                              | 17,966,005                 | 780                                   | 12,684,093                       | 551                                         | 299                                                                   |
|                    | Nursing home / sheltered accommodation | 65,937,773                 | 2,863                                 | 52,520,523                       | 2,280                                       | 680                                                                   |
|                    | Total cost (excl. lost productivity)   | 336,253,233                | 14,598                                | 254,114,589                      | 11,032                                      | 25,797                                                                |
| Brain tumours      | Primary sector                         | 9,283,859                  | 640                                   | 3,508,912                        | 242                                         | 223                                                                   |
|                    | Secondary sector - Outpatient          | 42,180,950                 | 2,910                                 | 26,480,502                       | 1,827                                       | 12,604                                                                |



| Brain disorder                          | Cost component                         | Prevalent cohort - 2015    |                                       |                                  |                                             | Incident cohort - 2011-2015                                           |
|-----------------------------------------|----------------------------------------|----------------------------|---------------------------------------|----------------------------------|---------------------------------------------|-----------------------------------------------------------------------|
|                                         |                                        | Actual costs in 2015 (EUR) | Actual costs per person in 2015 (EUR) | Attributable costs in 2015 (EUR) | Attributable costs per person in 2015 (EUR) | Attributable costs per person in the first year after diagnosis (EUR) |
|                                         | Secondary sector - Inpatient           | 57,321,123                 | 3,954                                 | 36,118,409                       | 2,492                                       | 29,223                                                                |
|                                         | Filled prescriptions                   | 8,861,608                  | 611                                   | 3,527,159                        | 243                                         | 295                                                                   |
|                                         | Home care                              | 16,473,487                 | 1,136                                 | 10,430,046                       | 720                                         | 901                                                                   |
|                                         | Nursing home / sheltered accommodation | 31,261,211                 | 2,157                                 | 14,864,894                       | 1,025                                       | 302                                                                   |
|                                         | Total cost (excl. lost productivity)   | 165,382,238                | 11,409                                | 94,929,922                       | 6,549                                       | 43,548                                                                |
| Cerebral palsy                          | Primary sector                         | 13,167,622                 | 1,462                                 | 11,318,548                       | 1,256                                       | 960                                                                   |
|                                         | Secondary sector - Outpatient          | 11,430,545                 | 1,269                                 | 6,723,166                        | 746                                         | 2,731                                                                 |
|                                         | Secondary sector - Inpatient           | 27,487,812                 | 3,051                                 | 21,438,091                       | 2,380                                       | 11,838                                                                |
|                                         | Filled prescriptions                   | 6,630,687                  | 736                                   | 5,437,246                        | 604                                         | 567                                                                   |
|                                         | Home care                              | 13,763,599                 | 1,528                                 | 13,328,070                       | 1,479                                       | 2,111                                                                 |
|                                         | Nursing home / sheltered accommodation | 11,864,848                 | 1,317                                 | 10,870,651                       | 1,207                                       | 3,193                                                                 |
|                                         | Total cost (excl. lost productivity)   | 84,345,114                 | 9,363                                 | 69,115,771                       | 7,672                                       | 21,400                                                                |
| Dementia                                | Primary sector                         | 24,098,562                 | 667                                   | 4,596,178                        | 127                                         | 137                                                                   |
|                                         | Secondary sector - Outpatient          | 43,138,878                 | 1,193                                 | -5,214,136                       | -144                                        | 1,567                                                                 |
|                                         | Secondary sector - Inpatient           | 140,689,111                | 3,891                                 | 46,270,459                       | 1,280                                       | 6,237                                                                 |
|                                         | Filled prescriptions                   | 35,544,655                 | 983                                   | 14,366,512                       | 397                                         | 458                                                                   |
|                                         | Home care                              | 148,296,718                | 4,102                                 | 85,823,645                       | 2,374                                       | 3,175                                                                 |
|                                         | Nursing home / sheltered accommodation | 1,079,664,024              | 29,862                                | 933,749,795                      | 25,826                                      | 10,891                                                                |
|                                         | Total cost (excl. lost productivity)   | 1,471,431,949              | 40,698                                | 1,079,592,452                    | 29,860                                      | 22,465                                                                |
| Depression                              | Primary sector                         | 95,893,225                 | 539                                   | 34,953,943                       | 196                                         | 294                                                                   |
|                                         | Secondary sector - Outpatient          | 353,092,962                | 1,983                                 | 198,404,020                      | 1,115                                       | 4,415                                                                 |
|                                         | Secondary sector - Inpatient           | 632,094,332                | 3,551                                 | 437,349,885                      | 2,457                                       | 11,336                                                                |
|                                         | Filled prescriptions                   | 123,586,689                | 694                                   | 75,514,229                       | 424                                         | 447                                                                   |
|                                         | Home care                              | 147,797,688                | 830                                   | 94,735,383                       | 532                                         | 817                                                                   |
|                                         | Nursing home / sheltered accommodation | 510,771,406                | 2,869                                 | 367,705,421                      | 2,066                                       | 1,275                                                                 |
|                                         | Total cost (excl. lost productivity)   | 1,863,236,302              | 10,466                                | 1,208,662,881                    | 6,789                                       | 18,584                                                                |
| Developmental and behavioural disorders | Primary sector                         | 27,337,787                 | 266                                   | 10,369,345                       | 101                                         | 104                                                                   |
|                                         | Secondary sector - Outpatient          | 116,363,305                | 1,130                                 | 75,097,169                       | 729                                         | 3,890                                                                 |
|                                         | Secondary sector - Inpatient           | 236,746,401                | 2,299                                 | 190,215,735                      | 1,847                                       | 5,695                                                                 |
|                                         | Filled prescriptions                   | 53,648,059                 | 521                                   | 45,268,384                       | 440                                         | 477                                                                   |
|                                         | Home care                              | 5,642,767                  | 55                                    | 4,450,425                        | 43                                          | 28                                                                    |
|                                         | Nursing home / sheltered accommodation | 11,467,658                 | 111                                   | 8,904,950                        | 86                                          | 39                                                                    |

|                                          |                                        | Prevalent cohort - 2015    |                                       |                                  |                                             | Incident cohort - 2011-2015                                           |
|------------------------------------------|----------------------------------------|----------------------------|---------------------------------------|----------------------------------|---------------------------------------------|-----------------------------------------------------------------------|
| Brain disorder                           | Cost component                         | Actual costs in 2015 (EUR) | Actual costs per person in 2015 (EUR) | Attributable costs in 2015 (EUR) | Attributable costs per person in 2015 (EUR) | Attributable costs per person in the first year after diagnosis (EUR) |
|                                          | Total cost (excl. lost productivity)   | 451,205,976                | 4,382                                 | 334,306,007                      | 3,247                                       | 10,235                                                                |
| Drug abuse                               | Primary sector                         | 18,789,575                 | 379                                   | 6,103,985                        | 123                                         | 173                                                                   |
|                                          | Secondary sector - Outpatient          | 104,455,802                | 2,110                                 | 71,938,513                       | 1,453                                       | 3,539                                                                 |
|                                          | Secondary sector - Inpatient           | 294,331,957                | 5,944                                 | 257,849,075                      | 5,207                                       | 14,939                                                                |
|                                          | Filled prescriptions                   | 39,585,700                 | 799                                   | 30,697,450                       | 620                                         | 525                                                                   |
|                                          | Home care                              | 21,420,415                 | 433                                   | 17,004,322                       | 343                                         | 320                                                                   |
|                                          | Nursing home / sheltered accommodation | 55,090,031                 | 1,113                                 | 44,708,406                       | 903                                         | 324                                                                   |
|                                          | Total cost (excl. lost productivity)   | 533,673,480                | 10,778                                | 428,301,752                      | 8,650                                       | 19,820                                                                |
| Eating disorders                         | Primary sector                         | 6,954,226                  | 438                                   | 2,231,551                        | 141                                         | 112                                                                   |
|                                          | Secondary sector - Outpatient          | 41,617,887                 | 2,621                                 | 30,089,653                       | 1,895                                       | 8,660                                                                 |
|                                          | Secondary sector - Inpatient           | 78,974,413                 | 4,973                                 | 66,777,164                       | 4,205                                       | 21,099                                                                |
|                                          | Filled prescriptions                   | 5,121,915                  | 323                                   | 2,656,004                        | 167                                         | 108                                                                   |
|                                          | Home care                              | 1,027,908                  | 65                                    | 768,275                          | 48                                          | 40                                                                    |
|                                          | Nursing home / sheltered accommodation | 1,702,989                  | 107                                   | 1,282,483                        | 81                                          | 65                                                                    |
|                                          | Total cost (excl. lost productivity)   | 135,399,338                | 8,526                                 | 103,805,130                      | 6,536                                       | 30,084                                                                |
| Epilepsy                                 | Primary sector                         | 41,173,985                 | 580                                   | 19,904,667                       | 280                                         | 350                                                                   |
|                                          | Secondary sector - Outpatient          | 108,270,760                | 1,524                                 | 51,399,429                       | 723                                         | 3,615                                                                 |
|                                          | Secondary sector - Inpatient           | 236,872,420                | 3,334                                 | 162,384,494                      | 2,286                                       | 13,573                                                                |
|                                          | Filled prescriptions                   | 56,830,263                 | 800                                   | 39,757,000                       | 560                                         | 539                                                                   |
|                                          | Home care                              | 71,643,564                 | 1,008                                 | 57,009,489                       | 802                                         | 1,439                                                                 |
|                                          | Nursing home / sheltered accommodation | 186,490,441                | 2,625                                 | 148,199,767                      | 2,086                                       | 3,600                                                                 |
|                                          | Total cost (excl. lost productivity)   | 701,281,434                | 9,871                                 | 478,654,845                      | 6,737                                       | 23,117                                                                |
| Headache                                 | Primary sector                         | 45,555,311                 | 475                                   | 15,231,927                       | 159                                         | 213                                                                   |
|                                          | Secondary sector - Outpatient          | 133,513,223                | 1,393                                 | 53,710,708                       | 560                                         | 1,579                                                                 |
|                                          | Secondary sector - Inpatient           | 165,735,926                | 1,729                                 | 72,915,060                       | 761                                         | 2,660                                                                 |
|                                          | Filled prescriptions                   | 41,304,678                 | 431                                   | 18,445,725                       | 192                                         | 144                                                                   |
|                                          | Home care                              | 18,540,020                 | 193                                   | 5,347,719                        | 56                                          | 24                                                                    |
|                                          | Nursing home / sheltered accommodation | 38,547,780                 | 402                                   | 7,238,248                        | 76                                          | -2                                                                    |
|                                          | Total cost (excl. lost productivity)   | 443,196,937                | 4,625                                 | 172,889,385                      | 1,804                                       | 4,618                                                                 |
| Infections of the central nervous system | Primary sector                         | 11,203,340                 | 421                                   | 3,297,607                        | 124                                         | 168                                                                   |
|                                          | Secondary sector - Outpatient          | 33,558,808                 | 1,262                                 | 12,417,210                       | 467                                         | 2,276                                                                 |
|                                          | Secondary sector - Inpatient           | 53,806,027                 | 2,023                                 | 25,888,210                       | 974                                         | 19,530                                                                |
|                                          | Filled prescriptions                   | 9,714,465                  | 365                                   | 3,292,758                        | 124                                         | 181                                                                   |

|                                   |                                        | Prevalent cohort - 2015    |                                       |                                  |                                             | Incident cohort - 2011-2015                                           |
|-----------------------------------|----------------------------------------|----------------------------|---------------------------------------|----------------------------------|---------------------------------------------|-----------------------------------------------------------------------|
| Brain disorder                    | Cost component                         | Actual costs in 2015 (EUR) | Actual costs per person in 2015 (EUR) | Attributable costs in 2015 (EUR) | Attributable costs per person in 2015 (EUR) | Attributable costs per person in the first year after diagnosis (EUR) |
|                                   | Home care                              | 12,811,201                 | 482                                   | 7,584,973                        | 285                                         | 563                                                                   |
|                                   | Nursing home / sheltered accommodation | 27,418,463                 | 1,031                                 | 14,310,372                       | 538                                         | 461                                                                   |
|                                   | Total cost (excl. lost productivity)   | 148,512,305                | 5,585                                 | 66,791,130                       | 2,512                                       | 23,180                                                                |
| Intellectual disability           | Primary sector                         | 15,988,512                 | 583                                   | 9,893,121                        | 361                                         | 278                                                                   |
|                                   | Secondary sector - Outpatient          | 33,228,973                 | 1,213                                 | 17,182,705                       | 627                                         | 3,055                                                                 |
|                                   | Secondary sector - Inpatient           | 102,644,232                | 3,746                                 | 84,346,003                       | 3,078                                       | 9,397                                                                 |
|                                   | Filled prescriptions                   | 21,583,017                 | 788                                   | 17,432,722                       | 636                                         | 538                                                                   |
|                                   | Home care                              | 13,976,239                 | 510                                   | 12,449,542                       | 454                                         | 393                                                                   |
|                                   | Nursing home / sheltered accommodation | 32,339,423                 | 1,180                                 | 29,128,690                       | 1,063                                       | 598                                                                   |
|                                   | Total cost (excl. lost productivity)   | 219,760,396                | 8,020                                 | 170,432,783                      | 6,220                                       | 14,258                                                                |
| Multiple sclerosis                | Primary sector                         | 21,206,010                 | 1,503                                 | 16,200,681                       | 1,148                                       | 583                                                                   |
|                                   | Secondary sector - Outpatient          | 40,714,728                 | 2,885                                 | 27,233,358                       | 1,930                                       | 10,465                                                                |
|                                   | Secondary sector - Inpatient           | 43,448,943                 | 3,079                                 | 27,817,864                       | 1,971                                       | 4,925                                                                 |
|                                   | Filled prescriptions                   | 9,720,026                  | 689                                   | 5,629,372                        | 399                                         | 189                                                                   |
|                                   | Home care                              | 51,880,624                 | 3,676                                 | 49,746,582                       | 3,525                                       | 644                                                                   |
|                                   | Nursing home / sheltered accommodation | 31,328,567                 | 2,220                                 | 27,272,490                       | 1,933                                       | 335                                                                   |
|                                   | Total cost (excl. lost productivity)   | 198,298,897                | 14,051                                | 153,900,347                      | 10,905                                      | 17,140                                                                |
| Neuromuscular disorders           | Primary sector                         | 6,282,164                  | 901                                   | 3,972,937                        | 570                                         | 353                                                                   |
|                                   | Secondary sector - Outpatient          | 14,433,119                 | 2,071                                 | 8,172,495                        | 1,172                                       | 3,211                                                                 |
|                                   | Secondary sector - Inpatient           | 29,246,940                 | 4,196                                 | 20,898,189                       | 2,998                                       | 16,132                                                                |
|                                   | Filled prescriptions                   | 4,437,530                  | 637                                   | 2,451,542                        | 352                                         | 389                                                                   |
|                                   | Home care                              | 8,986,447                  | 1,289                                 | 7,194,501                        | 1,032                                       | 544                                                                   |
|                                   | Nursing home / sheltered accommodation | 8,955,012                  | 1,285                                 | 4,625,467                        | 664                                         | 147                                                                   |
|                                   | Total cost (excl. lost productivity)   | 72,341,211                 | 10,378                                | 47,315,130                       | 6,788                                       | 20,777                                                                |
| Other neurodegenerative disorders | Primary sector                         | 3,467,634                  | 1,660                                 | 2,695,799                        | 1,290                                       | 1,214                                                                 |
|                                   | Secondary sector - Outpatient          | 3,744,735                  | 1,792                                 | 1,557,828                        | 746                                         | 2,623                                                                 |
|                                   | Secondary sector - Inpatient           | 12,458,820                 | 5,963                                 | 9,519,636                        | 4,556                                       | 18,250                                                                |
|                                   | Filled prescriptions                   | 2,025,361                  | 969                                   | 1,312,465                        | 628                                         | 1,152                                                                 |
|                                   | Home care                              | 9,972,538                  | 4,773                                 | 9,295,614                        | 4,449                                       | 5,491                                                                 |
|                                   | Nursing home / sheltered accommodation | 15,620,797                 | 7,476                                 | 13,965,869                       | 6,684                                       | 3,904                                                                 |
|                                   | Total cost (excl. lost productivity)   | 47,289,884                 | 22,634                                | 38,347,211                       | 18,354                                      | 32,634                                                                |
| Parkinson's disease               | Primary sector                         | 14,860,564                 | 1,776                                 | 10,688,805                       | 1,278                                       | 910                                                                   |

|                                  |                                        | Prevalent cohort - 2015    |                                       |                                  |                                             | Incident cohort - 2011-2015                                           |
|----------------------------------|----------------------------------------|----------------------------|---------------------------------------|----------------------------------|---------------------------------------------|-----------------------------------------------------------------------|
| Brain disorder                   | Cost component                         | Actual costs in 2015 (EUR) | Actual costs per person in 2015 (EUR) | Attributable costs in 2015 (EUR) | Attributable costs per person in 2015 (EUR) | Attributable costs per person in the first year after diagnosis (EUR) |
|                                  | Secondary sector - Outpatient          | 17,312,390                 | 2,069                                 | 5,323,437                        | 636                                         | 2,069                                                                 |
|                                  | Secondary sector - Inpatient           | 46,402,317                 | 5,546                                 | 27,109,682                       | 3,240                                       | 8,711                                                                 |
|                                  | Filled prescriptions                   | 27,652,172                 | 3,305                                 | 23,257,252                       | 2,780                                       | 1,178                                                                 |
|                                  | Home care                              | 45,766,641                 | 5,470                                 | 38,139,915                       | 4,559                                       | 3,594                                                                 |
|                                  | Nursing home / sheltered accommodation | 118,302,501                | 14,140                                | 96,210,216                       | 11,499                                      | 5,067                                                                 |
|                                  | Total cost (excl. lost productivity)   | 270,296,586                | 32,307                                | 200,729,307                      | 23,992                                      | 21,530                                                                |
| Personality disorders            | Primary sector                         | 33,726,394                 | 475                                   | 12,370,687                       | 174                                         | 180                                                                   |
|                                  | Secondary sector - Outpatient          | 161,704,804                | 2,280                                 | 108,438,891                      | 1,529                                       | 5,307                                                                 |
|                                  | Secondary sector - Inpatient           | 294,012,210                | 4,145                                 | 237,084,594                      | 3,342                                       | 10,946                                                                |
|                                  | Filled prescriptions                   | 47,982,591                 | 676                                   | 33,993,717                       | 479                                         | 391                                                                   |
|                                  | Home care                              | 18,267,898                 | 258                                   | 13,204,541                       | 186                                         | 60                                                                    |
|                                  | Nursing home / sheltered accommodation | 50,162,995                 | 707                                   | 39,971,083                       | 563                                         | 175                                                                   |
|                                  | Total cost (excl. lost productivity)   | 605,856,892                | 8,541                                 | 445,063,513                      | 6,274                                       | 17,058                                                                |
| Polyneuropathy                   | Primary sector                         | 22,995,926                 | 721                                   | 9,555,562                        | 300                                         | 324                                                                   |
|                                  | Secondary sector - Outpatient          | 84,279,793                 | 2,643                                 | 47,316,582                       | 1,484                                       | 3,465                                                                 |
|                                  | Secondary sector - Inpatient           | 144,827,869                | 4,542                                 | 88,462,288                       | 2,775                                       | 8,416                                                                 |
|                                  | Filled prescriptions                   | 30,234,724                 | 948                                   | 16,995,029                       | 533                                         | 569                                                                   |
|                                  | Home care                              | 53,022,119                 | 1,663                                 | 35,217,614                       | 1,105                                       | 773                                                                   |
|                                  | Nursing home / sheltered accommodation | 92,592,235                 | 2,904                                 | 40,739,401                       | 1,278                                       | -89                                                                   |
|                                  | Total cost (excl. lost productivity)   | 427,952,666                | 13,423                                | 238,286,476                      | 7,474                                       | 13,458                                                                |
| Schizophrenia spectrum disorders | Primary sector                         | 25,870,906                 | 427                                   | 7,901,500                        | 130                                         | 130                                                                   |
|                                  | Secondary sector - Outpatient          | 184,183,351                | 3,039                                 | 138,302,570                      | 2,282                                       | 7,692                                                                 |
|                                  | Secondary sector - Inpatient           | 471,018,165                | 7,773                                 | 418,546,262                      | 6,907                                       | 28,598                                                                |
|                                  | Filled prescriptions                   | 60,736,022                 | 1,002                                 | 47,173,595                       | 778                                         | 584                                                                   |
|                                  | Home care                              | 40,669,756                 | 671                                   | 31,640,056                       | 522                                         | 328                                                                   |
|                                  | Nursing home / sheltered accommodation | 144,768,784                | 2,389                                 | 123,117,720                      | 2,032                                       | 1,259                                                                 |
|                                  | Total cost (excl. lost productivity)   | 927,246,985                | 15,302                                | 766,681,703                      | 12,652                                      | 38,591                                                                |
| Sleep disorders                  | Primary sector                         | 31,353,798                 | 512                                   | 11,799,623                       | 193                                         | 238                                                                   |
|                                  | Secondary sector - Outpatient          | 98,914,079                 | 1,616                                 | 41,921,108                       | 685                                         | 2,096                                                                 |
|                                  | Secondary sector - Inpatient           | 145,942,944                | 2,385                                 | 69,035,777                       | 1,128                                       | 3,396                                                                 |
|                                  | Filled prescriptions                   | 41,479,250                 | 678                                   | 23,820,309                       | 389                                         | 394                                                                   |
|                                  | Home care                              | 20,461,339                 | 334                                   | 9,184,546                        | 150                                         | 217                                                                   |

|                          |                                        | Prevalent cohort - 2015    |                                       |                                  |                                             | Incident cohort - 2011-2015                                           |
|--------------------------|----------------------------------------|----------------------------|---------------------------------------|----------------------------------|---------------------------------------------|-----------------------------------------------------------------------|
| Brain disorder           | Cost component                         | Actual costs in 2015 (EUR) | Actual costs per person in 2015 (EUR) | Attributable costs in 2015 (EUR) | Attributable costs per person in 2015 (EUR) | Attributable costs per person in the first year after diagnosis (EUR) |
|                          | Nursing home / sheltered accommodation | 31,784,606                 | 519                                   | 6,941,740                        | 113                                         | 45                                                                    |
|                          | Total cost (excl. lost productivity)   | 369,936,015                | 6,045                                 | 162,703,103                      | 2,659                                       | 6,386                                                                 |
| Stress-related disorders | Primary sector                         | 86,677,745                 | 444                                   | 29,534,278                       | 151                                         | 251                                                                   |
|                          | Secondary sector - Outpatient          | 334,672,975                | 1,716                                 | 190,005,389                      | 974                                         | 3,344                                                                 |
|                          | Secondary sector - Inpatient           | 594,516,328                | 3,048                                 | 435,161,116                      | 2,231                                       | 8,650                                                                 |
|                          | Filled prescriptions                   | 94,996,342                 | 487                                   | 55,121,881                       | 283                                         | 263                                                                   |
|                          | Home care                              | 52,036,361                 | 267                                   | 33,412,202                       | 171                                         | 132                                                                   |
|                          | Nursing home / sheltered accommodation | 136,104,200                | 698                                   | 94,380,524                       | 484                                         | 302                                                                   |
|                          | Total cost (excl. lost productivity)   | 1,299,003,951              | 6,660                                 | 837,615,391                      | 4,295                                       | 12,942                                                                |
| Stroke                   | Primary sector                         | 87,618,648                 | 759                                   | 36,193,449                       | 313                                         | 275                                                                   |
|                          | Secondary sector - Outpatient          | 200,887,719                | 1,740                                 | 56,107,195                       | 486                                         | 1,741                                                                 |
|                          | Secondary sector - Inpatient           | 462,612,656                | 4,006                                 | 236,363,400                      | 2,047                                       | 24,956                                                                |
|                          | Filled prescriptions                   | 92,706,631                 | 803                                   | 39,925,529                       | 346                                         | 356                                                                   |
|                          | Home care                              | 262,819,364                | 2,276                                 | 179,189,377                      | 1,552                                       | 1,443                                                                 |
|                          | Nursing home / sheltered accommodation | 710,435,792                | 6,152                                 | 461,833,282                      | 4,000                                       | 1,882                                                                 |
|                          | Total cost (excl. lost productivity)   | 1,817,080,811              | 15,736                                | 1,009,612,232                    | 8,743                                       | 30,654                                                                |
| Traumatic brain injury   | Primary sector                         | 83,545,461                 | 338                                   | 18,644,498                       | 75                                          | 140                                                                   |
|                          | Secondary sector - Outpatient          | 239,309,856                | 968                                   | 69,116,574                       | 280                                         | 707                                                                   |
|                          | Secondary sector - Inpatient           | 428,225,272                | 1,732                                 | 212,472,590                      | 859                                         | 7,836                                                                 |
|                          | Filled prescriptions                   | 75,591,648                 | 306                                   | 26,356,451                       | 107                                         | 117                                                                   |
|                          | Home care                              | 92,933,811                 | 376                                   | 50,946,346                       | 206                                         | 438                                                                   |
|                          | Nursing home / sheltered accommodation | 277,317,019                | 1,122                                 | 163,141,079                      | 660                                         | 950                                                                   |
|                          | Total cost (excl. lost productivity)   | 1,196,923,068              | 4,841                                 | 540,677,538                      | 2,187                                       | 10,188                                                                |

Abbreviations: EUR, Euro.

**Suppl. Table 5. Lost productivity in persons with prevalent brain disorders in Denmark in 2015, and incident brain disorders in Denmark during 2011-2015.**

| Brain disorder                           | Lost productivity associated with illness  |                                                       |                                                                           | Lost productivity due to premature death                           |                                                                               |                                                                                                       |
|------------------------------------------|--------------------------------------------|-------------------------------------------------------|---------------------------------------------------------------------------|--------------------------------------------------------------------|-------------------------------------------------------------------------------|-------------------------------------------------------------------------------------------------------|
|                                          | Attributable lost production in 2015 (EUR) | Attributable lost production per person in 2015 (EUR) | Attributable lost production per person in the year after diagnosis (EUR) | Attributable lost production among patients who died in 2015 (EUR) | Attributable lost production per person among patients who died in 2015 (EUR) | Attributable lost production per person among patients who died within one year after diagnosis (EUR) |
| Any brain disorder                       | 10,871,306,597                             | 15,471                                                | 11,501                                                                    | 310,599,261                                                        | 66,595                                                                        | 176,821                                                                                               |
| Alcohol abuse                            | 2,177,095,714                              | 30,509                                                | 26,454                                                                    | 60,885,257                                                         | 30,519                                                                        | 83,486                                                                                                |
| Anxiety disorders                        | 1,540,715,518                              | 19,281                                                | 19,717                                                                    | 32,197,400                                                         | 59,515                                                                        | 145,515                                                                                               |
| Bipolar disorder                         | 474,459,456                                | 27,521                                                | 25,383                                                                    | 6,136,984                                                          | 37,883                                                                        | 136,861                                                                                               |
| Brain tumours                            | 62,414,375                                 | 8,259                                                 | 15,068                                                                    | 44,062,492                                                         | 174,851                                                                       | 205,107                                                                                               |
| Cerebral palsy                           | 126,484,627                                | 24,291                                                | 31,767                                                                    | 487,951                                                            | 7,999                                                                         | 55,995                                                                                                |
| Dementia                                 | 118,974,339                                | 32,436                                                | 28,305                                                                    | 1,408,193                                                          | 8,140                                                                         | 28,505                                                                                                |
| Depression                               | 2,900,683,027                              | 21,708                                                | 20,838                                                                    | 64,470,952                                                         | 63,706                                                                        | 162,215                                                                                               |
| Developmental and behavioural disorders  | 845,403,290                                | 14,455                                                | 22,423                                                                    | 6,886,963                                                          | 47,171                                                                        | 96,899                                                                                                |
| Drug abuse                               | 1,330,382,612                              | 29,742                                                | 24,512                                                                    | 14,271,378                                                         | 22,908                                                                        | 67,596                                                                                                |
| Eating disorders                         | 83,103,235                                 | 5,798                                                 | 6,941                                                                     | 1,407,442                                                          | 54,132                                                                        | 25,604                                                                                                |
| Epilepsy                                 | 757,818,260                                | 16,449                                                | 18,764                                                                    | 39,647,665                                                         | 61,469                                                                        | 167,731                                                                                               |
| Headache                                 | 490,757,570                                | 6,493                                                 | 6,165                                                                     | 21,177,971                                                         | 101,330                                                                       | 174,465                                                                                               |
| Infections of the central nervous system | 30,214,014                                 | 1,814                                                 | 2,093                                                                     | 9,137,033                                                          | 103,830                                                                       | 152,402                                                                                               |
| Intellectual disability                  | 528,043,228                                | 29,465                                                | 30,237                                                                    | 278,285                                                            | 1,457                                                                         | 9,078                                                                                                 |
| Multiple sclerosis                       | 189,128,371                                | 16,804                                                | 9,354                                                                     | 1,721,160                                                          | 15,367                                                                        | 142,356                                                                                               |
| Neuromuscular disorders                  | 61,263,234                                 | 14,022                                                | 9,262                                                                     | 1,733,127                                                          | 36,875                                                                        | 106,274                                                                                               |
| Other neurodegenerative disorders        | 31,346,429                                 | 27,716                                                | 21,953                                                                    | 3,829,300                                                          | 55,497                                                                        | 134,409                                                                                               |
| Parkinson's disease                      | 32,248,038                                 | 22,662                                                | 14,259                                                                    | 3,565                                                              | 105                                                                           | 49,396                                                                                                |
| Personality disorders                    | 1,675,321,683                              | 25,663                                                | 22,217                                                                    | 13,071,803                                                         | 34,858                                                                        | 105,239                                                                                               |
| Polyneuropathy                           | 238,332,654                                | 16,662                                                | 16,701                                                                    | 8,543,728                                                          | 29,873                                                                        | 78,341                                                                                                |
| Schizophrenia spectrum disorders         | 1,707,738,198                              | 33,710                                                | 26,581                                                                    | 9,960,281                                                          | 17,173                                                                        | 90,396                                                                                                |
| Sleep disorders                          | 336,760,666                                | 8,691                                                 | 8,554                                                                     | 18,811,390                                                         | 79,373                                                                        | 133,551                                                                                               |
| Stress-related disorders                 | 3,167,569,516                              | 19,310                                                | 19,520                                                                    | 63,414,446                                                         | 69,917                                                                        | 175,773                                                                                               |
| Stroke                                   | 630,213,779                                | 16,502                                                | 14,382                                                                    | 25,874,307                                                         | 39,085                                                                        | 140,923                                                                                               |
| Traumatic brain injury                   | 1,241,809,744                              | 7,179                                                 | 7,245                                                                     | 41,136,013                                                         | 48,739                                                                        | 121,008                                                                                               |

Abbreviations: EUR, Euro.

## Supplementary figures

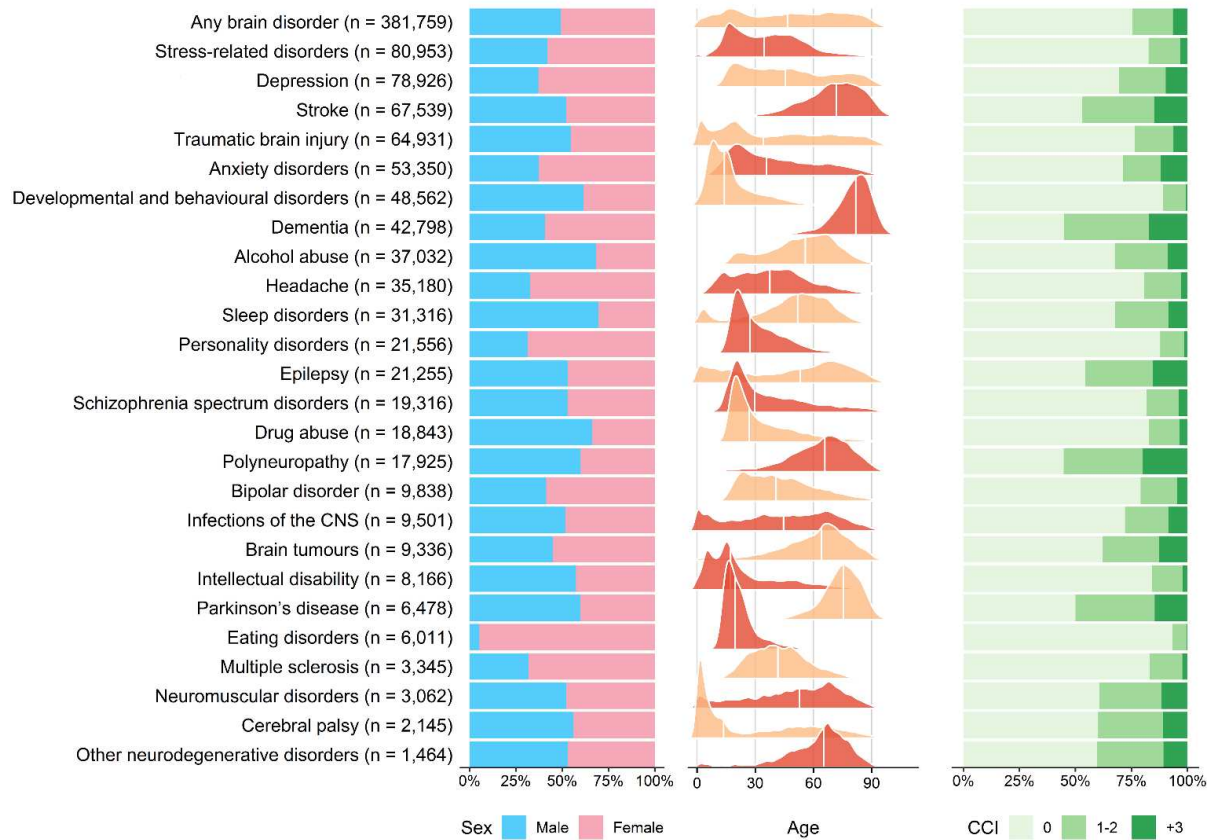

**Suppl. Figure 1. Characteristics of patients with incident brain disorders in Denmark during 2011-2015 sorted from highest to lowest incidence (the white line in the age distribution represents the median age in each cohort).**

Abbreviations: CNS, central nervous system; CCI, Charlson Comorbidity Index





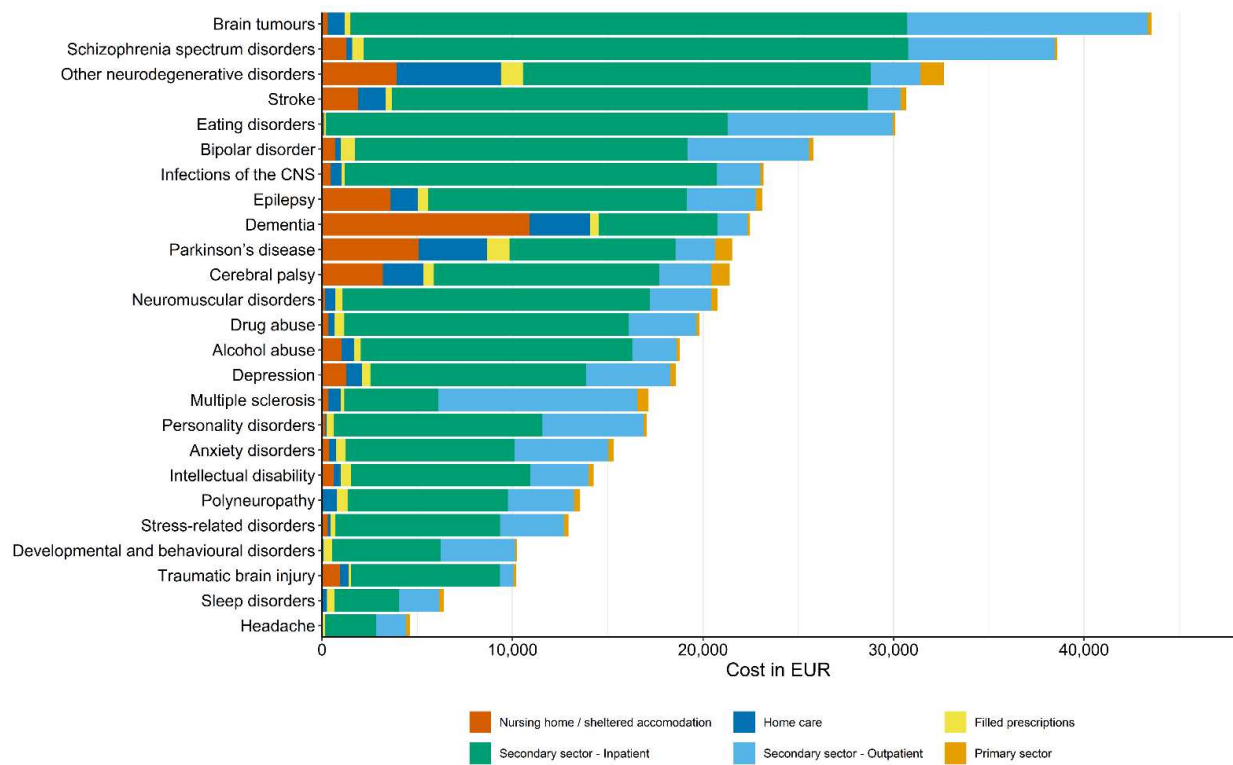

**Suppl. Figure 3. Attributable direct costs per person during the first year after diagnosis in persons with incident brain disorders in Denmark during 2011-2015 (in 2015 prices) sorted from highest to lowest costs.**

**Abbreviations:** CNS, central nervous system

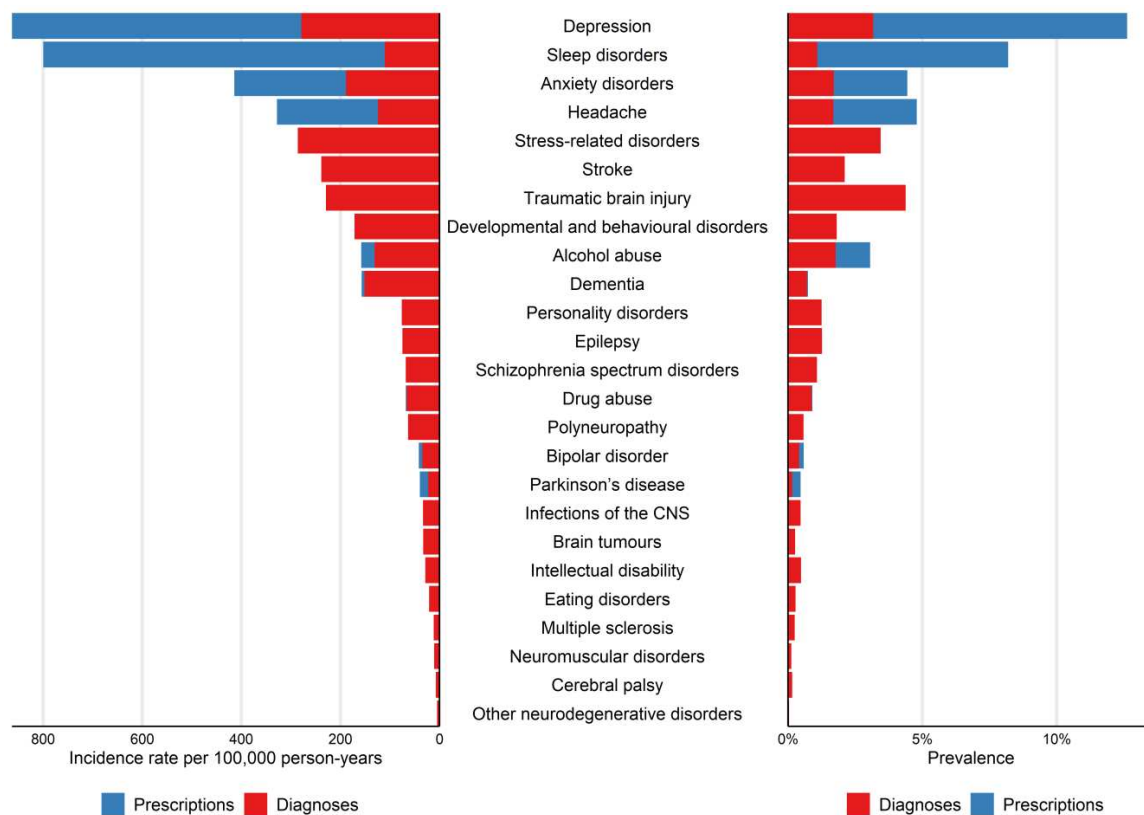

**Suppl. Figure 4. Occurrence of brain disorders in the Danish population including incidence during 2011-2015 and prevalence in 2015. Alcohol abuse, bipolar disorder, dementia, depression, drug abuse, headache, multiple sclerosis, Parkinson's disease, and sleep disorders were identified by either recorded hospital diagnoses or filled prescriptions of relevant medication, and all other brain disorders were identified by recorded hospital diagnoses.**

Abbreviations: CNS, central nervous system

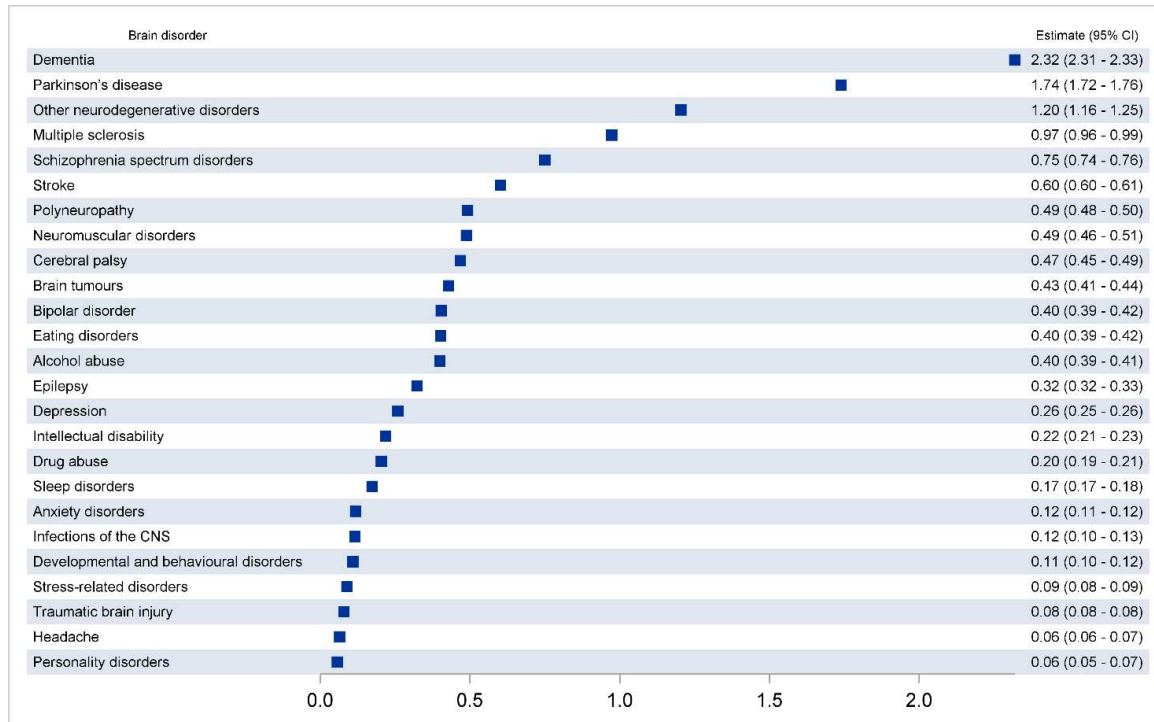

**Suppl. Figure 5. Costs in €10,000 associated with each of 25 groups of brain disorders adjusted for comorbid brain disorders in persons with prevalent brain disorders in Denmark in 2015 (2015 prices).** Abbreviations: CI, confidence interval; CNS, central nervous system

## Supplementary references

1. Schmidt M, Schmidt SAJ, Adelborg K, et al. The Danish health care system and epidemiological research: from health care contacts to database records. *Clin Epidemiol* 2019;11:563-91. doi: 10.2147/clep.S179083
2. Schmidt M, Schmidt SA, Sandegaard JL, et al. The Danish National Patient Registry: a review of content, data quality, and research potential. *Clinical epidemiology* 2015;7:449-90. doi: 10.2147/CLEP.S91125 [doi]
3. Mors O, Perto GP, Mortensen PB. The Danish Psychiatric Central Research Register. *Scand J Public Health* 2011;39(7 Suppl):54-7. doi: 10.1177/1403494810395825
4. Ankjaer-Jensen A, Rosling P, Bilde L. Variable prospective financing in the Danish hospital sector and the development of a Danish case-mix system. *Health care management science* 2006;9(3):259-68.
5. Bilde L, Ankjaer-Jensen A, Danneskiold-Samsøe B. The "Health Benefit Basket" in Denmark: a description of entitlements, actors, and decision-making processes in the curative health sector. *Eur J Health Econ* 2005;Suppl:11-7. doi: 10.1007/s10198-005-0313-2
6. Pottegård A, Schmidt SAJ, Wallach-Kildemoes H, et al. Data Resource Profile: The Danish National Prescription Registry. *Int J Epidemiol* 2017;46(3):798-98f. doi: 10.1093/ije/dyw213
7. Statistics Denmark. Documentation of statistics [cited 2019 12/12]. Available from: <https://www.dst.dk/en/Statistik/dokumentation/documentationofstatistics> accessed 12 Dec 2019.
